# Supplementary material
Source: PubMed Central journal article supplement (PMC7572911)

# “Structure and Function of NzeB, a Versatile C–C and C–N Bond Forming Diketopiperazine Dimerase”

Vikram V. Shende,<sup>†</sup> Yogan Khatri,<sup>†</sup> Sean Newmister,<sup>†</sup> Jacob N. Sanders,<sup>‡</sup> Petra Lindovska,<sup>Δ</sup> Fengyan Yu,<sup>‡</sup> Tyler J. Doyon,<sup>‡</sup> Justin Kim,<sup>Δ</sup> K. N. Houk,<sup>‡,\*</sup> Mohammad Movassaghi,<sup>Δ,\*</sup> and David H. Sherman<sup>‡,\*,†,\*</sup>

<sup>†</sup>*Life Sciences Institute, <sup>‡</sup>Department of Medicinal Chemistry, Program in Chemical Biology, <sup>Δ</sup>Department of Chemistry, and <sup>‡</sup>Department of Microbiology & Immunology, University of Michigan, Ann Arbor, Michigan, 48109, United States*

<sup>Δ</sup>*Department of Chemistry, Massachusetts Institute of Technology, Cambridge, Massachusetts, 02139, United States*

<sup>‡</sup>*Department of Chemistry, University of California Los Angeles, Los Angeles, California, 90095, United States*

## Supporting Information

### Table of Contents:

|                                                                                                                                                                                                     |         |
|-----------------------------------------------------------------------------------------------------------------------------------------------------------------------------------------------------|---------|
| <b>Instrumentation</b> .....                                                                                                                                                                        | S3      |
| <b><i>Streptomyces</i> sp. CMBMQ-030 genomic DNA sequencing</b> .....                                                                                                                               | S4      |
| <b>Supplementary Table 1.</b> Summary of genome assembly dataset and parameters .....                                                                                                               | S4      |
| <b>Cloning of NascA, NascB, and NznA</b> .....                                                                                                                                                      | S5      |
| <b>Supplementary Table 2.</b> Primers used in cloning .....                                                                                                                                         | S5      |
| <b>Codon optimized sequence for NznB</b> .....                                                                                                                                                      | S5      |
| <b>Overexpression and analysis of CDPSs NascA/NznA.</b> .....                                                                                                                                       | S6      |
| <b>Supplementary Figure 1.</b> HPLC traces for NascA/NznA Expression Extractions .....                                                                                                              | S6      |
| <b>Supplementary Figure 2.</b> HPLC/MS Analysis of Diketopiperazine 6 Isolated From CDPS Culture .....                                                                                              | S7      |
| <b>Supplementary Figure 3.</b> <sup>1</sup> H NMR characterization of purified DKP 6 from NascA CDPS overexpression .....                                                                           | S8      |
| <b>Supplementary Figure 4.</b> <sup>13</sup> C NMR characterization of purified DKP 6 from NascA CDPS overexpression .....                                                                          | S9      |
| <b>Supplementary Figure 5.</b> HPLC/MS Analysis of Diketopiperazine SI-01 Isolated From CDPS Culture .....                                                                                          | S10     |
| <b>Supplementary Figure 6.</b> <sup>1</sup> H NMR characterization of purified DKP SI-01 from NznA expression .....                                                                                 | S11     |
| <b>Supplementary Figure 7.</b> <sup>13</sup> C NMR characterization of purified DKP SI-01 from NznA expression .....                                                                                | S12     |
| <b>Supplementary Figure 8.</b> HPLC Trace for NzeB CDPS Overexpression .....                                                                                                                        | S13     |
| General procedure for overexpression, purification and spectral characterization of cytochrome P450s .....                                                                                          | S14     |
| <b>Supplementary Figure 9.</b> UV-Visible spectra of NzeB .....                                                                                                                                     | S15     |
| <b>Supplementary Figure 10.</b> Spin shift titrations with NzeB and brevianamide F (6) .....                                                                                                        | S16     |
| General reaction conditions for analytical scale P450 reactions .....                                                                                                                               | S17     |
| General reaction conditions for preparatory scale P450 reactions .....                                                                                                                              | S17     |
| <b>Supplementary Figure 11.</b> HPLC/MS traces with extraction ion chromatograms (EIC) for analytical scale heterodimerization of SI-01 and DKP 6 to form (–)-naseazepine A catalyzed by NznB ..... | S19     |
| <b>Supplementary Figure 12.</b> HPLC traces from NzeB catalyzed heterodimerizations .....                                                                                                           | S20     |
| <b>Supplementary Figure 13.</b> HPLC traces from NzeB alanine scanning mutants .....                                                                                                                | S21     |
| <b>Supplementary Figure 14 &amp; 15.</b> <sup>1</sup> H and <sup>13</sup> C NMR spectra for (–)-aspergilazine A .....                                                                               | S22     |
| <b>Supplementary Figures 16 – 20.</b> NMR Spectra for 18 .....                                                                                                                                      | S24-S28 |
| <b>Supplementary Table 3.</b> Cytochromes P450 used to generate sequence similarity network (SSN) .....                                                                                             | S29     |
| <b>Process of crystallization</b> .....                                                                                                                                                             | S30     |
| <b>Supplementary Table 4.</b> Data Collection Statistics .....                                                                                                                                      | S31     |
| <b>Supplementary Figure 21.</b> Comparison of A) NzeB substrate bound, and B) substrate free active sites .....                                                                                     | S32     |
| <b>Supplementary Figure 22.</b> NzeB active site cyclization tunnel .....                                                                                                                           | S33     |
| <b>Crystallography References</b> .....                                                                                                                                                             | S34     |

|                                                                                                                                                                                                       |           |
|-------------------------------------------------------------------------------------------------------------------------------------------------------------------------------------------------------|-----------|
| <b>Computational Methods</b> .....                                                                                                                                                                    | S35       |
| <b>Supplementary Table 5.</b> Optimized Quantum Mechanical Energies and Geometries .....                                                                                                              | S36       |
| <b>Supplementary Figure 23.</b> Reaction coordinate diagrams for (+)-nasesezine B .....                                                                                                               | S93       |
| <b>Computational References</b> .....                                                                                                                                                                 | S94       |
| <b>Chemistry: General Procedures, Materials, and Instrumentation</b> .....                                                                                                                            | S95       |
| <b>Positional Numbering System</b> .....                                                                                                                                                              | S96       |
| <b>Diketopiperazine bromide (-)-8</b> .....                                                                                                                                                           | S97       |
| <b><i>meta</i>-(-)-Nin,Nin'-Dicarboxybenzyl <i>iso</i>-Nasesezine C (10) and <i>para</i>-(-)-Nin,Nin'-Dicarboxybenzyl<br/>Nasesezine C (9)</b> .....                                                  | S98       |
| <b>(-)-nasesezine C (4)</b> .....                                                                                                                                                                     | S100      |
| <b>(-)-<i>iso</i>-nasesezine C (11)</b> .....                                                                                                                                                         | S101      |
| <b>Supplementary Table 6.</b> Comparison of our <sup>13</sup> C NMR data for (-)-nasesezine C (4) and (-)- <i>iso</i> -nasesezine<br>C (11) with literature data (CD <sub>3</sub> OD).....            | S102      |
| <b>Supplementary Table 7.</b> Comparison of our <sup>1</sup> H NMR data for (-)-nasesezine C (4) and (-)- <i>iso</i> - nasesezine<br>C (11) with literature data (DMSO- <i>d</i> <sub>6</sub> ) ..... | S103      |
| <b>Synthetic References</b> .....                                                                                                                                                                     | S104      |
| <b>Synthetic NMR Spectra</b> .....                                                                                                                                                                    | S105-S118 |

## Instrumentation

All UV-Visible spectra were acquired using a single beam Molecular Devices Spectra Max M5 spectrophotometer, with a 1cm quartz cuvette. Analytical HPLC data was acquired using a Shimadzu HPLC system comprised of two LC-20AD<sub>XR</sub> pumps, a SIL-20AC<sub>XR</sub> autosampler, and a SPD-M20A diode array detector. Preparatory HPLC was performed using a Beckman Coulter stack comprised of a System Gold 125 solvent module, 168 detector, and SC100 fraction collector. <sup>1</sup>H NMR spectra were recorded on Varian 600 MHz spectrometers and are reported relative to residual solvent peak (CD<sub>2</sub>HOD: δ 3.31). <sup>13</sup>C NMR spectra were reported relative to residual solvent peaks (CD<sub>2</sub>HOD: δ 49.0).

### ***Streptomyces* sp. CMBMQ-030 genomic DNA sequencing**

The genomic DNA of *Streptomyces* sp. CMB-MQ030 was extracted and purified as prescribed using the Promega Wizard® Genomic DNA Purification Kit. The genomic DNA (2x250 bp paired-end) was sequenced using Illumina HiSeq 2500 sequencing system at University of Michigan DNA Sequencing Core. Briefly, the genomic DNA sample was first sheared to approximately 500 nucleotide average fragment size, then Illumina-compatible sequencing libraries were prepared from those fragments on an Apollo 324 robotic workstation (WaferGen Biosystems), using the Kapa HTP Library Preparation Kit (KAPABiosystem) according to the manufacturer's protocols. Subsequent libraries were sequenced on an Illumina HiSeq 2000, obtaining paired-end sequence data with 100 nucleotide reads at each end, as per recommended protocols from Illumina, Inc. The generated next-generation sequencing data were then *de novo* assembled using Velvet 1.2.10.

**Supplementary Table 1.** Summary of genome assembly dataset and parameters

| <b>Genome</b>                          | <b>Number of reads</b> | <b>k-mer</b> | <b>Coverage cutoff</b> | <b>N50</b> | <b>Number of contigs</b> |
|----------------------------------------|------------------------|--------------|------------------------|------------|--------------------------|
| <i>Streptomyces</i> sp.<br>(CMB-MQ030) | 33,263,004             | 51           | 10                     | 66,868     | 591                      |

### Cloning of NascA, NascB, and NznA

The PCR primers were designed to introduce an *NdeI* restriction site at the 5' end of the fragment and a *HindIII* restriction site 3' end, respectively. The coding sequences were amplified from the genomic DNA of *Streptomyces sp.* CMB-MQ030 using primers for the associated target gene. The expression constructs were designed in pET28b vector cloning at *NdeI* and *HindIII* restriction sites for NascA, NznA and NascB. NznB+09 and NzeB were cloned into pET28b using Quickchange mutagenesis. The nucleotide sequences were confirmed by automated sequencing (University of Michigan DNA Sequencing Core).

**Supplementary Table 2.** Primers used in cloning NascA, NasB, NznA, NznB, and extending codon optimized sequence of NznB

| Gene          | Primer  | Rest. Site     | 5'→3'                                                                                        |
|---------------|---------|----------------|----------------------------------------------------------------------------------------------|
| NascA         | Forward | <i>NdeI</i>    | CCAACCcatatgGTGAACACTTCCCTCGCTGCGGTGGCCGGC                                                   |
| NascA         | Reverse | <i>HindIII</i> | CCAACCaaagcttGCGTTCGGCCGCCCGGTCCCGCAGCAGGAT                                                  |
| NascB         | Forward | <i>NdeI</i>    | CCAACCcatatgGTGACCACCACCGCCACGCTGACCTACCCC                                                   |
| NascB         | Reverse | <i>HindIII</i> | CCAACCaaagctt<br>CCAGGTGGCGGGAAGCGCCCGCGGACGGCG                                              |
| NznA          | Forward | <i>NdeI</i>    | CCAACCcatatgATGGCCACACACGCCTCCGCACCCGCACCC                                                   |
| NznA          | Reverse | <i>HindIII</i> | CCAACCaaagcttCTGCTGCGTCACGCGGTCCTTGAGGAG                                                     |
| NznB (CO) +09 | Forward |                | GTGGATCCGTATACCAAAGAATGCCGTACCGTGACCACCGC<br>GCCGGTTCCGCT                                    |
| NznB (CO) +19 | Forward |                | GTGATTTCGTCGCGAGCCGCATCGTAGCCCGGTGGATCCGTA<br>TACCAAAGAATGCCGTACCGTGACCACCGCGCCGGTTCCGC<br>T |
| NzeB          | Forward |                | ctgagaatctctacttccaaggcgctagcGTGACCACCACCACCGCCACG<br>CTGACCT                                |
| NzeB          | Reverse |                | cctttcgggctttgttagcagccggtatcTCACCAGGTGGCGGGGATCGCCC<br>GC                                   |

### Codon optimized sequence for NznB

ACCACCGCGCCGGTTCCGCTGACCTTCCCGTTTTACGATTGGAGCCAAGAGCTGAGCCCGCACCATGAG  
CGTCTGCGTGAAGCGGATGCGCCGGTGTGCCCGGTGGTTAGCGAGTACACCGGTGACCGTCTGTGGCT  
GGTTACCGGTTATGCGACCGCGAAGCGTCTGCTGGAAGATCGTCGTTTTACGAGCACCAGCGGCGATGGC  
GCCGGGTGCGCCGCGTCAGGAGCCGGTGGAACTGCGTGCGCCGGGCACCACCGGTGATGGTGTGAGC  
GTTCTGCGTGAGGCGGGTCTGCGTACCGTTTTTACCGAAGGTCTGGGTCCGCGTGCGGCGCGTCTGTCAC  
GGTAAATGGCTGCGTGATCGTGCGGACACCCTGCTGCGTGATGTGGCGGAGTGCGAAGGTCCGGTTGAT  
CTGGCGGCGGACTTTGCGCAGCCGCTGGCGGTGGCGATGACCAGCCGTGTTCTGCTGGGTGAACTGAG  
CACCGAGGAAGCGGCGCTGCTGCGTGATCGTACCGATCTGGCGCTGCAGTTTTGCGGTGCGACCGCGG  
AGGAACAACGTGGTGGCTGATCGATATTCACCGTTTTCTTTACCGCGCATGCGCGTCTGCTGGCGGATG  
GTCCGGGTGACCACCTGCTGAAGCGTCTGGCGGAGGCGCCGGCGGAAAACGGTCCGCTGGGTGATGCG  
GCGCTGAGCGAAATTGCGGCGCTGCTGCTGATTGCGGGTTTTCCGACCAGCAGCGGCTTTCTGTGCGGT  
GCGCTGATCACCTGCTGCGTCACCCGAGGCGGTGGGCCGTCTGCGTCTGATCCGGAACCTGATTCC  
GGACGCGGTTGAGGAACTGCTGCGTCATAACCCGCTGAGCACCGGTGCGGCGAAACGTATGGCGACCG  
AGGACGCGGATATCGACGGCGTGCGTATTCGTCGTGGTGGCGATGGTTAGCCTGGAAGCGGCG  
AACCACGATCCGGACGCGTTTCGACGATCCGGATAGCTTTCGTCCGGAACGTCAAGGTCCGGGTACCTG  
GGTTTTGGCCACGGTCCGAACTTTTGCCCGGTAACCGTCTGGCGCGTTGCCTGATTGATGCGATGGTG  
CGTGCGGTTGCGCGTCTCCGGGTCTGCACCTGACCGTTGGTCCGGAGGAAATCCGTTGGCACGAAG  
CCTGTTCTTTCGTCTGTCGTCGAAGGCGATTCCGGCGAGCTGG

### Overexpression and analysis of CDPSs NascA/NznA.

The expression of CDPS was performed by transforming the plasmid into the competent cell *E. coli* strain C41(DE3) and selected on Luria-Bertani (LB) medium plates containing 50 µg/mL kanamycin. A single colony was grown overnight in 5 mL LB broth containing the same concentration of the antibiotics. The main culture was prepared by inoculating 1% of each overnight culture into a 2 L baffled flask containing 1 L of LB containing 50 µg/mL kanamycin. The cultures were incubated at 37°C and 250 rpm for 3-4 h until the absorbance  $A_{590nm} = 0.6$ . The expression of CDPSs was induced by the addition of 1 mM isopropyl β-D-1-thiogalactopyranoside (IPTG). The cultures were incubated further at 18°C for 18 h shaking at 180 rpm. Cells were harvested by centrifugation at 5000×g at 4°C for 15 min and a 1 mL aliquot of the supernatant was extracted with 1 mL CHCl<sub>3</sub> (3x). The organic extracts were dried and solvents were removed *en vacuo*. Residue was resuspended in 100 µL of HPLC grade methanol for HPLC analysis in which the samples was resolved using a linear gradient of 5-100% acetonitrile: water (0.1% formic acid) over 30 min (1.5 mL/min flow rate) on a Phenomenex Luna 5µ C-18(2) 100A, 250 × 4.60mm 5 micron column.

**Supplementary Figure 1.** HPLC traces for NascA/NznA Expression Extractions

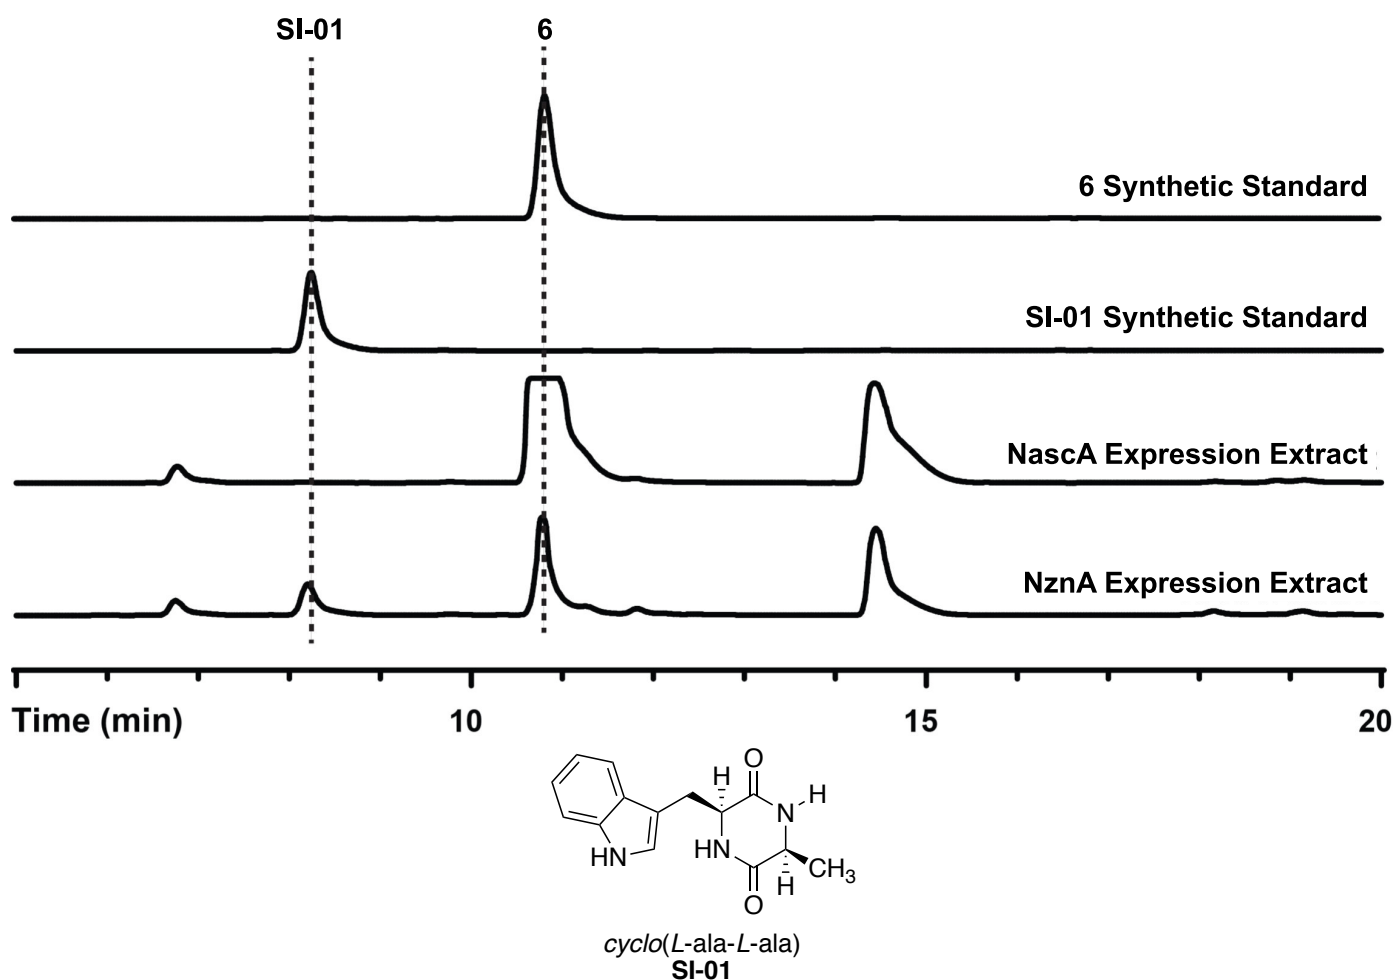

## Supplementary Figure 2. HPLC/MS Analysis of Diketopiperazine 6 Isolated From CDPS Culture

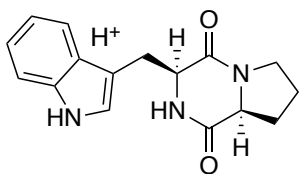

Exact Mass: 284.1394

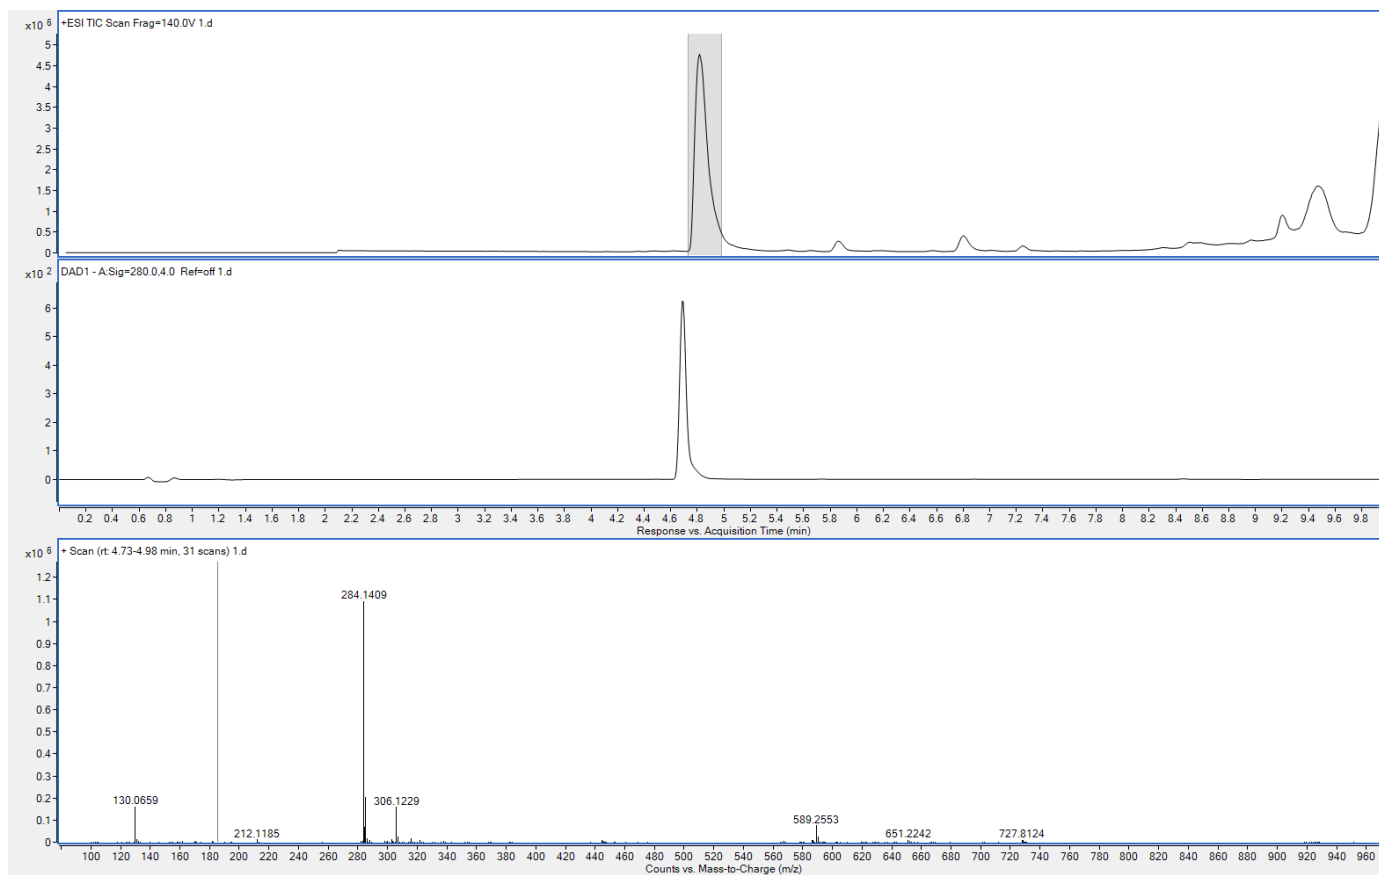

**Supplementary Figure 3.**  $^1\text{H}$  NMR characterization of purified DKP 6 from NascA CDPS overexpression

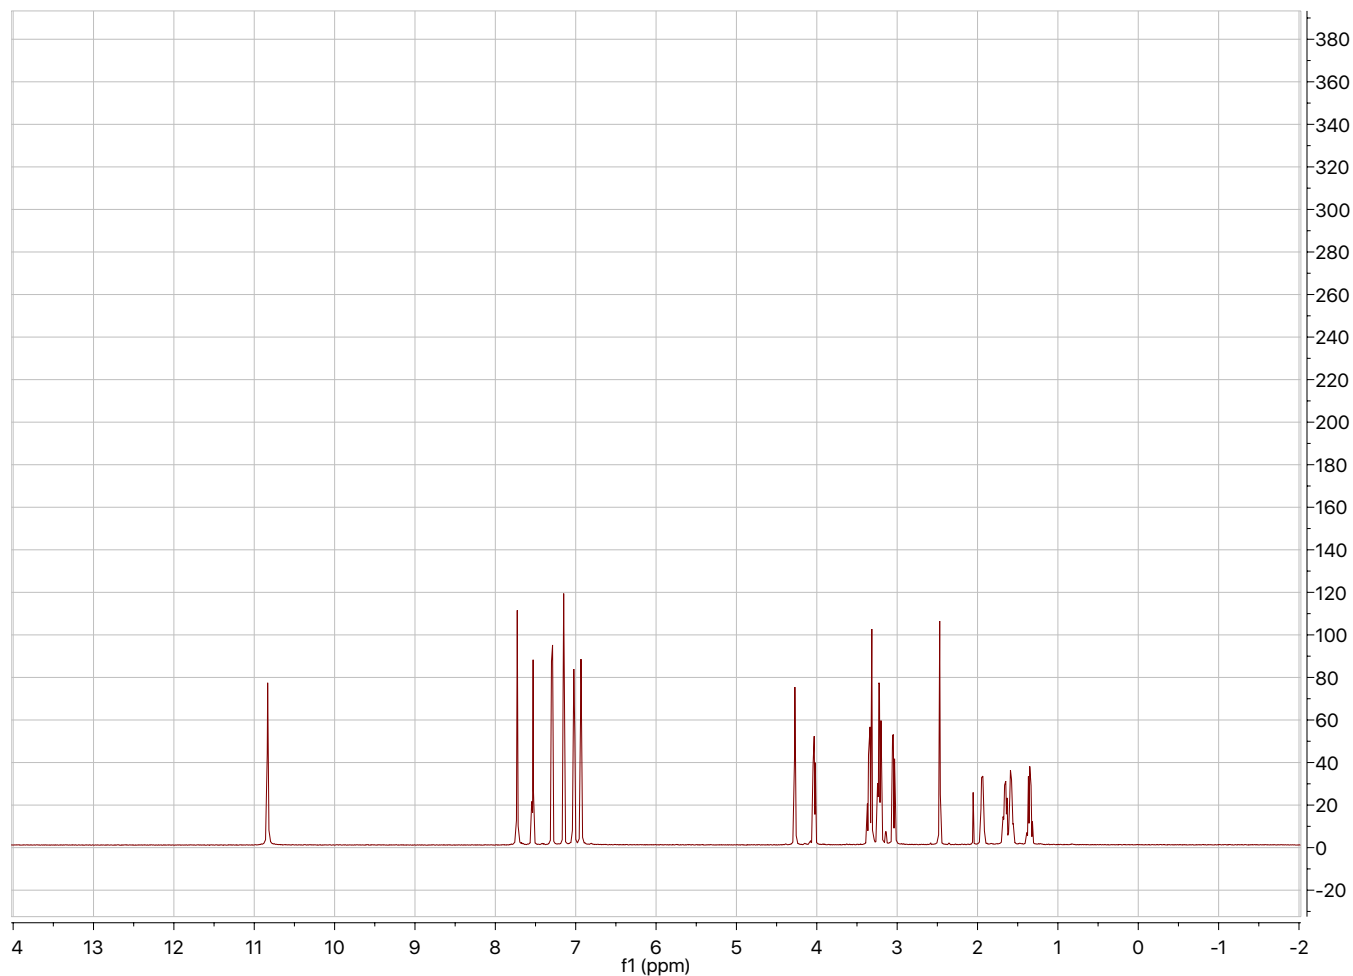

$^1\text{H}$  NMR (599 MHz,  $\text{DMSO-}d_6$ )  $\delta$  10.83 (s, 1H), 7.73 (s, 1H), 7.54 (d,  $J = 7.9$  Hz, 1H), 7.29 (d,  $J = 8.1$  Hz, 1H), 7.15 (d,  $J = 2.2$  Hz, 1H), 7.02 (t,  $J = 7.5$  Hz, 1H), 6.93 (t,  $J = 7.4$  Hz, 1H), 1.94 (dtd,  $J = 9.8, 6.9, 2.7$  Hz, 1H), 1.66 (ddd,  $J = 19.1, 9.1, 5.6$  Hz, 1H), 1.59 (ddp,  $J = 12.2, 8.4, 4.6, 4.1$  Hz, 1H), 1.35 (dtd,  $J = 12.1, 10.3, 7.8$  Hz, 1H).



**Supplementary Figure 4.**  $^{13}\text{C}$  NMR characterization of purified DKP 6 from NascA CDPS overexpression <sup>1</sup>

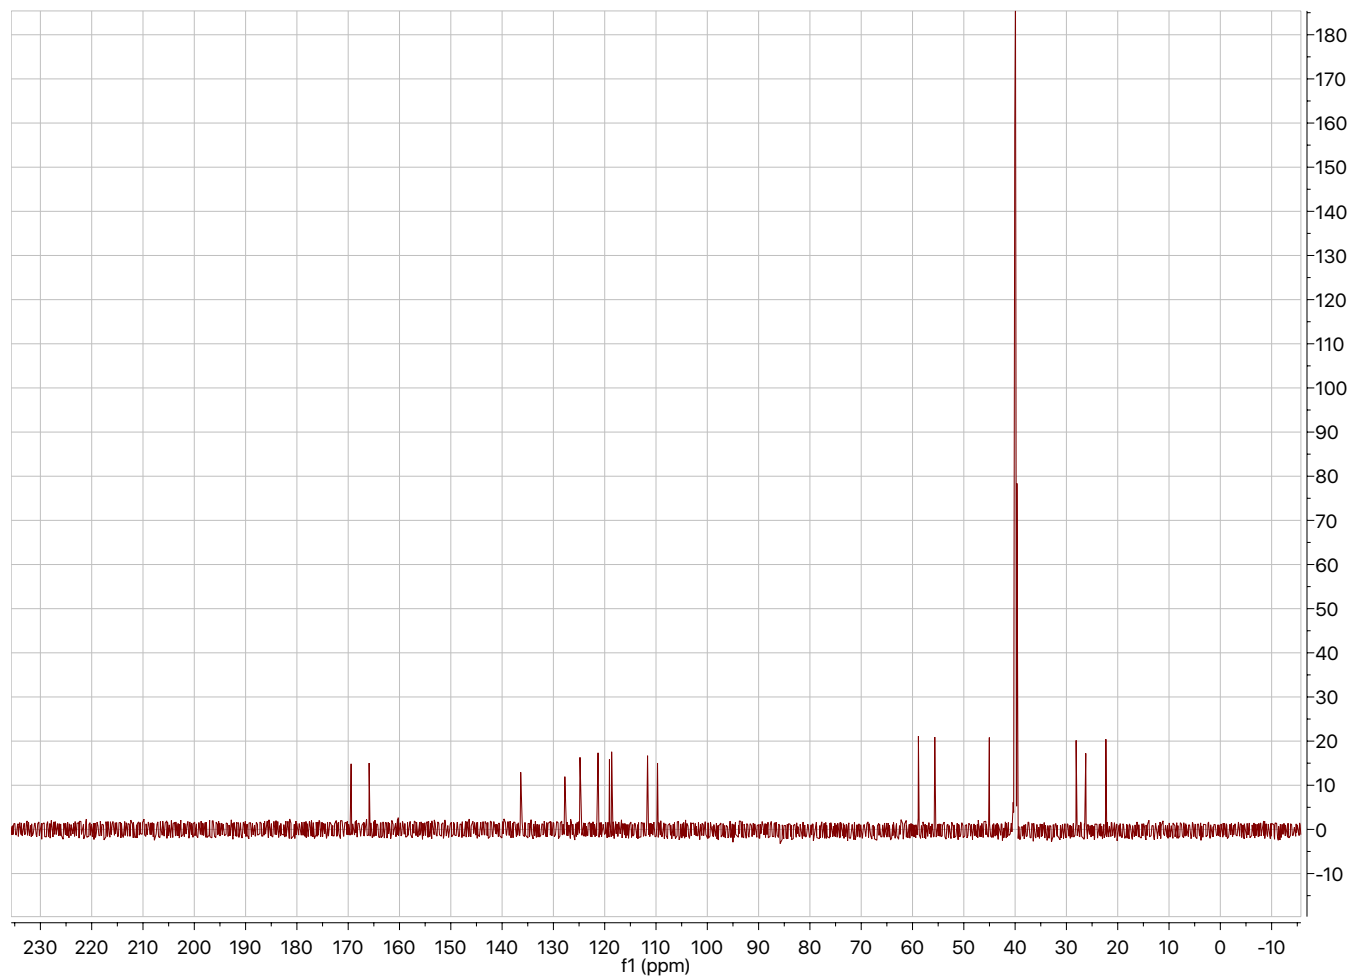

$^{13}\text{C}$  NMR (151 MHz, dmso)  $\delta$  169.43, 165.92, 136.37, 127.77, 124.82, 121.30, 119.08, 118.65, 111.65, 109.70, 58.85, 55.66, 45.03, 28.11, 26.23, 22.31.

# Supplementary Figure 5. HPLC/MS Analysis of Diketopiperazine SI-01 Isolated From CDPS Culture

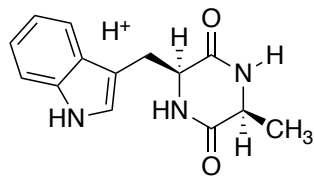

SI-01  
Exact Mass: 258.1237

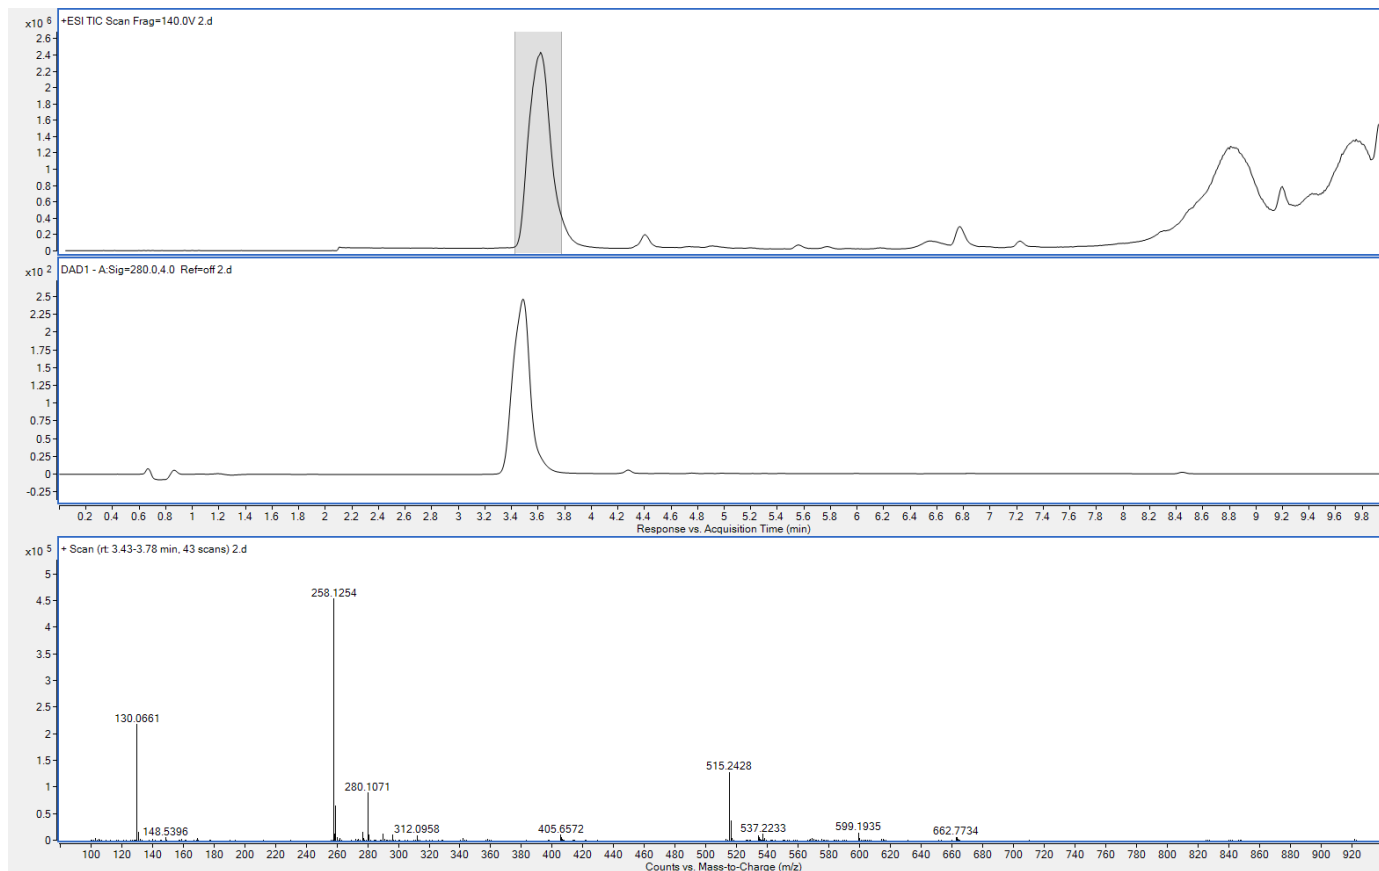

**Supplementary Figure 6.**  $^1\text{H}$  NMR characterization of purified DKP SI-01 from NznA expression.

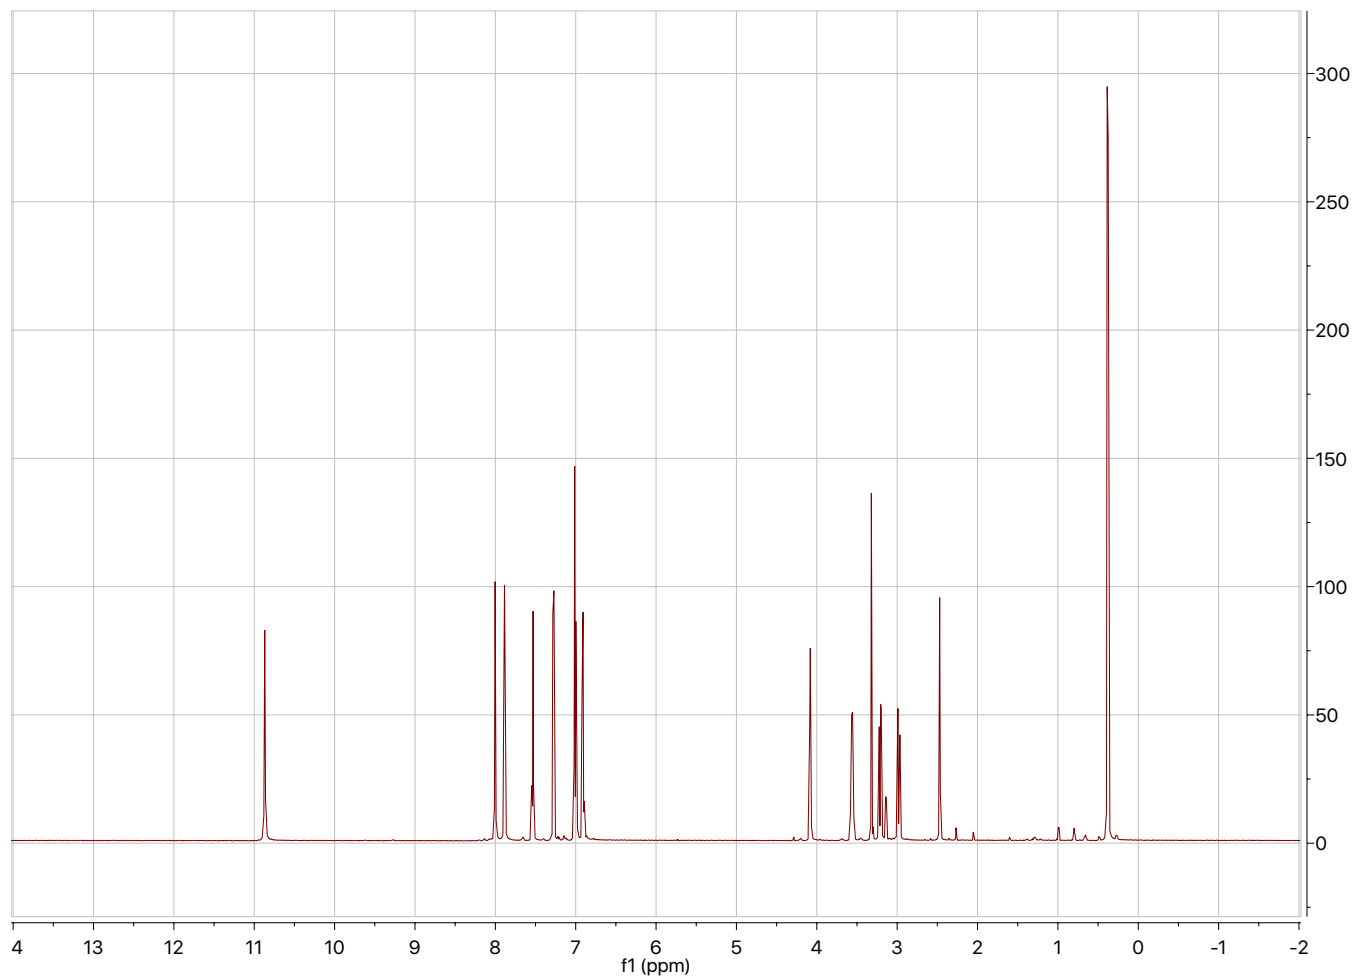

$^1\text{H}$  NMR (599 MHz,  $\text{DMSO-}d_6$ )  $\delta$  10.87 (s, 1H), 8.00 (s, 1H), 7.89 (s, 1H), 7.54 (d,  $J = 7.9$  Hz, 1H), 7.28 (d,  $J = 8.0$  Hz, 1H), 7.04 – 6.97 (m, 2H), 6.91 (t,  $J = 7.4$  Hz, 1H), 4.08 (d,  $J = 2.7$  Hz, 1H), 3.56 (dd,  $J = 7.0, 2.0$  Hz, 1H), 3.32 (s, 1H), 3.21 (dd,  $J = 14.4, 4.1$  Hz, 1H), 2.98 (dd,  $J = 14.4, 4.6$  Hz, 1H), 2.47 (t,  $J = 1.9$  Hz, 1H), 0.38 (d,  $J = 7.0$  Hz, 3H).

**Supplementary Figure 7.**  $^{13}\text{C}$  NMR characterization of purified DKP SI-01 from NznA expression.

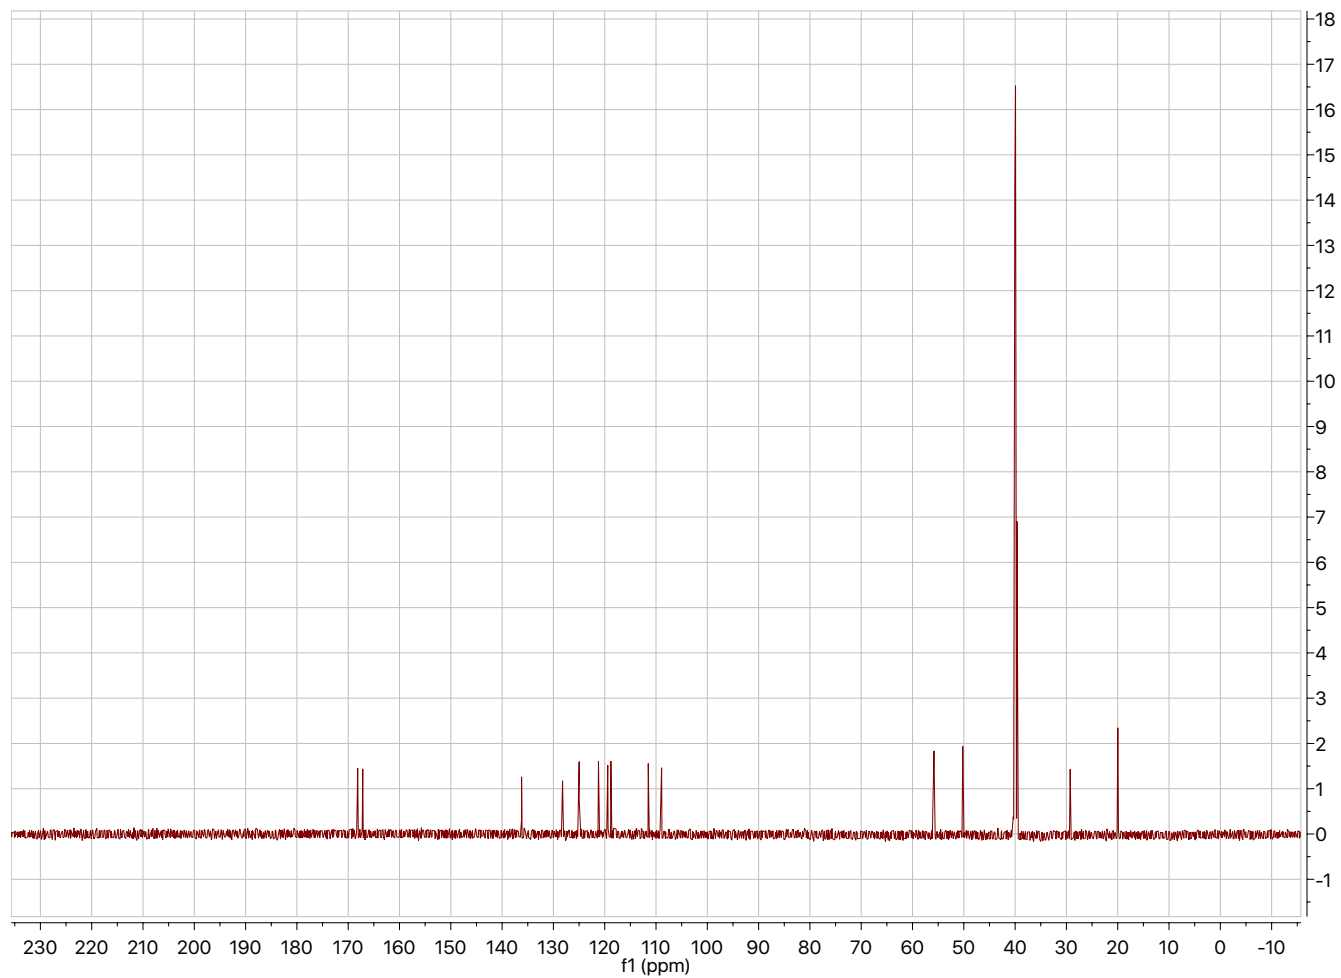

$^{13}\text{C}$  NMR (151 MHz, dmso)  $\delta$  168.14, 167.16, 136.20, 128.22, 124.98, 121.22, 119.40, 118.80, 111.51, 108.91, 55.82, 50.20, 29.27, 19.98.

**Supplementary Figure 8.** HPLC trace for NzeB CDPS overexpression

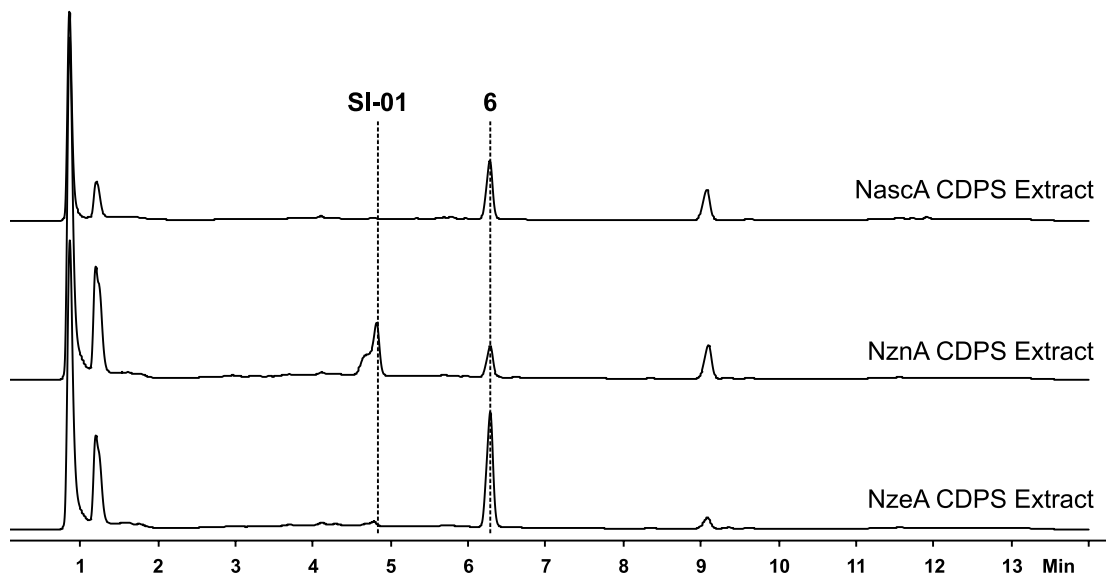

### **General procedure for overexpression, purification and spectral characterization of cytochrome P450s**

The expression of P450s was performed by transforming the plasmid into the competent cell *E. coli* strain C41(DE3) and selected on Luria-Bertani (LB) medium plates containing 50 µg/mL kanamycin. A single colony was grown overnight in LB broth containing the same concentration of the antibiotics. The main culture was prepared by inoculating 1% of each overnight culture into a 2 L baffled flask containing 500 ml of Terrific Broth (TB) containing 50 µg/mL kanamycin. The cultures were incubated at 37°C and 250 rpm for 3-4 h unless the absorbance  $A_{590nm} = 1$ . The expression was induced by the addition of 0.8 mM isopropyl β-D-1-thiogalactopyranoside (IPTG) and 1.0 mM delta-5-aminolevulinic acid (w/v). The cultures were incubated further for 36 h, 28°C at 160 rpm. Cells were harvested by centrifugation at 5000×g at 4°C for 10 min and the cell pellet was stored at –80°C until purification of the protein.

The cell pellet was resuspended in 5% culture volume of lysis buffer (50 mM Tris, pH 7.4 containing 50 mM NaCl, 2% glycerol, 0.5 mM EDTA, 10 mM beta-mercaptoethanol and 1mM phenylmethane sulfonyl fluoride (PMSF) and disrupted by sonication. The cell lysate was centrifugated (35,000 rpm for 35 min) and filtered (0.2 µM Millipore filter). The soluble His<sub>6</sub>-tagged NasB was purified by affinity chromatography using Ni-NTA (Qiagen) column and the collected fractions were analyzed by SDS-PAGE. The suitable red fractions were pooled and dialyzed at 4°C three times using 50 mM Tris, pH 7.4 containing 10% glycerol, 50 mM NaCl and 1 mM dithiothreitol (DTT) against a total of 6 L buffer.

### Supplementary Figure 9. UV-Visible spectra of NzeB

UV-Vis spectra for the purified NzeB was recorded at room temperature in buffer (50 mM Tris-HCl buffer, pH 7.4 containing 5% glycerol) was used for the spectral measurements of the oxidized and reduced form. NzeB was reduced by the addition of a small amount of sodium dithionite. The concentration of the P450s was estimated by CO-difference spectra, assuming  $\epsilon(459-490) = 91 \text{ mM}^{-1} \text{ cm}^{-1}$  according to the method of Omura and Sato .

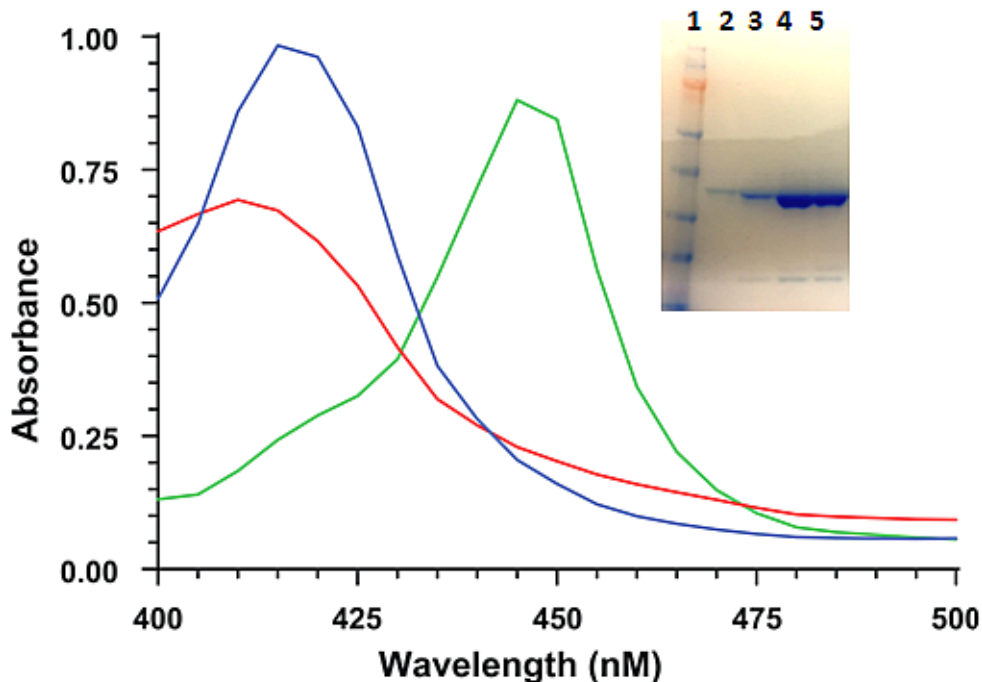

The UV-Vis spectra of oxidized (blue line), sodium dithionite reduced (red line) and CO-bound (green line) of purified NzeB are shown. The inset showed the SDS-PAGE of NzeB purification, Lane 1: marker (SeeBlue Plus2, Novex), 2-5: purified NzeB fractions

**Supplementary Figure 10.** Spin shift titrations with NzeB and brevianamide F (**6**)

The spin-state shift caused by binding of **6** with NzeB was assayed at room temperature under aerobic conditions using an UV-Vis spectrophotometer. The high-spin spectrum of NzeB (5  $\mu\text{M}$ ) was obtained by adding 10 to 100  $\mu\text{M}$  of **6**.

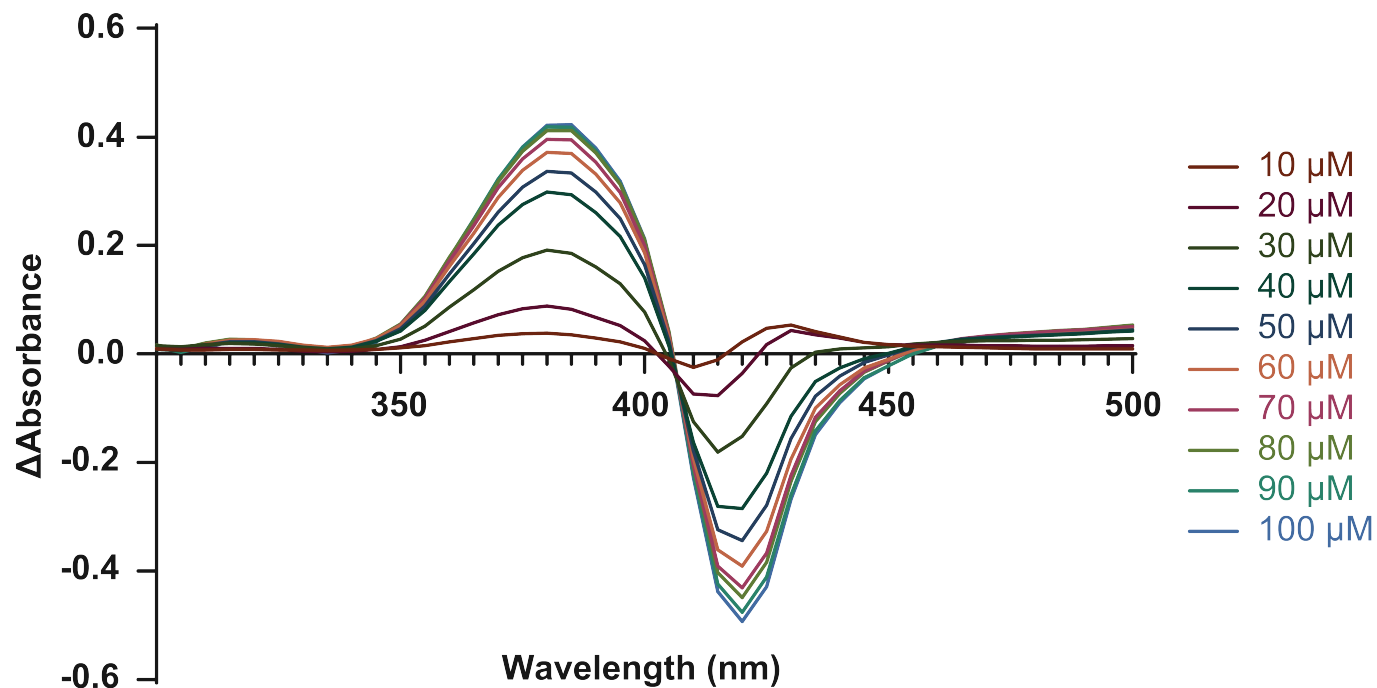

The overlaid difference spectra obtained by subtracting the spectrum for ligand-free NzeB from the successive spectra for substrate-bound accumulated during the titration between 10 and 100  $\mu\text{M}$  **6** are shown. The Soret band maximum is gradually shifted from 417 nm to 393 nm during the addition of increasing concentrations of **6**.



### General reaction conditions for analytical scale P450 reactions

The conversion of DKPs by P450s were carried out with the heterologous redox electron partners Fdx and FdR from *S. olerecea*. A protein ratio of P450: Fdx: FdR of 10: 20: 6 was used. The *in vitro* reaction mixture included 50 mM Tris-HCl, pH 7.4, 10  $\mu$ M P450, 20  $\mu$ M Fdx and 6  $\mu$ M FdR at the end volume of 250  $\mu$ L. 3mM of DKP dissolved in DMSO was added, followed by 1 unit of glucose-6-phosphate dehydrogenase (from *S. cerevisiae* and a 500 mM glucose-6-phosphate. The reaction was initiated by adding NADPH (1 mM). Two of the control reactions including all the contents except for NADPH or P450 were used as controls. The reaction was incubated at 30°C for 1 h agitating at 600 rpm in a thermoshaker (Multi-thermoshaker, Benchmark). The conversion was stopped by adding an equal volume of chloroform and was extracted with chloroform for 3 times. The samples were dried under a stream of nitrogen and the residue was resuspended in 100  $\mu$ L of HPLC grade methanol and analyzed by HPLC in which the reaction mixture was resolved using a linear gradient of 5-100% acetonitrile: water (0.1% formic acid) over 30 min (1.5 mL/min flow rate) on a Phenomenex Luna 5 $\mu$  C-18(2) 100A, 250  $\times$  4.60mm 5 micron column.

### General reaction conditions for preparatory scale P450 reactions

Large scale reaction were performed in 10mL volumes with reaction conditions as described above. After 2 hours, reactions were quenched with 30mL of methanol, transferred to a 50mL conical tube and vortexed on the highest setting for 1 minute. This mixture was then passed through a column of Celite © followed by 20mL of methanol to wash the filter cake. Water and solvents were removed *en vacuo*, and residue was resuspended in HPLC grade methanol with sonication. Insoluble particulates were removed via filtration through 0.2 $\mu$ m syringe filter and products were directly purified by preparatory-HPLC.

### Prep-Scale Synthesis of (-)-naseseazine C (4)

Procedure above was followed with DKP **6**, as a substrate and NascB as P450. The filtered solution was then purified via preparative HPLC (Luna preparative HPLC column, C18, 5  $\mu$ m, 21.2  $\times$  250 mm;) using gradient of 5% to 100% acetonitrile in water containing 0.1% formic acid at the flow of 7.0 mL/min for 60 min. The retention time ( $t_R$ ) of **4** was 31.2 min. The product fractions were pooled, solvent was removed *en vacuo*, to give 8 mg of (-)-naseseazine C which was used for detailed NMR characterization without any further purification.

### Prep-Scale Synthesis of (+)-naseseazine B (2)

Procedure above was followed with DKP **6**, as a substrate and NznB+09 as P450. The filtered solution was then purified via preparative HPLC (Luna preparative HPLC column, C18, 5  $\mu$ m, 21.2  $\times$  250 mm;) using gradient of 5% to 100% acetonitrile in water containing 0.1% formic acid at the flow of 7.0 mL/min for 60 min. The retention time ( $t_R$ ) of **2** was 34.1 min. The product fractions were pooled, solvent was removed *en vacuo*, to give 11 mg of (+)-naseseazine B which was used for detailed NMR characterization without any further purification.

### Prep-Scale Synthesis of (-)-aspergilazine A (5)

Procedure above was followed with DKP **6**, as a substrate and NzeB as P450. The filtered solution was then purified via preparative HPLC (Luna preparative HPLC column, C18, 5  $\mu$ m, 21.2  $\times$  250 mm;) using gradient of 5% to 100% acetonitrile in water containing 0.1% formic acid at the flow of 7.0 mL/min for 60 min. The retention time ( $t_R$ ) of **5** was 36.6 min. The product fractions were pooled, solvent was removed *en vacuo*, to give 2 mg of (+)-naseseazine B, 6 mg of (-)-naseseazine C, and 3 mg of (-)-aspergilazine A which was used for detailed NMR characterization without any further purification.

### Prep-Scale Synthesis of 18

Procedure above was followed with DKPs **6** and **17**, as a substrates and NzeB as P450. The filtered solution was then purified via preparative HPLC (Luna preparative HPLC column, C18, 5  $\mu$ m, 21.2  $\times$  250 mm;) using gradient of 5% to 100% acetonitrile in water containing 0.1% formic acid at the flow of 7.0 mL/min for 60 min. The retention time ( $t_R$ ) of **18** was 42.1 min. The product fractions were pooled, solvent was removed *en vacuo*, to give approximately 1 mg of **18** which was used for detailed NMR characterization without any further purification.

**Supplementary Figure 11.** HPLC/MS traces with extraction ion chromatograms (EIC) for analytical scale heterodimerization of SI-01 and DKP 6 to form (–)-nasezeazine A catalyzed by NznB.

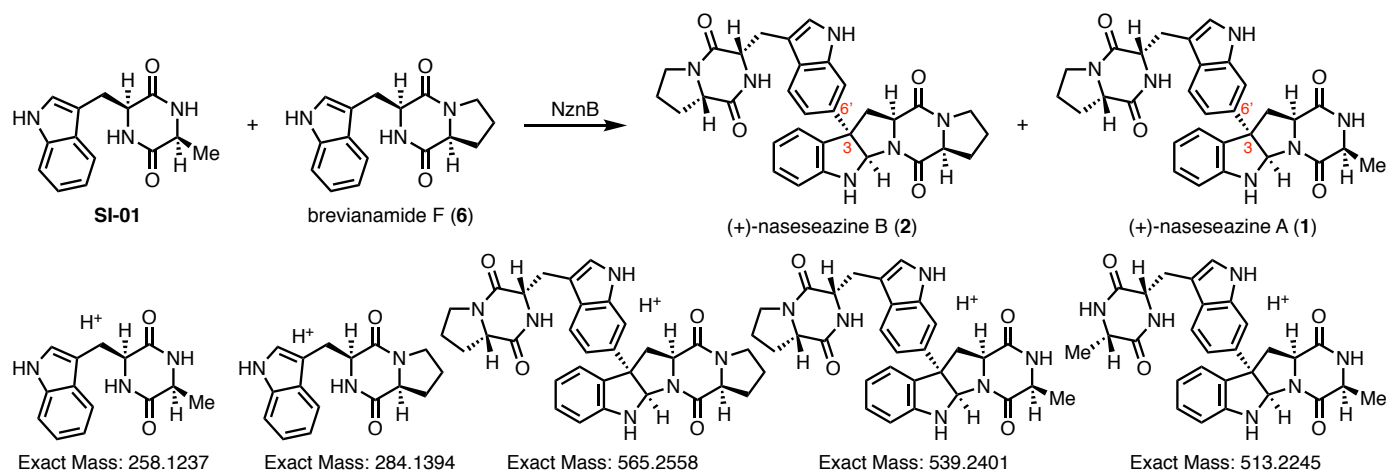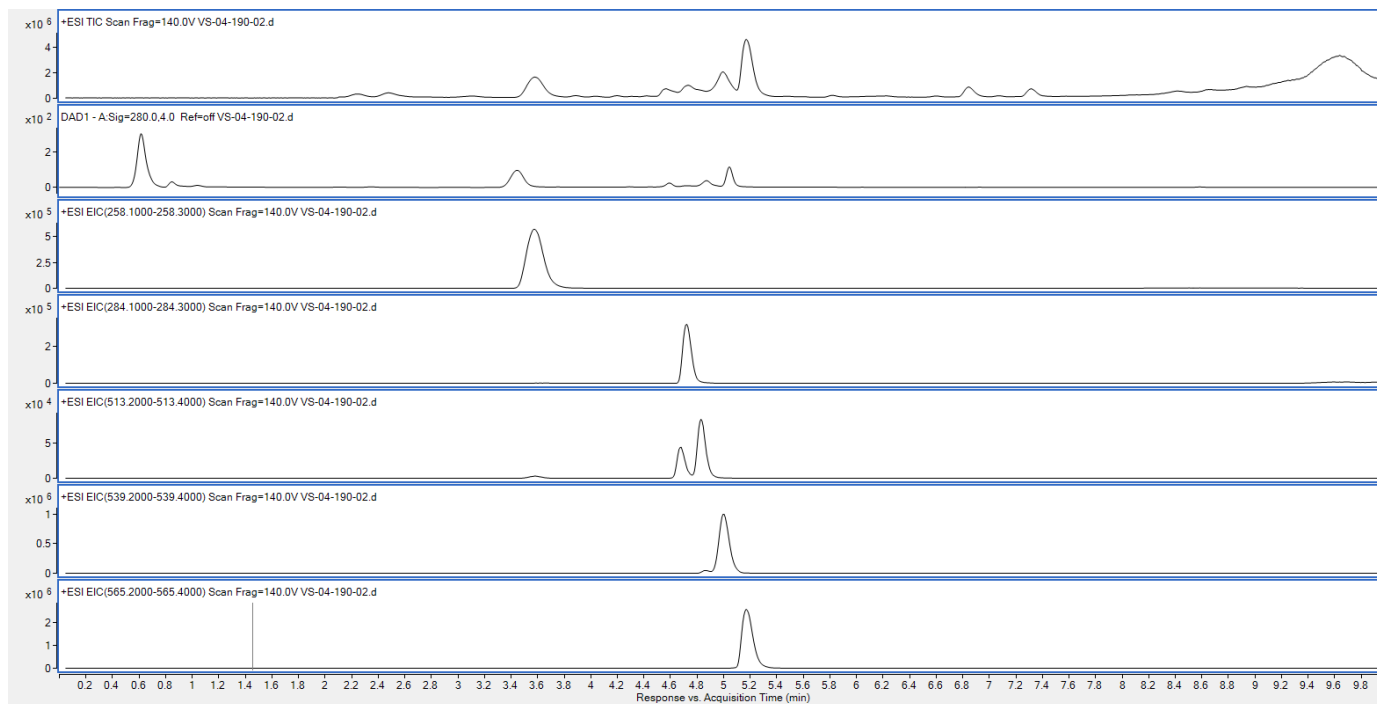

**Supplementary Figure 12.** HPLC traces from NzeB catalyzed heterodimerizations.

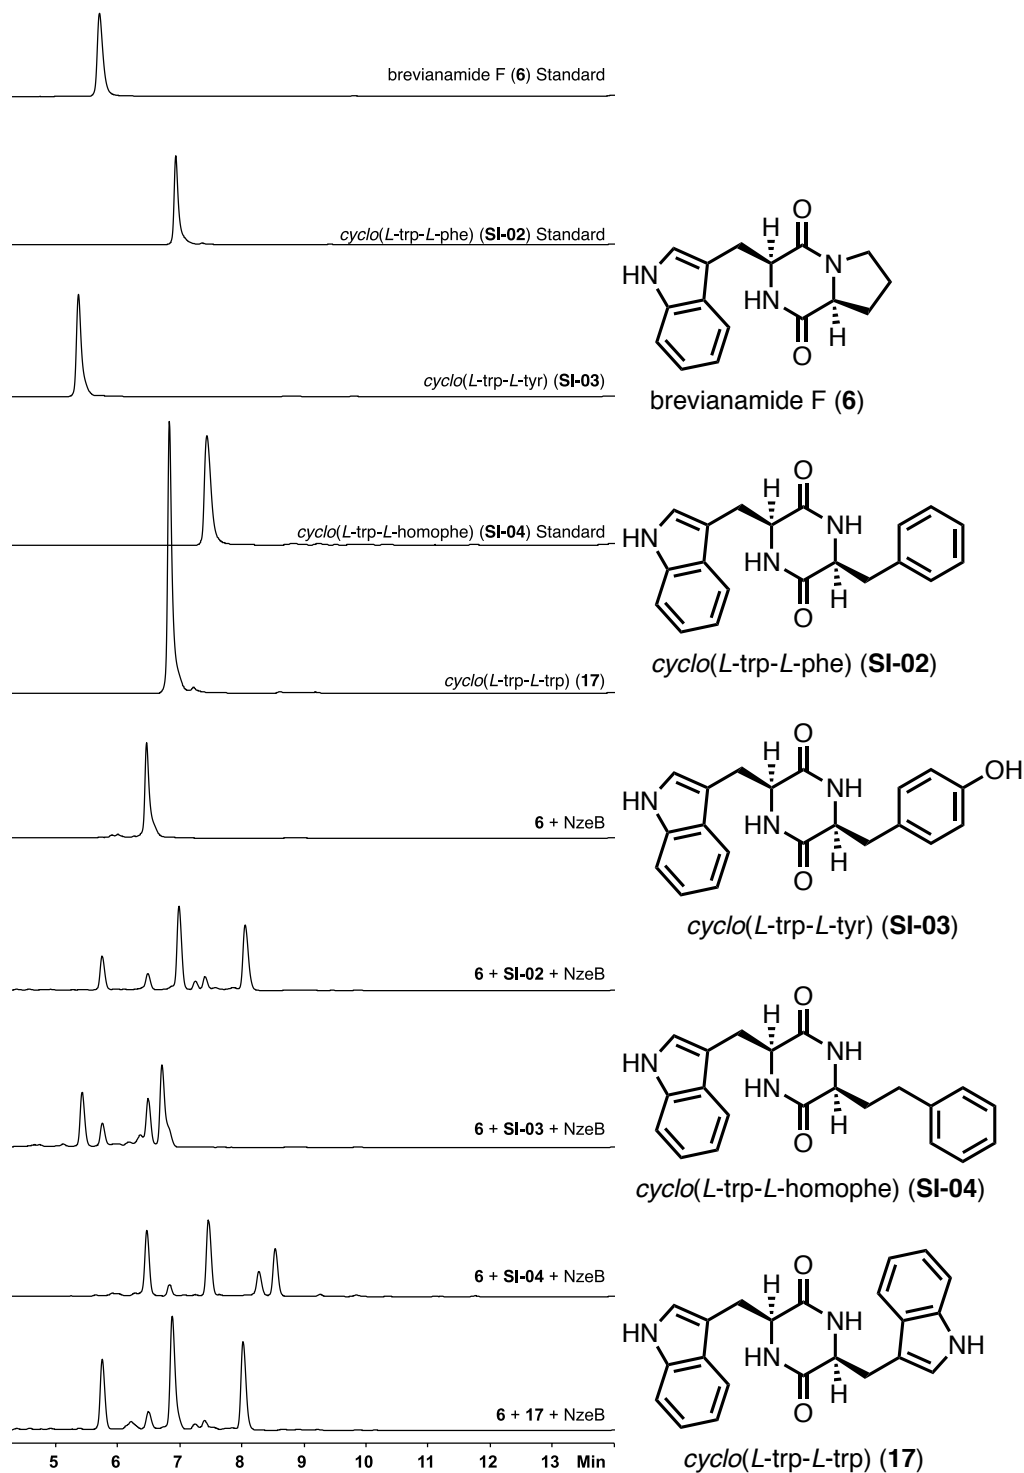

All heterodimerizations of DKP **6** with DKPS **SI-02-SI-04** show formation of (–)-nasezeazine C (**4**) with the heterodimerization of **6** with *cyclo(L-Trp-L-Trp)* (**17**) giving the least formation of **4**.

Supplementary Figure 13. HPLC traces from NzeB alanine scanning mutants.

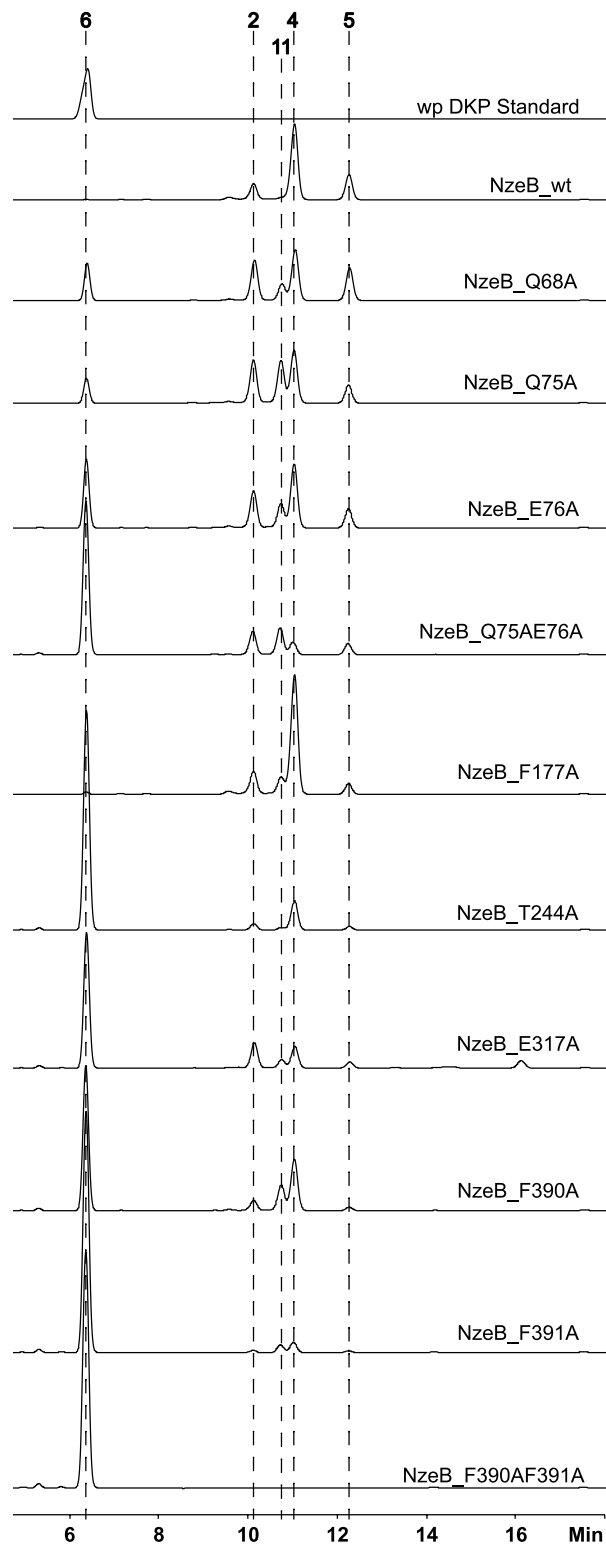

**Supplementary Figure 14.**  $^1\text{H}$  NMR spectra for isolated (–)-aspergilazine A (5) from NzeB scale up reaction

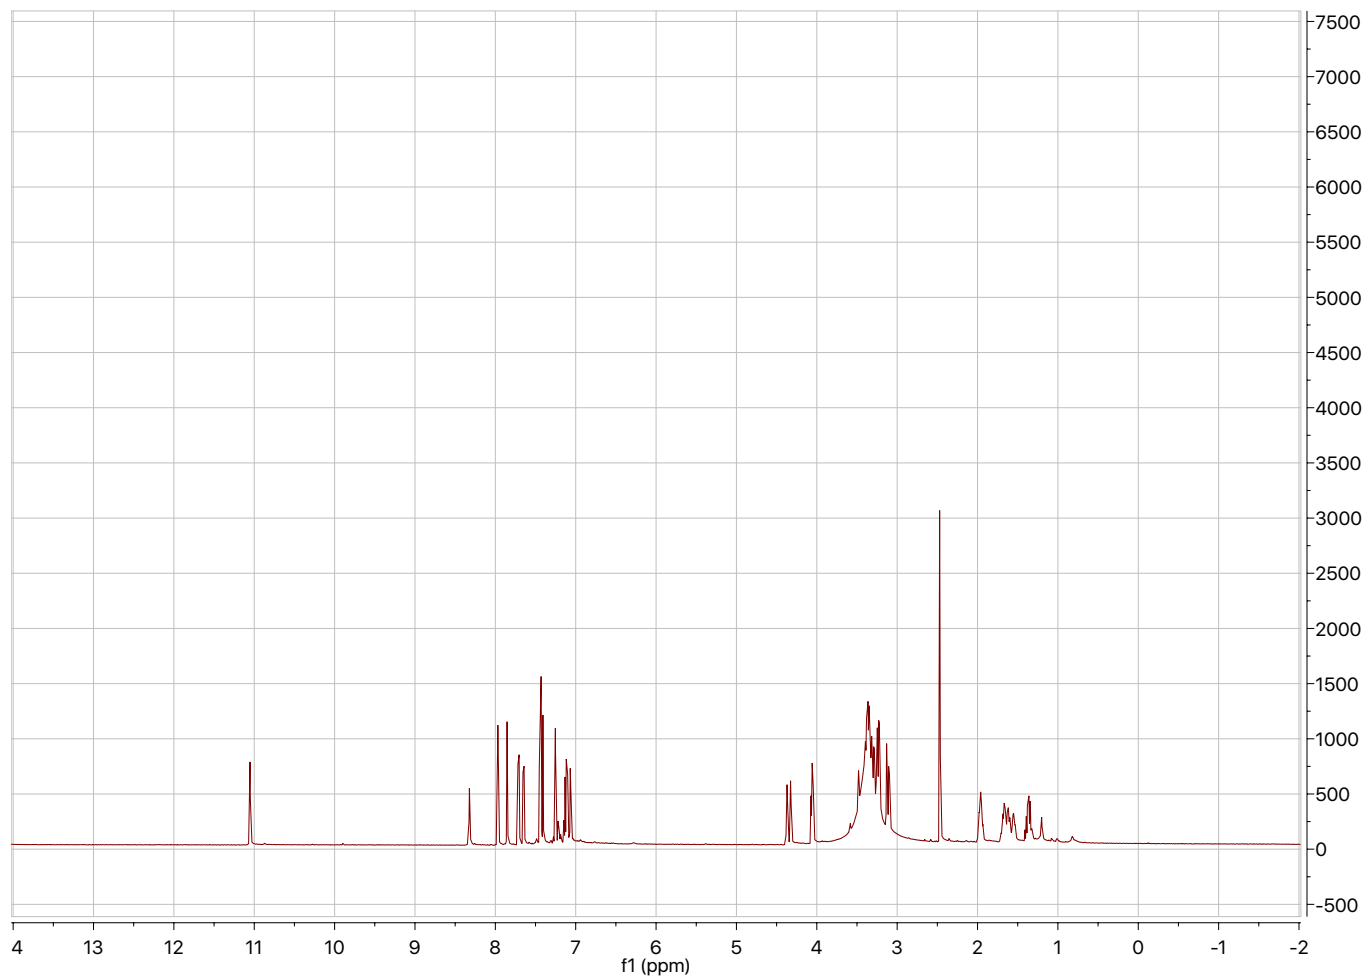

$^1\text{H}$  NMR (599 MHz,  $\text{DMSO-}d_6$ )  $\delta$  11.05 (s, 1H), 7.97 (s, 1H), 7.85 (s, 1H), 7.71 (d,  $J = 8.3$  Hz, 1H), 7.65 (d,  $J = 7.8$  Hz, 1H), 7.45 (d,  $J = 8.2$  Hz, 1H), 7.43 (s, 1H), 7.41 (d,  $J = 1.9$  Hz, 1H), 7.25 (d,  $J = 2.4$  Hz, 1H), 7.15 – 7.12 (m, 1H), 7.10 (d,  $J = 2.0$  Hz, 1H), 7.07 (t,  $J = 7.4$  Hz, 1H), 4.37 (t,  $J = 5.4$  Hz, 1H), 4.33 (t,  $J = 5.3$  Hz, 1H), 4.09 – 4.03 (m, 2H), 3.35 (tdd,  $J = 19.4, 9.6, 6.3$  Hz, 3H), 3.30 – 3.20 (m, 3H), 3.15 – 3.09 (m, 2H), 1.96 (dtt,  $J = 14.0, 6.9, 3.5$  Hz, 2H), 1.75 – 1.51 (m, 4H), 1.36 (ddtd,  $J = 18.1, 12.4, 10.2, 7.8$  Hz, 2H).

**Supplementary Figure 15.**  $^{13}\text{C}$  NMR spectra for isolated (–)-aspergilazine A (5) from NzeB scale up reaction

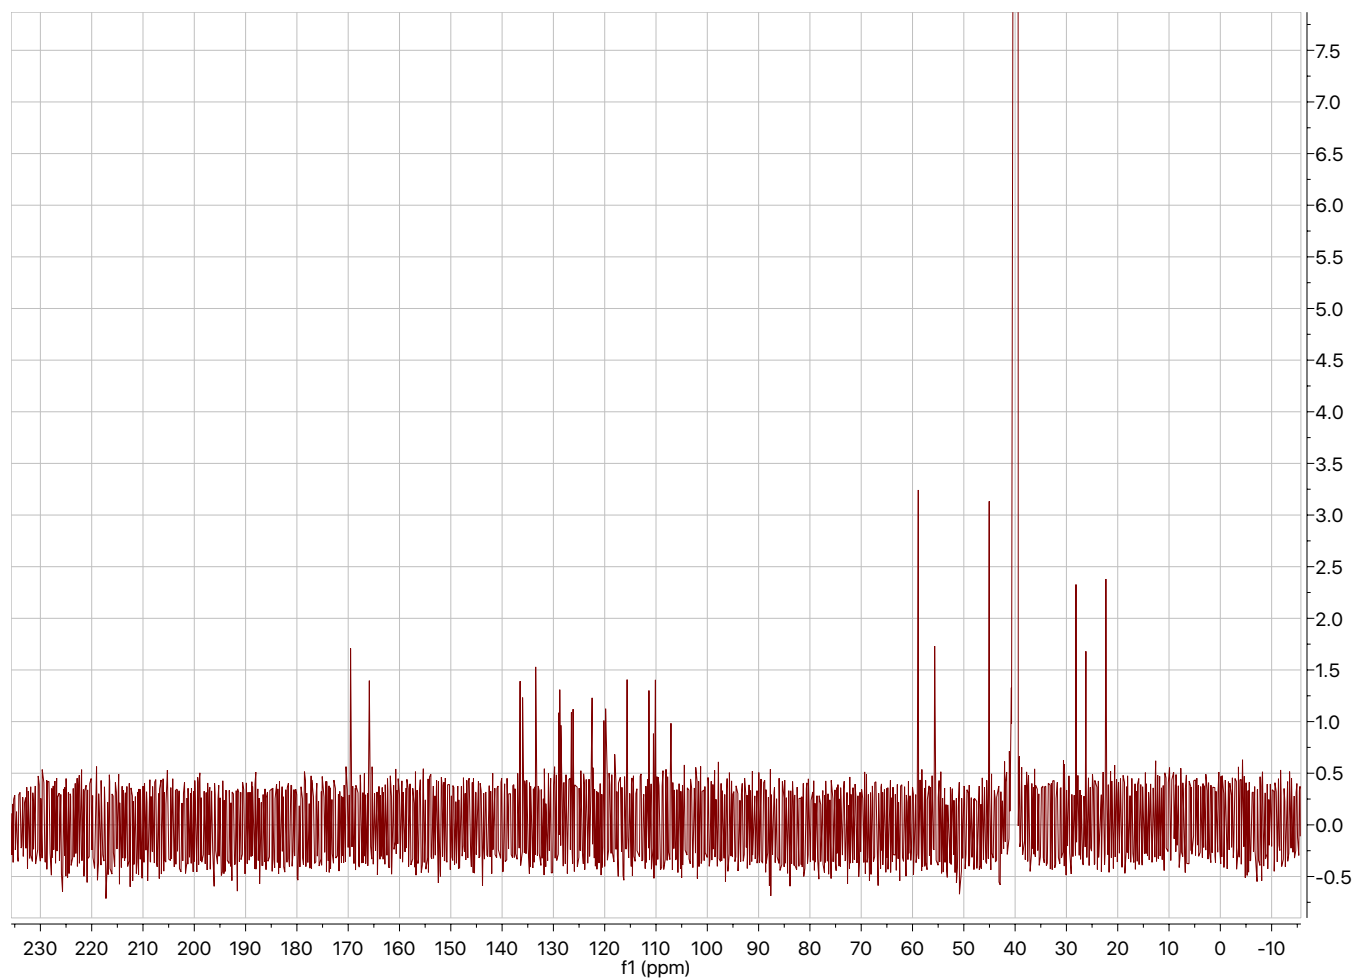

$^{13}\text{C}$  NMR (151 MHz, DMSO- $d_6$ )  $\delta$  169.54, 169.47, 165.88, 165.84, 136.49, 136.01, 133.45, 128.94, 128.76, 128.54, 126.49, 126.17, 122.45, 119.82, 115.63, 111.38, 110.12, 107.09, 58.88, 55.68, 55.59, 45.05, 28.14, 26.20, 22.31, 22.28.

Supplementary Figure 16.  $^1\text{H}$  NMR spectra for **18** isolated from NzeB scale up

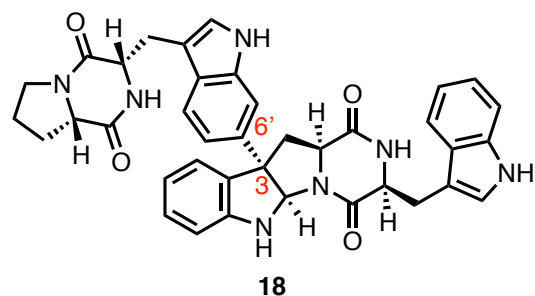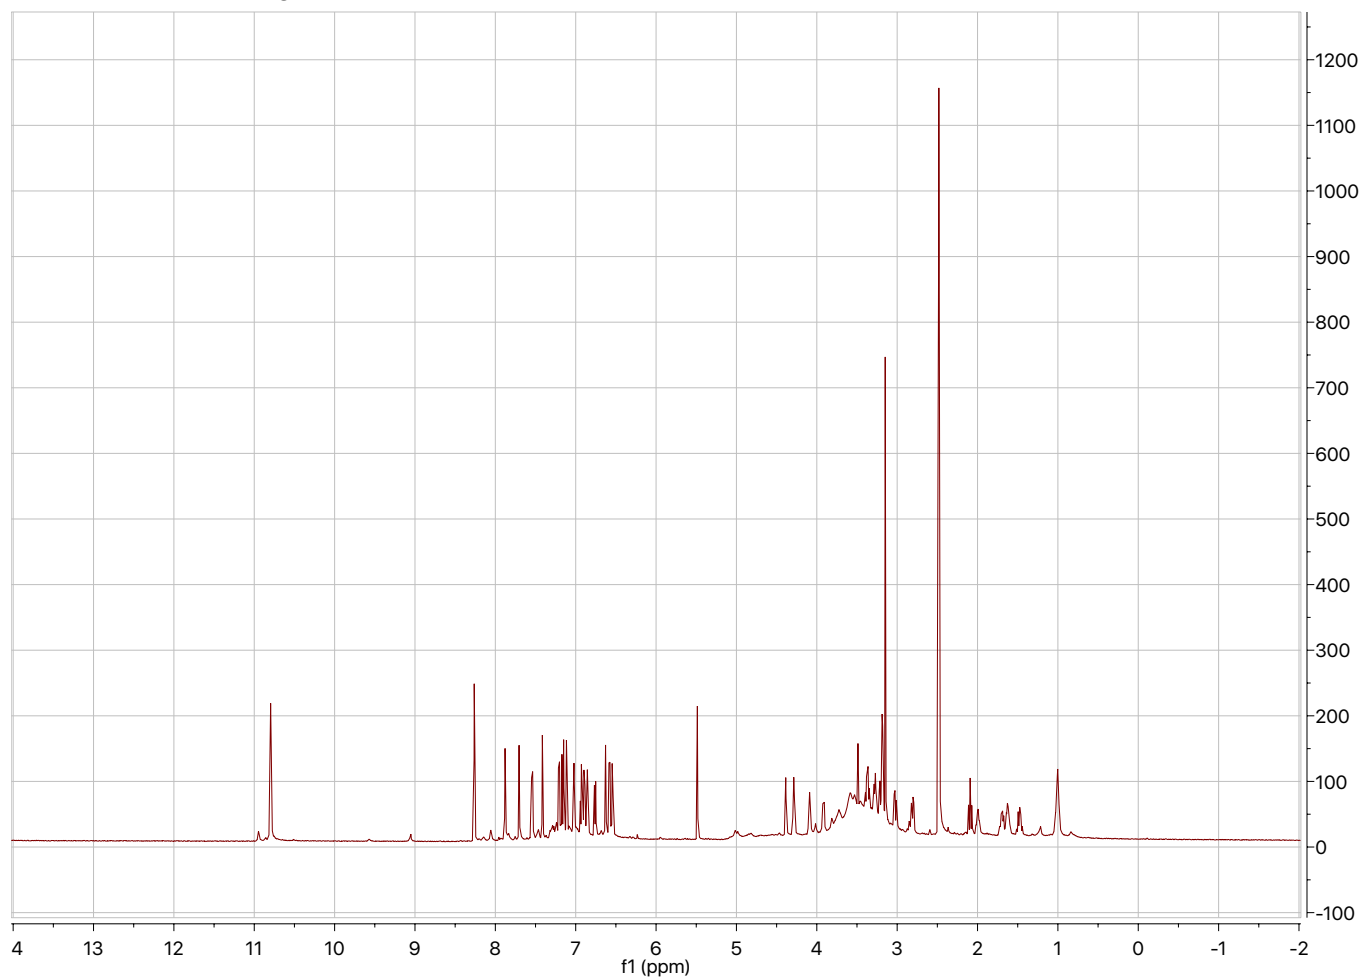

$^1\text{H}$  NMR (599 MHz,  $\text{DMSO-}d_6$ )  $\delta$  10.80 (s, 2H), 8.26 (s, 1H), 7.88 (s, 1H), 7.70 (s, 1H), 7.54 (d,  $J = 7.8$  Hz, 1H), 7.41 (s, 1H), 7.19 (dd,  $J = 17.9, 8.2$  Hz, 2H), 7.15 (d,  $J = 2.2$  Hz, 1H), 7.12 (d,  $J = 2.3$  Hz, 1H), 7.03 (d,  $J = 7.4$  Hz, 1H), 6.93 (t,  $J = 7.6$  Hz, 1H), 6.90 (t,  $J = 7.5$  Hz, 1H), 6.86 (t,  $J = 7.4$  Hz, 1H), 6.76 (dd,  $J = 8.5, 1.7$  Hz, 1H), 6.63 (s, 1H), 6.58 (d,  $J = 7.8$  Hz, 1H), 6.55 (t,  $J = 7.4$  Hz, 1H), 5.49 (s, 1H), 4.38 (d,  $J = 5.1$  Hz, 1H), 4.29 (t,  $J = 5.5$  Hz, 1H), 4.12 – 4.06 (m, 1H), 3.92 (dd,  $J = 11.8, 5.5$  Hz, 1H), 3.37 (dt,  $J = 11.7, 7.9$  Hz, 1H), 3.27 (ddd,  $J = 12.2, 8.8, 3.9$  Hz, 1H), 3.23 – 3.17 (m, 3H), 3.02 (dd,  $J = 15.0, 6.0$  Hz, 1H), 2.81 (dd,  $J = 12.2, 5.6$  Hz, 1H), 2.09 (t,  $J = 11.9$  Hz, 1H), 2.04 – 1.95 (m, 1H), 1.73 – 1.58 (m, 2H), 1.53 – 1.42 (m, 1H).



Supplementary Figure 17.  $^{13}\text{C}$  NMR spectra for **18** isolated from NzeB scale up

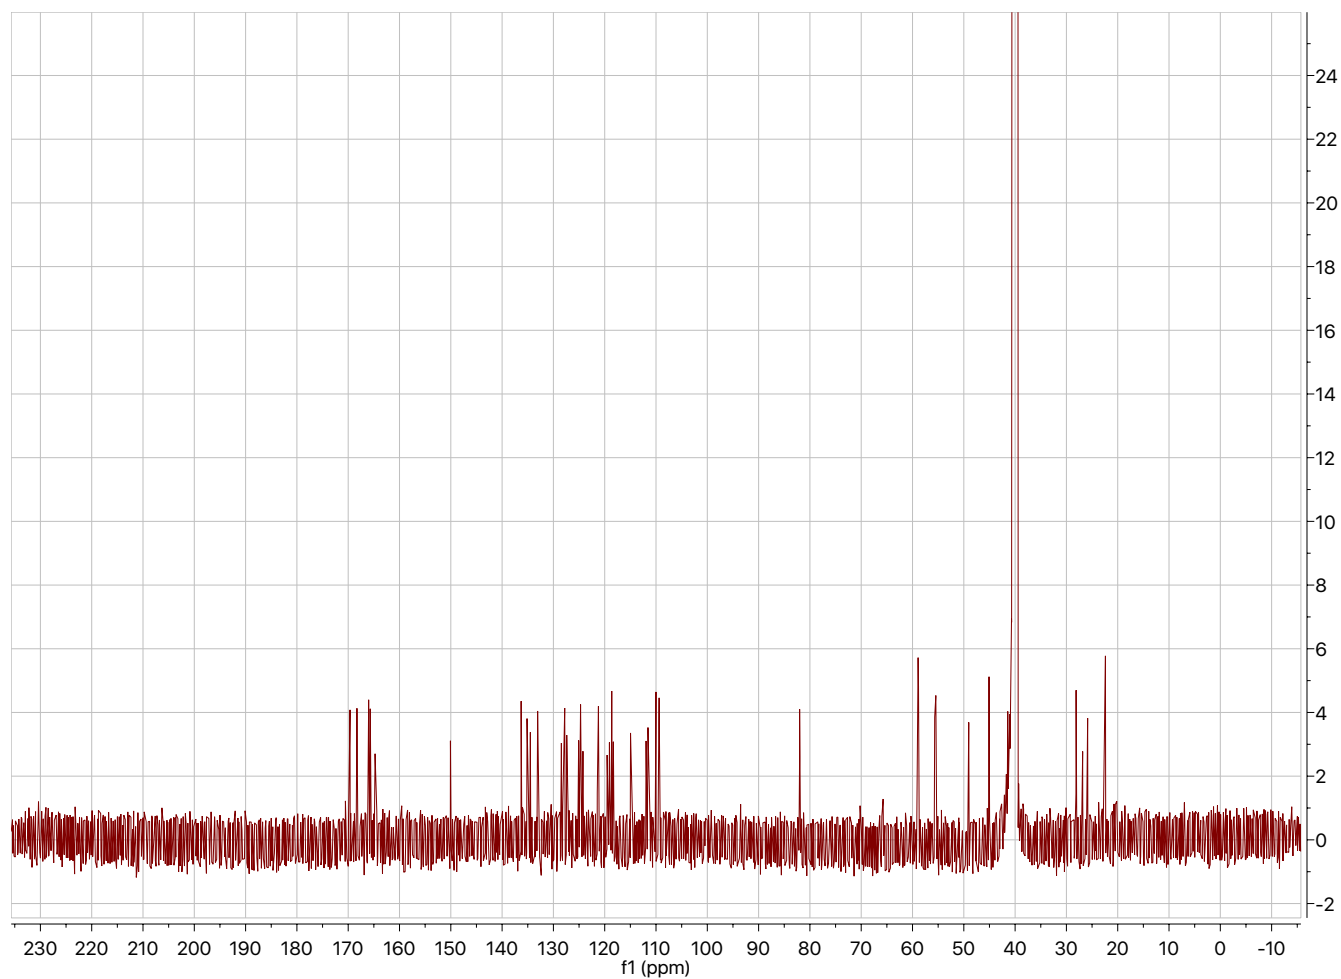

$^{13}\text{C}$  NMR (151 MHz, dmsol)  $\delta$  169.64, 168.30, 166.01, 165.70, 164.76, 150.07, 136.29, 135.14, 134.50, 133.07, 128.45, 127.79, 127.40, 125.08, 124.71, 124.24, 121.22, 119.53, 119.08, 118.63, 118.31, 114.97, 111.94, 111.57, 110.00, 109.45, 109.39, 82.00, 59.02, 58.91, 58.83, 55.68, 55.45, 49.04, 45.09, 41.43, 28.11, 26.83, 25.86, 22.40.

Supplementary Figure 18. gHSQCAD spectra for **18** isolated from NzeB scale up

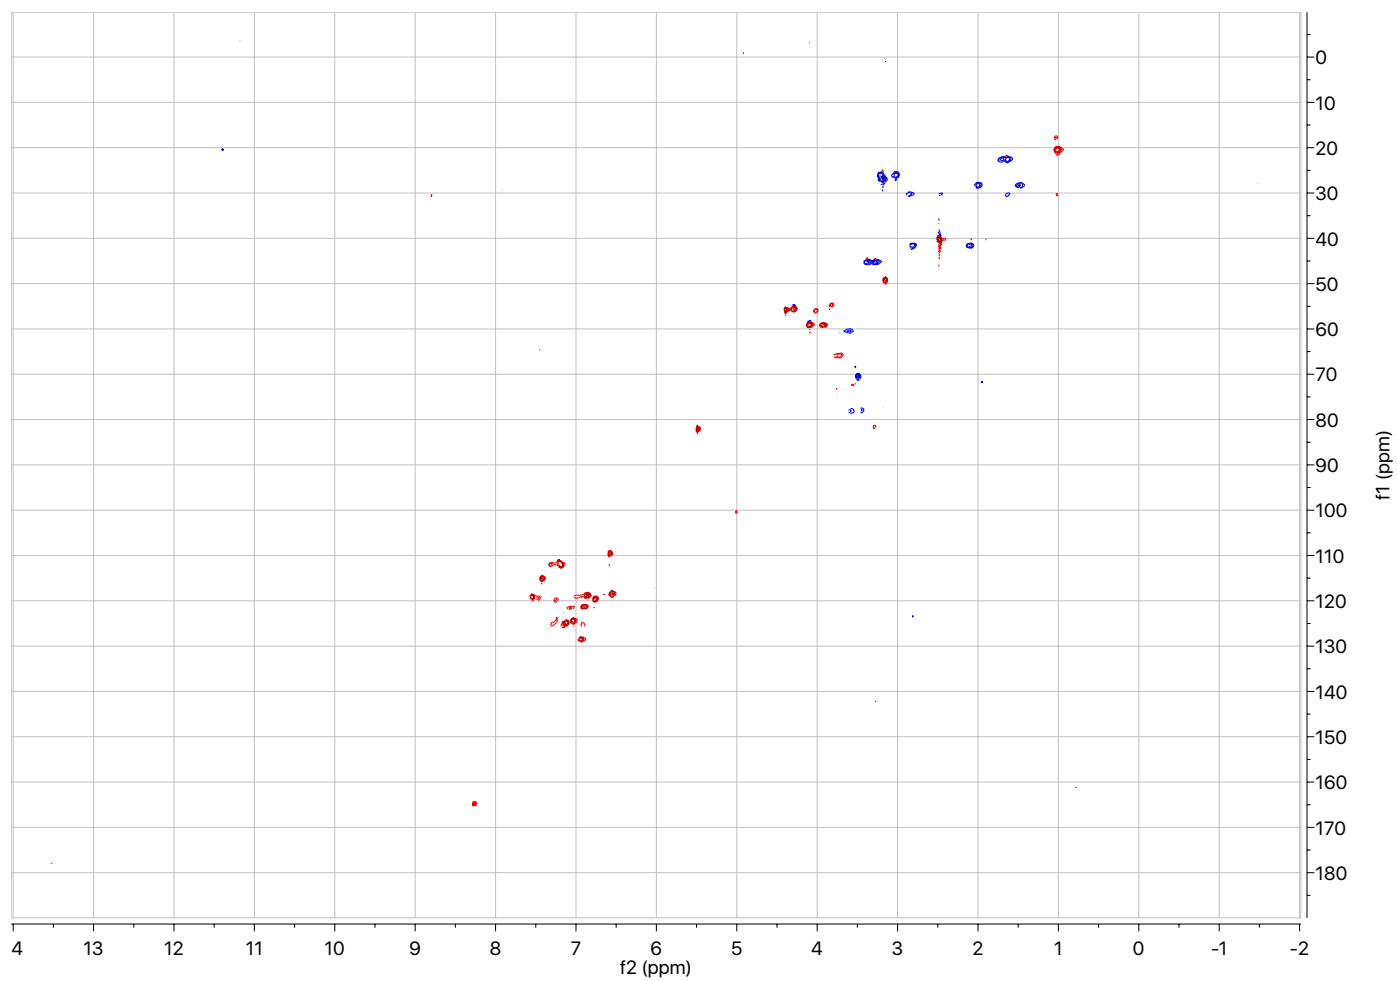

Supplementary Figure 19. gHMBCAD spectra for **18** isolated from NzeB scale up

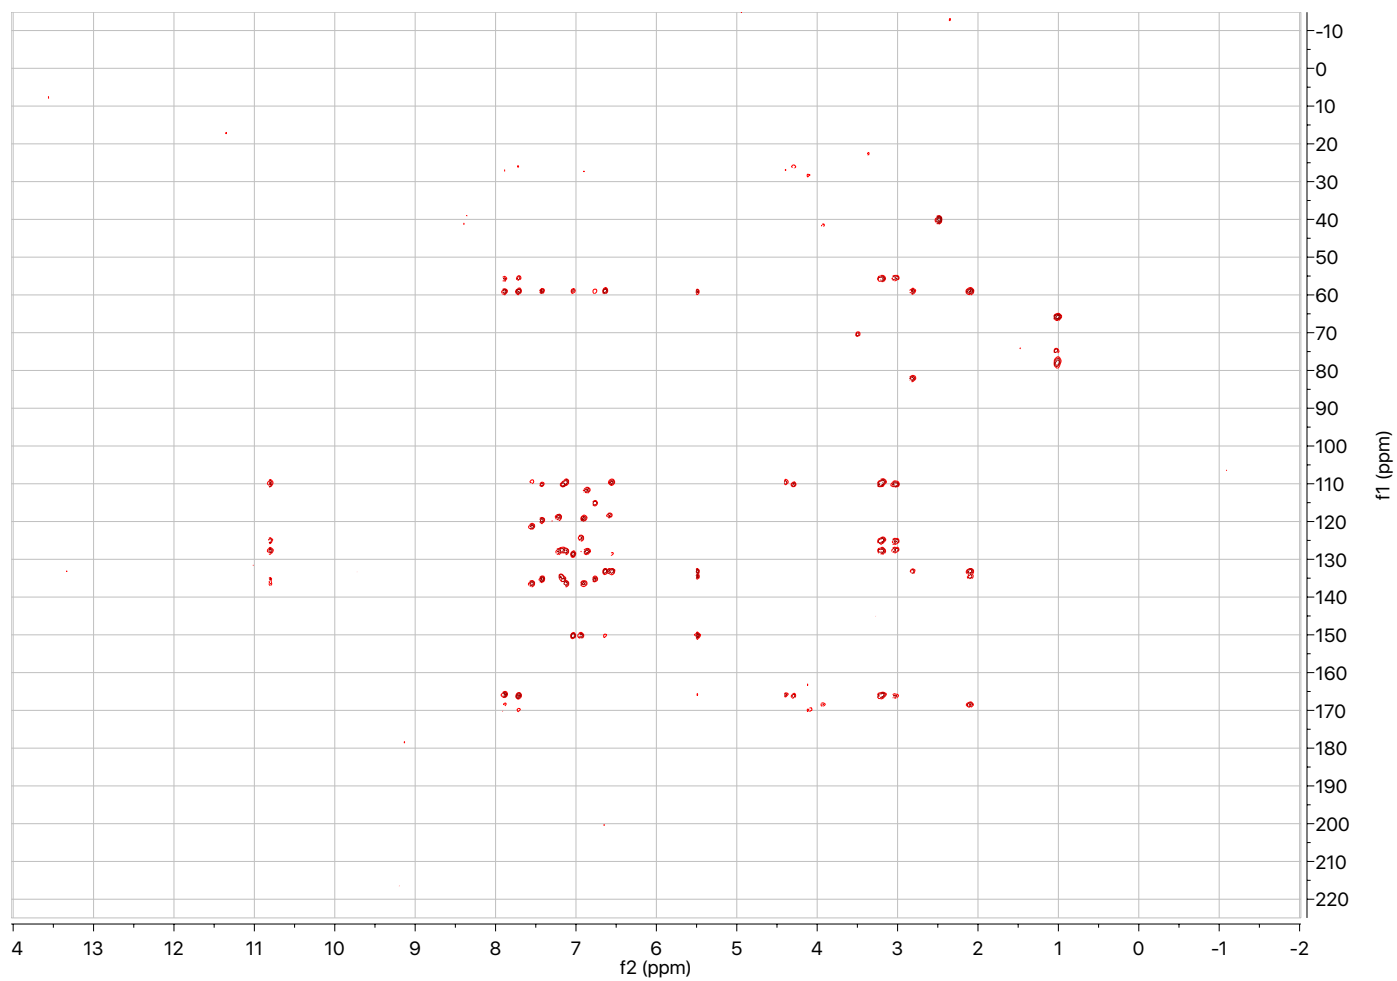

Supplementary Figure 20. gCOSY spectra for **18** isolated from NzeB scale up

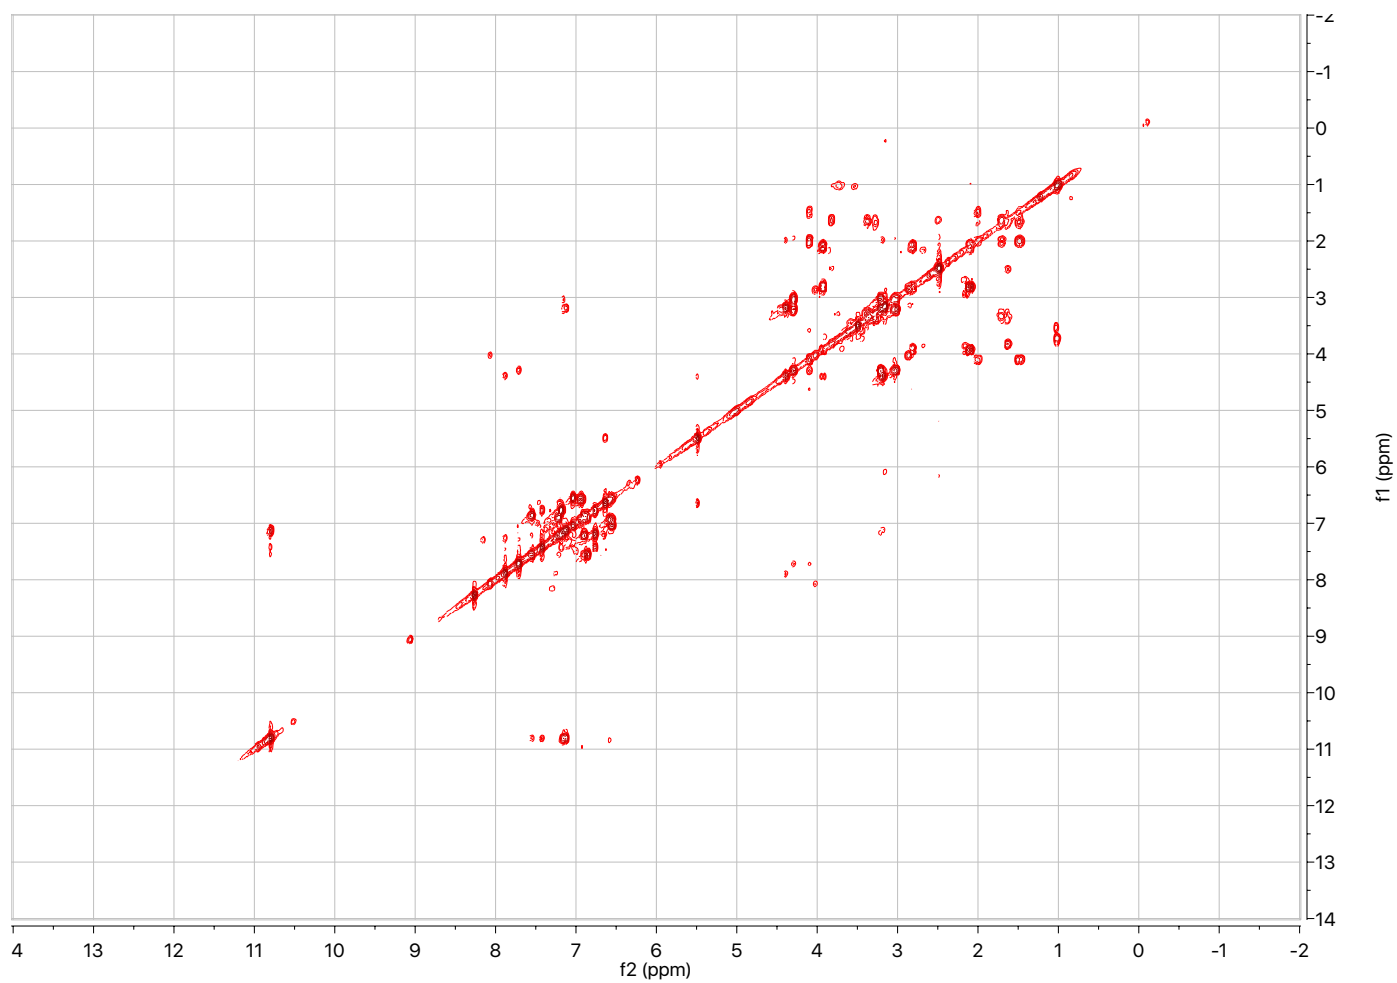

**Supplementary Table 3.** Cytochromes P450 used to generate sequence similarity network (SSN)

| <b>P450</b> | <b>Organism</b>                             | <b>Accession</b>   | <b>Natural Product</b> | <b>Reference</b>                     |
|-------------|---------------------------------------------|--------------------|------------------------|--------------------------------------|
| NascB       | <i>Streptomyces</i><br><i>sp.</i> CMB-MQ030 | AWF71596.1         | (-)-nasesezine C       | Nat. Commun. 2018, 4428              |
| P450NB5737  | <i>S. purpureus</i><br>(NRRL B-5737)        | WP_019889608       | guanitrypmycin C3-1    | <i>Org. Lett.</i> <b>2018</b> , 4921 |
| TxtC        | <i>S. scabies</i>                           | 6F0C_A             | thaxtomin A            | <i>JACS</i> <b>2019</b> , 216        |
| CypX        | <i>B. subtilis</i>                          | WP_148962661.<br>1 | pulcherrimic acid      | Biochemistry, 2010, 7282             |
| BcmD        | <i>S.</i><br><i>sapporonensis</i>           | AXQ04975.1         | bicyclomycin           | <i>ACIEE</i> <b>2018</b> , 719       |
| CYP121      | <i>M. tuberculosis</i>                      | P9WPP7.1           | mycocyclosin           | J. Biol. Chem. 2003, 5141            |

## Process of crystallization

### *Crystallization of NzeB.*

Single, diffraction quality crystals of the *NzeB* complexes were grown by sitting drop vapor diffusion at 20 °C by mixing 2  $\mu$ L of 8 mg/mL protein containing 1 mM DKP substrate and 0.2% DMSO with 2  $\mu$ L of a well solution containing 23% PEG 3350, 100 mM DL-malic acid, 2.5% ethylene glycol. Equimolar concentrations of substrate (0.5 mM) were used for the *NzeB*-6·17 complex. Sitting droplets were nucleated after 4 h from an earlier spontaneous crystallization using a cat whisker. Single crystals grew after 48 hours. 8  $\mu$ L of a cryoprotecting solution containing 10 mM Tris pH 7.5, 2 % glycerol, 23% PEG 3350, 100 mM DL-malic acid, 18% ethylene glycol, 1 mM DKP substrate, 0.2% DMSO was added directly to the sitting drops and the crystals were harvested using nylon loops and vitrified by rapid plunging into liquid nitrogen. *NzeB* crystallized in space group *P* 1 with unit cell dimensions of  $a = 56.1$  Å,  $b = 56.3$  Å,  $c = 58.8$  Å,  $\alpha = 91.1^\circ$ ,  $\beta = 92.9^\circ$ ,  $\gamma = 100.1^\circ$  and two chains in the asymmetric unit.

### *Data collection and processing.*

X-ray data were collected at 100 K on beamline 23ID-B at the National Institute for General Medical Sciences (NIGMS) and National Cancer Institute (NCI) Structural Biology Facility at the Advanced Photon Source in Argonne, IL, USA. Diffraction data were integrated and scaled using XDS.<sup>1</sup> Data collection statistics are given in Supplementary Table 2.

### *Molecular replacement, model building and refinement.*

The structure of NascB-F5053 was solved using Phenix MR-Rosetta.<sup>2</sup> This resulted in an initial model that could be extended by alternating cycles of manual building in Coot<sup>3</sup> and least-squares refinement with Phenix.<sup>4</sup> Final models were validated using MolProbity.<sup>5</sup>

**Supplementary Table 4. Data Collection Statistics**

|                                    | NzeB in complex with <b>6</b>                  | NzeB in complex with <b>6</b> and <b>17</b>    | NzeB ligand free                         |
|------------------------------------|------------------------------------------------|------------------------------------------------|------------------------------------------|
| Wavelength (Å)                     | 1.03                                           | 1.03                                           | 0.826                                    |
| Resolution range (Å)               | 40.83 - 1.49<br>(1.54 - 1.49)                  | 41.22 - 1.48<br>(1.53 - 1.48)                  | 39.13 - 1.498<br>(1.55 - 1.50)           |
| Space group                        | P 1                                            | P 1                                            | P 2 <sub>1</sub>                         |
| Unit cell                          | 56.12, 56.28, 58.78 Å<br>91.13, 92.93, 100.10° | 56.07, 56.13, 58.48 Å<br>91.36, 93.04, 101.10° | 55.71, 55.81, 56.10 Å<br>90, 101.92, 90° |
| Total reflections                  | 382537 (31077)                                 | 324387 (4806)                                  | 359895 (35646)                           |
| Unique reflections                 | 109037 (10046)                                 | 94423 (2902)                                   | 54058 (5282)                             |
| Multiplicity                       | 3.5 (3.1)                                      | 3.4 (1.7)                                      | 6.7 (6.7)                                |
| Completeness (%)                   | 94.48 (87.34)                                  | 80.96 (24.95)                                  | 99.66 (97.45)                            |
| Mean I/sigma(I)                    | 16.78 (2.39)                                   | 20.64 (1.81)                                   | 14.45 (1.35)                             |
| Wilson B-factor (Å <sup>2</sup> )  | 19.96                                          | 22.24                                          | 23.40                                    |
| R-merge                            | 0.039 (0.361)                                  | 0.030 (0.287)                                  | 0.056 (1.013)                            |
| R-meas                             | 0.046 (0.439)                                  | 0.036 (0.398)                                  | 0.061 (1.097)                            |
| CC1/2                              | 0.998 (0.85)                                   | 0.999 (0.851)                                  | 0.999 (0.743)                            |
|                                    |                                                |                                                |                                          |
| Reflections used in refinement     | 109025 (10043)                                 | 94401 (2902)                                   | 54024 (5279)                             |
| R-work                             | 0.168 (0.287)                                  | 0.192 (0.333)                                  | 0.188 (0.292)                            |
| R-free                             | 0.211 (0.340)                                  | 0.234 (0.410)                                  | 0.219 (0.307)                            |
| Number of atoms (total):           | 6989                                           | 6995                                           | 3441                                     |
| macromolecules                     | 6108                                           | 6079                                           | 3021                                     |
| ligands                            | 190                                            | 196                                            | 55                                       |
| solvent                            | 691                                            | 720                                            | 365                                      |
| Protein residues                   | 798                                            | 793                                            | 392                                      |
| RMS(bonds)                         | 0.005                                          | 0.007                                          | 0.006                                    |
| RMS(angles)                        | 0.91                                           | 1.23                                           | 0.84                                     |
| Ramachandran favored (%)           | 97.21                                          | 97.56                                          | 97.91                                    |
| Ramachandran allowed (%)           | 2.79                                           | 2.44                                           | 2.09                                     |
| Ramachandran outliers (%)          | 0.00                                           | 0.00                                           | 0.00                                     |
| Average B-factor (Å <sup>2</sup> ) | 27.51                                          | 28.55                                          | 31.52                                    |
| macromolecules                     | 26.79                                          | 28.07                                          | 30.84                                    |
| ligands                            | 19.50                                          | 22.09                                          | 25.73                                    |
| solvent                            | 36.01                                          | 34.38                                          | 37.97                                    |

**Supplementary Figure 21.** Comparison of A) NzeB substrate bound, and B) substrate free active sites.

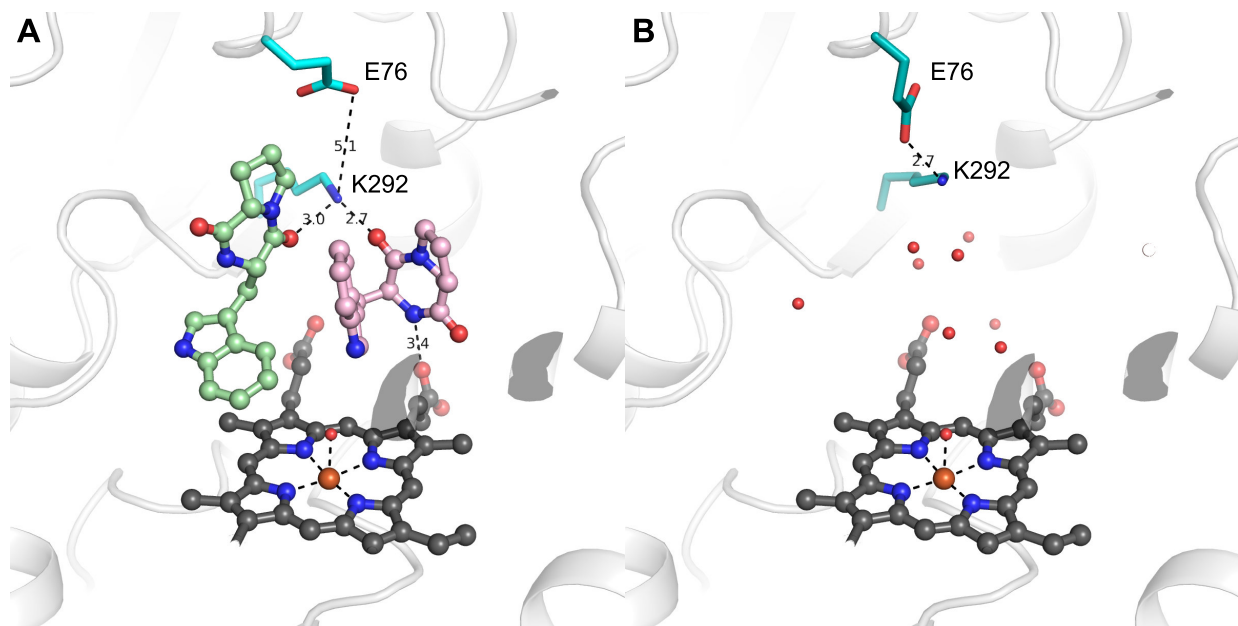



**Supplementary Figure 22.** NzeB Active site showing A) steric packing in dimerization site, b) open channel in cyclization site, C) and the view from 180° rotation.

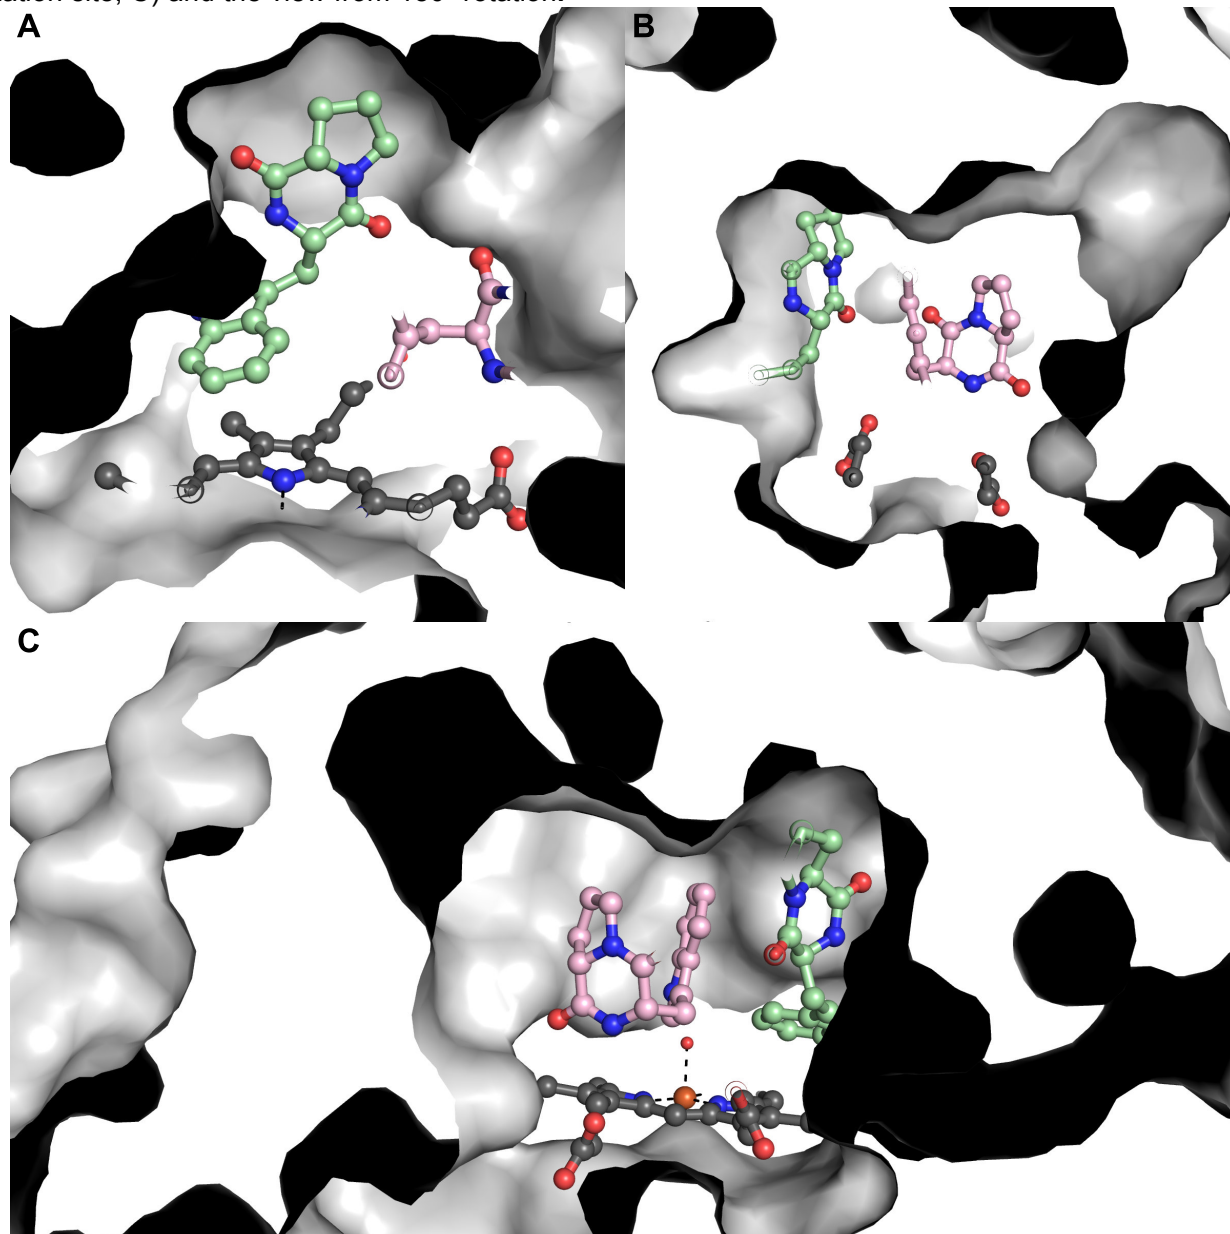

## Crystallography References:

1. Kabsch, W., Integration, scaling, space-group assignment and post-refinement. *Acta Crystallogr. D Biol. Crystallogr.* 2010, 66 (Pt 2), 133-44.
2. Terwilliger, T. C.; Dimaio, F.; Read, R. J.; Baker, D.; Bunkoczi, G.; Adams, P. D.; Grosse-Kunstleve, R. W.; Afonine, P. V.; Echols, N., phenix.mr\_rosetta: molecular replacement and model rebuilding with Phenix and Rosetta. *J. Struct. Funct. Genomics* 2012, 13 (2), 81-90.
3. Emsley, P.; Cowtan, K., Coot: model-building tools for molecular graphics. *Acta Crystallogr. D Biol. Crystallogr.* 2004, 60 (Pt 12 Pt 1), 2126-32.
4. Adams, P. D.; Afonine, P. V.; Bunkoczi, G.; Chen, V. B.; Davis, I. W.; Echols, N.; Headd, J. J.; Hung, L. W.; Kapral, G. J.; Grosse-Kunstleve, R. W.; McCoy, A. J.; Moriarty, N. W.; Oeffner, R.; Read, R. J.; Richardson, D. C.; Richardson, J. S.; Terwilliger, T. C.; Zwart, P. H., PHENIX: a comprehensive Python-based system for macromolecular structure solution. *Acta Crystallogr. D Biol. Crystallogr.* 2010, 66 (Pt 2), 213-21.
5. Chen, V. B.; Arendall, W. B., 3rd; Headd, J. J.; Keedy, D. A.; Immormino, R. M.; Kapral, G. J.; Murray, L. W.; Richardson, J. S.; Richardson, D. C., MolProbity: all-atom structure validation for macromolecular crystallography. *Acta Crystallogr. D Biol. Crystallogr.* 2010, 66 (Pt 1), 12-21.

## Computational Methods

Conformational searches were performed using the Schrödinger MacroModel<sup>1</sup> software package to identify low-energy conformers for quantum mechanical calculations. All quantum mechanical calculations were performed using the Gaussian 09<sup>2</sup> software package. Structures were optimized at the UB3LYP<sup>3,4</sup>/LanL2DZ(Fe)<sup>5</sup>/6-31G(d) level of theory using the CPCM<sup>6-8</sup> solvent model for diethyl ether, which is intended to model the environment of the enzyme active site; frequency calculations were used to confirm the presence of local minima (no imaginary frequencies) and transition states (one imaginary frequency). Thermochemistry corrections to obtain enthalpies and free energies were computed at 298 K and 1 M, with Truhlar corrections<sup>9</sup> applied to all frequencies below 100 cm<sup>-1</sup>. To obtain more accurate energetics, single-point energy calculations were performed on the optimized structures at the UB3LYP<sup>3,4</sup>/LanL2DZ(Fe)<sup>5</sup>/6-311++G(2d,2p) level of theory using Grimme's D3(BJ) dispersion correction<sup>10,11</sup> and the CPCM<sup>6-8</sup> solvent model for diethyl ether. For all iron-containing species, all possible spin states were computed separately; the spin state with the lowest free energy is reported and used in the computed reaction pathways.

**Supplementary Table 5:** Optimized Quantum Mechanical Energies and Geometries

| <b>Structure</b>                                  | <b>Single-Point Energy<br/>(Hartree)</b><br><br>UB3LYP/<br>6-311++G(2d,2p)<br><br>CPCM diethylether solvent<br><br>D3-BJ dispersion correction | <b>Enthalpy Correction<br/>(Hartree)</b><br><br>UB3LYP/6-31G(d)<br><br>CPCM diethylether<br>solvent | <b>Gibbs Free<br/>Energy Correction<br/>(Hartree)</b><br><br>UB3LYP/6-31G(d)<br><br>CPCM diethylether<br>solvent |
|---------------------------------------------------|------------------------------------------------------------------------------------------------------------------------------------------------|-----------------------------------------------------------------------------------------------------|------------------------------------------------------------------------------------------------------------------|
| Compound <b>6</b>                                 | -935.064995353                                                                                                                                 | 0.332193                                                                                            | 0.267005                                                                                                         |
| Compound <b>PC-I</b>                              | -2560.69811814                                                                                                                                 | 0.675898                                                                                            | 0.552976                                                                                                         |
| Transition State from <b>PC-I</b> to <b>R-I</b>   | -2560.68200451                                                                                                                                 | 0.668580                                                                                            | 0.548785                                                                                                         |
| Compound <b>R-I</b>                               | -934.408484774                                                                                                                                 | 0.318396                                                                                            | 0.252323                                                                                                         |
| Compound <b>PC-II</b>                             | -2560.69111264                                                                                                                                 | 0.675486                                                                                            | 0.550891                                                                                                         |
| Transition State from <b>PC-II</b> to <b>R-II</b> | -2560.66865641                                                                                                                                 | 0.668467                                                                                            | 0.549941                                                                                                         |
| Compound <b>R-II</b>                              | -934.378337774                                                                                                                                 | 0.317810                                                                                            | 0.251336                                                                                                         |
| Transition State from <b>R-II</b> to <b>R-III</b> | -934.375022742                                                                                                                                 | 0.317227                                                                                            | 0.254810                                                                                                         |
| Compound <b>R-III</b>                             | -934.406015167                                                                                                                                 | 0.319252                                                                                            | 0.257416                                                                                                         |
| 3-methylindole                                    | -403.297212617                                                                                                                                 | 0.166766                                                                                            | 0.125308                                                                                                         |
| Transition State from <b>R-III</b> to <b>R-IV</b> | -1337.68979078                                                                                                                                 | 0.486702                                                                                            | 0.403190                                                                                                         |
| Compound <b>R-IV</b>                              | -1337.70558024                                                                                                                                 | 0.488372                                                                                            | 0.406134                                                                                                         |
| Compound <b>PDT<sub>C-C</sub></b>                 | -1337.15954501                                                                                                                                 | 0.479009                                                                                            | 0.398229                                                                                                         |
| Compound <b>C-III</b>                             | -934.228902694                                                                                                                                 | 0.321380                                                                                            | 0.260447                                                                                                         |
| Transition State from <b>C-III</b> to <b>C-IV</b> | -1337.54044714                                                                                                                                 | 0.489605                                                                                            | 0.408473                                                                                                         |
| Compound <b>C-IV</b>                              | -1337.55215821                                                                                                                                 | 0.491575                                                                                            | 0.410726                                                                                                         |
| Compound <b>R-V</b>                               | -934.408292246                                                                                                                                 | 0.318638                                                                                            | 0.253313                                                                                                         |
| Transition State from <b>R-V</b> to <b>R-VI</b>   | -1337.69321370                                                                                                                                 | 0.486722                                                                                            | 0.403322                                                                                                         |
| Compound <b>R-VI</b>                              | -1337.70428197                                                                                                                                 | 0.488290                                                                                            | 0.400752                                                                                                         |
| Compound <b>PDT<sub>C-N</sub></b>                 | -1337.15657933                                                                                                                                 | 0.478377                                                                                            | 0.394108                                                                                                         |
| Compound <b>C-V</b>                               | -934.179753468                                                                                                                                 | 0.319454                                                                                            | 0.254095                                                                                                         |
| Iron-Oxo Quartet                                  | -1625.60979018                                                                                                                                 | 0.341464                                                                                            | 0.266017                                                                                                         |
| Iron-Hydroxo Triplet                              | -1626.26453700                                                                                                                                 | 0.352745                                                                                            | 0.277069                                                                                                         |
| Iron-Aqua Doublet                                 | -1626.92110182                                                                                                                                 | 0.365210                                                                                            | 0.288026                                                                                                         |
| Iron-Hydroxo Doublet Anion                        | -1626.42321553                                                                                                                                 | 0.351663                                                                                            | 0.276113                                                                                                         |
| Figure 11B Radical C2 TS                          | -1337.69755972                                                                                                                                 | 0.486871                                                                                            | 0.403638                                                                                                         |
| Figure 11B Radical C2 Product                     | -1337.72340783                                                                                                                                 | 0.489309                                                                                            | 0.407811                                                                                                         |
| Figure 11B Radical C3 TS                          | -1337.69205782                                                                                                                                 | 0.486851                                                                                            | 0.405608                                                                                                         |
| Figure 11B Radical C3 Product                     | -1337.70825431                                                                                                                                 | 0.488798                                                                                            | 0.408087                                                                                                         |
| Figure 11B Radical C4 TS                          | -1337.69550474                                                                                                                                 | 0.487160                                                                                            | 0.405177                                                                                                         |
| Figure 11B Radical C4 Product                     | -1337.71350934                                                                                                                                 | 0.489101                                                                                            | 0.407451                                                                                                         |
| Figure 11B Radical C5 TS                          | -1337.68979078                                                                                                                                 | 0.486702                                                                                            | 0.403190                                                                                                         |
| Figure 11B Radical C5 Product                     | -1337.70558024                                                                                                                                 | 0.488372                                                                                            | 0.406134                                                                                                         |
| Figure 11B Radical C6 TS                          | -1337.69174411                                                                                                                                 | 0.486788                                                                                            | 0.403349                                                                                                         |
| Figure 11B Radical C6 Product                     | -1337.70914756                                                                                                                                 | 0.488422                                                                                            | 0.405258                                                                                                         |
| Figure 11B Radical C7 TS                          | -1337.69379606                                                                                                                                 | 0.486938                                                                                            | 0.404223                                                                                                         |
| Figure 11B Radical C7 Product                     | -1337.71560829                                                                                                                                 | 0.489107                                                                                            | 0.407992                                                                                                         |
| Figure 11D Cation C2 TS                           | -1337.53832625                                                                                                                                 | 0.489255                                                                                            | 0.407257                                                                                                         |
| Figure 11D Cation C2 Product                      | -1337.56124772                                                                                                                                 | 0.491742                                                                                            | 0.410737                                                                                                         |
| Figure 11D Cation C3 TS                           | -1337.54174717                                                                                                                                 | 0.489798                                                                                            | 0.408678                                                                                                         |
| Figure 11D Cation C3 Product                      | -1337.56290761                                                                                                                                 | 0.492522                                                                                            | 0.413750                                                                                                         |

|                                           |                |          |          |
|-------------------------------------------|----------------|----------|----------|
| Figure 11D Cation C4 TS                   | -1337.53534315 | 0.489690 | 0.408765 |
| Figure 11D Cation C4 Product              | -1337.54696654 | 0.492005 | 0.412079 |
| Figure 11D Cation C5 TS                   | -1337.54044714 | 0.489605 | 0.408473 |
| Figure 11D Cation C5 Product              | -1337.55215821 | 0.491575 | 0.410726 |
| Figure 11D Cation C6 TS                   | -1337.53368503 | 0.489370 | 0.406633 |
| Figure 11D Cation C6 Product              | -1337.55077701 | 0.491474 | 0.409790 |
| Figure 11D Cation C7 TS                   | -1337.53365020 | 0.489592 | 0.407774 |
| Figure 11D Cation C7 Product              | -1337.55229112 | 0.491566 | 0.411883 |
| Figure 12B Radical C2 TS                  | -1337.69951164 | 0.486587 | 0.402050 |
| Figure 12B Radical C2 Product             | -1337.72283996 | 0.488652 | 0.402337 |
| Figure 12B Radical C3 TS                  | -1337.69039795 | 0.486633 | 0.404156 |
| Figure 12B Radical C3 Product             | -1337.69932417 | 0.488295 | 0.403578 |
| Figure 12B Radical C4 TS                  | -1337.69014921 | 0.486500 | 0.401321 |
| Figure 12B Radical C4 Product             | -1337.71217497 | 0.488517 | 0.401914 |
| Figure 12B Radical C5 TS                  | -1337.68944354 | 0.486708 | 0.404293 |
| Figure 12B Radical C5 Product             | -1337.69958304 | 0.488216 | 0.400754 |
| Figure 12B Radical C6 TS                  | -1337.69321370 | 0.486722 | 0.403322 |
| Figure 12B Radical C6 Product             | -1337.70428197 | 0.488290 | 0.400752 |
| Figure 12B Radical C7 TS                  | -1337.68740315 | 0.486476 | 0.401229 |
| Figure 12B Radical C7 Product             | -1337.70835455 | 0.488657 | 0.402298 |
| Compound <b>SI-6</b>                      | -935.062969833 | 0.332324 | 0.268187 |
| Compound <b>SI-PC-I</b>                   | -2560.69153790 | 0.675829 | 0.551602 |
| TS from <b>SI-PC-I</b> to <b>SI-R-I</b>   | -2560.67865279 | 0.668912 | 0.547686 |
| Compound <b>SI-R-I</b>                    | -934.408292246 | 0.318638 | 0.253313 |
| Compound <b>SI-PC-II</b>                  | -2560.69492543 | 0.676111 | 0.552240 |
| TS from <b>SI-PC-II</b> to <b>SI-R-II</b> | -2560.66886329 | 0.668918 | 0.548679 |
| Compound <b>SI-R-II</b>                   | -934.380566351 | 0.317339 | 0.251457 |
| TS from <b>SI-R-II</b> to <b>SI-R-III</b> | -934.378935128 | 0.317125 | 0.255510 |
| Compound <b>SI-R-III</b>                  | -934.402373050 | 0.319158 | 0.257062 |
| TS from <b>SI-R-III</b> to <b>SI-R-IV</b> | -1337.68947287 | 0.487089 | 0.404197 |
| Compound <b>SI-R-IV</b>                   | -1337.70630293 | 0.488419 | 0.405430 |
| Compound <b>SI-PDT<sub>c-c</sub></b>      | -1337.15713807 | 0.479196 | 0.399406 |
| Compound <b>SI-C-III</b>                  | -934.227258143 | 0.321166 | 0.259968 |
| TS from <b>SI-C-III</b> to <b>SI-C-IV</b> | -1337.53149035 | 0.489508 | 0.407077 |
| Compound <b>SI-C-IV</b>                   | -1337.54947128 | 0.491664 | 0.410192 |
| Figure S23B Radical C2 TS                 | -1337.69720677 | 0.486790 | 0.403187 |
| Figure S23B Radical C2 Product            | -1337.72387603 | 0.489129 | 0.407753 |
| Figure S23B Radical C3 TS                 | -1337.69024969 | 0.486815 | 0.406062 |
| Figure S23B Radical C3 Product            | -1337.70583195 | 0.488790 | 0.407690 |
| Figure S23B Radical C4 TS                 | -1337.69238834 | 0.487192 | 0.405409 |
| Figure S23B Radical C4 Product            | -1337.71039565 | 0.488908 | 0.407710 |
| Figure S23B Radical C5 TS                 | -1337.68710983 | 0.486895 | 0.403027 |
| Figure S23B Radical C5 Product            | -1337.70169171 | 0.488268 | 0.405240 |
| Figure S23B Radical C6 TS                 | -1337.68947287 | 0.487089 | 0.404197 |
| Figure S23B Radical C6 Product            | -1337.70630293 | 0.488419 | 0.405430 |
| Figure S23B Radical C7 TS                 | -1337.69515416 | 0.487005 | 0.404216 |
| Figure S23B Radical C7 Product            | -1337.71296380 | 0.488933 | 0.406893 |
| Figure S23D Cation C2 TS                  | -1337.53901559 | 0.489064 | 0.406499 |
| Figure S23D Cation C2 Product             | -1337.56397314 | 0.491670 | 0.411416 |
| Figure S23D Cation C3 TS                  | -1337.54056391 | 0.489799 | 0.410016 |
| Figure S23D Cation C3 Product             | -1337.56254502 | 0.492561 | 0.414297 |
| Figure S23D Cation C4 TS                  | -1337.53295258 | 0.489870 | 0.409363 |

|                                  |                |          |          |
|----------------------------------|----------------|----------|----------|
| Figure S23D Cation C4 Product    | -1337.54486276 | 0.491909 | 0.412625 |
| Figure S23D Cation C5 TS         | -1337.53078689 | 0.489548 | 0.407453 |
| Figure S23D Cation C5 Product    | -1337.54732307 | 0.491534 | 0.410373 |
| Figure S23D Cation C6 TS         | -1337.53149035 | 0.489508 | 0.407077 |
| Figure S23D Cation C6 Product    | -1337.54947128 | 0.491664 | 0.410192 |
| Figure S23D Cation C7 TS         | -1337.53688422 | 0.489745 | 0.408768 |
| Figure S23D Cation C7 Product    | -1337.54891315 | 0.491855 | 0.410992 |
| Compound <b>6</b> Radical Cation | -934.841312043 | 0.332396 | 0.265895 |
| Iron-Oxo Anion Triplet           | -1625.76714766 | 0.340805 | 0.266113 |

## Compound 6

O 1

|   |           |           |           |
|---|-----------|-----------|-----------|
| N | -3.499289 | 1.573570  | -1.088827 |
| C | 1.839291  | -1.196192 | -0.541564 |
| O | 1.826066  | -2.204846 | -1.249758 |
| C | 0.556139  | -0.411010 | -0.221570 |
| C | -5.029522 | 0.477437  | 0.591361  |
| C | 3.030029  | 0.481835  | 0.883470  |
| C | 4.482290  | 0.949079  | 0.719319  |
| C | 5.247060  | -0.376807 | 0.556634  |
| C | 4.296107  | -1.267749 | -0.264702 |
| C | 1.970015  | 1.520484  | 0.536979  |
| C | -0.483945 | -0.581218 | -1.349833 |
| C | -1.795276 | 0.089217  | -1.056838 |
| C | -2.259600 | 1.261651  | -1.608940 |
| C | -3.868917 | 0.603390  | -0.181298 |
| C | -2.815166 | -0.352831 | -0.133412 |
| C | -2.948156 | -1.465888 | 0.717596  |
| C | -4.099105 | -1.595235 | 1.485973  |
| C | -5.128482 | -0.631631 | 1.424408  |
| N | 0.848386  | 1.009082  | -0.026565 |
| N | 2.965631  | -0.703387 | 0.015475  |
| O | 2.130102  | 2.715542  | 0.776148  |
| H | -4.050301 | 2.379233  | -1.344403 |
| H | 0.136445  | -0.835920 | 0.704576  |
| H | -5.823219 | 1.217901  | 0.540913  |
| H | 2.854238  | 0.186240  | 1.931134  |
| H | 4.820264  | 1.545090  | 1.569466  |
| H | 4.567959  | 1.564711  | -0.182763 |
| H | 5.429127  | -0.827695 | 1.538699  |
| H | 6.214910  | -0.249410 | 0.064775  |
| H | 4.335977  | -2.322526 | 0.023834  |
| H | 4.493268  | -1.209952 | -1.341471 |
| H | -0.615877 | -1.656822 | -1.501350 |
| H | -0.054730 | -0.182839 | -2.276257 |
| H | -1.805210 | 1.896742  | -2.357757 |
| H | -2.165671 | -2.218741 | 0.770625  |
| H | -4.211946 | -2.451727 | 2.145046  |
| H | -6.016453 | -0.759741 | 2.037384  |
| H | 0.082201  | 1.657848  | -0.179663 |

## Compound PC-I

O 4

|   |           |           |           |
|---|-----------|-----------|-----------|
| N | -0.596448 | 1.739290  | -1.534251 |
| C | -6.297386 | 0.017667  | -0.842924 |
| O | -6.959349 | 0.271436  | -1.850792 |
| C | -4.919265 | 0.650980  | -0.599685 |
| C | -0.440828 | 4.164207  | -0.860686 |
| C | -5.986782 | -1.152197 | 1.353302  |
| C | -6.538474 | -2.534975 | 1.726270  |
| C | -8.011209 | -2.437386 | 1.288243  |
| C | -7.971361 | -1.597063 | -0.002778 |
| C | -4.477612 | -1.083105 | 1.162991  |
| C | -4.211008 | 0.972500  | -1.937796 |
| C | -2.845647 | 1.566283  | -1.741575 |

|    |           |           |           |
|----|-----------|-----------|-----------|
| C  | -1.643315 | 0.895236  | -1.828221 |
| C  | -1.101174 | 2.984314  | -1.228719 |
| C  | -2.519932 | 2.918625  | -1.355579 |
| C  | -3.279769 | 4.078241  | -1.110589 |
| C  | -2.626155 | 5.249747  | -0.745722 |
| C  | -1.220088 | 5.290688  | -0.619355 |
| N  | -4.069035 | -0.230024 | 0.200717  |
| N  | -6.725305 | -0.823292 | 0.124869  |
| O  | -3.706031 | -1.747724 | 1.862120  |
| H  | 0.376016  | 1.440389  | -1.432970 |
| H  | -5.082677 | 1.596314  | -0.058431 |
| H  | 0.641680  | 4.196268  | -0.771460 |
| H  | -6.240300 | -0.429680 | 2.146679  |
| H  | -6.413756 | -2.753915 | 2.788743  |
| H  | -6.009787 | -3.306060 | 1.155146  |
| H  | -8.596579 | -1.918981 | 2.056020  |
| H  | -8.469333 | -3.416352 | 1.125056  |
| H  | -8.831287 | -0.928556 | -0.108017 |
| H  | -7.919982 | -2.217351 | -0.905058 |
| H  | -4.868160 | 1.646328  | -2.495555 |
| H  | -4.139734 | 0.046438  | -2.519582 |
| H  | -1.453402 | -0.136177 | -2.095880 |
| H  | -4.362676 | 4.061509  | -1.208600 |
| H  | -3.203368 | 6.150625  | -0.554901 |
| H  | -0.737571 | 6.221287  | -0.332628 |
| H  | -3.066796 | -0.097832 | 0.096012  |
| Fe | 2.698903  | -0.358968 | -0.034310 |
| N  | 3.709959  | -1.370786 | -1.459031 |
| N  | 1.160416  | -1.647815 | -0.218547 |
| N  | 4.373503  | 0.689376  | 0.372216  |
| N  | 1.812282  | 0.443477  | 1.586758  |
| C  | 4.952458  | -1.073420 | -1.959394 |
| C  | -0.010933 | -1.643015 | 0.494156  |
| C  | 3.230708  | -2.402761 | -2.231846 |
| C  | 1.026875  | -2.644594 | -1.151045 |
| C  | 5.541406  | 0.707364  | -0.366327 |
| C  | 0.543208  | 0.179976  | 2.052269  |
| C  | 4.523504  | 1.666170  | 1.333597  |
| C  | 2.292255  | 1.463535  | 2.367179  |
| C  | 5.267568  | -1.939232 | -3.068861 |
| C  | -0.907608 | -2.660263 | 0.001433  |
| C  | 4.200933  | -2.769115 | -3.233895 |
| C  | -0.260048 | -3.283480 | -1.023142 |
| C  | 6.447649  | 1.694575  | 0.163457  |
| C  | 0.224115  | 1.054708  | 3.153004  |
| C  | 5.820971  | 2.284227  | 1.218017  |
| C  | 1.310011  | 1.852899  | 3.348350  |
| H  | 6.192387  | -1.906306 | -3.630102 |
| H  | -1.891581 | -2.846697 | 0.411917  |
| H  | 4.064950  | -3.559828 | -3.960304 |
| H  | -0.602979 | -4.102725 | -1.641881 |
| H  | 7.433361  | 1.897108  | -0.234897 |
| H  | -0.712248 | 1.041121  | 3.695466  |
| H  | 6.183772  | 3.073327  | 1.863856  |
| H  | 1.452913  | 2.632905  | 4.084941  |

|   |           |           |           |
|---|-----------|-----------|-----------|
| C | 5.806708  | -0.095443 | -1.461884 |
| C | -0.309839 | -0.793917 | 1.554543  |
| C | 3.558668  | 2.031086  | 2.259988  |
| C | 1.990300  | -3.005665 | -2.086647 |
| H | 6.763308  | 0.033025  | -1.957923 |
| H | -1.285266 | -0.910393 | 2.018369  |
| H | 3.807964  | 2.828703  | 2.952438  |
| H | 1.747310  | -3.817396 | -2.764801 |
| O | 2.081031  | 0.735586  | -1.077832 |
| S | 4.000270  | -1.995224 | 1.498491  |
| C | 3.902696  | -1.437322 | 3.226359  |
| H | 2.866539  | -1.367596 | 3.565672  |
| H | 4.459664  | -2.139863 | 3.853112  |
| H | 4.369427  | -0.449315 | 3.319768  |

Transition State from **PC-I** to **R-I**

0 4

|   |           |           |           |
|---|-----------|-----------|-----------|
| N | -0.336737 | 1.089292  | -1.372406 |
| C | -6.282375 | 0.092394  | -1.127643 |
| O | -6.745613 | 0.279307  | -2.253627 |
| C | -4.842179 | 0.499024  | -0.761109 |
| C | -0.082569 | 3.554161  | -0.962505 |
| C | -6.468963 | -0.681512 | 1.242359  |
| C | -7.359104 | -1.814134 | 1.772270  |
| C | -8.713984 | -1.519201 | 1.103141  |
| C | -8.342418 | -1.002519 | -0.299341 |
| C | -4.972452 | -0.968396 | 1.261612  |
| C | -3.955735 | 0.531748  | -2.027225 |
| C | -2.587327 | 1.072905  | -1.766223 |
| C | -1.385240 | 0.321217  | -1.678930 |
| C | -0.799405 | 2.403951  | -1.254509 |
| C | -2.203731 | 2.430086  | -1.495880 |
| C | -2.892044 | 3.652359  | -1.442625 |
| C | -2.172220 | 4.816843  | -1.146873 |
| C | -0.792856 | 4.768888  | -0.909551 |
| N | -4.282207 | -0.420394 | 0.230042  |
| N | -6.981989 | -0.467629 | -0.119460 |
| O | -4.449819 | -1.629255 | 2.158155  |
| H | 0.872119  | 0.709942  | -1.255216 |
| H | -4.885276 | 1.517918  | -0.344813 |
| H | 0.987308  | 3.520863  | -0.781662 |
| H | -6.626873 | 0.226673  | 1.847160  |
| H | -7.405227 | -1.822615 | 2.863099  |
| H | -6.959374 | -2.778732 | 1.441175  |
| H | -9.245742 | -0.740119 | 1.660843  |
| H | -9.362570 | -2.397741 | 1.056513  |
| H | -9.016501 | -0.222449 | -0.665465 |
| H | -8.319935 | -1.803041 | -1.047816 |
| H | -4.487480 | 1.144466  | -2.762309 |
| H | -3.893390 | -0.481860 | -2.437434 |
| H | -1.269344 | -0.745838 | -1.826849 |
| H | -3.960393 | 3.703908  | -1.633859 |
| H | -2.690469 | 5.769954  | -1.103656 |
| H | -0.256411 | 5.685549  | -0.683219 |
| H | -3.272538 | -0.522202 | 0.265552  |

|    |           |           |           |
|----|-----------|-----------|-----------|
| Fe | 2.746783  | -0.411197 | 0.079566  |
| N  | 3.311397  | -1.980796 | -1.068114 |
| N  | 1.020824  | -1.372572 | 0.515138  |
| N  | 4.530733  | 0.476025  | -0.247502 |
| N  | 2.262572  | 1.055009  | 1.368535  |
| C  | 4.491209  | -2.107276 | -1.754011 |
| C  | 0.043576  | -0.951774 | 1.379418  |
| C  | 2.560501  | -3.083438 | -1.387508 |
| C  | 0.578916  | -2.555962 | -0.019020 |
| C  | 5.539705  | 0.013102  | -1.054752 |
| C  | 1.111322  | 1.150490  | 2.107861  |
| C  | 4.935887  | 1.702947  | 0.209228  |
| C  | 2.969813  | 2.208445  | 1.606692  |
| C  | 4.492469  | -3.333171 | -2.517269 |
| C  | -1.053157 | -1.891657 | 1.389423  |
| C  | 3.293319  | -3.937343 | -2.292364 |
| C  | -0.720873 | -2.884112 | 0.513567  |
| C  | 6.618263  | 0.972796  | -1.097790 |
| C  | 1.098300  | 2.389771  | 2.847049  |
| C  | 6.242525  | 2.022718  | -0.317129 |
| C  | 2.247950  | 3.048947  | 2.530977  |
| H  | 5.311459  | -3.666985 | -3.141359 |
| H  | -1.956187 | -1.794180 | 1.980779  |
| H  | 2.922150  | -4.873026 | -2.690471 |
| H  | -1.286449 | -3.769528 | 0.252470  |
| H  | 7.533094  | 0.842815  | -1.661600 |
| H  | 0.301703  | 2.700226  | 3.510936  |
| H  | 6.785138  | 2.934567  | -0.102879 |
| H  | 2.594024  | 4.011762  | 2.884550  |
| C  | 5.533003  | -1.187431 | -1.750670 |
| C  | 0.080563  | 0.217669  | 2.128705  |
| C  | 4.208854  | 2.523293  | 1.064324  |
| C  | 1.284006  | -3.354262 | -0.912739 |
| H  | 6.405996  | -1.420640 | -2.351815 |
| H  | -0.769660 | 0.427322  | 2.769784  |
| H  | 4.651597  | 3.473493  | 1.345097  |
| H  | 0.807875  | -4.269531 | -1.249246 |
| O  | 2.038638  | 0.402233  | -1.241610 |
| S  | 3.789555  | -1.664610 | 1.855711  |
| C  | 4.483422  | -0.501372 | 3.087377  |
| H  | 3.702724  | 0.114871  | 3.540846  |
| H  | 4.965857  | -1.095724 | 3.869873  |
| H  | 5.233899  | 0.152763  | 2.633894  |

Compound **R-I**

0 2

|   |           |           |           |
|---|-----------|-----------|-----------|
| N | 3.546705  | -1.709327 | -1.054497 |
| C | -1.770616 | 1.170224  | -0.535921 |
| O | -1.700518 | 2.182332  | -1.235014 |
| C | -0.524194 | 0.322154  | -0.214274 |
| C | 5.042110  | -0.504590 | 0.559450  |
| C | -3.045978 | -0.458726 | 0.870851  |
| C | -4.515304 | -0.861219 | 0.688192  |
| C | -5.219236 | 0.498570  | 0.529315  |
| C | -4.222062 | 1.354406  | -0.274464 |



|   |           |           |           |
|---|-----------|-----------|-----------|
| C | -2.029734 | -1.541771 | 0.534706  |
| C | 0.514329  | 0.468437  | -1.351653 |
| C | 1.834196  | -0.149151 | -1.031519 |
| C | 2.356200  | -1.393326 | -1.534595 |
| C | 3.884711  | -0.648683 | -0.182242 |
| C | 2.854690  | 0.336174  | -0.141039 |
| C | 3.000655  | 1.478120  | 0.651952  |
| C | 4.177595  | 1.623339  | 1.405494  |
| C | 5.178032  | 0.650570  | 1.361276  |
| N | -0.880263 | -1.084387 | -0.027777 |
| N | -2.920240 | 0.726107  | 0.009228  |
| O | -2.238901 | -2.726276 | 0.779449  |
| H | -0.084251 | 0.726633  | 0.710841  |
| H | 5.824291  | -1.257066 | 0.524336  |
| H | -2.869745 | -0.174490 | 1.921348  |
| H | -4.887035 | -1.448373 | 1.530187  |
| H | -4.618304 | -1.465007 | -0.219947 |
| H | -5.392435 | 0.948604  | 1.513245  |
| H | -6.185938 | 0.417420  | 0.025792  |
| H | -4.214950 | 2.406303  | 0.026361  |
| H | -4.411368 | 1.317254  | -1.353308 |
| H | 0.621839  | 1.542913  | -1.532267 |
| H | 0.096066  | 0.025252  | -2.262020 |
| H | 1.850526  | -2.035814 | -2.250407 |
| H | 2.231602  | 2.245346  | 0.686934  |
| H | 4.310226  | 2.503663  | 2.027218  |
| H | 6.080352  | 0.783244  | 1.951261  |
| H | -0.151292 | -1.778242 | -0.156905 |

Compound **PC-II**

0 4

|   |           |           |           |
|---|-----------|-----------|-----------|
| N | -1.081610 | 3.574209  | -0.367355 |
| C | -4.828508 | -1.149960 | -0.914314 |
| O | -5.533899 | -0.916569 | -1.898068 |
| C | -3.788991 | -0.146194 | -0.375655 |
| C | -2.503315 | 5.301087  | 0.802224  |
| C | -4.090212 | -2.589002 | 0.981454  |
| C | -4.153208 | -4.119975 | 1.071138  |
| C | -5.565358 | -4.437310 | 0.546092  |
| C | -5.790792 | -3.409935 | -0.578320 |
| C | -2.682751 | -2.007974 | 0.859103  |
| C | -3.383093 | 0.869615  | -1.460637 |
| C | -2.691026 | 2.087988  | -0.920902 |
| C | -1.346592 | 2.367578  | -0.983335 |
| C | -2.258739 | 4.106340  | 0.114688  |
| C | -3.301821 | 3.194624  | -0.220817 |
| C | -4.622831 | 3.512460  | 0.146590  |
| C | -4.869562 | 4.698582  | 0.829846  |
| C | -3.819262 | 5.582916  | 1.156644  |
| N | -2.616331 | -0.858230 | 0.145078  |
| N | -4.914524 | -2.291578 | -0.199439 |
| O | -1.716390 | -2.557472 | 1.386847  |
| H | -0.160371 | 3.978104  | -0.266311 |
| H | -4.278730 | 0.406373  | 0.442936  |
| H | -1.694789 | 5.983956  | 1.049285  |

|    |           |           |           |
|----|-----------|-----------|-----------|
| H  | -4.549691 | -2.143610 | 1.879584  |
| H  | -3.977048 | -4.479351 | 2.087230  |
| H  | -3.385861 | -4.554511 | 0.421408  |
| H  | -6.304170 | -4.289377 | 1.342072  |
| H  | -5.662989 | -5.465548 | 0.187722  |
| H  | -6.829517 | -3.074904 | -0.656851 |
| H  | -5.489545 | -3.794480 | -1.560204 |
| H  | -4.302966 | 1.144690  | -1.986283 |
| H  | -2.746499 | 0.359645  | -2.193737 |
| H  | -0.544500 | 1.782463  | -1.409180 |
| H  | -5.442277 | 2.842604  | -0.102611 |
| H  | -5.886534 | 4.951748  | 1.117529  |
| H  | -4.041944 | 6.502124  | 1.691865  |
| H  | -1.699861 | -0.415139 | 0.079551  |
| Fe | 2.098308  | -0.293750 | -0.086056 |
| N  | 2.380291  | -0.311707 | -2.085102 |
| N  | 2.144331  | -2.308562 | -0.066360 |
| N  | 2.372321  | 1.707237  | -0.083003 |
| N  | 2.168517  | -0.295910 | 1.927106  |
| C  | 2.479199  | 0.775729  | -2.915957 |
| C  | 2.008865  | -3.129074 | 1.024204  |
| C  | 2.381265  | -1.409693 | -2.904159 |
| C  | 2.179781  | -3.141935 | -1.160350 |
| C  | 2.469478  | 2.528168  | -1.182959 |
| C  | 2.033858  | -1.388753 | 2.761682  |
| C  | 2.343381  | 2.538639  | 1.006300  |
| C  | 2.190130  | 0.806509  | 2.755913  |
| C  | 2.547440  | 0.352026  | -4.293198 |
| C  | 1.960915  | -4.510913 | 0.612121  |
| C  | 2.488075  | -1.008496 | -4.285768 |
| C  | 2.071592  | -4.519375 | -0.743974 |
| C  | 2.507587  | 3.910322  | -0.772226 |
| C  | 1.993709  | -0.961279 | 4.137466  |
| C  | 2.427866  | 3.916902  | 0.590348  |
| C  | 2.094157  | 0.395672  | 4.135039  |
| H  | 2.632824  | 1.021093  | -5.139646 |
| H  | 1.860643  | -5.349915 | 1.288277  |
| H  | 2.514152  | -1.691718 | -5.124758 |
| H  | 2.081077  | -5.366957 | -1.416950 |
| H  | 2.595824  | 4.751421  | -1.447946 |
| H  | 1.899034  | -1.629504 | 4.983490  |
| H  | 2.439103  | 4.764393  | 1.263702  |
| H  | 2.097091  | 1.074079  | 4.978360  |
| C  | 2.522218  | 2.101441  | -2.502769 |
| C  | 1.945703  | -2.705591 | 2.346456  |
| C  | 2.267085  | 2.124002  | 2.333481  |
| C  | 2.297162  | -2.731854 | -2.478967 |
| H  | 2.602051  | 2.863007  | -3.271868 |
| H  | 1.831470  | -3.466370 | 3.111470  |
| H  | 2.260522  | 2.894585  | 3.097638  |
| H  | 2.314545  | -3.503140 | -3.242232 |
| O  | 0.475589  | -0.191946 | -0.199320 |
| S  | 4.643118  | -0.622798 | 0.386079  |
| C  | 5.389542  | 0.950848  | 0.908600  |
| H  | 4.925309  | 1.283363  | 1.844986  |

|   |          |          |          |
|---|----------|----------|----------|
| H | 6.455336 | 0.788974 | 1.094717 |
| H | 5.251367 | 1.729051 | 0.154304 |

Transition State from **PC-II** to **R-II**

O 4

|    |           |           |           |
|----|-----------|-----------|-----------|
| N  | -0.318459 | 3.592617  | -1.955506 |
| C  | -4.297482 | -0.431363 | -0.107857 |
| O  | -5.206214 | 0.390622  | 0.062278  |
| C  | -2.866211 | 0.051773  | -0.406019 |
| C  | -1.047106 | 5.483346  | -0.441509 |
| C  | -3.494523 | -2.784155 | -0.345897 |
| C  | -4.238724 | -3.750085 | -1.277739 |
| C  | -5.653577 | -3.765115 | -0.663870 |
| C  | -5.866164 | -2.330908 | -0.119314 |
| C  | -2.152716 | -2.239268 | -0.830166 |
| C  | -2.953008 | 1.004022  | -1.683391 |
| C  | -2.047600 | 2.181106  | -1.618713 |
| C  | -0.849447 | 2.370649  | -2.283529 |
| C  | -1.153790 | 4.232012  | -1.053332 |
| C  | -2.255162 | 3.363693  | -0.819048 |
| C  | -3.270087 | 3.766380  | 0.067880  |
| C  | -3.164367 | 5.009036  | 0.686853  |
| C  | -2.067143 | 5.857687  | 0.433321  |
| N  | -1.852991 | -0.947307 | -0.595680 |
| N  | -4.508309 | -1.760540 | -0.078755 |
| O  | -1.341776 | -3.056153 | -1.299106 |
| H  | 0.572040  | 3.940552  | -2.280247 |
| H  | -2.584572 | 0.695945  | 0.436749  |
| H  | -0.205287 | 6.141314  | -0.638726 |
| H  | -3.267563 | -3.313055 | 0.594450  |
| H  | -3.769687 | -4.735519 | -1.311988 |
| H  | -4.255290 | -3.340370 | -2.294514 |
| H  | -5.695601 | -4.489253 | 0.157164  |
| H  | -6.425471 | -4.041564 | -1.387143 |
| H  | -6.326126 | -2.324391 | 0.874813  |
| H  | -6.484195 | -1.708995 | -0.774007 |
| H  | -3.990979 | 1.346846  | -1.735864 |
| H  | -2.749725 | 0.392638  | -2.567176 |
| H  | -0.330880 | 1.708149  | -2.961447 |
| H  | -4.114210 | 3.110934  | 0.266831  |
| H  | -3.939513 | 5.334485  | 1.375126  |
| H  | -2.014632 | 6.824100  | 0.927098  |
| H  | -0.402264 | -0.593587 | -0.782707 |
| Fe | 1.805219  | -0.484530 | 0.243709  |
| N  | 3.082580  | -1.452543 | -0.989664 |
| N  | 1.089034  | -2.256601 | 0.870031  |
| N  | 2.658453  | 1.274836  | -0.251045 |
| N  | 0.618346  | 0.473256  | 1.562763  |
| C  | 4.020515  | -0.881111 | -1.813016 |
| C  | 0.109613  | -2.458977 | 1.805651  |
| C  | 3.165611  | -2.802187 | -1.200892 |
| C  | 1.457774  | -3.505289 | 0.429138  |
| C  | 3.654813  | 1.473291  | -1.173867 |
| C  | -0.318726 | -0.097371 | 2.384964  |
| C  | 2.296146  | 2.522510  | 0.191694  |

|   |           |           |           |
|---|-----------|-----------|-----------|
| C | 0.524598  | 1.829397  | 1.761219  |
| C | 4.703983  | -1.899973 | -2.573309 |
| C | -0.138916 | -3.870008 | 1.972559  |
| C | 4.172889  | -3.094155 | -2.192417 |
| C | 0.699559  | -4.518991 | 1.119103  |
| C | 3.938226  | 2.880021  | -1.305458 |
| C | -1.020969 | 0.923493  | 3.124164  |
| C | 3.093490  | 3.532406  | -0.456448 |
| C | -0.497003 | 2.119823  | 2.737185  |
| H | 5.486387  | -1.706462 | -3.295649 |
| H | -0.864265 | -4.288712 | 2.658107  |
| H | 4.426972  | -4.088633 | -2.535690 |
| H | 0.805301  | -5.583049 | 0.952783  |
| H | 4.687823  | 3.296686  | -1.965755 |
| H | -1.807527 | 0.730688  | 3.842110  |
| H | 3.009192  | 4.595590  | -0.271192 |
| H | -0.767514 | 3.114880  | 3.065235  |
| C | 4.293761  | 0.475648  | -1.902035 |
| C | -0.565822 | -1.460008 | 2.497664  |
| C | 1.300922  | 2.789314  | 1.125432  |
| C | 2.416156  | -3.767794 | -0.536455 |
| H | 5.066640  | 0.784943  | -2.598322 |
| H | -1.335297 | -1.770807 | 3.196852  |
| H | 1.114446  | 3.828106  | 1.375762  |
| H | 2.597631  | -4.806384 | -0.792699 |
| O | 0.619764  | -0.338817 | -1.011237 |
| S | 3.387000  | -0.787264 | 2.002265  |
| C | 3.843603  | 0.832576  | 2.717955  |
| H | 2.966448  | 1.358701  | 3.104442  |
| H | 4.524823  | 0.632626  | 3.551211  |
| H | 4.351737  | 1.467818  | 1.988249  |

Compound **R-II**

O 2

|   |           |           |           |
|---|-----------|-----------|-----------|
| N | -3.068676 | -1.986608 | 0.268667  |
| C | 1.838962  | 1.398401  | -0.301609 |
| O | 1.665946  | 2.577640  | -0.004289 |
| C | 0.607305  | 0.512059  | -0.646042 |
| C | -5.137800 | -0.593746 | -0.114142 |
| C | 3.302596  | -0.630996 | -0.568764 |
| C | 4.365301  | -1.002555 | 0.470677  |
| C | 5.224630  | 0.276227  | 0.523773  |
| C | 4.222516  | 1.436392  | 0.328523  |
| C | 2.003218  | -1.437622 | -0.538494 |
| C | -0.245983 | 0.385108  | 0.668259  |
| C | -1.548222 | -0.334046 | 0.482195  |
| C | -1.738989 | -1.696167 | 0.487635  |
| C | -3.774508 | -0.811637 | 0.116757  |
| C | -2.841906 | 0.258006  | 0.241774  |
| C | -3.309897 | 1.580292  | 0.126310  |
| C | -4.662564 | 1.800740  | -0.104274 |
| C | -5.567869 | 0.724173  | -0.223784 |
| N | 0.969604  | -0.774322 | -1.162743 |
| N | 3.044276  | 0.790955  | -0.282924 |
| O | 1.931957  | -2.580584 | -0.110472 |

|   |           |           |           |
|---|-----------|-----------|-----------|
| H | -3.461429 | -2.915562 | 0.235496  |
| H | 0.012047  | 1.046565  | -1.392574 |
| H | -5.833050 | -1.423954 | -0.204905 |
| H | 3.722580  | -0.730006 | -1.581282 |
| H | 4.930613  | -1.891192 | 0.182063  |
| H | 3.883172  | -1.198629 | 1.434275  |
| H | 5.955036  | 0.268919  | -0.292160 |
| H | 5.776547  | 0.371921  | 1.462192  |
| H | 4.610832  | 2.226962  | -0.321113 |
| H | 3.916338  | 1.898715  | 1.272026  |
| H | -0.411680 | 1.410421  | 1.013361  |
| H | 0.369993  | -0.115847 | 1.424901  |
| H | -1.014399 | -2.489144 | 0.615845  |
| H | -2.624391 | 2.419496  | 0.215250  |
| H | -5.032882 | 2.818356  | -0.195049 |
| H | -6.619731 | 0.928568  | -0.403999 |

Transition State from **R-II** to **R-III**

O 2

|   |           |           |           |
|---|-----------|-----------|-----------|
| N | -2.338248 | -1.782052 | 0.475069  |
| C | 1.933448  | 1.512669  | -0.181575 |
| O | 2.058894  | 2.702385  | 0.125154  |
| C | 0.537341  | 0.908657  | -0.369460 |
| C | -4.622182 | -1.106776 | -0.355875 |
| C | 2.890735  | -0.756604 | -0.645921 |
| C | 4.074481  | -1.346518 | 0.129538  |
| C | 5.143821  | -0.246858 | -0.009728 |
| C | 4.348934  | 1.074951  | 0.039727  |
| C | 1.509286  | -1.360924 | -0.325239 |
| C | -0.365050 | 1.277650  | 0.852540  |
| C | -1.488169 | 0.289379  | 0.821722  |
| C | -1.219449 | -1.105681 | 0.872291  |
| C | -3.334571 | -0.883138 | 0.124791  |
| C | -2.815449 | 0.431926  | 0.331866  |
| C | -3.627429 | 1.545450  | 0.025327  |
| C | -4.912735 | 1.325481  | -0.448249 |
| C | -5.404278 | 0.015046  | -0.634552 |
| N | 0.470139  | -0.538664 | -0.518892 |
| N | 2.979812  | 0.675706  | -0.327892 |
| O | 1.433628  | -2.562620 | -0.030201 |
| H | -2.427303 | -2.787993 | 0.464407  |
| H | 0.099071  | 1.383704  | -1.258702 |
| H | -5.002807 | -2.111645 | -0.511650 |
| H | 3.052683  | -0.903312 | -1.725400 |
| H | 4.389042  | -2.311920 | -0.272224 |
| H | 3.790374  | -1.490144 | 1.178012  |
| H | 5.654658  | -0.342403 | -0.974357 |
| H | 5.904913  | -0.293345 | 0.773848  |
| H | 4.734002  | 1.830673  | -0.652713 |
| H | 4.331330  | 1.522036  | 1.039683  |
| H | -0.705282 | 2.312834  | 0.785343  |
| H | 0.214037  | 1.178042  | 1.778839  |
| H | -0.428730 | -1.638618 | 1.377713  |
| H | -3.252609 | 2.555097  | 0.166886  |
| H | -5.553270 | 2.170459  | -0.682559 |

|   |           |           |           |
|---|-----------|-----------|-----------|
| H | -6.414612 | -0.124762 | -1.007942 |
|---|-----------|-----------|-----------|

Compound **R-III**

O 2

|   |           |           |           |
|---|-----------|-----------|-----------|
| N | -1.825839 | -1.536027 | 0.207325  |
| C | 1.975028  | 1.532017  | -0.131974 |
| O | 2.210570  | 2.711006  | 0.136743  |
| C | 0.547036  | 1.018466  | -0.335224 |
| C | -4.258316 | -1.392632 | -0.397436 |
| C | 2.670484  | -0.827879 | -0.577819 |
| C | 3.948188  | -1.524530 | -0.091778 |
| C | 5.039840  | -0.475963 | -0.371066 |
| C | 4.361042  | 0.868827  | -0.056935 |
| C | 1.381177  | -1.311158 | 0.085301  |
| C | -0.528403 | 1.796064  | 0.475666  |
| C | -1.547686 | 0.728873  | 0.721137  |
| C | -0.874169 | -0.617174 | 0.825944  |
| C | -3.038255 | -0.875192 | 0.024054  |
| C | -2.866484 | 0.530932  | 0.258928  |
| C | -3.938795 | 1.410550  | -0.002590 |
| C | -5.155799 | 0.886643  | -0.430077 |
| C | -5.317060 | -0.498095 | -0.613139 |
| N | 0.395058  | -0.382956 | 0.116466  |
| N | 2.933692  | 0.593060  | -0.285417 |
| O | 1.249026  | -2.450859 | 0.530648  |
| H | -1.823790 | -2.498270 | 0.521265  |
| H | 0.312492  | 1.089499  | -1.407576 |
| H | -4.383988 | -2.457226 | -0.573881 |
| H | 2.555439  | -0.969950 | -1.664638 |
| H | 4.117559  | -2.473966 | -0.604246 |
| H | 3.865125  | -1.729827 | 0.980713  |
| H | 5.333211  | -0.510276 | -1.426391 |
| H | 5.939257  | -0.631425 | 0.230411  |
| H | 4.700409  | 1.686883  | -0.699142 |
| H | 4.510663  | 1.177494  | 0.984630  |
| H | -0.915425 | 2.650057  | -0.084502 |
| H | -0.074420 | 2.180189  | 1.398402  |
| H | -0.631596 | -0.957224 | 1.843486  |
| H | -3.817520 | 2.479030  | 0.153321  |
| H | -5.993234 | 1.552469  | -0.618361 |
| H | -6.278311 | -0.885672 | -0.939195 |

3-methylindole

O 1

|   |           |           |           |
|---|-----------|-----------|-----------|
| N | 0.632687  | 1.814318  | 0.000440  |
| C | -1.790518 | 1.108332  | 0.000038  |
| C | 2.641172  | -1.314436 | 0.000037  |
| C | 1.608295  | -0.226725 | -0.000164 |
| C | 1.834240  | 1.127603  | -0.000085 |
| C | -0.405047 | 0.907751  | 0.000049  |
| C | 0.174859  | -0.393770 | -0.000045 |
| C | -0.675624 | -1.514387 | 0.000006  |
| C | -2.052337 | -1.319799 | -0.000023 |
| C | -2.603782 | -0.020530 | -0.000047 |
| H | 0.536398  | 2.818369  | -0.001853 |

|   |           |           |           |
|---|-----------|-----------|-----------|
| H | -2.214783 | 2.108908  | 0.000084  |
| H | 2.550605  | -1.962805 | -0.881613 |
| H | 3.653333  | -0.896375 | 0.000588  |
| H | 2.771096  | 1.668609  | -0.000155 |
| H | -0.261497 | -2.519740 | 0.000054  |
| H | -2.717631 | -2.179206 | -0.000028 |
| H | -3.683712 | 0.100979  | -0.000093 |
| H | 2.549839  | -1.963186 | 0.881338  |

Transition State from R-III to R-IV

O 2

|   |           |           |           |
|---|-----------|-----------|-----------|
| N | -5.566010 | 0.067828  | -0.750328 |
| C | -3.454605 | 0.700912  | -1.990373 |
| C | -4.832501 | -3.102094 | 1.047864  |
| C | -4.862720 | -1.840573 | 0.238460  |
| C | -5.927209 | -0.991043 | 0.067570  |
| C | -4.252694 | -0.077585 | -1.125277 |
| C | -3.766090 | -1.271044 | -0.515001 |
| C | -2.448732 | -1.672261 | -0.752188 |
| C | -1.566897 | -0.813989 | -1.490162 |
| C | -2.154795 | 0.306253  | -2.202178 |
| H | -6.176279 | 0.822785  | -1.025463 |
| H | -3.867343 | 1.568247  | -2.499427 |
| H | -4.064844 | -3.062957 | 1.832136  |
| H | -5.796425 | -3.281852 | 1.535252  |
| H | -6.929326 | -1.051219 | 0.470160  |
| H | -2.068121 | -2.601321 | -0.336045 |
| H | -0.719156 | -1.296211 | -1.977442 |
| H | -1.526915 | 0.877519  | -2.879386 |
| H | -4.605915 | -3.979222 | 0.427063  |
| N | 0.370239  | 2.191987  | -0.782233 |
| C | 3.033387  | -1.588206 | 0.786701  |
| O | 2.865040  | -2.775631 | 1.068131  |
| C | 1.886553  | -0.574303 | 0.794455  |
| C | -0.928421 | 3.435362  | 0.975946  |
| C | 4.450511  | 0.349733  | 0.084470  |
| C | 5.747855  | 0.295457  | -0.733970 |
| C | 6.529909  | -0.847469 | -0.062876 |
| C | 5.448422  | -1.877127 | 0.310084  |
| C | 3.250176  | 0.937567  | -0.657262 |
| C | 0.495758  | -1.170169 | 0.492859  |
| C | -0.249851 | -0.002293 | -0.133561 |
| C | 0.783946  | 0.807292  | -0.931227 |
| C | -0.479647 | 2.290720  | 0.321110  |
| C | -0.896340 | 0.998166  | 0.725834  |
| C | -1.777322 | 0.862332  | 1.800922  |
| C | -2.236110 | 2.008060  | 2.462871  |
| C | -1.813846 | 3.277280  | 2.051555  |
| N | 2.057237  | 0.441918  | -0.260771 |
| N | 4.233375  | -1.060095 | 0.456805  |
| O | 3.369234  | 1.804301  | -1.526856 |
| H | 1.075567  | 2.898458  | -0.953090 |
| H | 1.873819  | -0.086820 | 1.781145  |
| H | -0.594050 | 4.422834  | 0.669273  |
| H | 4.605929  | 0.956180  | 0.991746  |

|   |           |           |           |
|---|-----------|-----------|-----------|
| H | 6.278617  | 1.249778  | -0.724339 |
| H | 5.511617  | 0.050567  | -1.775019 |
| H | 7.026897  | -0.481508 | 0.842661  |
| H | 7.296375  | -1.275343 | -0.714376 |
| H | 5.663680  | -2.414495 | 1.238490  |
| H | 5.293505  | -2.623200 | -0.478554 |
| H | 0.015751  | -1.549716 | 1.396973  |
| H | 0.606425  | -2.008434 | -0.205451 |
| H | 0.881116  | 0.552887  | -1.991896 |
| H | -2.101273 | -0.123659 | 2.122621  |
| H | -2.918971 | 1.910454  | 3.302204  |
| H | -2.171186 | 4.159557  | 2.576477  |

Compound R-IV

O 2

|   |           |           |           |
|---|-----------|-----------|-----------|
| N | -5.707588 | -0.106556 | -0.984684 |
| C | -3.514493 | 0.747008  | -1.934977 |
| C | -4.888469 | -3.070003 | 1.101239  |
| C | -4.944779 | -1.862661 | 0.215120  |
| C | -6.064454 | -1.160100 | -0.159222 |
| C | -4.344925 | -0.109478 | -1.157341 |
| C | -3.817546 | -1.201966 | -0.414240 |
| C | -2.448342 | -1.453522 | -0.410841 |
| C | -1.486476 | -0.564979 | -1.162549 |
| C | -2.173712 | 0.531195  | -1.950510 |
| H | -6.350730 | 0.555945  | -1.391436 |
| H | -3.952497 | 1.553633  | -2.518845 |
| H | -4.265773 | -2.894119 | 1.988841  |
| H | -5.887756 | -3.353622 | 1.447858  |
| H | -7.101804 | -1.324991 | 0.098605  |
| H | -2.045811 | -2.311287 | 0.120373  |
| H | -0.918361 | -1.191505 | -1.880610 |
| H | -1.538564 | 1.179253  | -2.547167 |
| H | -4.458452 | -3.936931 | 0.581580  |
| N | 0.440190  | 2.192594  | -0.853279 |
| C | 2.945619  | -1.604629 | 0.806795  |
| O | 2.746688  | -2.765072 | 1.168401  |
| C | 1.826344  | -0.562040 | 0.744898  |
| C | -0.594181 | 3.503371  | 1.028183  |
| C | 4.411405  | 0.243809  | -0.024422 |
| C | 5.697867  | 0.098899  | -0.849304 |
| C | 6.454800  | -1.018436 | -0.109762 |
| C | 5.349277  | -1.989588 | 0.342068  |
| C | 3.223802  | 0.825641  | -0.789041 |
| C | 0.434089  | -1.139490 | 0.474653  |
| C | -0.340452 | 0.004862  | -0.222402 |
| C | 0.758799  | 0.783485  | -1.023731 |
| C | -0.305836 | 2.334251  | 0.323546  |
| C | -0.819854 | 1.090218  | 0.732157  |
| C | -1.636557 | 1.010413  | 1.853518  |
| C | -1.936942 | 2.178235  | 2.571118  |
| C | -1.416667 | 3.407428  | 2.157253  |
| N | 2.019981  | 0.369075  | -0.376936 |
| N | 4.157585  | -1.131678 | 0.440048  |
| O | 3.362002  | 1.657868  | -1.688826 |

|   |           |           |           |
|---|-----------|-----------|-----------|
| H | 1.204444  | 2.833371  | -1.036675 |
| H | 1.828609  | -0.007655 | 1.695942  |
| H | -0.189497 | 4.460917  | 0.711799  |
| H | 4.595711  | 0.901995  | 0.840492  |
| H | 6.254623  | 1.036435  | -0.908040 |
| H | 5.443984  | -0.208518 | -1.869469 |
| H | 6.972483  | -0.606876 | 0.764048  |
| H | 7.201326  | -1.510890 | -0.738279 |
| H | 5.558649  | -2.466591 | 1.304176  |
| H | 5.166973  | -2.784081 | -0.391378 |
| H | -0.049433 | -1.474747 | 1.393645  |
| H | 0.523382  | -2.003791 | -0.193005 |
| H | 0.816040  | 0.530400  | -2.085830 |
| H | -2.038898 | 0.053708  | 2.175041  |
| H | -2.571343 | 2.124434  | 3.451162  |
| H | -1.647894 | 4.307559  | 2.721269  |

Compound PDT<sub>c-c</sub>

0 1

|   |           |           |           |
|---|-----------|-----------|-----------|
| N | -5.659156 | -1.125029 | -1.454404 |
| C | -3.636937 | 0.287975  | -2.002739 |
| C | -4.842626 | -2.913365 | 1.701484  |
| C | -4.913807 | -2.080493 | 0.456239  |
| C | -5.964187 | -1.998092 | -0.424986 |
| C | -4.393358 | -0.620818 | -1.254922 |
| C | -3.891169 | -1.202051 | -0.058515 |
| C | -2.598926 | -0.858948 | 0.378889  |
| C | -1.828157 | 0.039517  | -0.358017 |
| C | -2.367123 | 0.609054  | -1.541098 |
| H | -4.025603 | 0.731838  | -2.915406 |
| H | -4.691284 | -2.295760 | 2.596717  |
| H | -5.765336 | -3.484911 | 1.846327  |
| H | -6.922195 | -2.500063 | -0.401743 |
| H | -2.212353 | -1.301169 | 1.292335  |
| H | -1.770426 | 1.321956  | -2.102336 |
| H | -4.010942 | -3.629420 | 1.665855  |
| N | 0.593831  | 2.105467  | -1.321278 |
| C | 2.647188  | -1.472023 | 1.206004  |
| O | 2.320724  | -2.379984 | 1.971345  |
| C | 1.743132  | -0.267752 | 0.930557  |
| C | 0.275050  | 4.133009  | 0.138959  |
| C | 4.222796  | -0.371656 | -0.394160 |
| C | 5.272186  | -1.061090 | -1.277193 |
| C | 5.947897  | -2.042169 | -0.302816 |
| C | 4.797800  | -2.540030 | 0.590544  |
| C | 3.031205  | 0.210497  | -1.152344 |
| C | 0.246864  | -0.561871 | 1.054812  |
| C | -0.437501 | 0.466807  | 0.120186  |
| C | 0.602250  | 0.676218  | -1.040318 |
| C | 0.173294  | 2.774577  | -0.163366 |
| C | -0.467513 | 1.882785  | 0.712514  |
| C | -1.032749 | 2.345307  | 1.893174  |
| C | -0.937517 | 3.708236  | 2.211029  |
| C | -0.287126 | 4.585870  | 1.338651  |
| N | 1.870299  | 0.193038  | -0.459589 |

|   |           |           |           |
|---|-----------|-----------|-----------|
| N | 3.823864  | -1.437645 | 0.542030  |
| O | 3.135572  | 0.674322  | -2.290391 |
| H | 1.409454  | 2.446032  | -1.819171 |
| H | 2.032769  | 0.539380  | 1.620800  |
| H | 0.776938  | 4.820272  | -0.536656 |
| H | 4.691019  | 0.457025  | 0.161800  |
| H | 5.965118  | -0.345365 | -1.724354 |
| H | 4.769942  | -1.598617 | -2.088684 |
| H | 6.693005  | -1.515607 | 0.304226  |
| H | 6.455068  | -2.864431 | -0.814194 |
| H | 5.104382  | -2.735901 | 1.622326  |
| H | 4.333054  | -3.453703 | 0.201257  |
| H | -0.094246 | -0.486164 | 2.089249  |
| H | 0.048146  | -1.579994 | 0.707569  |
| H | 0.390496  | 0.106782  | -1.947355 |
| H | -1.542012 | 1.660460  | 2.567340  |
| H | -1.369184 | 4.080411  | 3.135596  |
| H | -0.213885 | 5.640391  | 1.591944  |
| H | -6.269967 | -0.895924 | -2.223785 |

Compound C-III

1 1

|   |           |           |           |
|---|-----------|-----------|-----------|
| N | -1.843818 | -1.512494 | 0.257149  |
| C | 2.006729  | 1.529724  | -0.091016 |
| O | 2.224830  | 2.683849  | 0.272329  |
| C | 0.587546  | 1.062692  | -0.442791 |
| C | -4.287649 | -1.445226 | -0.199211 |
| C | 2.679528  | -0.823946 | -0.609120 |
| C | 3.924232  | -1.572061 | -0.113030 |
| C | 5.040947  | -0.524621 | -0.271163 |
| C | 4.368761  | 0.804905  | 0.108496  |
| C | 1.361142  | -1.300584 | -0.007939 |
| C | -0.524615 | 1.849467  | 0.315826  |
| C | -1.532267 | 0.775006  | 0.511678  |
| C | -0.844548 | -0.543404 | 0.707564  |
| C | -3.020865 | -0.894400 | 0.093849  |
| C | -2.845435 | 0.556468  | 0.198926  |
| C | -3.945640 | 1.432272  | -0.082730 |
| C | -5.152305 | 0.871457  | -0.383810 |
| C | -5.313006 | -0.557853 | -0.432423 |
| N | 0.367371  | -0.360285 | -0.057767 |
| N | 2.951094  | 0.577184  | -0.227982 |
| O | 1.171001  | -2.411728 | 0.469505  |
| H | -1.729771 | -2.508472 | 0.409070  |
| H | 0.442911  | 1.175059  | -1.524728 |
| H | -4.435437 | -2.517515 | -0.257474 |
| H | 2.595197  | -0.906573 | -1.704048 |
| H | 4.103346  | -2.486239 | -0.682695 |
| H | 3.789617  | -1.847788 | 0.937837  |
| H | 5.381101  | -0.489612 | -1.311892 |
| H | 5.908373  | -0.738371 | 0.357889  |
| H | 4.754814  | 1.663651  | -0.446997 |
| H | 4.456646  | 1.026179  | 1.178362  |
| H | -0.898201 | 2.702369  | -0.250986 |
| H | -0.125932 | 2.219624  | 1.268502  |

|   |           |           |           |
|---|-----------|-----------|-----------|
| H | -0.625059 | -0.772373 | 1.762091  |
| H | -3.811293 | 2.507028  | -0.026894 |
| H | -6.014871 | 1.496611  | -0.586205 |
| H | -6.295957 | -0.950760 | -0.674931 |

Transition State from **C-III** to **C-IV**

1 1

|   |           |           |           |
|---|-----------|-----------|-----------|
| N | -5.209632 | 0.262283  | -0.586504 |
| C | -3.203395 | 0.840413  | -1.976389 |
| C | -4.627184 | -3.106813 | 0.887129  |
| C | -4.614109 | -1.782017 | 0.187942  |
| C | -5.597134 | -0.833208 | 0.186381  |
| C | -3.976616 | 0.047186  | -1.101810 |
| C | -3.546267 | -1.243534 | -0.632385 |
| C | -2.301151 | -1.707898 | -1.016250 |
| C | -1.454746 | -0.860671 | -1.786322 |
| C | -1.968702 | 0.359614  | -2.342749 |
| H | -5.777610 | 1.083321  | -0.746843 |
| H | -3.585522 | 1.780169  | -2.362403 |
| H | -3.799807 | -3.193684 | 1.602521  |
| H | -5.561637 | -3.249195 | 1.437454  |
| H | -6.561623 | -0.834086 | 0.674360  |
| H | -1.941769 | -2.682704 | -0.699706 |
| H | -0.577471 | -1.302144 | -2.248819 |
| H | -1.352023 | 0.925162  | -3.032984 |
| H | -4.526682 | -3.936026 | 0.176185  |
| N | 0.212167  | 2.155357  | -0.599177 |
| C | 3.064318  | -1.597984 | 0.666610  |
| O | 2.941516  | -2.816807 | 0.780964  |
| C | 1.864309  | -0.652221 | 0.798628  |
| C | -1.371289 | 3.180726  | 1.038707  |
| C | 4.373960  | 0.491170  | 0.248974  |
| C | 5.701164  | 0.624974  | -0.510089 |
| C | 6.525615  | -0.557286 | 0.029508  |
| C | 5.497739  | -1.688511 | 0.199805  |
| C | 3.162285  | 1.087500  | -0.463797 |
| C | 0.515217  | -1.300054 | 0.400845  |
| C | -0.245062 | -0.095669 | -0.107465 |
| C | 0.745076  | 0.829190  | -0.832893 |
| C | -0.741248 | 2.118853  | 0.373120  |
| C | -1.049099 | 0.759509  | 0.704185  |
| C | -1.973371 | 0.475660  | 1.734178  |
| C | -2.581684 | 1.527568  | 2.395690  |
| C | -2.282206 | 2.863342  | 2.037875  |
| N | 1.982266  | 0.503264  | -0.116804 |
| N | 4.232324  | -0.967634 | 0.425187  |
| O | 3.227386  | 2.015536  | -1.264898 |
| H | 0.721965  | 2.979367  | -0.886630 |
| H | 1.813658  | -0.299732 | 1.838190  |
| H | -1.139534 | 4.211872  | 0.793522  |
| H | 4.449869  | 0.981310  | 1.232721  |
| H | 6.171736  | 1.595531  | -0.340323 |
| H | 5.519506  | 0.519766  | -1.584766 |
| H | 6.963572  | -0.299222 | 1.000007  |
| H | 7.340634  | -0.842364 | -0.640232 |

|   |           |           |           |
|---|-----------|-----------|-----------|
| H | 5.713278  | -2.349326 | 1.043872  |
| H | 5.407519  | -2.308657 | -0.699634 |
| H | 0.031034  | -1.787954 | 1.247248  |
| H | 0.690544  | -2.048660 | -0.375847 |
| H | 0.887564  | 0.661779  | -1.902258 |
| H | -2.193115 | -0.551810 | 2.003906  |
| H | -3.290257 | 1.334059  | 3.193926  |
| H | -2.773446 | 3.671477  | 2.572534  |

Compound **C-IV**

1 1

|   |           |           |           |
|---|-----------|-----------|-----------|
| N | -5.647849 | -0.163982 | -1.064375 |
| C | -3.500934 | 0.740552  | -1.956776 |
| C | -4.894590 | -3.074322 | 1.141437  |
| C | -4.942774 | -1.893042 | 0.225743  |
| C | -6.037991 | -1.219164 | -0.210976 |
| C | -4.324256 | -0.131559 | -1.192630 |
| C | -3.798900 | -1.219538 | -0.384328 |
| C | -2.456582 | -1.414697 | -0.332673 |
| C | -1.518574 | -0.539144 | -1.089870 |
| C | -2.160947 | 0.538712  | -1.905149 |
| H | -6.294610 | 0.473339  | -1.515326 |
| H | -3.939724 | 1.530300  | -2.557389 |
| H | -4.317288 | -2.850763 | 2.046276  |
| H | -5.901210 | -3.371654 | 1.446142  |
| H | -7.086674 | -1.376641 | -0.005002 |
| H | -2.035003 | -2.228748 | 0.249905  |
| H | -1.003861 | -1.209824 | -1.804330 |
| H | -1.499965 | 1.188129  | -2.468717 |
| H | -4.418714 | -3.933438 | 0.654255  |
| N | 0.411151  | 2.171135  | -0.902376 |
| C | 2.930070  | -1.608562 | 0.817419  |
| O | 2.713867  | -2.766109 | 1.176857  |
| C | 1.821497  | -0.550925 | 0.777156  |
| C | -0.570374 | 3.548170  | 0.963059  |
| C | 4.396394  | 0.225560  | -0.041922 |
| C | 5.677309  | 0.072355  | -0.874022 |
| C | 6.431205  | -1.050119 | -0.139169 |
| C | 5.322973  | -2.015876 | 0.315540  |
| C | 3.204720  | 0.803108  | -0.802065 |
| C | 0.421922  | -1.128088 | 0.538595  |
| C | -0.343655 | 0.013358  | -0.170655 |
| C | 0.746260  | 0.759845  | -1.015439 |
| C | -0.300573 | 2.356339  | 0.289966  |
| C | -0.805694 | 1.130001  | 0.756669  |
| C | -1.594022 | 1.084204  | 1.900962  |
| C | -1.873019 | 2.274665  | 2.585310  |
| C | -1.361803 | 3.488679  | 2.114921  |
| N | 1.999859  | 0.370399  | -0.353815 |
| N | 4.138339  | -1.147837 | 0.431055  |
| O | 3.324239  | 1.606783  | -1.726776 |
| H | 1.163233  | 2.810349  | -1.137089 |
| H | 1.846015  | 0.006585  | 1.725035  |
| H | -0.173798 | 4.493987  | 0.605835  |
| H | 4.585667  | 0.887280  | 0.818737  |

|   |           |           |           |
|---|-----------|-----------|-----------|
| H | 6.239544  | 1.006379  | -0.934107 |
| H | 5.416362  | -0.232292 | -1.893098 |
| H | 6.955170  | -0.643242 | 0.732794  |
| H | 7.171380  | -1.545374 | -0.772529 |
| H | 5.535184  | -2.500659 | 1.272690  |
| H | 5.126546  | -2.802344 | -0.422599 |
| H | -0.048612 | -1.432863 | 1.475099  |
| H | 0.499505  | -2.011127 | -0.104720 |
| H | 0.800100  | 0.467323  | -2.067675 |
| H | -1.982723 | 0.140223  | 2.275221  |
| H | -2.480487 | 2.252143  | 3.484775  |
| H | -1.577357 | 4.406476  | 2.655127  |

Compound R-V

0 2

|   |           |           |           |
|---|-----------|-----------|-----------|
| N | -3.049957 | 1.767668  | -0.938990 |
| C | 1.226975  | -0.379821 | 1.350606  |
| O | 0.668817  | -1.205515 | 2.078688  |
| C | 0.891815  | 1.119025  | 1.446887  |
| C | -3.937156 | -0.528659 | -1.404071 |
| C | 2.951727  | 0.232762  | -0.356465 |
| C | 3.358945  | -0.614142 | -1.568735 |
| C | 3.598159  | -1.999161 | -0.939197 |
| C | 2.528685  | -2.114275 | 0.165686  |
| C | 2.191476  | 1.510604  | -0.674993 |
| C | -0.590898 | 1.344209  | 1.848498  |
| C | -1.600186 | 1.142981  | 0.761433  |
| C | -2.163567 | 2.189106  | -0.058441 |
| C | -3.128193 | 0.370188  | -0.735631 |
| C | -2.247992 | -0.055782 | 0.304737  |
| C | -2.194798 | -1.406082 | 0.671805  |
| C | -3.019767 | -2.316515 | -0.008681 |
| C | -3.873622 | -1.888708 | -1.027255 |
| N | 1.213738  | 1.831963  | 0.211707  |
| N | 2.173231  | -0.713534 | 0.453780  |
| O | 2.474247  | 2.204186  | -1.647704 |
| H | 1.499014  | 1.511817  | 2.277799  |
| H | -4.604721 | -0.196304 | -2.193602 |
| H | 3.855768  | 0.535333  | 0.197462  |
| H | 4.236716  | -0.209331 | -2.076008 |
| H | 2.532376  | -0.644972 | -2.286978 |
| H | 4.599817  | -2.040306 | -0.497273 |
| H | 3.522188  | -2.811683 | -1.666205 |
| H | 2.895304  | -2.612983 | 1.068029  |
| H | 1.631644  | -2.646631 | -0.168840 |
| H | -0.676916 | 2.370569  | 2.224488  |
| H | -0.783836 | 0.667611  | 2.685956  |
| H | -1.913981 | 3.244200  | 0.022986  |
| H | -1.518446 | -1.741265 | 1.451010  |
| H | -2.991264 | -3.368044 | 0.261809  |
| H | -4.502380 | -2.611211 | -1.539980 |
| H | 0.765510  | 2.726764  | 0.048899  |

Transition State from R-V to R-VI

0 2

|   |           |           |           |
|---|-----------|-----------|-----------|
| N | 1.628868  | 2.371470  | 0.385167  |
| C | -3.057800 | -0.383152 | 1.292029  |
| O | -3.737536 | 0.514829  | 1.793887  |
| C | -1.622581 | -0.692437 | 1.759793  |
| C | 0.332875  | 3.860637  | -1.181784 |
| C | -2.761023 | -2.328535 | -0.245852 |
| C | -3.469395 | -2.577941 | -1.583383 |
| C | -4.936073 | -2.242684 | -1.256950 |
| C | -4.846998 | -1.048538 | -0.289576 |
| C | -1.277190 | -2.000168 | -0.342929 |
| C | -0.921317 | 0.532525  | 2.415086  |
| C | -0.165289 | 1.417839  | 1.465689  |
| C | 1.205666  | 1.451723  | 1.325502  |
| C | 0.465431  | 2.904003  | -0.169023 |
| C | -0.678346 | 2.370905  | 0.497738  |
| C | -1.957553 | 2.836098  | 0.159862  |
| C | -2.081661 | 3.786109  | -0.854961 |
| C | -0.950282 | 4.288995  | -1.522441 |
| N | -0.813341 | -1.233708 | 0.663127  |
| N | -3.519814 | -1.205633 | 0.327785  |
| O | -0.579786 | -2.430606 | -1.271574 |
| H | -1.728718 | -1.460371 | 2.541819  |
| H | 1.205318  | 4.268784  | -1.685649 |
| H | -2.859558 | -3.216158 | 0.400716  |
| H | -3.326397 | -3.600416 | -1.939099 |
| H | -3.069333 | -1.895647 | -2.340699 |
| H | -5.413539 | -3.093734 | -0.758530 |
| H | -5.523112 | -2.005611 | -2.147886 |
| H | -5.627882 | -1.051486 | 0.476472  |
| H | -4.892440 | -0.084966 | -0.810284 |
| H | -0.223341 | 0.150971  | 3.168011  |
| H | -1.706800 | 1.077960  | 2.947712  |
| H | 1.941598  | 0.872288  | 1.872365  |
| H | -2.834709 | 2.460448  | 0.678417  |
| H | -3.068542 | 4.149615  | -1.130270 |
| H | -1.075982 | 5.029132  | -2.308464 |
| H | 0.141219  | -0.893382 | 0.590969  |
| N | 2.283452  | -2.063674 | -1.021218 |
| C | 2.276500  | 0.423216  | -1.356496 |
| C | 5.321341  | -2.829177 | 0.988720  |
| C | 4.184181  | -2.233125 | 0.212777  |
| C | 3.120222  | -2.922849 | -0.355244 |
| C | 2.766582  | -0.773905 | -0.864981 |
| C | 3.968233  | -0.860003 | -0.091867 |
| C | 4.673715  | 0.341163  | 0.210390  |
| C | 4.167951  | 1.544587  | -0.201453 |
| C | 2.904802  | 1.638663  | -0.916648 |
| H | 1.322837  | -2.282504 | -1.301820 |
| H | 1.389518  | 0.466976  | -1.980630 |
| H | 5.196008  | -3.910690 | 1.101922  |
| H | 6.285879  | -2.656927 | 0.493982  |
| H | 2.906609  | -3.983242 | -0.326546 |
| H | 5.612699  | 0.297331  | 0.756450  |
| H | 4.690834  | 2.468077  | 0.027645  |
| H | 2.774659  | 2.511858  | -1.546851 |

H 5.395658 -2.394980 1.993737

Compound R-VI

O 2

N -1.872034 1.532076 0.088560  
C 3.904836 0.046474 1.075030  
O 4.234756 0.472665 2.183532  
C 2.611276 0.503892 0.380565  
C -1.833326 3.853849 -0.921656  
C 4.304828 -1.365469 -0.952649  
C 5.047536 -2.707464 -0.994375  
C 6.325048 -2.411468 -0.188406  
C 5.857411 -1.466262 0.934344  
C 2.800764 -1.450830 -1.183020  
C 1.552130 0.926563 1.422215  
C 0.280963 1.435015 0.805328  
C -0.913249 0.757743 0.713912  
C -1.293603 2.739717 -0.263177  
C 0.061044 2.716963 0.181557  
C 0.871115 3.847261 -0.030497  
C 0.334044 4.953610 -0.677650  
C -1.005066 4.953460 -1.120870  
N 2.073148 -0.556684 -0.470996  
N 4.645378 -0.842134 0.378803  
O 2.310969 -2.258975 -1.969424  
H 2.863928 1.383060 -0.234113  
H -2.861533 3.868290 -1.270650  
H 4.709000 -0.696438 -1.730346  
H 5.243779 -3.036362 -2.016867  
H 4.441387 -3.475111 -0.500989  
H 7.059909 -1.904450 -0.823843  
H 6.794989 -3.315586 0.207356  
H 6.599003 -0.704592 1.193825  
H 5.597840 -2.003950 1.853703  
H 2.016525 1.686760 2.057616  
H 1.340032 0.065068 2.065603  
H -1.173397 -0.226946 1.078554  
H 1.903813 3.857574 0.309654  
H 0.951440 5.831622 -0.847058  
H -1.399643 5.829534 -1.628406  
H 1.077749 -0.519606 -0.670269  
N -5.051880 -1.572970 1.855717  
C -3.921373 0.466496 0.953583  
C -5.072142 -4.083306 -0.885284  
C -4.925682 -2.897371 0.023114  
C -5.359011 -2.814429 1.339577  
C -4.407755 -0.818460 0.887212  
C -4.324024 -1.647306 -0.280162  
C -3.699024 -1.112289 -1.456058  
C -3.203792 0.148626 -1.459186  
C -3.244329 1.066678 -0.252288  
H -5.259518 -1.265457 2.793862  
H -4.002912 1.074702 1.849323  
H -4.097973 -4.451834 -1.230855  
H -5.577097 -4.909750 -0.375069

H -5.866236 -3.553292 1.944514

H -3.625863 -1.726528 -2.350738

H -2.728537 0.556357 -2.347430

H -3.769090 1.993874 -0.530962

H -5.657401 -3.838633 -1.780837

Compound PDT<sub>C-N</sub>

O 1

N 1.356808 0.707155 0.573365  
C -4.081042 0.336718 0.949207  
O -4.341482 1.528507 1.137207  
C -3.008470 -0.408945 1.766030  
C 1.096272 2.383042 -1.305989  
C -4.510119 -1.867295 -0.146330  
C -5.062732 -2.108654 -1.555841  
C -6.245956 -1.125921 -1.631076  
C -5.763561 0.113109 -0.853560  
C -3.043113 -2.235749 0.048003  
C -1.917459 0.538487 2.333466  
C -0.748562 0.826435 1.431506  
C 0.494137 0.254674 1.560531  
C 0.660142 1.614018 -0.219437  
C -0.665674 1.710617 0.291072  
C -1.570271 2.595368 -0.325835  
C -1.141789 3.349713 -1.411588  
C 0.179071 3.246737 -1.894550  
N -2.411833 -1.496753 0.992314  
N -4.740787 -0.427444 0.056384  
O -2.502081 -3.137109 -0.588784  
H -3.545340 -0.826325 2.633463  
H 2.115685 2.313803 -1.670960  
H -5.095666 -2.444063 0.588558  
H -5.353094 -3.149981 -1.710331  
H -4.295071 -1.857647 -2.295472  
H -7.124714 -1.558408 -1.139529  
H -6.526649 -0.880333 -2.658555  
H -6.559636 0.605398 -0.286949  
H -5.305253 0.864485 -1.506958  
H -1.537527 0.087060 3.256466  
H -2.434722 1.460446 2.616301  
H 0.847396 -0.461960 2.290180  
H -2.586256 2.680368 0.046491  
H -1.833111 4.035049 -1.894955  
H 0.489639 3.855495 -2.739530  
H -1.416606 -1.660170 1.099554  
N 5.259044 -0.997053 -1.940452  
C 3.187533 -0.137795 -0.799451  
C 7.916480 -1.150499 0.656990  
C 6.682845 -0.992579 -0.181149  
C 6.548326 -1.273608 -1.518287  
C 4.527773 -0.528064 -0.873914  
C 5.395085 -0.512776 0.256543  
C 4.882918 -0.072616 1.489204  
C 3.559723 0.339613 1.571412  
C 2.716672 0.303755 0.436455



|   |          |           |           |
|---|----------|-----------|-----------|
| H | 4.913928 | -1.125835 | -2.879716 |
| H | 2.528304 | -0.191921 | -1.659576 |
| H | 7.754077 | -1.842854 | 1.493444  |
| H | 8.749271 | -1.539320 | 0.062038  |
| H | 7.279620 | -1.655734 | -2.217705 |
| H | 5.516089 | -0.040955 | 2.371856  |
| H | 3.159007 | 0.709255  | 2.510163  |
| H | 8.237153 | -0.195091 | 1.092582  |

Compound C-V

1 1

|   |           |           |           |
|---|-----------|-----------|-----------|
| N | 2.390732  | -1.819704 | -1.422595 |
| C | -1.008776 | 0.551870  | 1.251532  |
| O | -0.197445 | 1.319865  | 1.779028  |
| C | -0.945713 | -0.960549 | 1.542905  |
| C | 3.836111  | 0.234091  | -1.555774 |
| C | -3.002929 | 0.089168  | -0.185243 |
| C | -3.345418 | 0.815108  | -1.493051 |
| C | -3.234871 | 2.295983  | -1.084955 |
| C | -2.061525 | 2.340070  | -0.085488 |
| C | -2.579796 | -1.362179 | -0.323993 |
| C | 0.545899  | -1.380014 | 1.793450  |
| C | 1.424478  | -1.216982 | 0.619718  |
| C | 1.542912  | -2.192876 | -0.530695 |
| C | 2.909647  | -0.559881 | -0.953304 |
| C | 2.313732  | -0.191979 | 0.296969  |
| C | 2.667406  | 1.015553  | 0.947923  |
| C | 3.618429  | 1.835931  | 0.332323  |
| C | 4.186644  | 1.453287  | -0.881786 |
| N | -1.550420 | -1.760995 | 0.489326  |
| N | -1.966607 | 0.949522  | 0.402982  |
| O | -3.151157 | -2.130201 | -1.084283 |
| H | -1.445616 | -1.134175 | 2.507029  |
| H | 4.297364  | -0.029133 | -2.500840 |
| H | -3.887882 | 0.084951  | 0.470995  |
| H | -4.333305 | 0.539465  | -1.865838 |
| H | -2.605326 | 0.560458  | -2.259565 |
| H | -4.158645 | 2.618336  | -0.593097 |
| H | -3.064821 | 2.955626  | -1.939090 |
| H | -2.230382 | 3.026922  | 0.748602  |
| H | -1.111989 | 2.612101  | -0.558233 |
| H | 0.539869  | -2.435455 | 2.093546  |
| H | 0.897858  | -0.772637 | 2.628174  |
| H | 0.983796  | -3.119325 | -0.605294 |
| H | 2.195807  | 1.295638  | 1.882198  |
| H | 3.915654  | 2.768208  | 0.798024  |
| H | 4.926974  | 2.099349  | -1.343953 |
| H | -1.443865 | -2.768993 | 0.548216  |

Iron-Oxo Quartet FeO\_quartet

0 4

|    |           |           |           |
|----|-----------|-----------|-----------|
| Fe | 0.089141  | 0.036057  | -0.377911 |
| N  | 1.819494  | -0.979714 | -0.146250 |
| N  | -0.917496 | -1.709275 | -0.274068 |
| N  | 1.083957  | 1.774351  | -0.133367 |

|   |           |           |           |
|---|-----------|-----------|-----------|
| N | -1.657172 | 1.037712  | -0.294031 |
| C | 3.081401  | -0.442680 | -0.039450 |
| C | -2.283740 | -1.880043 | -0.331182 |
| C | 1.995090  | -2.338860 | -0.207619 |
| C | -0.378864 | -2.980953 | -0.309906 |
| C | 2.440098  | 1.939745  | -0.026959 |
| C | -2.917859 | 0.504666  | -0.369167 |
| C | 0.552637  | 3.037947  | -0.164823 |
| C | -1.825001 | 2.402919  | -0.311109 |
| C | 4.071808  | -1.491461 | -0.023063 |
| C | -2.610089 | -3.284464 | -0.372069 |
| C | 3.397629  | -2.668854 | -0.134568 |
| C | -1.431248 | -3.964519 | -0.364664 |
| C | 2.774252  | 3.342623  | 0.015773  |
| C | -3.906480 | 1.553781  | -0.424663 |
| C | 1.599634  | 4.026212  | -0.073553 |
| C | -3.227094 | 2.733367  | -0.389255 |
| H | 5.138437  | -1.328178 | 0.061663  |
| H | -3.617167 | -3.679288 | -0.410096 |
| H | 3.794198  | -3.675647 | -0.157896 |
| H | -1.269081 | -5.034293 | -0.392542 |
| H | 3.779796  | 3.733563  | 0.102573  |
| H | -4.974948 | 1.389913  | -0.480023 |
| H | 1.437863  | 5.096418  | -0.073688 |
| H | -3.621023 | 3.741304  | -0.409414 |
| C | 3.374694  | 0.911083  | 0.028832  |
| C | -3.216766 | -0.854725 | -0.375471 |
| C | -0.802078 | 3.337879  | -0.250908 |
| C | 0.973072  | -3.277374 | -0.299936 |
| H | 4.419583  | 1.191446  | 0.116024  |
| H | -4.263773 | -1.135122 | -0.431928 |
| H | -1.081791 | 4.386473  | -0.266560 |
| H | 1.257039  | -4.323926 | -0.342683 |
| O | 0.174206  | 0.077727  | -2.000977 |
| S | -0.029871 | -0.377906 | 2.210114  |
| C | -1.717070 | -0.057908 | 2.807120  |
| H | -2.414815 | -0.741276 | 2.308018  |
| H | -1.755821 | -0.254933 | 3.882505  |
| H | -2.027517 | 0.968924  | 2.599579  |

Iron-Hydroxo Triplet

0 3

|    |           |           |           |
|----|-----------|-----------|-----------|
| Fe | 0.057031  | 0.006037  | -0.226647 |
| N  | 0.974394  | -1.797923 | -0.242753 |
| N  | -1.731268 | -0.907687 | -0.220318 |
| N  | 1.856372  | 0.908100  | -0.084704 |
| N  | -0.852320 | 1.799772  | -0.277175 |
| C  | 2.329800  | -2.034563 | -0.206678 |
| C  | -2.960752 | -0.301749 | -0.339972 |
| C  | 0.367226  | -3.032337 | -0.203144 |
| C  | -1.968581 | -2.262094 | -0.209979 |
| C  | 3.088172  | 0.302557  | -0.085169 |
| C  | -2.199602 | 2.037186  | -0.378754 |
| C  | 2.088668  | 2.262332  | -0.048308 |
| C  | -0.244044 | 3.029094  | -0.224220 |

|   |           |           |           |
|---|-----------|-----------|-----------|
| C | 2.580119  | -3.454499 | -0.182363 |
| C | -3.998864 | -1.300172 | -0.375981 |
| C | 1.366010  | -4.071634 | -0.175489 |
| C | -3.385332 | -2.513778 | -0.289586 |
| C | 4.126445  | 1.301639  | -0.022854 |
| C | -2.448488 | 3.458318  | -0.407465 |
| C | 3.507320  | 2.514797  | 0.003547  |
| C | -1.237045 | 4.072641  | -0.307636 |
| H | 3.565438  | -3.902074 | -0.160285 |
| H | -5.055580 | -1.082119 | -0.462645 |
| H | 1.147003  | -5.131360 | -0.149657 |
| H | -3.833148 | -3.499210 | -0.293325 |
| H | 5.186599  | 1.083695  | -0.008209 |
| H | -3.429966 | 3.907778  | -0.487049 |
| H | 3.953478  | 3.500219  | 0.041649  |
| H | -1.015958 | 5.132094  | -0.290082 |
| C | 3.319890  | -1.065283 | -0.147197 |
| C | -3.189691 | 1.064480  | -0.417758 |
| C | 1.120128  | 3.254418  | -0.104192 |
| C | -1.000845 | -3.257576 | -0.181502 |
| H | 4.351412  | -1.401018 | -0.128845 |
| H | -4.218904 | 1.396951  | -0.503597 |
| H | 1.456901  | 4.285330  | -0.071754 |
| H | -1.340819 | -4.287758 | -0.163832 |
| O | 0.105832  | 0.052682  | -2.029855 |
| S | 0.134786  | 0.070941  | 2.082629  |
| C | -1.551017 | -0.093903 | 2.771846  |
| H | -1.987130 | -1.064516 | 2.525644  |
| H | -1.465322 | -0.001876 | 3.858606  |
| H | -2.198792 | 0.701402  | 2.395289  |
| H | 0.411430  | -0.826094 | -2.320515 |

Iron-Aqua Doublet

0 2

|    |           |           |           |
|----|-----------|-----------|-----------|
| Fe | -0.061810 | -0.012974 | -0.108940 |
| N  | -1.440696 | 1.471790  | -0.171790 |
| N  | 1.426825  | 1.340160  | -0.271464 |
| N  | -1.567654 | -1.350895 | -0.149754 |
| N  | 1.297105  | -1.480332 | -0.269235 |
| C  | -2.811606 | 1.352528  | -0.123321 |
| C  | 2.780244  | 1.098135  | -0.365256 |
| C  | -1.176848 | 2.822091  | -0.121987 |
| C  | 1.290574  | 2.709063  | -0.215092 |
| C  | -2.919623 | -1.107179 | -0.115452 |
| C  | 2.663493  | -1.361298 | -0.376448 |
| C  | -1.428734 | -2.716964 | -0.114451 |
| C  | 1.036251  | -2.828918 | -0.228404 |
| C  | -3.424222 | 2.657030  | -0.063240 |
| C  | 3.509577  | 2.342040  | -0.374909 |
| C  | -2.411019 | 3.567883  | -0.059073 |
| C  | 2.586833  | 3.340253  | -0.276853 |
| C  | -3.651620 | -2.351266 | -0.067339 |
| C  | 3.277292  | -2.667368 | -0.409065 |
| C  | -2.726705 | -3.350030 | -0.063671 |
| C  | 2.268486  | -3.577279 | -0.312873 |

|   |           |           |           |
|---|-----------|-----------|-----------|
| H | -4.491511 | 2.834722  | -0.025654 |
| H | 4.586746  | 2.423825  | -0.447020 |
| H | -2.475562 | 4.647925  | -0.018730 |
| H | 2.751516  | 4.410129  | -0.254024 |
| H | -4.731062 | -2.429621 | -0.039679 |
| H | 4.341759  | -2.845496 | -0.494230 |
| H | -2.888531 | -4.420111 | -0.034299 |
| H | 2.333066  | -4.658000 | -0.304806 |
| C | -3.508948 | 0.151165  | -0.110512 |
| C | 3.362852  | -0.161422 | -0.429642 |
| C | -0.224180 | -3.408337 | -0.145828 |
| C | 0.086616  | 3.400029  | -0.138759 |
| H | -4.592712 | 0.199035  | -0.073877 |
| H | 4.444266  | -0.212462 | -0.508450 |
| H | -0.271881 | -4.492591 | -0.120154 |
| H | 0.137795  | 4.483815  | -0.100804 |
| O | -0.145349 | 0.032792  | -2.296283 |
| S | -0.085960 | -0.034935 | 2.133451  |
| C | 1.638559  | 0.015887  | 2.746327  |
| H | 2.132588  | 0.951395  | 2.472574  |
| H | 1.591581  | -0.054151 | 3.837830  |
| H | 2.222347  | -0.824329 | 2.363104  |
| H | -0.898807 | 0.632536  | -2.442733 |
| H | 0.640921  | 0.566030  | -2.510789 |

Iron-Hydroxo Doublet Anion

-1 2

|    |           |           |           |
|----|-----------|-----------|-----------|
| Fe | 0.064821  | -0.001115 | -0.221145 |
| N  | 1.585262  | -1.345021 | -0.150582 |
| N  | -1.305723 | -1.489454 | -0.267154 |
| N  | 1.446338  | 1.486933  | -0.159251 |
| N  | -1.443693 | 1.345391  | -0.276697 |
| C  | 2.931596  | -1.096136 | -0.097124 |
| C  | -2.665785 | -1.371806 | -0.365284 |
| C  | 1.443391  | -2.708095 | -0.142425 |
| C  | -1.032427 | -2.830214 | -0.254517 |
| C  | 2.810444  | 1.370747  | -0.105622 |
| C  | -2.786159 | 1.094913  | -0.373573 |
| C  | 1.172035  | 2.829343  | -0.161717 |
| C  | -1.303741 | 2.706417  | -0.270540 |
| C  | 3.667576  | -2.341348 | -0.056227 |
| C  | -3.278135 | -2.683455 | -0.407602 |
| C  | 2.743649  | -3.342022 | -0.083157 |
| C  | -2.263598 | -3.589312 | -0.336544 |
| C  | 3.421566  | 2.682362  | -0.074348 |
| C  | -3.524068 | 2.339897  | -0.421777 |
| C  | 2.404506  | 3.587718  | -0.107798 |
| C  | -2.603301 | 3.341178  | -0.355152 |
| H  | 4.747013  | -2.419808 | -0.011309 |
| H  | -4.343201 | -2.866275 | -0.482376 |
| H  | 2.907871  | -4.412600 | -0.065784 |
| H  | -2.322694 | -4.670947 | -0.342212 |
| H  | 4.488240  | 2.865889  | -0.030976 |
| H  | -4.601947 | 2.417145  | -0.496777 |
| H  | 2.463382  | 4.669324  | -0.098415 |

|   |           |           |           |
|---|-----------|-----------|-----------|
| H | -2.767940 | 4.411805  | -0.365729 |
| C | 3.512974  | 0.169140  | -0.078506 |
| C | -3.365870 | -0.169537 | -0.418899 |
| C | -0.096751 | 3.399739  | -0.211639 |
| C | 0.236567  | -3.400673 | -0.190315 |
| H | 4.596912  | 0.222512  | -0.034853 |
| H | -4.448002 | -0.222606 | -0.497209 |
| H | -0.150258 | 4.484860  | -0.211157 |
| H | 0.290072  | -4.485778 | -0.183511 |
| O | 0.110636  | -0.002976 | -2.069830 |
| S | 0.066238  | -0.018863 | 2.182733  |
| C | -1.665805 | 0.046371  | 2.792667  |
| H | -2.255038 | -0.791062 | 2.406404  |
| H | -1.659807 | -0.008823 | 3.886918  |
| H | -2.159557 | 0.977055  | 2.495720  |
| H | 1.057433  | -0.012378 | -2.287687 |

Figure 11B Radical C2 TS

O 2

|   |           |           |           |
|---|-----------|-----------|-----------|
| N | 2.035711  | -0.920612 | 1.727039  |
| C | 2.372037  | -3.391249 | 1.368746  |
| C | 4.189336  | 0.763761  | -0.802561 |
| C | 3.379826  | -0.147172 | 0.065864  |
| C | 2.436656  | 0.243184  | 1.056341  |
| C | 2.556205  | -2.033040 | 1.103180  |
| C | 3.406556  | -1.572232 | 0.050721  |
| C | 4.089040  | -2.522830 | -0.737597 |
| C | 3.912805  | -3.875255 | -0.469107 |
| C | 3.063223  | -4.304924 | 0.571702  |
| H | 1.420774  | -0.942104 | 2.525591  |
| H | 1.719648  | -3.725291 | 2.170809  |
| H | 3.880152  | 0.715524  | -1.856614 |
| H | 4.103793  | 1.805800  | -0.482330 |
| H | 2.487971  | 1.165416  | 1.623048  |
| H | 4.742380  | -2.200202 | -1.543980 |
| H | 4.433374  | -4.615938 | -1.070007 |
| H | 2.944094  | -5.368648 | 0.758460  |
| H | 5.252058  | 0.488585  | -0.776539 |
| N | -0.479438 | 2.379289  | 1.571440  |
| C | -2.034364 | -1.179002 | -1.412882 |
| O | -1.542500 | -2.038164 | -2.145616 |
| C | -1.280255 | 0.095175  | -1.026703 |
| C | 0.104475  | 4.583270  | 0.515677  |
| C | -3.876945 | -0.259676 | 0.007742  |
| C | -4.967803 | -1.054993 | 0.738210  |
| C | -5.430459 | -2.063763 | -0.328185 |
| C | -4.139614 | -2.442450 | -1.075697 |
| C | -2.829692 | 0.381147  | 0.918333  |
| C | 0.258567  | -0.047518 | -0.992025 |
| C | 0.664288  | 0.984132  | 0.038824  |
| C | -0.432701 | 1.004446  | 1.109015  |
| C | 0.124195  | 3.194242  | 0.613673  |
| C | 0.838169  | 2.393779  | -0.317131 |
| C | 1.528179  | 3.014941  | -1.364245 |
| C | 1.513452  | 4.410286  | -1.468951 |

|   |           |           |           |
|---|-----------|-----------|-----------|
| C | 0.811586  | 5.182611  | -0.535799 |
| N | -1.615213 | 0.530045  | 0.344067  |
| N | -3.278971 | -1.263776 | -0.891117 |
| O | -3.083078 | 0.745757  | 2.069219  |
| H | -1.326120 | 2.675432  | 2.041597  |
| H | -1.560198 | 0.882542  | -1.742760 |
| H | -0.454851 | 5.185472  | 1.226517  |
| H | -4.335783 | 0.547580  | -0.586220 |
| H | -5.770313 | -0.410498 | 1.103314  |
| H | -4.528169 | -1.568296 | 1.600071  |
| H | -6.135602 | -1.585006 | -1.017051 |
| H | -5.926492 | -2.937394 | 0.102781  |
| H | -4.297250 | -2.639222 | -2.140295 |
| H | -3.650451 | -3.323245 | -0.642657 |
| H | 0.700225  | 0.126688  | -1.975135 |
| H | 0.523813  | -1.062237 | -0.677391 |
| H | -0.304464 | 0.327653  | 1.959040  |
| H | 2.061144  | 2.419589  | -2.100161 |
| H | 2.045030  | 4.895835  | -2.282438 |
| H | 0.804682  | 6.265389  | -0.629336 |

Figure 11B Radical C2 Product

O 2

|   |           |           |           |
|---|-----------|-----------|-----------|
| N | 2.021897  | -0.812981 | 1.380367  |
| C | 3.475741  | -2.854607 | 1.436932  |
| C | 3.688043  | 1.336042  | -1.270884 |
| C | 3.175283  | 0.298457  | -0.326469 |
| C | 2.050322  | 0.485176  | 0.678402  |
| C | 3.074558  | -1.614212 | 0.958229  |
| C | 3.747670  | -0.973253 | -0.128925 |
| C | 4.826988  | -1.641481 | -0.755068 |
| C | 5.221157  | -2.889476 | -0.278958 |
| C | 4.560355  | -3.488268 | 0.807315  |
| H | 1.800037  | -0.806017 | 2.367699  |
| H | 2.964921  | -3.323651 | 2.273540  |
| H | 3.195911  | 1.301554  | -2.254875 |
| H | 3.547794  | 2.349416  | -0.880310 |
| H | 2.298025  | 1.295207  | 1.385644  |
| H | 5.347447  | -1.180416 | -1.590059 |
| H | 6.052401  | -3.406840 | -0.750372 |
| H | 4.888869  | -4.459622 | 1.166566  |
| H | 4.759246  | 1.189607  | -1.454013 |
| N | -0.628700 | 1.996562  | 1.787857  |
| C | -2.056025 | -1.345315 | -1.463782 |
| O | -1.549091 | -2.096623 | -2.297401 |
| C | -1.359476 | -0.072008 | -0.975772 |
| C | -0.605075 | 4.291176  | 0.765246  |
| C | -3.879092 | -0.678104 | 0.111844  |
| C | -4.896036 | -1.600332 | 0.798199  |
| C | -5.351679 | -2.521613 | -0.347142 |
| C | -4.074839 | -2.755885 | -1.173090 |
| C | -2.829214 | -0.074632 | 1.043769  |
| C | 0.172643  | -0.127145 | -1.018184 |
| C | 0.620261  | 0.830730  | 0.102279  |
| C | -0.476397 | 0.673631  | 1.207300  |

|   |           |           |           |
|---|-----------|-----------|-----------|
| C | -0.298999 | 2.930872  | 0.798768  |
| C | 0.441997  | 2.316146  | -0.229516 |
| C | 0.840931  | 3.070035  | -1.327861 |
| C | 0.535405  | 4.438275  | -1.379740 |
| C | -0.173014 | 5.038487  | -0.336083 |
| N | -1.646763 | 0.190966  | 0.444607  |
| N | -3.270546 | -1.552544 | -0.907423 |
| O | -3.054254 | 0.163914  | 2.232917  |
| H | -1.481104 | 2.132029  | 2.320891  |
| H | -1.724799 | 0.766542  | -1.587790 |
| H | -1.178719 | 4.753052  | 1.564048  |
| H | -4.403600 | 0.158402  | -0.378316 |
| H | -5.713580 | -1.039776 | 1.256362  |
| H | -4.394655 | -2.172258 | 1.586202  |
| H | -6.105989 | -2.014621 | -0.959471 |
| H | -5.786580 | -3.458450 | 0.010712  |
| H | -4.264819 | -2.860542 | -2.245344 |
| H | -3.523013 | -3.644316 | -0.843321 |
| H | 0.560456  | 0.157519  | -1.998437 |
| H | 0.513263  | -1.143496 | -0.799963 |
| H | -0.252525 | -0.057497 | 1.984089  |
| H | 1.371184  | 2.609648  | -2.155130 |
| H | 0.845026  | 5.027509  | -2.237875 |
| H | -0.408703 | 6.098494  | -0.383328 |

Figure 11B Radical C3 TS

0 2

|   |           |           |           |
|---|-----------|-----------|-----------|
| N | 1.839883  | -2.633470 | 1.532976  |
| C | 3.492027  | -3.344098 | -0.234524 |
| C | 2.591438  | 0.876978  | 2.235670  |
| C | 2.155020  | -0.351744 | 1.458445  |
| C | 1.502361  | -1.434502 | 2.123310  |
| C | 2.814221  | -2.424904 | 0.569462  |
| C | 3.089023  | -1.035329 | 0.531812  |
| C | 4.111959  | -0.570329 | -0.298739 |
| C | 4.809425  | -1.481030 | -1.097377 |
| C | 4.493161  | -2.849822 | -1.070929 |
| H | 1.437641  | -3.529077 | 1.768168  |
| H | 3.259837  | -4.404780 | -0.199240 |
| H | 2.887521  | 1.689315  | 1.566225  |
| H | 1.787932  | 1.249816  | 2.877810  |
| H | 0.797672  | -1.405069 | 2.941892  |
| H | 4.363939  | 0.485654  | -0.324688 |
| H | 5.607927  | -1.128216 | -1.744005 |
| H | 5.044675  | -3.539788 | -1.703837 |
| H | 3.450043  | 0.634201  | 2.873558  |
| N | -0.266893 | 2.391172  | 1.215343  |
| C | -2.301233 | -1.352517 | -1.152531 |
| O | -1.956889 | -2.434305 | -1.631132 |
| C | -1.316991 | -0.203124 | -0.920506 |
| C | 0.810074  | 4.128833  | -0.246056 |
| C | -3.997217 | 0.208870  | -0.184103 |
| C | -5.300985 | -0.167547 | 0.533070  |
| C | -5.890870 | -1.259731 | -0.376613 |
| C | -4.662769 | -2.050947 | -0.860146 |

|   |           |           |           |
|---|-----------|-----------|-----------|
| C | -2.913375 | 0.796265  | 0.720554  |
| C | 0.143305  | -0.637826 | -0.680726 |
| C | 0.700853  | 0.474392  | 0.194302  |
| C | -0.457701 | 0.955743  | 1.084086  |
| C | 0.555552  | 2.826334  | 0.174214  |
| C | 1.172925  | 1.711173  | -0.449840 |
| C | 2.043836  | 1.923960  | -1.523597 |
| C | 2.307594  | 3.232078  | -1.950336 |
| C | 1.698620  | 4.319356  | -1.314873 |
| N | -1.653396 | 0.546363  | 0.303697  |
| N | -3.573210 | -1.064580 | -0.794504 |
| O | -3.178219 | 1.455580  | 1.729583  |
| H | -1.082752 | 2.930917  | 1.478728  |
| H | -1.367966 | 0.467138  | -1.792297 |
| H | 0.322051  | 4.974807  | 0.230694  |
| H | -4.204427 | 0.950434  | -0.972875 |
| H | -5.960550 | 0.693035  | 0.663026  |
| H | -5.067988 | -0.567989 | 1.525538  |
| H | -6.401815 | -0.801868 | -1.231279 |
| H | -6.612488 | -1.897384 | 0.140825  |
| H | -4.769085 | -2.437407 | -1.878142 |
| H | -4.429759 | -2.898583 | -0.204314 |
| H | 0.685205  | -0.754768 | -1.621031 |
| H | 0.147450  | -1.602195 | -0.164722 |
| H | -0.531050 | 0.489819  | 2.071215  |
| H | 2.503897  | 1.081234  | -2.031654 |
| H | 2.981453  | 3.401257  | -2.785645 |
| H | 1.905266  | 5.329701  | -1.658309 |

Figure 11B Radical C3 Product

0 2

|   |           |           |           |
|---|-----------|-----------|-----------|
| N | 2.161406  | -2.553138 | 1.589048  |
| C | 3.987615  | -3.136642 | -0.029161 |
| C | 2.564915  | 0.842287  | 2.098101  |
| C | 1.952142  | -0.223774 | 1.158170  |
| C | 1.433696  | -1.422899 | 1.939771  |
| C | 3.086421  | -2.272960 | 0.598340  |
| C | 3.042404  | -0.891966 | 0.306572  |
| C | 3.976169  | -0.361955 | -0.576248 |
| C | 4.897998  | -1.211365 | -1.209054 |
| C | 4.890081  | -2.584459 | -0.942566 |
| H | 1.987209  | -3.477400 | 1.955555  |
| H | 3.998785  | -4.198624 | 0.199725  |
| H | 2.988301  | 1.675172  | 1.526966  |
| H | 1.812886  | 1.249474  | 2.781242  |
| H | 0.981400  | -1.375383 | 2.923297  |
| H | 4.006007  | 0.704473  | -0.773827 |
| H | 5.622632  | -0.797338 | -1.904159 |
| H | 5.605121  | -3.234531 | -1.440082 |
| H | 3.366367  | 0.393486  | 2.693216  |
| N | -0.323586 | 2.244481  | 1.395226  |
| C | -2.246010 | -1.337030 | -1.249517 |
| O | -1.880554 | -2.349385 | -1.848358 |
| C | -1.285549 | -0.196774 | -0.900482 |
| C | 0.460821  | 4.099452  | -0.105727 |

|   |           |           |           |
|---|-----------|-----------|-----------|
| C | -3.970786 | 0.064898  | -0.103156 |
| C | -5.246928 | -0.427214 | 0.594132  |
| C | -5.822270 | -1.437199 | -0.414569 |
| C | -4.581698 | -2.129516 | -1.006346 |
| C | -2.891477 | 0.596809  | 0.838490  |
| C | 0.169930  | -0.632461 | -0.702492 |
| C | 0.761520  | 0.398408  | 0.286776  |
| C | -0.451285 | 0.808704  | 1.193984  |
| C | 0.377228  | 2.768431  | 0.303338  |
| C | 1.056117  | 1.743134  | -0.383417 |
| C | 1.787406  | 2.053693  | -1.525603 |
| C | 1.879403  | 3.387553  | -1.951231 |
| C | 1.226549  | 4.396590  | -1.239091 |
| N | -1.628352 | 0.415473  | 0.393146  |
| N | -3.519912 | -1.123041 | -0.850388 |
| O | -3.161443 | 1.160334  | 1.902322  |
| H | -1.171656 | 2.709542  | 1.700683  |
| H | -1.353797 | 0.557753  | -1.699032 |
| H | -0.068178 | 4.881749  | 0.431761  |
| H | -4.219052 | 0.876393  | -0.806624 |
| H | -5.929909 | 0.392947  | 0.825132  |
| H | -4.980990 | -0.920362 | 1.535310  |
| H | -6.369630 | -0.909692 | -1.203969 |
| H | -6.509071 | -2.151304 | 0.047276  |
| H | -4.699387 | -2.402852 | -2.059150 |
| H | -4.308225 | -3.037015 | -0.454747 |
| H | 0.715499  | -0.666167 | -1.647182 |
| H | 0.190473  | -1.633027 | -0.261932 |
| H | -0.503294 | 0.295303  | 2.154811  |
| H | 2.273418  | 1.271758  | -2.100988 |
| H | 2.450444  | 3.631533  | -2.842316 |
| H | 1.297264  | 5.427609  | -1.575999 |

Figure 11B Radical C4 TS

0 2

|   |          |           |           |
|---|----------|-----------|-----------|
| N | 1.620635 | -4.001210 | 0.629230  |
| C | 2.220096 | -3.150934 | -1.665412 |
| C | 2.447052 | -1.289044 | 3.023908  |
| C | 2.137057 | -2.168932 | 1.845743  |
| C | 1.707880 | -3.480784 | 1.902941  |
| C | 2.012995 | -3.042757 | -0.280583 |
| C | 2.316723 | -1.867312 | 0.453662  |
| C | 2.715423 | -0.676594 | -0.254214 |
| C | 3.075616 | -0.862760 | -1.634217 |
| C | 2.780541 | -2.039245 | -2.316459 |
| H | 1.370546 | -4.952881 | 0.405647  |
| H | 2.006109 | -4.071093 | -2.200993 |
| H | 3.527632 | -1.113459 | 3.115482  |
| H | 1.973948 | -0.303156 | 2.947642  |
| H | 1.467843 | -4.089735 | 2.763819  |
| H | 3.247593 | 0.087841  | 0.305776  |
| H | 3.527212 | -0.032211 | -2.169301 |
| H | 3.008859 | -2.111203 | -3.376812 |
| H | 2.110394 | -1.752856 | 3.957095  |
| N | 0.663978 | 1.696845  | 1.638795  |

|   |           |           |           |
|---|-----------|-----------|-----------|
| C | -2.436458 | -0.261094 | -1.592535 |
| O | -2.384917 | -0.960078 | -2.605491 |
| C | -1.258223 | 0.596067  | -1.124085 |
| C | 1.676579  | 3.913617  | 1.017803  |
| C | -3.599933 | 0.641960  | 0.428299  |
| C | -4.749711 | -0.011105 | 1.207509  |
| C | -5.693186 | -0.491863 | 0.090445  |
| C | -4.745558 | -0.964550 | -1.025845 |
| C | -2.260251 | 0.672878  | 1.165038  |
| C | 0.132812  | 0.067574  | -1.530985 |
| C | 1.028871  | 0.596874  | -0.427276 |
| C | 0.205790  | 0.554501  | 0.864929  |
| C | 1.290380  | 2.597295  | 0.774909  |
| C | 1.543028  | 1.971917  | -0.472553 |
| C | 2.196773  | 2.685614  | -1.481079 |
| C | 2.590307  | 4.007793  | -1.243653 |
| C | 2.331049  | 4.610550  | -0.007039 |
| N | -1.184320 | 0.650036  | 0.348741  |
| N | -3.529995 | -0.166889 | -0.802652 |
| O | -2.179521 | 0.734392  | 2.394643  |
| H | 0.040445  | 2.030865  | 2.364086  |
| H | -1.399122 | 1.611528  | -1.525046 |
| H | 1.468278  | 4.390115  | 1.971855  |
| H | -3.861415 | 1.682854  | 0.176904  |
| H | -5.220877 | 0.685999  | 1.903698  |
| H | -4.363263 | -0.856925 | 1.786016  |
| H | -6.307268 | 0.342344  | -0.267512 |
| H | -6.368471 | -1.286259 | 0.419016  |
| H | -5.138578 | -0.790389 | -2.031914 |
| H | -4.503945 | -2.031053 | -0.941975 |
| H | 0.420460  | 0.414935  | -2.524714 |
| H | 0.121289  | -1.026742 | -1.546593 |
| H | 0.284900  | -0.365873 | 1.447391  |
| H | 2.386169  | 2.223722  | -2.446689 |
| H | 3.094306  | 4.570155  | -2.024547 |
| H | 2.636453  | 5.639491  | 0.164146  |

Figure 11B Radical C4 Product

0 2

|   |          |           |           |
|---|----------|-----------|-----------|
| N | 2.339850 | -3.871873 | 0.285473  |
| C | 3.077094 | -2.534350 | -1.705250 |
| C | 1.876747 | -1.511342 | 3.099210  |
| C | 2.065900 | -2.205459 | 1.774932  |
| C | 2.066670 | -3.585487 | 1.599105  |
| C | 2.554862 | -2.696746 | -0.403707 |
| C | 2.343935 | -1.633887 | 0.498713  |
| C | 2.486395 | -0.203790 | 0.034136  |
| C | 3.299653 | -0.143072 | -1.243021 |
| C | 3.492699 | -1.226772 | -2.062895 |
| H | 2.473944 | -4.798775 | -0.091312 |
| H | 3.249502 | -3.382704 | -2.359777 |
| H | 0.830039 | -1.503755 | 3.430702  |
| H | 2.454888 | -2.008916 | 3.886351  |
| H | 1.899658 | -4.375727 | 2.317741  |
| H | 2.985331 | 0.390146  | 0.814203  |

|   |           |           |           |
|---|-----------|-----------|-----------|
| H | 3.673344  | 0.829744  | -1.545461 |
| H | 4.011680  | -1.088257 | -3.008901 |
| H | 2.207308  | -0.468982 | 3.054755  |
| N | 0.418714  | 1.710266  | 1.767619  |
| C | -2.242272 | -0.541080 | -1.636418 |
| O | -2.064050 | -1.250178 | -2.627615 |
| C | -1.165280 | 0.404467  | -1.096929 |
| C | 0.989047  | 4.055466  | 1.055934  |
| C | -3.617383 | 0.310075  | 0.269551  |
| C | -4.774272 | -0.410326 | 0.975202  |
| C | -5.594185 | -0.976580 | -0.197936 |
| C | -4.533720 | -1.398127 | -1.230293 |
| C | -2.343792 | 0.447253  | 1.103456  |
| C | 0.273889  | -0.042680 | -1.378492 |
| C | 1.096526  | 0.555259  | -0.218894 |
| C | 0.129640  | 0.508015  | 1.003518  |
| C | 0.889023  | 2.677067  | 0.869209  |
| C | 1.308950  | 2.066162  | -0.327968 |
| C | 1.815159  | 2.848950  | -1.359884 |
| C | 1.918767  | 4.237845  | -1.188042 |
| C | 1.512881  | 4.827289  | 0.011783  |
| N | -1.208670 | 0.489864  | 0.372104  |
| N | -3.397548 | -0.511597 | -0.934640 |
| O | -2.362333 | 0.529836  | 2.334625  |
| H | -0.297051 | 1.972439  | 2.436927  |
| H | -1.344590 | 1.399831  | -1.531387 |
| H | 0.657930  | 4.518922  | 1.981252  |
| H | -3.931051 | 1.325376  | -0.023322 |
| H | -5.344458 | 0.262901  | 1.618843  |
| H | -4.374286 | -1.216397 | 1.599465  |
| H | -6.237171 | -0.195378 | -0.619114 |
| H | -6.234299 | -1.812055 | 0.097488  |
| H | -4.861523 | -1.268733 | -2.266021 |
| H | -4.224360 | -2.442953 | -1.106223 |
| H | 0.618807  | 0.295770  | -2.356543 |
| H | 0.332821  | -1.134743 | -1.362420 |
| H | 0.219781  | -0.375793 | 1.629515  |
| H | 2.115236  | 2.397240  | -2.301419 |
| H | 2.309495  | 4.853914  | -1.992683 |
| H | 1.592068  | 5.904108  | 0.137229  |

Figure 11B Radical C5 TS

0 2

|   |           |           |           |
|---|-----------|-----------|-----------|
| N | -5.566010 | 0.067828  | -0.750328 |
| C | -3.454605 | 0.700912  | -1.990373 |
| C | -4.832501 | -3.102094 | 1.047864  |
| C | -4.862720 | -1.840573 | 0.238460  |
| C | -5.927209 | -0.991043 | 0.067570  |
| C | -4.252694 | -0.077585 | -1.125277 |
| C | -3.766090 | -1.271044 | -0.515001 |
| C | -2.448732 | -1.672261 | -0.752188 |
| C | -1.566897 | -0.813989 | -1.490162 |
| C | -2.154795 | 0.306253  | -2.202178 |
| H | -6.176279 | 0.822785  | -1.025463 |
| H | -3.867343 | 1.568247  | -2.499427 |

|   |           |           |           |
|---|-----------|-----------|-----------|
| H | -4.064844 | -3.062957 | 1.832136  |
| H | -5.796425 | -3.281852 | 1.535252  |
| H | -6.929326 | -1.051219 | 0.470160  |
| H | -2.068121 | -2.601321 | -0.336045 |
| H | -0.719156 | -1.296211 | -1.977442 |
| H | -1.526915 | 0.877519  | -2.879386 |
| H | -4.605915 | -3.979222 | 0.427063  |
| N | 0.370239  | 2.191987  | -0.782233 |
| C | 3.033387  | -1.588206 | 0.786701  |
| O | 2.865040  | -2.775631 | 1.068131  |
| C | 1.886553  | -0.574303 | 0.794455  |
| C | -0.928421 | 3.435362  | 0.975946  |
| C | 4.450511  | 0.349733  | 0.084470  |
| C | 5.747855  | 0.295457  | -0.733970 |
| C | 6.529909  | -0.847469 | -0.062876 |
| C | 5.448422  | -1.877127 | 0.310084  |
| C | 3.250176  | 0.937567  | -0.657262 |
| C | 0.495758  | -1.170169 | 0.492859  |
| C | -0.249851 | -0.002293 | -0.133561 |
| C | 0.783946  | 0.807292  | -0.931227 |
| C | -0.479647 | 2.290720  | 0.321110  |
| C | -0.896340 | 0.998166  | 0.725834  |
| C | -1.777322 | 0.862332  | 1.800922  |
| C | -2.236110 | 2.008060  | 2.462871  |
| C | -1.813846 | 3.277280  | 2.051555  |
| N | 2.057237  | 0.441918  | -0.260771 |
| N | 4.233375  | -1.060095 | 0.456805  |
| O | 3.369234  | 1.804301  | -1.526856 |
| H | 1.075567  | 2.898458  | -0.953090 |
| H | 1.873819  | -0.086820 | 1.781145  |
| H | -0.594050 | 4.422834  | 0.669273  |
| H | 4.605929  | 0.956180  | 0.991746  |
| H | 6.278617  | 1.249778  | -0.724339 |
| H | 5.511617  | 0.050567  | -1.775019 |
| H | 7.026897  | -0.481508 | 0.842661  |
| H | 7.296375  | -1.275343 | -0.714376 |
| H | 5.663680  | -2.414495 | 1.238490  |
| H | 5.293505  | -2.623200 | -0.478554 |
| H | 0.015751  | -1.549716 | 1.396973  |
| H | 0.606425  | -2.008434 | -0.205451 |
| H | 0.881116  | 0.552887  | -1.991896 |
| H | -2.101273 | -0.123659 | 2.122621  |
| H | -2.918971 | 1.910454  | 3.302204  |
| H | -2.171186 | 4.159557  | 2.576477  |

Figure 11B Radical C5 Product

0 2

|   |           |           |           |
|---|-----------|-----------|-----------|
| N | -5.707588 | -0.106556 | -0.984684 |
| C | -3.514493 | 0.747008  | -1.934977 |
| C | -4.888469 | -3.070003 | 1.101239  |
| C | -4.944779 | -1.862661 | 0.215120  |
| C | -6.064454 | -1.160100 | -0.159222 |
| C | -4.344925 | -0.109478 | -1.157341 |
| C | -3.817546 | -1.201966 | -0.414240 |
| C | -2.448342 | -1.453522 | -0.410841 |

|   |           |           |           |
|---|-----------|-----------|-----------|
| C | -1.486476 | -0.564979 | -1.162549 |
| C | -2.173712 | 0.531195  | -1.950510 |
| H | -6.350730 | 0.555945  | -1.391436 |
| H | -3.952497 | 1.553633  | -2.518845 |
| H | -4.265773 | -2.894119 | 1.988841  |
| H | -5.887756 | -3.353622 | 1.447858  |
| H | -7.101804 | -1.324991 | 0.098605  |
| H | -2.045811 | -2.311287 | 0.120373  |
| H | -0.918361 | -1.191505 | -1.880610 |
| H | -1.538564 | 1.179253  | -2.547167 |
| H | -4.458452 | -3.936931 | 0.581580  |
| N | 0.440190  | 2.192594  | -0.853279 |
| C | 2.945619  | -1.604629 | 0.806795  |
| O | 2.746688  | -2.765072 | 1.168401  |
| C | 1.826344  | -0.562040 | 0.744898  |
| C | -0.594181 | 3.503371  | 1.028183  |
| C | 4.411405  | 0.243809  | -0.024422 |
| C | 5.697867  | 0.098899  | -0.849304 |
| C | 6.454800  | -1.018436 | -0.109762 |
| C | 5.349277  | -1.989588 | 0.342068  |
| C | 3.223802  | 0.825641  | -0.789041 |
| C | 0.434089  | -1.139490 | 0.474653  |
| C | -0.340452 | 0.004862  | -0.222402 |
| C | 0.758799  | 0.783485  | -1.023731 |
| C | -0.305836 | 2.334251  | 0.323546  |
| C | -0.819854 | 1.090218  | 0.732157  |
| C | -1.636557 | 1.010413  | 1.853518  |
| C | -1.936942 | 2.178235  | 2.571118  |
| C | -1.416667 | 3.407428  | 2.157253  |
| N | 2.019981  | 0.369075  | -0.376936 |
| N | 4.157585  | -1.131678 | 0.440048  |
| O | 3.362002  | 1.657868  | -1.688826 |
| H | 1.204444  | 2.833371  | -1.036675 |
| H | 1.828609  | -0.007655 | 1.695942  |
| H | -0.189497 | 4.460917  | 0.711799  |
| H | 4.595711  | 0.901995  | 0.840492  |
| H | 6.254623  | 1.036435  | -0.908040 |
| H | 5.443984  | -0.208518 | -1.869469 |
| H | 6.972483  | -0.606876 | 0.764048  |
| H | 7.201326  | -1.510890 | -0.738279 |
| H | 5.558649  | -2.466591 | 1.304176  |
| H | 5.166973  | -2.784081 | -0.391378 |
| H | -0.049433 | -1.474747 | 1.393645  |
| H | 0.523382  | -2.003791 | -0.193005 |
| H | 0.816040  | 0.530400  | -2.085830 |
| H | -2.038898 | 0.053708  | 2.175041  |
| H | -2.571343 | 2.124434  | 3.451162  |
| H | -1.647894 | 4.307559  | 2.721269  |

Figure 11B Radical C6 TS

0 2

|   |          |           |           |
|---|----------|-----------|-----------|
| N | 2.477549 | -3.282471 | -1.302257 |
| C | 2.166737 | -0.851400 | -1.866568 |
| C | 4.390644 | -3.390378 | 1.883507  |
| C | 3.633059 | -3.060107 | 0.631191  |

|   |           |           |           |
|---|-----------|-----------|-----------|
| C | 3.097775  | -3.958546 | -0.268890 |
| C | 2.591307  | -1.922643 | -1.088909 |
| C | 3.325192  | -1.755535 | 0.125707  |
| C | 3.637505  | -0.436012 | 0.549181  |
| C | 3.197071  | 0.636479  | -0.186334 |
| C | 2.351196  | 0.475059  | -1.356326 |
| H | 1.997614  | -3.716455 | -2.076185 |
| H | 1.687045  | -1.011808 | -2.827452 |
| H | 3.892192  | -2.992834 | 2.777141  |
| H | 4.486321  | -4.473549 | 2.011726  |
| H | 3.113068  | -5.039917 | -0.252860 |
| H | 4.239408  | -0.278233 | 1.440938  |
| H | 3.438027  | 1.646188  | 0.132858  |
| H | 2.387242  | 1.275975  | -2.092673 |
| H | 5.403599  | -2.967323 | 1.869482  |
| N | 0.455305  | 1.530548  | 1.615077  |
| C | -2.854646 | -0.328476 | -1.434265 |
| O | -2.938866 | -0.623425 | -2.627473 |
| C | -1.833216 | 0.682897  | -0.907818 |
| C | 0.736354  | 4.028340  | 1.615968  |
| C | -3.538558 | -0.537764 | 0.961090  |
| C | -4.203914 | -1.746818 | 1.633697  |
| C | -5.293517 | -2.146752 | 0.623219  |
| C | -4.642629 | -1.903015 | -0.749574 |
| C | -2.089852 | -0.284999 | 1.380758  |
| C | -0.547084 | 0.796266  | -1.752134 |
| C | 0.499723  | 1.208446  | -0.730807 |
| C | 0.119804  | 0.546313  | 0.599983  |
| C | 0.611636  | 2.776056  | 1.016175  |
| C | 0.668703  | 2.627853  | -0.393237 |
| C | 0.866592  | 3.750732  | -1.200279 |
| C | 0.998397  | 5.011138  | -0.604483 |
| C | 0.932013  | 5.142145  | 0.787656  |
| N | -1.331592 | 0.291925  | 0.422648  |
| N | -3.650307 | -0.852311 | -0.475225 |
| O | -1.667490 | -0.566948 | 2.504686  |
| H | 0.020613  | 1.432517  | 2.523769  |
| H | -2.328604 | 1.663890  | -0.846167 |
| H | 0.677656  | 4.139695  | 2.695229  |
| H | -4.109326 | 0.377601  | 1.187919  |
| H | -4.597700 | -1.500191 | 2.621990  |
| H | -3.466595 | -2.547704 | 1.754548  |
| H | -6.170829 | -1.500748 | 0.741411  |
| H | -5.622880 | -3.182192 | 0.743170  |
| H | -5.351856 | -1.570319 | -1.513249 |
| H | -4.133691 | -2.795669 | -1.132953 |
| H | -0.660973 | 1.516232  | -2.565777 |
| H | -0.324026 | -0.181050 | -2.190973 |
| H | 0.611758  | -0.406465 | 0.815146  |
| H | 0.906104  | 3.649845  | -2.282554 |
| H | 1.148160  | 5.890243  | -1.224737 |
| H | 1.030097  | 6.125732  | 1.239796  |

Figure 11B Radical C6 Product

0 2

|   |           |           |           |
|---|-----------|-----------|-----------|
| N | 3.212186  | -3.043001 | -0.990506 |
| C | 2.002355  | -0.922575 | -1.536790 |
| C | 5.820712  | -2.174360 | 1.511190  |
| C | 4.697764  | -2.239450 | 0.516986  |
| C | 4.257976  | -3.373054 | -0.149783 |
| C | 2.943116  | -1.687385 | -0.881253 |
| C | 3.880748  | -1.166297 | 0.066564  |
| C | 3.852760  | 0.242500  | 0.335240  |
| C | 2.941450  | 1.043375  | -0.269118 |
| C | 1.880453  | 0.551684  | -1.233564 |
| H | 2.708484  | -3.693159 | -1.574506 |
| H | 1.367510  | -1.365541 | -2.297109 |
| H | 5.476279  | -1.818550 | 2.490707  |
| H | 6.274623  | -3.159887 | 1.657876  |
| H | 4.615723  | -4.391570 | -0.087667 |
| H | 4.579720  | 0.672219  | 1.021341  |
| H | 2.944071  | 2.108937  | -0.061099 |
| H | 1.999145  | 1.117619  | -2.177998 |
| H | 6.613890  | -1.489565 | 1.184292  |
| N | 0.234056  | 1.384904  | 1.607731  |
| C | -2.974968 | -0.585873 | -1.411653 |
| O | -3.080069 | -0.861515 | -2.607656 |
| C | -1.947857 | 0.420880  | -0.887118 |
| C | 0.086470  | 3.896370  | 1.535100  |
| C | -3.613374 | -0.836475 | 0.991838  |
| C | -4.245857 | -2.067142 | 1.657341  |
| C | -5.353808 | -2.461514 | 0.664735  |
| C | -4.737469 | -2.184752 | -0.717943 |
| C | -2.165382 | -0.560197 | 1.395006  |
| C | -0.685152 | 0.540830  | -1.745891 |
| C | 0.421688  | 0.975253  | -0.753845 |
| C | 0.007659  | 0.343774  | 0.615290  |
| C | 0.193099  | 2.625632  | 0.967619  |
| C | 0.336938  | 2.461398  | -0.422371 |
| C | 0.390248  | 3.571826  | -1.255276 |
| C | 0.287784  | 4.855761  | -0.698078 |
| C | 0.134898  | 5.006629  | 0.683001  |
| N | -1.417817 | 0.007188  | 0.421718  |
| N | -3.748103 | -1.130209 | -0.446160 |
| O | -1.735033 | -0.815426 | 2.522157  |
| H | -0.245544 | 1.259048  | 2.491864  |
| H | -2.445769 | 1.398608  | -0.797920 |
| H | -0.032445 | 4.021379  | 2.607840  |
| H | -4.196824 | 0.064106  | 1.244584  |
| H | -4.618713 | -1.844582 | 2.659263  |
| H | -3.496011 | -2.860900 | 1.744036  |
| H | -6.235403 | -1.828202 | 0.815147  |
| H | -5.668324 | -3.502816 | 0.772749  |
| H | -5.467592 | -1.843948 | -1.457965 |
| H | -4.229312 | -3.064517 | -1.130742 |
| H | -0.812822 | 1.256302  | -2.561407 |
| H | -0.468810 | -0.433801 | -2.187807 |
| H | 0.552111  | -0.564787 | 0.879051  |
| H | 0.500144  | 3.452460  | -2.330980 |
| H | 0.322016  | 5.730326  | -1.341140 |

|   |          |          |          |
|---|----------|----------|----------|
| H | 0.048921 | 6.003156 | 1.108717 |
|---|----------|----------|----------|

Figure 11B Radical C7 TS

O 2

|   |           |           |           |
|---|-----------|-----------|-----------|
| N | -2.892314 | 0.454058  | -1.848977 |
| C | -1.664756 | -1.556181 | -0.917054 |
| C | -6.416100 | 0.240288  | -0.687096 |
| C | -4.957892 | 0.094171  | -1.006261 |
| C | -4.180383 | 0.954574  | -1.741089 |
| C | -2.810016 | -0.723807 | -1.148817 |
| C | -4.089200 | -0.987566 | -0.606192 |
| C | -4.288594 | -2.157098 | 0.159709  |
| C | -3.206635 | -3.024440 | 0.353660  |
| C | -1.953171 | -2.766865 | -0.203632 |
| H | -2.086921 | 1.003447  | -2.124869 |
| H | -0.893341 | -1.602786 | -1.684137 |
| H | -6.595894 | 0.242032  | 0.395973  |
| H | -6.815600 | 1.176655  | -1.090529 |
| H | -4.444339 | 1.889337  | -2.216999 |
| H | -5.263719 | -2.387556 | 0.579917  |
| H | -3.353924 | -3.941201 | 0.919202  |
| H | -1.158631 | -3.497593 | -0.083118 |
| H | -7.011613 | -0.581723 | -1.106241 |
| N | -0.172638 | 1.747898  | -0.744439 |
| C | 3.321457  | -1.319006 | 0.793663  |
| O | 3.410660  | -2.493549 | 1.153293  |
| C | 2.014226  | -0.528146 | 0.893300  |
| C | -1.427957 | 2.960829  | 1.072083  |
| C | 4.256405  | 0.787461  | -0.176567 |
| C | 5.452465  | 0.920950  | -1.129165 |
| C | 6.501724  | -0.010902 | -0.497375 |
| C | 5.679816  | -1.196780 | 0.036970  |
| C | 2.895953  | 1.076692  | -0.810771 |
| C | 0.731562  | -1.384358 | 0.812287  |
| C | -0.277104 | -0.419688 | 0.217891  |
| C | 0.491782  | 0.451433  | -0.785599 |
| C | -0.864157 | 1.837437  | 0.475521  |
| C | -0.974520 | 0.553459  | 1.063036  |
| C | -1.677332 | 0.400940  | 2.261425  |
| C | -2.250963 | 1.524802  | 2.866136  |
| C | -2.123897 | 2.788270  | 2.276763  |
| N | 1.868063  | 0.413577  | -0.234477 |
| N | 4.355297  | -0.607980 | 0.290270  |
| O | 2.752416  | 1.860843  | -1.751761 |
| H | 0.389294  | 2.533510  | -1.054504 |
| H | 2.026187  | 0.029442  | 1.841697  |
| H | -1.327223 | 3.944636  | 0.621803  |
| H | 4.376808  | 1.476154  | 0.675490  |
| H | 5.789500  | 1.955636  | -1.220978 |
| H | 5.164855  | 0.569692  | -2.125814 |
| H | 7.007172  | 0.498220  | 0.331084  |
| H | 7.267033  | -0.330041 | -1.209671 |
| H | 6.087935  | -1.629386 | 0.955182  |
| H | 5.586588  | -2.003715 | -0.699815 |
| H | 0.437285  | -1.767581 | 1.791111  |



|   |           |           |           |
|---|-----------|-----------|-----------|
| H | 0.912609  | -2.242642 | 0.155853  |
| H | 0.533996  | 0.083953  | -1.816376 |
| H | -1.773466 | -0.579632 | 2.720230  |
| H | -2.795332 | 1.416949  | 3.799954  |
| H | -2.568985 | 3.654157  | 2.759705  |

Figure 11B Radical C7 Product  
0 2

|   |           |           |           |
|---|-----------|-----------|-----------|
| N | -2.749404 | 0.588212  | -1.668534 |
| C | -1.565597 | -1.344318 | -0.448539 |
| C | -6.417170 | 0.076139  | -1.457907 |
| C | -4.918690 | 0.058967  | -1.384589 |
| C | -4.052147 | 0.974734  | -1.932147 |
| C | -2.758327 | -0.553932 | -0.912675 |
| C | -4.097646 | -0.925722 | -0.723321 |
| C | -4.424894 | -2.085244 | 0.034263  |
| C | -3.365106 | -2.827857 | 0.596351  |
| C | -2.041640 | -2.496403 | 0.412502  |
| H | -1.936926 | 1.194460  | -1.762016 |
| H | -1.064385 | -1.785654 | -1.336005 |
| H | -6.874014 | 0.097266  | -0.459625 |
| H | -6.773922 | 0.956491  | -2.003054 |
| H | -4.253869 | 1.876710  | -2.493605 |
| H | -5.457615 | -2.378185 | 0.195308  |
| H | -3.599647 | -3.704781 | 1.196455  |
| H | -1.275981 | -3.136302 | 0.839368  |
| H | -6.813512 | -0.811619 | -1.968691 |
| N | -0.221474 | 1.738705  | -0.636559 |
| C | 3.265009  | -1.345483 | 0.722345  |
| O | 3.375754  | -2.501592 | 1.131233  |
| C | 1.955479  | -0.559142 | 0.829930  |
| C | -1.122259 | 2.970459  | 1.371492  |
| C | 4.148882  | 0.722686  | -0.370206 |
| C | 5.299978  | 0.817075  | -1.381510 |
| C | 6.381296  | -0.080969 | -0.754566 |
| C | 5.591017  | -1.243769 | -0.129188 |
| C | 2.761873  | 0.995064  | -0.949245 |
| C | 0.692749  | -1.423211 | 0.815087  |
| C | -0.410198 | -0.503686 | 0.234456  |
| C | 0.364911  | 0.407509  | -0.780747 |
| C | -0.742152 | 1.826195  | 0.673436  |
| C | -0.914196 | 0.543540  | 1.218969  |
| C | -1.487118 | 0.394305  | 2.476986  |
| C | -1.874960 | 1.536094  | 3.192069  |
| C | -1.688762 | 2.807414  | 2.641416  |
| N | 1.763706  | 0.321535  | -0.331895 |
| N | 4.273137  | -0.651105 | 0.149561  |
| O | 2.572698  | 1.778927  | -1.881969 |
| H | 0.378404  | 2.489460  | -0.965938 |
| H | 1.994204  | 0.040806  | 1.751782  |
| H | -0.982075 | 3.959768  | 0.944851  |
| H | 4.308826  | 1.446651  | 0.445510  |
| H | 5.626227  | 1.847740  | -1.535312 |
| H | 4.970707  | 0.418476  | -2.347076 |
| H | 6.920408  | 0.468277  | 0.025620  |

|   |           |           |           |
|---|-----------|-----------|-----------|
| H | 7.115785  | -0.430237 | -1.484844 |
| H | 6.040158  | -1.627900 | 0.791395  |
| H | 5.473071  | -2.086643 | -0.820606 |
| H | 0.447227  | -1.796289 | 1.810569  |
| H | 0.853750  | -2.287814 | 0.162045  |
| H | 0.309191  | 0.082203  | -1.823156 |
| H | -1.632271 | -0.594540 | 2.903601  |
| H | -2.318336 | 1.431485  | 4.177981  |
| H | -1.986750 | 3.687377  | 3.205323  |

Figure 11D Cation C2 TS  
1 1

|   |           |           |           |
|---|-----------|-----------|-----------|
| N | 1.501309  | -1.347979 | 1.780037  |
| C | 1.512447  | -3.761497 | 1.061592  |
| C | 4.287954  | 0.271535  | -0.064632 |
| C | 3.196383  | -0.595981 | 0.464102  |
| C | 2.200847  | -0.213198 | 1.396802  |
| C | 1.941693  | -2.427959 | 1.053326  |
| C | 3.001857  | -1.978597 | 0.206975  |
| C | 3.645507  | -2.903280 | -0.649772 |
| C | 3.225392  | -4.218768 | -0.636694 |
| C | 2.169474  | -4.639827 | 0.212388  |
| H | 0.806079  | -1.386188 | 2.511643  |
| H | 0.705626  | -4.093279 | 1.707043  |
| H | 4.479147  | 0.083232  | -1.126610 |
| H | 4.069154  | 1.332748  | 0.072551  |
| H | 2.228907  | 0.648161  | 2.050799  |
| H | 4.455409  | -2.582645 | -1.297907 |
| H | 3.704572  | -4.947439 | -1.282749 |
| H | 1.866686  | -5.682568 | 0.195750  |
| H | 5.222711  | 0.059943  | 0.472086  |
| N | -0.140728 | 2.607873  | 1.308266  |
| C | -2.153191 | -0.987562 | -1.305574 |
| O | -1.758441 | -1.992945 | -1.894588 |
| C | -1.231037 | 0.212866  | -1.058207 |
| C | 1.109938  | 4.511145  | 0.289322  |
| C | -3.868491 | 0.359024  | -0.080314 |
| C | -5.094182 | -0.163580 | 0.681296  |
| C | -5.669498 | -1.221125 | -0.277595 |
| C | -4.428616 | -1.884146 | -0.898948 |
| C | -2.760705 | 0.929862  | 0.801917  |
| C | 0.268358  | -0.165997 | -0.955231 |
| C | 0.772445  | 0.886741  | -0.007661 |
| C | -0.330496 | 1.203187  | 1.016424  |
| C | 0.755344  | 3.162176  | 0.450316  |
| C | 1.323677  | 2.145385  | -0.387144 |
| C | 2.200913  | 2.509504  | -1.435413 |
| C | 2.533155  | 3.840359  | -1.598411 |
| C | 1.997368  | 4.823959  | -0.729361 |
| N | -1.522401 | 0.861332  | 0.238639  |
| N | -3.404759 | -0.826399 | -0.827838 |
| O | -2.951750 | 1.420239  | 1.910785  |
| H | -0.731847 | 3.107768  | 1.956862  |
| H | -1.373910 | 0.933694  | -1.875078 |
| H | 0.686293  | 5.280500  | 0.926062  |

|   |           |           |           |
|---|-----------|-----------|-----------|
| H | -4.169516 | 1.151529  | -0.783799 |
| H | -5.798755 | 0.636247  | 0.917963  |
| H | -4.771723 | -0.620473 | 1.622696  |
| H | -6.266515 | -0.736990 | -1.058230 |
| H | -6.309295 | -1.946177 | 0.231333  |
| H | -4.576814 | -2.199618 | -1.935332 |
| H | -4.090653 | -2.755727 | -0.326372 |
| H | 0.764122  | -0.141847 | -1.925878 |
| H | 0.354804  | -1.176941 | -0.547304 |
| H | -0.333060 | 0.632262  | 1.946815  |
| H | 2.603795  | 1.751569  | -2.099368 |
| H | 3.204606  | 4.142205  | -2.395050 |
| H | 2.278544  | 5.862536  | -0.878243 |

Figure 11D Cation C2 Product

1 1

|   |           |           |           |
|---|-----------|-----------|-----------|
| N | 1.951542  | -1.052607 | 1.314640  |
| C | 3.289477  | -3.138505 | 1.097434  |
| C | 3.855563  | 1.499039  | -0.695683 |
| C | 3.253263  | 0.310277  | -0.032086 |
| C | 1.995487  | 0.313038  | 0.800080  |
| C | 2.967209  | -1.784065 | 0.852851  |
| C | 3.799507  | -0.956172 | 0.005730  |
| C | 4.978029  | -1.510591 | -0.590868 |
| C | 5.270753  | -2.822686 | -0.348182 |
| C | 4.425384  | -3.624314 | 0.492814  |
| H | 1.249585  | -1.393810 | 1.957627  |
| H | 2.667717  | -3.759710 | 1.732119  |
| H | 3.595585  | 1.515810  | -1.761963 |
| H | 3.512257  | 2.435856  | -0.256262 |
| H | 2.140954  | 1.006621  | 1.642475  |
| H | 5.609921  | -0.897258 | -1.224109 |
| H | 6.150728  | -3.280008 | -0.787126 |
| H | 4.703122  | -4.661149 | 0.657945  |
| H | 4.947068  | 1.452533  | -0.635366 |
| N | -0.547363 | 2.039664  | 1.738912  |
| C | -2.135124 | -1.349285 | -1.397643 |
| O | -1.639880 | -2.177932 | -2.161835 |
| C | -1.379458 | -0.086422 | -0.968517 |
| C | -0.371422 | 4.277740  | 0.603476  |
| C | -3.952377 | -0.485322 | 0.086085  |
| C | -5.050285 | -1.300084 | 0.784206  |
| C | -5.526611 | -2.256004 | -0.323898 |
| C | -4.241751 | -2.618995 | -1.087857 |
| C | -2.888918 | 0.091466  | 1.018151  |
| C | 0.148331  | -0.243963 | -0.980420 |
| C | 0.623207  | 0.722042  | 0.122290  |
| C | -0.505346 | 0.688709  | 1.210097  |
| C | -0.149918 | 2.905206  | 0.714133  |
| C | 0.558144  | 2.196241  | -0.274011 |
| C | 0.995296  | 2.853726  | -1.420334 |
| C | 0.772836  | 4.230135  | -1.548259 |
| C | 0.106596  | 4.930086  | -0.536809 |
| N | -1.678199 | 0.268238  | 0.429766  |
| N | -3.371937 | -1.451294 | -0.866898 |

|   |           |           |           |
|---|-----------|-----------|-----------|
| O | -3.106889 | 0.385451  | 2.193067  |
| H | -1.377775 | 2.262593  | 2.277487  |
| H | -1.681928 | 0.735331  | -1.633339 |
| H | -0.917946 | 4.818523  | 1.370274  |
| H | -4.400640 | 0.358171  | -0.463149 |
| H | -5.844392 | -0.662356 | 1.177857  |
| H | -4.615570 | -1.855097 | 1.622223  |
| H | -6.226196 | -1.739943 | -0.990753 |
| H | -6.032391 | -3.140595 | 0.071087  |
| H | -4.402066 | -2.777387 | -2.157969 |
| H | -3.756871 | -3.515825 | -0.684401 |
| H | 0.571278  | -0.005307 | -1.957886 |
| H | 0.410389  | -1.278995 | -0.745058 |
| H | -0.367159 | -0.014679 | 2.035004  |
| H | 1.487398  | 2.312693  | -2.223039 |
| H | 1.109249  | 4.750536  | -2.439409 |
| H | -0.063710 | 5.997519  | -0.645747 |

Figure 11D Cation C3 TS

1 1

|   |           |           |           |
|---|-----------|-----------|-----------|
| N | 1.502823  | -2.495214 | 1.567613  |
| C | 3.068634  | -3.503374 | -0.146769 |
| C | 2.707532  | 0.904036  | 2.192691  |
| C | 2.222280  | -0.346666 | 1.511318  |
| C | 1.341861  | -1.280837 | 2.112585  |
| C | 2.542659  | -2.472284 | 0.627468  |
| C | 3.039807  | -1.150849 | 0.597189  |
| C | 4.144184  | -0.859441 | -0.211850 |
| C | 4.689199  | -1.883313 | -0.987658 |
| C | 4.154196  | -3.183201 | -0.961960 |
| H | 0.944719  | -3.308828 | 1.799336  |
| H | 2.662955  | -4.509379 | -0.111606 |
| H | 3.020163  | 1.657160  | 1.462723  |
| H | 1.939059  | 1.344219  | 2.834156  |
| H | 0.610398  | -1.118461 | 2.892657  |
| H | 4.576110  | 0.136074  | -0.230072 |
| H | 5.547870  | -1.675543 | -1.618789 |
| H | 4.600793  | -3.956820 | -1.578742 |
| H | 3.577475  | 0.671487  | 2.817738  |
| N | -0.204073 | 2.508775  | 1.000737  |
| C | -2.358858 | -1.329471 | -1.080285 |
| O | -2.016551 | -2.455754 | -1.439328 |
| C | -1.357661 | -0.170491 | -0.984121 |
| C | 1.219011  | 4.097056  | -0.298961 |
| C | -4.016307 | 0.346984  | -0.250625 |
| C | -5.336727 | 0.073783  | 0.483187  |
| C | -5.939725 | -1.095504 | -0.315749 |
| C | -4.725739 | -1.959466 | -0.694398 |
| C | -2.920175 | 0.973751  | 0.609427  |
| C | 0.100312  | -0.630703 | -0.740406 |
| C | 0.644988  | 0.507298  | 0.086560  |
| C | -0.487154 | 1.087385  | 0.957775  |
| C | 0.765579  | 2.830294  | 0.100673  |
| C | 1.308391  | 1.640656  | -0.482282 |
| C | 2.279113  | 1.735060  | -1.503687 |

|   |           |           |           |
|---|-----------|-----------|-----------|
| C | 2.718834  | 2.986690  | -1.896098 |
| C | 2.193555  | 4.151028  | -1.286227 |
| N | -1.660614 | 0.695274  | 0.174425  |
| N | -3.618441 | -0.988527 | -0.738477 |
| O | -3.138966 | 1.674139  | 1.593820  |
| H | -0.841471 | 3.160367  | 1.436087  |
| H | -1.412284 | 0.414715  | -1.912563 |
| H | 0.809820  | 5.000948  | 0.139923  |
| H | -4.189386 | 1.020985  | -1.104638 |
| H | -5.978187 | 0.956950  | 0.510131  |
| H | -5.125756 | -0.222552 | 1.515995  |
| H | -6.429764 | -0.720306 | -1.220909 |
| H | -6.680648 | -1.658886 | 0.256790  |
| H | -4.830470 | -2.458985 | -1.661372 |
| H | -4.508813 | -2.725696 | 0.059239  |
| H | 0.642069  | -0.767069 | -1.676528 |
| H | 0.085056  | -1.586983 | -0.213586 |
| H | -0.587057 | 0.703866  | 1.973944  |
| H | 2.669789  | 0.837138  | -1.970413 |
| H | 3.463090  | 3.083547  | -2.679336 |
| H | 2.554010  | 5.122288  | -1.612959 |

Figure 11D Cation C3 Product

1 1

|   |           |           |           |
|---|-----------|-----------|-----------|
| N | 2.179513  | -2.543992 | 1.473199  |
| C | 4.140154  | -3.043660 | -0.036436 |
| C | 2.470277  | 0.742183  | 2.181264  |
| C | 1.939014  | -0.265376 | 1.120859  |
| C | 1.478722  | -1.510343 | 1.825871  |
| C | 3.184610  | -2.209827 | 0.526538  |
| C | 3.086601  | -0.832676 | 0.287164  |
| C | 4.043078  | -0.238789 | -0.530320 |
| C | 5.020347  | -1.052677 | -1.118891 |
| C | 5.064564  | -2.432959 | -0.886717 |
| H | 2.035935  | -3.482754 | 1.842409  |
| H | 4.175552  | -4.106343 | 0.178381  |
| H | 2.852917  | 1.623539  | 1.660691  |
| H | 1.679053  | 1.060250  | 2.862449  |
| H | 0.678934  | -1.602073 | 2.550422  |
| H | 4.047535  | 0.829844  | -0.707406 |
| H | 5.765866  | -0.598673 | -1.764054 |
| H | 5.834689  | -3.034672 | -1.357836 |
| H | 3.285869  | 0.297531  | 2.757521  |
| N | -0.302737 | 2.197058  | 1.410000  |
| C | -2.307586 | -1.351369 | -1.230663 |
| O | -1.946534 | -2.382760 | -1.798233 |
| C | -1.329188 | -0.217033 | -0.904300 |
| C | 0.509883  | 4.042366  | -0.090040 |
| C | -4.002037 | 0.102914  | -0.107344 |
| C | -5.299059 | -0.345969 | 0.580704  |
| C | -5.888891 | -1.354118 | -0.421414 |
| C | -4.661092 | -2.090354 | -0.984429 |
| C | -2.915527 | 0.607572  | 0.839979  |
| C | 0.118571  | -0.682850 | -0.716630 |
| C | 0.723236  | 0.339994  | 0.275239  |

|   |           |           |           |
|---|-----------|-----------|-----------|
| C | -0.477606 | 0.770154  | 1.195545  |
| C | 0.400588  | 2.712317  | 0.317260  |
| C | 1.049408  | 1.678814  | -0.383868 |
| C | 1.772403  | 1.969987  | -1.538036 |
| C | 1.887167  | 3.300735  | -1.959017 |
| C | 1.267412  | 4.321815  | -1.231271 |
| N | -1.651905 | 0.404801  | 0.388939  |
| N | -3.575770 | -1.104728 | -0.840756 |
| O | -3.161080 | 1.166434  | 1.908748  |
| H | -1.129655 | 2.684035  | 1.739100  |
| H | -1.388497 | 0.531353  | -1.707864 |
| H | 0.005911  | 4.835266  | 0.454547  |
| H | -4.216793 | 0.915690  | -0.819594 |
| H | -5.962178 | 0.495571  | 0.790865  |
| H | -5.058363 | -0.832676 | 1.531869  |
| H | -6.409834 | -0.823867 | -1.226330 |
| H | -6.601510 | -2.040961 | 0.041965  |
| H | -4.772877 | -2.383446 | -2.032107 |
| H | -4.414323 | -2.990266 | -0.408660 |
| H | 0.662022  | -0.717100 | -1.662036 |
| H | 0.112671  | -1.697521 | -0.305162 |
| H | -0.549477 | 0.264597  | 2.161421  |
| H | 2.227703  | 1.178907  | -2.125993 |
| H | 2.447715  | 3.535982  | -2.858273 |
| H | 1.358038  | 5.351296  | -1.566411 |

Figure 11D Cation C4 TS

1 1

|   |           |           |           |
|---|-----------|-----------|-----------|
| N | 0.892592  | -4.090827 | 0.529078  |
| C | 1.777601  | -3.249487 | -1.664431 |
| C | 2.018955  | -1.670858 | 3.109006  |
| C | 1.638789  | -2.416412 | 1.862048  |
| C | 0.977610  | -3.642429 | 1.812839  |
| C | 1.505138  | -3.178773 | -0.305179 |
| C | 1.961217  | -2.102077 | 0.513988  |
| C | 2.599192  | -0.983953 | -0.116549 |
| C | 2.961887  | -1.132875 | -1.495952 |
| C | 2.532515  | -2.212026 | -2.250864 |
| H | 0.475488  | -4.966373 | 0.243408  |
| H | 1.445933  | -4.093877 | -2.261628 |
| H | 3.098008  | -1.743778 | 3.294257  |
| H | 1.778683  | -0.603335 | 3.048373  |
| H | 0.578811  | -4.230334 | 2.628357  |
| H | 3.183952  | -0.310370 | 0.500948  |
| H | 3.548987  | -0.349503 | -1.964127 |
| H | 2.780881  | -2.270329 | -3.305071 |
| H | 1.503908  | -2.082405 | 3.981687  |
| N | 0.877277  | 1.634879  | 1.617970  |
| C | -2.382668 | -0.022189 | -1.613931 |
| O | -2.369497 | -0.762710 | -2.596614 |
| C | -1.138988 | 0.759152  | -1.172129 |
| C | 2.252593  | 3.653000  | 1.067768  |
| C | -3.466295 | 1.038283  | 0.374059  |
| C | -4.680223 | 0.525629  | 1.160966  |
| C | -5.652649 | 0.091806  | 0.049634  |

|   |           |           |           |
|---|-----------|-----------|-----------|
| C | -4.743264 | -0.512439 | -1.033525 |
| C | -2.136050 | 0.951946  | 1.120530  |
| C | 0.194203  | 0.087720  | -1.573359 |
| C | 1.106517  | 0.527238  | -0.451602 |
| C | 0.278622  | 0.566843  | 0.843150  |
| C | 1.664338  | 2.408851  | 0.802674  |
| C | 1.839407  | 1.771535  | -0.461240 |
| C | 2.601426  | 2.395657  | -1.466521 |
| C | 3.179385  | 3.627205  | -1.203173 |
| C | 3.004446  | 4.240982  | 0.057713  |
| N | -1.056540 | 0.847374  | 0.299980  |
| N | -3.462614 | 0.187713  | -0.832449 |
| O | -2.036173 | 0.985581  | 2.344621  |
| H | 0.386834  | 1.992808  | 2.427448  |
| H | -1.192480 | 1.768660  | -1.603507 |
| H | 2.116861  | 4.142278  | 2.026787  |
| H | -3.617183 | 2.091681  | 0.089283  |
| H | -5.090898 | 1.291741  | 1.821788  |
| H | -4.381381 | -0.328306 | 1.777853  |
| H | -6.181823 | 0.964177  | -0.349233 |
| H | -6.401637 | -0.622250 | 0.400857  |
| H | -5.109518 | -0.348997 | -2.050759 |
| H | -4.594019 | -1.590177 | -0.898215 |
| H | 0.536205  | 0.414023  | -2.555652 |
| H | 0.061352  | -0.997003 | -1.598591 |
| H | 0.239111  | -0.356026 | 1.423676  |
| H | 2.728410  | 1.922409  | -2.435738 |
| H | 3.767317  | 4.127582  | -1.965340 |
| H | 3.466323  | 5.206774  | 0.241523  |

Figure 11D Cation C4 Product

1 1

|   |           |           |           |
|---|-----------|-----------|-----------|
| N | 2.499813  | -3.824961 | 0.324475  |
| C | 3.240414  | -2.474241 | -1.628323 |
| C | 1.887050  | -1.440664 | 3.087033  |
| C | 2.117435  | -2.110956 | 1.761675  |
| C | 2.179529  | -3.516193 | 1.589501  |
| C | 2.690420  | -2.646430 | -0.383976 |
| C | 2.400054  | -1.561244 | 0.508659  |
| C | 2.491217  | -0.157926 | -0.000060 |
| C | 3.235531  | -0.069695 | -1.295293 |
| C | 3.540679  | -1.145604 | -2.069769 |
| H | 2.642710  | -4.761672 | -0.032626 |
| H | 3.494956  | -3.325280 | -2.253717 |
| H | 0.883857  | -1.646843 | 3.477791  |
| H | 2.604844  | -1.809441 | 3.827986  |
| H | 2.026842  | -4.290485 | 2.329839  |
| H | 2.978562  | 0.478424  | 0.749469  |
| H | 3.472110  | 0.927466  | -1.649524 |
| H | 4.029522  | -1.013981 | -3.028695 |
| H | 2.003283  | -0.356717 | 3.016504  |
| N | 0.418483  | 1.663886  | 1.763658  |
| C | -2.251115 | -0.616107 | -1.626793 |
| O | -2.046003 | -1.355735 | -2.589684 |
| C | -1.197493 | 0.376585  | -1.121254 |

|   |           |           |           |
|---|-----------|-----------|-----------|
| C | 0.930396  | 4.033836  | 1.089736  |
| C | -3.629823 | 0.262390  | 0.261565  |
| C | -4.788755 | -0.440914 | 0.980792  |
| C | -5.597000 | -1.049603 | -0.179118 |
| C | -4.526932 | -1.502278 | -1.187023 |
| C | -2.355250 | 0.412965  | 1.091204  |
| C | 0.248118  | -0.042681 | -1.419201 |
| C | 1.057218  | 0.571821  | -0.260453 |
| C | 0.109213  | 0.485756  | 0.974583  |
| C | 0.850327  | 2.657944  | 0.877039  |
| C | 1.246130  | 2.082563  | -0.345845 |
| C | 1.703295  | 2.894887  | -1.380464 |
| C | 1.783943  | 4.278602  | -1.180719 |
| C | 1.406325  | 4.833864  | 0.046531  |
| N | -1.224347 | 0.485088  | 0.346354  |
| N | -3.402703 | -0.588546 | -0.923013 |
| O | -2.352352 | 0.477456  | 2.320872  |
| H | -0.273033 | 1.900120  | 2.467776  |
| H | -1.408249 | 1.357324  | -1.571951 |
| H | 0.619382  | 4.471833  | 2.033510  |
| H | -3.938922 | 1.270974  | -0.056546 |
| H | -5.367264 | 0.250911  | 1.596478  |
| H | -4.390612 | -1.223584 | 1.635052  |
| H | -6.239261 | -0.286367 | -0.632418 |
| H | -6.235637 | -1.877045 | 0.140149  |
| H | -4.847910 | -1.419442 | -2.229189 |
| H | -4.205314 | -2.536578 | -1.015837 |
| H | 0.575917  | 0.311442  | -2.397865 |
| H | 0.319473  | -1.134482 | -1.417442 |
| H | 0.200347  | -0.412917 | 1.579446  |
| H | 1.973907  | 2.475251  | -2.345928 |
| H | 2.132890  | 4.920296  | -1.983649 |
| H | 1.470196  | 5.908690  | 0.191401  |

Figure 11D Cation C5 TS

1 1

|   |           |           |           |
|---|-----------|-----------|-----------|
| N | -5.209632 | 0.262283  | -0.586504 |
| C | -3.203395 | 0.840413  | -1.976389 |
| C | -4.627184 | -3.106813 | 0.887129  |
| C | -4.614109 | -1.782017 | 0.187942  |
| C | -5.597134 | -0.833208 | 0.186381  |
| C | -3.976616 | 0.047186  | -1.101810 |
| C | -3.546267 | -1.243534 | -0.632385 |
| C | -2.301151 | -1.707898 | -1.016250 |
| C | -1.454746 | -0.860671 | -1.786322 |
| C | -1.968702 | 0.359614  | -2.342749 |
| H | -5.777610 | 1.083321  | -0.746843 |
| H | -3.585522 | 1.780169  | -2.362403 |
| H | -3.799807 | -3.193684 | 1.602521  |
| H | -5.561637 | -3.249195 | 1.437454  |
| H | -6.561623 | -0.834086 | 0.674360  |
| H | -1.941769 | -2.682704 | -0.699706 |
| H | -0.577471 | -1.302144 | -2.248819 |
| H | -1.352023 | 0.925162  | -3.032984 |
| H | -4.526682 | -3.936026 | 0.176185  |

|   |           |           |           |
|---|-----------|-----------|-----------|
| N | 0.212167  | 2.155357  | -0.599177 |
| C | 3.064318  | -1.597984 | 0.666610  |
| O | 2.941516  | -2.816807 | 0.780964  |
| C | 1.864309  | -0.652221 | 0.798628  |
| C | -1.371289 | 3.180726  | 1.038707  |
| C | 4.373960  | 0.491170  | 0.248974  |
| C | 5.701164  | 0.624974  | -0.510089 |
| C | 6.525615  | -0.557286 | 0.029508  |
| C | 5.497739  | -1.688511 | 0.199805  |
| C | 3.162285  | 1.087500  | -0.463797 |
| C | 0.515217  | -1.300054 | 0.400845  |
| C | -0.245062 | -0.095669 | -0.107465 |
| C | 0.745076  | 0.829190  | -0.832893 |
| C | -0.741248 | 2.118853  | 0.373120  |
| C | -1.049099 | 0.759509  | 0.704185  |
| C | -1.973371 | 0.475660  | 1.734178  |
| C | -2.581684 | 1.527568  | 2.395690  |
| C | -2.282206 | 2.863342  | 2.037875  |
| N | 1.982266  | 0.503264  | -0.116804 |
| N | 4.232324  | -0.967634 | 0.425187  |
| O | 3.227386  | 2.015536  | -1.264898 |
| H | 0.721965  | 2.979367  | -0.886630 |
| H | 1.813658  | -0.299732 | 1.838190  |
| H | -1.139534 | 4.211872  | 0.793522  |
| H | 4.449869  | 0.981310  | 1.232721  |
| H | 6.171736  | 1.595531  | -0.340323 |
| H | 5.519506  | 0.519766  | -1.584766 |
| H | 6.963572  | -0.299222 | 1.000007  |
| H | 7.340634  | -0.842364 | -0.640232 |
| H | 5.713278  | -2.349326 | 1.043872  |
| H | 5.407519  | -2.308657 | -0.699634 |
| H | 0.031034  | -1.787954 | 1.247248  |
| H | 0.690544  | -2.048660 | -0.375847 |
| H | 0.887564  | 0.661779  | -1.902258 |
| H | -2.193115 | -0.551810 | 2.003906  |
| H | -3.290257 | 1.334059  | 3.193926  |
| H | -2.773446 | 3.671477  | 2.572534  |

Figure 11D Cation C5 Product

1 1

|   |           |           |           |
|---|-----------|-----------|-----------|
| N | -5.647849 | -0.163982 | -1.064375 |
| C | -3.500934 | 0.740552  | -1.956776 |
| C | -4.894590 | -3.074322 | 1.141437  |
| C | -4.942774 | -1.893042 | 0.225743  |
| C | -6.037991 | -1.219164 | -0.210976 |
| C | -4.324256 | -0.131559 | -1.192630 |
| C | -3.798900 | -1.219538 | -0.384328 |
| C | -2.456582 | -1.414697 | -0.332673 |
| C | -1.518574 | -0.539144 | -1.089870 |
| C | -2.160947 | 0.538712  | -1.905149 |
| H | -6.294610 | 0.473339  | -1.515326 |
| H | -3.939724 | 1.530300  | -2.557389 |
| H | -4.317288 | -2.850763 | 2.046276  |
| H | -5.901210 | -3.371654 | 1.446142  |
| H | -7.086674 | -1.376641 | -0.005002 |

|   |           |           |           |
|---|-----------|-----------|-----------|
| H | -2.035003 | -2.228748 | 0.249905  |
| H | -1.003861 | -1.209824 | -1.804330 |
| H | -1.499965 | 1.188129  | -2.468717 |
| H | -4.418714 | -3.933438 | 0.654255  |
| N | 0.411151  | 2.171135  | -0.902376 |
| C | 2.930070  | -1.608562 | 0.817419  |
| O | 2.713867  | -2.766109 | 1.176857  |
| C | 1.821497  | -0.550925 | 0.777156  |
| C | -0.570374 | 3.548170  | 0.963059  |
| C | 4.396394  | 0.225560  | -0.041922 |
| C | 5.677309  | 0.072355  | -0.874022 |
| C | 6.431205  | -1.050119 | -0.139169 |
| C | 5.322973  | -2.015876 | 0.315540  |
| C | 3.204720  | 0.803108  | -0.802065 |
| C | 0.421922  | -1.128088 | 0.538595  |
| C | -0.343655 | 0.013358  | -0.170655 |
| C | 0.746260  | 0.759845  | -1.015439 |
| C | -0.300573 | 2.356339  | 0.289966  |
| C | -0.805694 | 1.130001  | 0.756669  |
| C | -1.594022 | 1.084204  | 1.900962  |
| C | -1.873019 | 2.274665  | 2.585310  |
| C | -1.361803 | 3.488679  | 2.114921  |
| N | 1.999859  | 0.370399  | -0.353815 |
| N | 4.138339  | -1.147837 | 0.431055  |
| O | 3.324239  | 1.606783  | -1.726776 |
| H | 1.163233  | 2.810349  | -1.137089 |
| H | 1.846015  | 0.006585  | 1.725035  |
| H | -0.173798 | 4.493987  | 0.605835  |
| H | 4.585667  | 0.887280  | 0.818737  |
| H | 6.239544  | 1.006379  | -0.934107 |
| H | 5.416362  | -0.232292 | -1.893098 |
| H | 6.955170  | -0.643242 | 0.732794  |
| H | 7.171380  | -1.545374 | -0.772529 |
| H | 5.535184  | -2.500659 | 1.272690  |
| H | 5.126546  | -2.802344 | -0.422599 |
| H | -0.048612 | -1.432863 | 1.475099  |
| H | 0.499505  | -2.011127 | -0.104720 |
| H | 0.800100  | 0.467323  | -2.067675 |
| H | -1.982723 | 0.140223  | 2.275221  |
| H | -2.480487 | 2.252143  | 3.484775  |
| H | -1.577357 | 4.406476  | 2.655127  |

Figure 11D Cation C6 TS

1 1

|   |          |           |           |
|---|----------|-----------|-----------|
| N | 1.379894 | -3.637013 | -1.373907 |
| C | 1.821328 | -1.235931 | -1.944873 |
| C | 3.139838 | -4.283304 | 1.837828  |
| C | 2.536687 | -3.741532 | 0.576205  |
| C | 1.760788 | -4.442501 | -0.338054 |
| C | 1.898664 | -2.372763 | -1.170144 |
| C | 2.642216 | -2.421301 | 0.061929  |
| C | 3.320239 | -1.254113 | 0.498758  |
| C | 3.220312 | -0.104315 | -0.246637 |
| C | 2.415827 | -0.043266 | -1.442852 |
| H | 0.812567 | -3.924355 | -2.159092 |

|   |           |           |           |
|---|-----------|-----------|-----------|
| H | 1.316476  | -1.239775 | -2.905585 |
| H | 2.770154  | -3.748907 | 2.721254  |
| H | 2.898096  | -5.342637 | 1.963479  |
| H | 1.457412  | -5.480661 | -0.313096 |
| H | 3.913588  | -1.274587 | 1.407704  |
| H | 3.732973  | 0.796623  | 0.074403  |
| H | 2.628675  | 0.743028  | -2.160472 |
| H | 4.232254  | -4.187711 | 1.833871  |
| N | 0.856189  | 1.366652  | 1.603421  |
| C | -2.840085 | 0.402586  | -1.391288 |
| O | -3.000248 | 0.208750  | -2.595803 |
| C | -1.621545 | 1.162492  | -0.851927 |
| C | 1.912636  | 3.628959  | 1.704735  |
| C | -3.479274 | 0.169408  | 1.016139  |
| C | -4.358255 | -0.921963 | 1.642260  |
| C | -5.533341 | -1.025757 | 0.653863  |
| C | -4.885486 | -0.829530 | -0.727306 |
| C | -2.000253 | 0.091164  | 1.387074  |
| C | -0.370407 | 1.043793  | -1.755959 |
| C | 0.741080  | 1.168523  | -0.732113 |
| C | 0.284477  | 0.518083  | 0.577509  |
| C | 1.381873  | 2.497805  | 1.063005  |
| C | 1.317859  | 2.428317  | -0.364505 |
| C | 1.768525  | 3.510759  | -1.147381 |
| C | 2.283517  | 4.625237  | -0.510648 |
| C | 2.355020  | 4.671782  | 0.903838  |
| N | -1.170401 | 0.601116  | 0.437855  |
| N | -3.691223 | -0.017702 | -0.432439 |
| O | -1.587841 | -0.370302 | 2.447562  |
| H | 0.725152  | 1.182685  | 2.587708  |
| H | -1.895665 | 2.219484  | -0.727410 |
| H | 1.964765  | 3.685832  | 2.786908  |
| H | -3.839473 | 1.164888  | 1.321077  |
| H | -4.666397 | -0.664652 | 2.657624  |
| H | -3.797401 | -1.861530 | 1.686459  |
| H | -6.257926 | -0.226641 | 0.845105  |
| H | -6.061040 | -1.979895 | 0.726558  |
| H | -5.531074 | -0.310172 | -1.440897 |
| H | -4.576453 | -1.778114 | -1.181795 |
| H | -0.336606 | 1.825350  | -2.515943 |
| H | -0.388192 | 0.075090  | -2.254470 |
| H | 0.586660  | -0.521057 | 0.734806  |
| H | 1.718772  | 3.463195  | -2.231372 |
| H | 2.637675  | 5.470995  | -1.090336 |
| H | 2.765062  | 5.558780  | 1.378192  |

Figure 11D Cation C6 Product

1 1

|   |          |           |           |
|---|----------|-----------|-----------|
| N | 3.408693 | -3.005977 | -0.939452 |
| C | 2.053440 | -0.970920 | -1.398005 |
| C | 6.033981 | -1.979417 | 1.484378  |
| C | 4.882407 | -2.082431 | 0.529516  |
| C | 4.474648 | -3.245005 | -0.154230 |
| C | 3.052001 | -1.664323 | -0.808390 |
| C | 3.996354 | -1.078262 | 0.124837  |

|   |           |           |           |
|---|-----------|-----------|-----------|
| C | 3.878330  | 0.310349  | 0.440239  |
| C | 2.882710  | 1.037455  | -0.125871 |
| C | 1.887275  | 0.481015  | -1.098684 |
| H | 2.941379  | -3.690966 | -1.519809 |
| H | 1.389910  | -1.447578 | -2.110866 |
| H | 5.697763  | -1.661297 | 2.477523  |
| H | 6.538637  | -2.942927 | 1.593274  |
| H | 4.911716  | -4.234404 | -0.106518 |
| H | 4.578348  | 0.769932  | 1.130242  |
| H | 2.785547  | 2.091581  | 0.107871  |
| H | 2.065656  | 1.000661  | -2.060092 |
| H | 6.773451  | -1.249310 | 1.136897  |
| N | 0.177992  | 1.414163  | 1.598650  |
| C | -2.947730 | -0.723520 | -1.426272 |
| O | -2.970913 | -1.104816 | -2.596910 |
| C | -1.961199 | 0.341614  | -0.934745 |
| C | -0.004084 | 3.919403  | 1.407065  |
| C | -3.708189 | -0.778640 | 0.953976  |
| C | -4.381505 | -1.948959 | 1.685247  |
| C | -5.431333 | -2.432229 | 0.668820  |
| C | -4.738131 | -2.273312 | -0.695260 |
| C | -2.278180 | -0.480786 | 1.401304  |
| C | -0.662961 | 0.405913  | -1.748730 |
| C | 0.391645  | 0.900705  | -0.731137 |
| C | -0.069004 | 0.335500  | 0.653666  |
| C | 0.125706  | 2.624596  | 0.902021  |
| C | 0.291895  | 2.399057  | -0.476163 |
| C | 0.347437  | 3.467312  | -1.364956 |
| C | 0.220086  | 4.771137  | -0.869504 |
| C | 0.044457  | 4.984904  | 0.502525  |
| N | -1.491079 | 0.036762  | 0.425616  |
| N | -3.769180 | -1.189200 | -0.461872 |
| O | -1.880476 | -0.675783 | 2.549978  |
| H | -0.295920 | 1.327302  | 2.491272  |
| H | -2.470952 | 1.315998  | -0.947957 |
| H | -0.139409 | 4.094207  | 2.470280  |
| H | -4.294332 | 0.142794  | 1.100847  |
| H | -4.811618 | -1.640823 | 2.640351  |
| H | -3.639679 | -2.729683 | 1.884632  |
| H | -6.320705 | -1.793942 | 0.714074  |
| H | -5.749956 | -3.462009 | 0.848926  |
| H | -5.424521 | -2.003515 | -1.502847 |
| H | -4.203194 | -3.180952 | -0.999167 |
| H | -0.750634 | 1.075766  | -2.606406 |
| H | -0.445116 | -0.592752 | -2.132576 |
| H | 0.438414  | -0.574915 | 0.980758  |
| H | 0.477162  | 3.299686  | -2.431696 |
| H | 0.252632  | 5.615199  | -1.551273 |
| H | -0.058778 | 5.999543  | 0.877244  |

Figure 11D Cation C7 TS

1 1

|   |          |           |           |
|---|----------|-----------|-----------|
| N | 2.280527 | -2.430600 | -0.931170 |
| C | 1.526461 | -0.246925 | -1.968903 |
| C | 5.685665 | -1.855176 | 0.455900  |

|   |           |           |           |   |           |           |           |
|---|-----------|-----------|-----------|---|-----------|-----------|-----------|
| C | 4.328822  | -1.825683 | -0.178965 | 1 | 1         |           |           |
| C | 3.425651  | -2.851075 | -0.256926 | N | 2.749700  | -0.468795 | -1.547095 |
| C | 2.424075  | -1.133962 | -1.302518 | C | 1.592525  | 1.327498  | -0.154347 |
| C | 3.711355  | -0.709713 | -0.860570 | C | 6.406364  | 0.244425  | -1.669374 |
| C | 4.146175  | 0.568985  | -1.209667 | C | 4.924449  | 0.167590  | -1.472298 |
| C | 3.345302  | 1.396359  | -2.027616 | C | 4.060745  | -0.757167 | -1.974022 |
| C | 2.092932  | 0.981654  | -2.441052 | C | 2.743545  | 0.614003  | -0.780510 |
| H | 1.502917  | -3.033486 | -1.163716 | C | 4.104266  | 1.068322  | -0.678683 |
| H | 0.662988  | -0.656668 | -2.484142 | C | 4.397929  | 2.116414  | 0.162444  |
| H | 5.766952  | -1.118077 | 1.264067  | C | 3.363176  | 2.772813  | 0.907461  |
| H | 5.896967  | -2.841173 | 0.879499  | C | 2.064278  | 2.392673  | 0.793658  |
| H | 3.497545  | -3.868199 | 0.101155  | H | 1.925055  | -1.077314 | -1.676379 |
| H | 5.124753  | 0.919562  | -0.892927 | H | 1.151343  | 1.931965  | -0.975306 |
| H | 3.727998  | 2.362159  | -2.340229 | H | 6.939175  | 0.178365  | -0.713454 |
| H | 1.487444  | 1.621811  | -3.074637 | H | 6.755324  | -0.572298 | -2.306646 |
| H | 6.474117  | -1.626574 | -0.271407 | H | 4.239617  | -1.619020 | -2.600147 |
| N | 0.457191  | -0.677336 | 1.534374  | H | 5.425334  | 2.447914  | 0.287924  |
| C | -3.333659 | 1.031083  | -0.999722 | H | 3.635246  | 3.588748  | 1.568136  |
| O | -3.515206 | 1.630097  | -2.058927 | H | 1.300348  | 2.931396  | 1.343285  |
| C | -1.992434 | 1.096934  | -0.259325 | H | 6.697293  | 1.190156  | -2.141385 |
| C | 1.807259  | 0.915391  | 2.905820  | N | 0.256657  | -1.647046 | -0.822564 |
| C | -4.038186 | -0.481810 | 0.864416  | C | -3.257592 | 1.263236  | 0.855727  |
| C | -5.127443 | -1.562265 | 0.819308  | O | -3.353866 | 2.366216  | 1.393103  |
| C | -6.287508 | -0.847164 | 0.104583  | C | -1.965406 | 0.440536  | 0.916788  |
| C | -5.596595 | 0.021019  | -0.960840 | C | 1.070996  | -3.166938 | 1.025488  |
| C | -2.609768 | -1.012227 | 0.954397  | C | -4.130186 | -0.641440 | -0.509682 |
| C | -0.781985 | 1.323424  | -1.193798 | C | -5.252719 | -0.596298 | -1.556262 |
| C | 0.326495  | 0.625171  | -0.425850 | C | -6.339607 | 0.238340  | -0.855758 |
| C | -0.279496 | -0.597365 | 0.291387  | C | -5.552727 | 1.308992  | -0.080875 |
| C | 1.153196  | 0.479215  | 1.746535  | C | -2.730289 | -0.856891 | -1.078391 |
| C | 1.117987  | 1.293231  | 0.572653  | C | -0.696574 | 1.287321  | 1.054336  |
| C | 1.722880  | 2.567453  | 0.582827  | C | 0.406003  | 0.437873  | 0.377242  |
| C | 2.355196  | 3.002700  | 1.736577  | C | -0.346400 | -0.311137 | -0.778093 |
| C | 2.399206  | 2.173307  | 2.878585  | C | 0.720655  | -1.931091 | 0.487494  |
| N | -1.679922 | -0.182304 | 0.408211  | C | 0.880510  | -0.743772 | 1.216879  |
| N | -4.263954 | 0.273090  | -0.383489 | C | 1.407970  | -0.776876 | 2.503855  |
| O | -2.310573 | -2.079180 | 1.484118  | C | 1.764632  | -2.012301 | 3.057834  |
| H | 0.171910  | -1.319850 | 2.260588  | C | 1.592613  | -3.190423 | 2.323442  |
| H | -2.045275 | 1.904235  | 0.484451  | N | -1.741598 | -0.293066 | -0.337691 |
| H | 1.830820  | 0.300537  | 3.799432  | N | -4.252686 | 0.662711  | 0.169464  |
| H | -4.196449 | 0.176254  | 1.733695  | O | -2.508360 | -1.500115 | -2.103882 |
| H | -5.387168 | -1.921897 | 1.816952  | H | -0.334473 | -2.338269 | -1.278023 |
| H | -4.771336 | -2.415537 | 0.232579  | H | -2.046197 | -0.265894 | 1.755708  |
| H | -6.830416 | -0.211149 | 0.812316  | H | 0.941533  | -4.083435 | 0.457590  |
| H | -7.003803 | -1.544135 | -0.337192 | H | -4.319547 | -1.455875 | 0.208030  |
| H | -6.111736 | 0.966069  | -1.153748 | H | -5.587558 | -1.596251 | -1.839229 |
| H | -5.484594 | -0.502820 | -1.917222 | H | -4.890930 | -0.091867 | -2.458538 |
| H | -0.582640 | 2.383334  | -1.353907 | H | -6.904904 | -0.389756 | -0.158342 |
| H | -0.985565 | 0.861384  | -2.163017 | H | -7.049968 | 0.680701  | -1.558523 |
| H | -0.231335 | -1.554047 | -0.233335 | H | -6.023143 | 1.595817  | 0.863712  |
| H | 1.682849  | 3.199503  | -0.297894 | H | -5.398133 | 2.220285  | -0.670389 |
| H | 2.820976  | 3.981943  | 1.766712  | H | -0.473009 | 1.509723  | 2.099212  |
| H | 2.901917  | 2.534176  | 3.771489  | H | -0.839783 | 2.237928  | 0.529832  |
|   |           |           |           | H | -0.274273 | 0.160374  | -1.762371 |
|   |           |           |           | H | 1.533813  | 0.136146  | 3.080211  |

Figure 11D Cation C7 Product

H 2.169476 -2.055530 4.064145  
H 1.866728 -4.143663 2.766266

Figure 12B Radical C2 TS

O 2

N 4.285907 0.772804 -0.045631  
C 4.904886 -1.463709 0.939753  
C 1.469529 0.110404 -2.380628  
C 2.550238 0.084548 -1.350602  
C 3.239943 1.226885 -0.829705  
C 4.163016 -0.595537 0.144350  
C 3.086290 -1.050405 -0.677592  
C 2.757418 -2.423324 -0.682793  
C 3.500216 -3.291740 0.108649  
C 4.561557 -2.818625 0.906902  
H 4.837990 1.381602 0.541294  
H 5.720551 -1.105536 1.561000  
H 0.714476 -0.658991 -2.184188  
H 0.975050 1.085893 -2.410189  
H 3.338919 2.175989 -1.335927  
H 1.917062 -2.782318 -1.269093  
H 3.258450 -4.350618 0.119602  
H 5.123970 -3.520648 1.516120  
H 1.875202 -0.083637 -3.384559  
N 1.900103 2.052854 0.488820  
C -3.055961 -0.224053 1.311536  
O -3.636908 0.741877 1.813652  
C -1.672326 -0.696355 1.799011  
C 0.794488 3.733603 -1.021766  
C -2.962811 -2.173453 -0.248316  
C -3.668698 -2.312616 -1.602416  
C -5.092964 -1.814363 -1.296583  
C -4.887071 -0.660721 -0.297782  
C -1.446904 -2.022192 -0.316033  
C -0.847828 0.444949 2.458193  
C -0.001896 1.258278 1.520533  
C 1.367320 1.151193 1.389046  
C 0.807731 2.724924 -0.050634  
C -0.398600 2.294215 0.583206  
C -1.612984 2.910760 0.253512  
C -1.617812 3.910544 -0.722115  
C -0.429857 4.314052 -1.356968  
N -0.915689 -1.334846 0.720086  
N -3.596364 -0.978734 0.333756  
O -0.782020 -2.505692 -1.234822  
H -1.879921 -1.437204 2.587625  
H 1.714280 4.064125 -1.497954  
H -3.179875 -3.053384 0.379399  
H -3.639213 -3.337774 -1.977676  
H -3.175517 -1.668264 -2.337771  
H -5.678547 -2.614449 -0.829816  
H -5.628260 -1.489480 -2.192531  
H -5.676873 -0.594657 0.456434  
H -4.816637 0.314138 -0.794203  
H -0.192695 -0.012638 3.207540

H -1.570835 1.065841 2.996706  
H 2.026677 0.485201 1.935393  
H -2.533542 2.614188 0.747398  
H -2.555362 4.390831 -0.990725  
H -0.463113 5.096279 -2.110883  
H 0.079974 -1.142087 0.672604

Figure 12B Radical C2 Product

O 2

N 3.844035 1.208031 0.392991  
C 5.979825 0.026852 0.966909  
C 2.066650 -1.142762 -1.962229  
C 3.000126 -0.435724 -1.039688  
C 2.768026 0.991404 -0.574977  
C 4.750605 0.158412 0.336072  
C 4.213103 -0.884897 -0.491898  
C 4.940639 -2.091698 -0.628897  
C 6.169757 -2.220855 0.011042  
C 6.688163 -1.174479 0.794231  
H 4.172928 2.153139 0.544434  
H 6.381942 0.827225 1.581875  
H 1.117781 -1.413151 -1.474894  
H 1.803963 -0.516444 -2.826407  
H 2.842330 1.695276 -1.417127  
H 4.548778 -2.899226 -1.241099  
H 6.739514 -3.139437 -0.098750  
H 7.652607 -1.294885 1.279722  
H 2.512054 -2.067489 -2.342193  
N 1.444723 1.226250 0.007224  
C -3.533280 -0.129704 1.363734  
O -3.985056 0.915990 1.839997  
C -2.247140 -0.766567 1.917209  
C 0.510642 3.056465 -1.474559  
C -3.702065 -2.090105 -0.187034  
C -4.305053 -2.080432 -1.596318  
C -5.644268 -1.351322 -1.382075  
C -5.332222 -0.274670 -0.324546  
C -2.190230 -2.251469 -0.120179  
C -1.233719 0.305783 2.411996  
C -0.362705 0.908528 1.344848  
C 0.925800 0.515953 1.074252  
C 0.475985 2.114281 -0.437185  
C -0.676918 1.941487 0.383658  
C -1.807780 2.746514 0.150780  
C -1.771287 3.682244 -0.876068  
C -0.623890 3.833911 -1.681141  
N -1.611115 -1.664085 0.954180  
N -4.142951 -0.800601 0.366916  
O -1.562198 -2.898852 -0.956976  
H -2.562383 -1.338462 2.804027  
H 1.387585 3.186355 -2.101654  
H -4.143306 -2.914172 0.397482  
H -4.419285 -3.088082 -2.001271  
H -3.651645 -1.515131 -2.269430  
H -6.393717 -2.050965 -0.995428



|   |           |           |           |
|---|-----------|-----------|-----------|
| H | -6.040334 | -0.915881 | -2.303065 |
| H | -6.151085 | -0.115730 | 0.383671  |
| H | -5.086018 | 0.694771  | -0.772079 |
| H | -0.592224 | -0.171965 | 3.161121  |
| H | -1.823171 | 1.067385  | 2.930569  |
| H | 1.543313  | -0.213996 | 1.581086  |
| H | -2.695993 | 2.624565  | 0.762416  |
| H | -2.639825 | 4.307915  | -1.064014 |
| H | -0.622314 | 4.572646  | -2.478131 |
| H | -0.598896 | -1.721430 | 0.978165  |

Figure 12B Radical C3 TS

O 2

|   |           |           |           |
|---|-----------|-----------|-----------|
| N | -1.367504 | -2.194245 | -1.417445 |
| C | -0.989037 | -2.879502 | 0.973255  |
| C | -4.437493 | -0.173647 | -1.409041 |
| C | -3.024797 | -0.611376 | -1.096303 |
| C | -2.266328 | -1.386171 | -2.056654 |
| C | -1.600025 | -2.150108 | -0.045200 |
| C | -2.676354 | -1.267717 | 0.194065  |
| C | -3.199069 | -1.167409 | 1.483573  |
| C | -2.610847 | -1.907692 | 2.514168  |
| C | -1.508852 | -2.738778 | 2.262411  |
| H | -0.493810 | -2.539001 | -1.813588 |
| H | -0.157926 | -3.545046 | 0.763001  |
| H | -4.480924 | 0.313878  | -2.387122 |
| H | -2.268920 | -1.295329 | -3.133111 |
| H | -4.053648 | -0.531918 | 1.692058  |
| H | -3.011317 | -1.837459 | 3.521220  |
| H | -1.062355 | -3.298924 | 3.079357  |
| H | -5.108143 | -1.040940 | -1.421154 |
| N | -2.128709 | 1.056529  | -1.067112 |
| C | 2.982124  | 1.195665  | -0.255042 |
| O | 3.150924  | 2.296986  | 0.272868  |
| C | 2.426933  | 1.084905  | -1.682423 |
| C | -2.623481 | 2.069911  | 1.195555  |
| C | 3.209738  | -1.303534 | -0.236116 |
| C | 3.024921  | -2.207772 | 0.987990  |
| C | 3.907436  | -1.516631 | 2.044072  |
| C | 3.737519  | -0.009930 | 1.763954  |
| C | 2.131030  | -1.394779 | -1.302253 |
| C | 1.335834  | 2.160024  | -1.956246 |
| C | 0.001701  | 1.892822  | -1.317166 |
| C | -1.008121 | 1.139953  | -1.869889 |
| C | -1.822735 | 1.775768  | 0.083028  |
| C | -0.504623 | 2.323189  | -0.033321 |
| C | -0.000810 | 3.146953  | 0.986492  |
| C | -0.796395 | 3.410324  | 2.098568  |
| C | -2.097520 | 2.880335  | 2.199075  |
| N | 1.906496  | -0.252401 | -1.982111 |
| N | 3.294394  | 0.036407  | 0.359950  |
| O | 1.553682  | -2.460824 | -1.552065 |
| H | 3.271986  | 1.302780  | -2.353019 |
| H | -3.639157 | 1.695538  | 1.269980  |
| H | 4.163484  | -1.550864 | -0.731696 |

|   |           |           |           |
|---|-----------|-----------|-----------|
| H | 3.317304  | -3.240285 | 0.785432  |
| H | 1.972841  | -2.200978 | 1.291750  |
| H | 4.954342  | -1.809143 | 1.906416  |
| H | 3.621919  | -1.776101 | 3.066655  |
| H | 4.663649  | 0.558148  | 1.895163  |
| H | 2.970837  | 0.453162  | 2.394533  |
| H | 1.215897  | 2.220678  | -3.045393 |
| H | 1.757207  | 3.114781  | -1.630032 |
| H | -1.011410 | 0.662208  | -2.841853 |
| H | 1.000340  | 3.560597  | 0.908708  |
| H | -0.414439 | 4.043563  | 2.895535  |
| H | -2.706362 | 3.115062  | 3.068594  |
| H | 1.190629  | -0.312012 | -2.697214 |
| H | -4.806097 | 0.535473  | -0.662920 |

Figure 12B Radical C3 Product

O 2

|   |           |           |           |
|---|-----------|-----------|-----------|
| N | 4.312527  | 1.164820  | -1.750030 |
| C | 4.542382  | 2.792893  | 0.148514  |
| C | 4.272968  | -1.869107 | -0.314840 |
| C | 3.342897  | -0.665966 | -0.606490 |
| C | 3.715606  | -0.069375 | -1.953026 |
| C | 4.183567  | 1.574510  | -0.430173 |
| C | 3.604522  | 0.531754  | 0.320371  |
| C | 3.382529  | 0.712228  | 1.680089  |
| C | 3.737655  | 1.929878  | 2.279454  |
| C | 4.311985  | 2.953330  | 1.517530  |
| H | 4.609874  | 1.772308  | -2.500012 |
| H | 4.982995  | 3.588816  | -0.445067 |
| H | 4.087569  | -2.668154 | -1.040586 |
| H | 3.992059  | -0.661481 | -2.817333 |
| H | 2.925877  | -0.068848 | 2.279010  |
| H | 3.561862  | 2.078037  | 3.340732  |
| H | 4.581626  | 3.892306  | 1.993452  |
| H | 5.312712  | -1.543372 | -0.413251 |
| N | 1.909026  | -1.103912 | -0.600893 |
| C | -3.580380 | -0.585581 | -0.867267 |
| O | -3.876331 | -1.783690 | -0.851375 |
| C | -2.487219 | -0.012732 | -1.790841 |
| C | 1.621370  | -2.396346 | 1.585685  |
| C | -3.936443 | 1.785607  | -0.173889 |
| C | -4.518354 | 2.297934  | 1.148973  |
| C | -5.732023 | 1.376386  | 1.367507  |
| C | -5.263573 | 0.002504  | 0.855260  |
| C | -2.448482 | 2.055463  | -0.380635 |
| C | -1.441295 | -1.073918 | -2.227519 |
| C | -0.248495 | -1.251616 | -1.328071 |
| C | 1.006845  | -0.761254 | -1.593018 |
| C | 1.214377  | -1.830056 | 0.365258  |
| C | -0.141860 | -1.947265 | -0.071061 |
| C | -1.067940 | -2.663125 | 0.710433  |
| C | -0.650200 | -3.231219 | 1.906279  |
| C | 0.682336  | -3.091263 | 2.340230  |
| N | -1.839889 | 1.149772  | -1.184398 |
| N | -4.217062 | 0.340336  | -0.122523 |

|   |           |           |           |
|---|-----------|-----------|-----------|
| O | -1.874691 | 3.016219  | 0.127380  |
| H | -3.019281 | 0.300436  | -2.704074 |
| H | 2.635330  | -2.304512 | 1.953866  |
| H | -4.477184 | 2.238695  | -1.021203 |
| H | -4.781510 | 3.356652  | 1.098508  |
| H | -3.777790 | 2.171160  | 1.945698  |
| H | -6.581887 | 1.727721  | 0.771497  |
| H | -6.051070 | 1.337284  | 2.412298  |
| H | -6.059219 | -0.578240 | 0.379285  |
| H | -4.830885 | -0.613805 | 1.652177  |
| H | -1.081470 | -0.788848 | -3.222082 |
| H | -1.993269 | -2.011971 | -2.343116 |
| H | 1.353218  | -0.199463 | -2.448999 |
| H | -2.096900 | -2.755239 | 0.376850  |
| H | -1.357434 | -3.784974 | 2.518139  |
| H | 0.989424  | -3.533306 | 3.284327  |
| H | -0.832258 | 1.226309  | -1.275306 |
| H | 4.146923  | -2.276845 | 0.689539  |

Figure 12B Radical C4 TS  
0 2

|   |           |           |           |
|---|-----------|-----------|-----------|
| N | 4.667825  | -2.445472 | 0.666480  |
| C | 2.510785  | -2.607687 | -0.629545 |
| C | 5.838701  | 1.059626  | 0.315739  |
| C | 5.151211  | -0.272539 | 0.286677  |
| C | 5.574211  | -1.438945 | 0.902173  |
| C | 3.640375  | -1.957338 | -0.113353 |
| C | 3.924487  | -0.593911 | -0.367220 |
| C | 2.988180  | 0.192686  | -1.126304 |
| C | 1.916536  | -0.528038 | -1.760699 |
| C | 1.657648  | -1.861398 | -1.464770 |
| H | 4.758690  | -3.397934 | 0.988548  |
| H | 2.310627  | -3.653187 | -0.414748 |
| H | 5.179257  | 1.835282  | 0.723065  |
| H | 6.743096  | 1.025635  | 0.931393  |
| H | 6.459963  | -1.622455 | 1.494680  |
| H | 3.350839  | 1.094784  | -1.606459 |
| H | 1.248796  | 0.017521  | -2.419827 |
| H | 0.776622  | -2.340489 | -1.881092 |
| H | 6.133009  | 1.385504  | -0.690404 |
| N | 2.011978  | 1.289791  | 0.226097  |
| C | -3.297860 | 0.201890  | 1.322863  |
| O | -3.607835 | 1.293846  | 1.806634  |
| C | -2.026045 | -0.561626 | 1.742974  |
| C | 1.241373  | 3.154316  | -1.283442 |
| C | -3.753772 | -1.782222 | -0.121037 |
| C | -4.587890 | -1.830645 | -1.406617 |
| C | -5.836833 | -1.010097 | -1.036187 |
| C | -5.297520 | 0.119500  | -0.139765 |
| C | -2.251249 | -1.965704 | -0.315441 |
| C | -0.931699 | 0.367254  | 2.337892  |
| C | 0.030014  | 0.956845  | 1.346365  |
| C | 1.332070  | 0.540058  | 1.161819  |
| C | 1.073311  | 2.187611  | -0.288031 |
| C | -0.165707 | 2.046320  | 0.404955  |

|   |           |           |           |
|---|-----------|-----------|-----------|
| C | -1.226791 | 2.913528  | 0.112320  |
| C | -1.053609 | 3.874225  | -0.886909 |
| C | 0.163073  | 3.990345  | -1.580817 |
| N | -1.500012 | -1.362346 | 0.635679  |
| N | -4.064230 | -0.450390 | 0.425479  |
| O | -1.787059 | -2.618313 | -1.250351 |
| H | -2.347662 | -1.232525 | 2.555940  |
| H | 2.186663  | 3.258655  | -1.809853 |
| H | -4.096956 | -2.561475 | 0.579417  |
| H | -4.815942 | -2.854686 | -1.709958 |
| H | -4.030143 | -1.353436 | -2.219223 |
| H | -6.541412 | -1.631858 | -0.472312 |
| H | -6.362727 | -0.621792 | -1.912285 |
| H | -5.987886 | 0.406794  | 0.658893  |
| H | -5.052029 | 1.023147  | -0.710022 |
| H | -0.360437 | -0.220160 | 3.064764  |
| H | -1.465976 | 1.142846  | 2.895954  |
| H | 1.847984  | -0.257606 | 1.684792  |
| H | -2.166054 | 2.836112  | 0.651808  |
| H | -1.871703 | 4.548122  | -1.128492 |
| H | 0.270089  | 4.746879  | -2.353846 |
| H | -0.494468 | -1.363339 | 0.491029  |

Figure 12B Radical C4 Product  
0 2

|   |           |           |           |
|---|-----------|-----------|-----------|
| N | -5.664623 | -1.505061 | -1.029016 |
| C | -4.368672 | -2.663947 | 0.790844  |
| C | -4.419887 | 1.980691  | -1.204769 |
| C | -4.727947 | 0.539967  | -0.915334 |
| C | -5.680310 | -0.238864 | -1.561069 |
| C | -4.712176 | -1.572098 | -0.033050 |
| C | -4.112972 | -0.302844 | 0.049099  |
| C | -3.031184 | -0.018188 | 1.054972  |
| C | -2.730438 | -1.231637 | 1.912520  |
| C | -3.356860 | -2.441867 | 1.760379  |
| H | -6.267628 | -2.263727 | -1.311314 |
| H | -4.852887 | -3.629634 | 0.690682  |
| H | -3.409096 | 2.105693  | -1.612315 |
| H | -5.126640 | 2.395317  | -1.930903 |
| H | -6.361902 | 0.021451  | -2.358742 |
| H | -3.345675 | 0.811811  | 1.705652  |
| H | -1.956314 | -1.103708 | 2.664113  |
| H | -3.068601 | -3.267153 | 2.407145  |
| H | -4.474801 | 2.596057  | -0.297900 |
| N | -1.789741 | 0.484416  | 0.412421  |
| C | 3.393620  | 0.344507  | -1.347710 |
| O | 3.465095  | 1.496649  | -1.784438 |
| C | 2.231320  | -0.602238 | -1.704169 |
| C | -1.223812 | 2.477230  | 1.864067  |
| C | 4.332610  | -1.601017 | -0.094206 |
| C | 5.275344  | -1.562910 | 1.114369  |
| C | 6.320372  | -0.511983 | 0.698067  |
| C | 5.511263  | 0.544794  | -0.076421 |
| C | 2.914950  | -2.080519 | 0.201039  |
| C | 0.933324  | 0.153318  | -2.095743 |

|   |           |           |           |
|---|-----------|-----------|-----------|
| C | 0.014689  | 0.537153  | -0.967951 |
| C | -1.152935 | -0.120099 | -0.652716 |
| C | -1.017638 | 1.556089  | 0.826795  |
| C | 0.124026  | 1.627022  | -0.026285 |
| C | 1.056577  | 2.663538  | 0.166518  |
| C | 0.846140  | 3.580391  | 1.189606  |
| C | -0.281156 | 3.485790  | 2.031692  |
| N | 1.978813  | -1.561253 | -0.629573 |
| N | 4.344965  | -0.206656 | -0.567627 |
| O | 2.663851  | -2.878057 | 1.101978  |
| H | 2.565680  | -1.141356 | -2.605725 |
| H | -2.085993 | 2.413384  | 2.521170  |
| H | 4.749977  | -2.261047 | -0.872583 |
| H | 5.706895  | -2.542765 | 1.329361  |
| H | 4.719080  | -1.236283 | 1.999369  |
| H | 7.068926  | -0.966963 | 0.039579  |
| H | 6.847681  | -0.078715 | 1.551943  |
| H | 6.062741  | 0.986029  | -0.912011 |
| H | 5.169527  | 1.363459  | 0.567636  |
| H | 0.378782  | -0.488271 | -2.789357 |
| H | 1.255473  | 1.033307  | -2.661079 |
| H | -1.609187 | -0.973697 | -1.136602 |
| H | 1.930300  | 2.733343  | -0.473805 |
| H | 1.561889  | 4.383038  | 1.347257  |
| H | -0.417801 | 4.212953  | 2.827751  |
| H | 1.012613  | -1.785057 | -0.416345 |

Figure 12B Radical C5 TS

O 2

|   |           |           |           |
|---|-----------|-----------|-----------|
| N | 2.236957  | -2.686931 | -0.632466 |
| C | 1.662316  | -0.537246 | -1.806753 |
| C | 5.349938  | -2.070473 | 1.316957  |
| C | 4.115946  | -2.049460 | 0.466848  |
| C | 3.252491  | -3.087456 | 0.228532  |
| C | 2.410568  | -1.366402 | -0.937084 |
| C | 3.581404  | -0.909011 | -0.254254 |
| C | 3.937526  | 0.431557  | -0.348215 |
| C | 3.039670  | 1.346157  | -1.018425 |
| C | 2.022659  | 0.780644  | -1.898485 |
| H | 1.350145  | -3.163662 | -0.785830 |
| H | 0.843812  | -0.948408 | -2.389519 |
| H | 5.305035  | -1.313997 | 2.111241  |
| H | 5.483653  | -3.047084 | 1.793139  |
| H | 3.277292  | -4.101529 | 0.603968  |
| H | 4.811525  | 0.825544  | 0.162060  |
| H | 3.469106  | 2.294703  | -1.325653 |
| H | 1.481145  | 1.452229  | -2.555576 |
| H | 6.253039  | -1.860268 | 0.728982  |
| N | 1.960608  | 2.109903  | 0.357242  |
| C | -2.974004 | -0.093844 | 1.145800  |
| O | -3.541887 | 0.951474  | 1.467915  |
| C | -1.644284 | -0.545738 | 1.777681  |
| C | 0.930305  | 3.987277  | -0.977513 |
| C | -2.883660 | -2.268070 | -0.080182 |
| C | -3.515865 | -2.602079 | -1.437524 |

|   |           |           |           |
|---|-----------|-----------|-----------|
| C | -4.929010 | -2.004766 | -1.309200 |
| C | -4.724587 | -0.710885 | -0.499341 |
| C | -1.361511 | -2.200277 | -0.072351 |
| C | -0.815116 | 0.622665  | 2.374895  |
| C | 0.046884  | 1.399294  | 1.417846  |
| C | 1.397278  | 1.193408  | 1.220057  |
| C | 0.903479  | 2.914969  | -0.080944 |
| C | -0.301627 | 2.526955  | 0.574555  |
| C | -1.481075 | 3.250658  | 0.341551  |
| C | -1.448412 | 4.318537  | -0.554812 |
| C | -0.257617 | 4.680861  | -1.211021 |
| N | -0.852886 | -1.333306 | 0.826877  |
| N | -3.486179 | -0.967808 | 0.253559  |
| O | -0.680593 | -2.901086 | -0.831779 |
| H | -1.928352 | -1.190209 | 2.625048  |
| H | 1.851388  | 4.277271  | -1.476651 |
| H | -3.183297 | -3.022686 | 0.666032  |
| H | -3.514204 | -3.675363 | -1.638395 |
| H | -2.951180 | -2.106398 | -2.234258 |
| H | -5.578810 | -2.693502 | -0.757736 |
| H | -5.394798 | -1.811538 | -2.278889 |
| H | -5.550542 | -0.493560 | 0.184413  |
| H | -4.582697 | 0.166053  | -1.141459 |
| H | -0.173164 | 0.192527  | 3.152049  |
| H | -1.535604 | 1.273704  | 2.879268  |
| H | 2.026523  | 0.448653  | 1.692590  |
| H | -2.402677 | 2.968679  | 0.841261  |
| H | -2.356996 | 4.883006  | -0.749056 |
| H | -0.260697 | 5.517253  | -1.905227 |
| H | 0.148515  | -1.171179 | 0.800912  |

Figure 12B Radical C5 Product

O 2

|   |           |           |           |
|---|-----------|-----------|-----------|
| N | 5.506655  | -2.301124 | -0.650018 |
| C | 3.545351  | -1.266604 | -1.878345 |
| C | 6.429878  | 0.039847  | 2.085015  |
| C | 5.862558  | -0.717985 | 0.923464  |
| C | 6.285557  | -1.928739 | 0.435252  |
| C | 4.563612  | -1.333758 | -0.884671 |
| C | 4.748456  | -0.308469 | 0.088363  |
| C | 3.925819  | 0.810659  | 0.093502  |
| C | 2.814537  | 0.958433  | -0.916385 |
| C | 2.723145  | -0.186013 | -1.907288 |
| H | 5.622609  | -3.151216 | -1.181692 |
| H | 3.430391  | -2.069815 | -2.602325 |
| H | 5.677161  | 0.207157  | 2.866920  |
| H | 7.266291  | -0.501085 | 2.539509  |
| H | 7.090237  | -2.567059 | 0.773611  |
| H | 4.047396  | 1.608546  | 0.820172  |
| H | 2.960071  | 1.897331  | -1.473934 |
| H | 1.936779  | -0.111247 | -2.653080 |
| H | 6.797690  | 1.029614  | 1.783326  |
| N | 1.503990  | 1.157945  | -0.238449 |
| C | -3.558733 | -0.109837 | 1.391811  |
| O | -3.835493 | 0.941624  | 1.975884  |

|   |           |           |           |
|---|-----------|-----------|-----------|
| C | -2.247248 | -0.875291 | 1.651735  |
| C | 0.595669  | 3.201242  | -1.421947 |
| C | -4.136018 | -1.997886 | -0.139140 |
| C | -5.056816 | -1.949772 | -1.364346 |
| C | -6.273965 | -1.162691 | -0.845196 |
| C | -5.671872 | -0.106857 | 0.100799  |
| C | -2.654085 | -2.185315 | -0.447633 |
| C | -1.104437 | 0.042465  | 2.163789  |
| C | -0.271165 | 0.722511  | 1.112251  |
| C | 0.989247  | 0.321244  | 0.731795  |
| C | 0.558185  | 2.129579  | -0.518074 |
| C | -0.572571 | 1.891435  | 0.319406  |
| C | -1.671223 | 2.768703  | 0.248509  |
| C | -1.628937 | 3.834126  | -0.642792 |
| C | -0.507461 | 4.046295  | -1.471375 |
| N | -1.827909 | -1.628994 | 0.470768  |
| N | -4.394810 | -0.706843 | 0.519015  |
| O | -2.261537 | -2.803357 | -1.435163 |
| H | -2.480053 | -1.575876 | 2.470192  |
| H | 1.452498  | 3.374983  | -2.066152 |
| H | -4.442412 | -2.822146 | 0.526025  |
| H | -5.308627 | -2.948160 | -1.728207 |
| H | -4.555490 | -1.410372 | -2.174982 |
| H | -6.941639 | -1.828766 | -0.287101 |
| H | -6.856379 | -0.706389 | -1.649864 |
| H | -6.300724 | 0.102934  | 0.971260  |
| H | -5.475340 | 0.845076  | -0.406007 |
| H | -0.443711 | -0.573112 | 2.784064  |
| H | -1.578175 | 0.772816  | 2.826931  |
| H | 1.589154  | -0.497945 | 1.106271  |
| H | -2.539446 | 2.602706  | 0.878637  |
| H | -2.473186 | 4.515819  | -0.705582 |
| H | -0.502968 | 4.885061  | -2.162460 |
| H | -0.836276 | -1.655808 | 0.258488  |

Figure 12B Radical C6 TS

0 2

|   |           |           |           |
|---|-----------|-----------|-----------|
| N | 1.628868  | 2.371470  | 0.385167  |
| C | -3.057800 | -0.383152 | 1.292029  |
| O | -3.737536 | 0.514829  | 1.793887  |
| C | -1.622581 | -0.692437 | 1.759793  |
| C | 0.332875  | 3.860637  | -1.181784 |
| C | -2.761023 | -2.328535 | -0.245852 |
| C | -3.469395 | -2.577941 | -1.583383 |
| C | -4.936073 | -2.242684 | -1.256950 |
| C | -4.846998 | -1.048538 | -0.289576 |
| C | -1.277190 | -2.000168 | -0.342929 |
| C | -0.921317 | 0.532525  | 2.415086  |
| C | -0.165289 | 1.417839  | 1.465689  |
| C | 1.205666  | 1.451723  | 1.325502  |
| C | 0.465431  | 2.904003  | -0.169023 |
| C | -0.678346 | 2.370905  | 0.497738  |
| C | -1.957553 | 2.836098  | 0.159862  |
| C | -2.081661 | 3.786109  | -0.854961 |
| C | -0.950282 | 4.288995  | -1.522441 |

|   |           |           |           |
|---|-----------|-----------|-----------|
| N | -0.813341 | -1.233708 | 0.663127  |
| N | -3.519814 | -1.205633 | 0.327785  |
| O | -0.579786 | -2.430606 | -1.271574 |
| H | -1.728718 | -1.460371 | 2.541819  |
| H | 1.205318  | 4.268784  | -1.685649 |
| H | -2.859558 | -3.216158 | 0.400716  |
| H | -3.326397 | -3.600416 | -1.939099 |
| H | -3.069333 | -1.895647 | -2.340699 |
| H | -5.413539 | -3.093734 | -0.758530 |
| H | -5.523112 | -2.005611 | -2.147886 |
| H | -5.627882 | -1.051486 | 0.476472  |
| H | -4.892440 | -0.084966 | -0.810284 |
| H | -0.223341 | 0.150971  | 3.168011  |
| H | -1.706800 | 1.077960  | 2.947712  |
| H | 1.941598  | 0.872288  | 1.872365  |
| H | -2.834709 | 2.460448  | 0.678417  |
| H | -3.068542 | 4.149615  | -1.130270 |
| H | -1.075982 | 5.029132  | -2.308464 |
| H | 0.141219  | -0.893382 | 0.590969  |
| N | 2.283452  | -2.063674 | -1.021218 |
| C | 2.276500  | 0.423216  | -1.356496 |
| C | 5.321341  | -2.829177 | 0.988720  |
| C | 4.184181  | -2.233125 | 0.212777  |
| C | 3.120222  | -2.922849 | -0.355244 |
| C | 2.766582  | -0.773905 | -0.864981 |
| C | 3.968233  | -0.860003 | -0.091867 |
| C | 4.673715  | 0.341163  | 0.210390  |
| C | 4.167951  | 1.544587  | -0.201453 |
| C | 2.904802  | 1.638663  | -0.916648 |
| H | 1.322837  | -2.282504 | -1.301820 |
| H | 1.389518  | 0.466976  | -1.980630 |
| H | 5.196008  | -3.910690 | 1.101922  |
| H | 6.285879  | -2.656927 | 0.493982  |
| H | 2.906609  | -3.983242 | -0.326546 |
| H | 5.612699  | 0.297331  | 0.756450  |
| H | 4.690834  | 2.468077  | 0.027645  |
| H | 2.774659  | 2.511858  | -1.546851 |
| H | 5.395658  | -2.394980 | 1.993737  |

Figure 12B Radical C6 Product

0 2

|   |           |           |           |
|---|-----------|-----------|-----------|
| N | 1.436848  | 1.622912  | 0.112574  |
| C | -3.604476 | -0.172117 | 1.222682  |
| O | -4.097955 | 0.886551  | 1.621131  |
| C | -2.255581 | -0.702578 | 1.745995  |
| C | 0.459894  | 3.367009  | -1.436960 |
| C | -3.697515 | -2.288584 | -0.099461 |
| C | -4.442957 | -2.532692 | -1.416833 |
| C | -5.814839 | -1.883871 | -1.157035 |
| C | -5.492909 | -0.637326 | -0.312355 |
| C | -2.175687 | -2.273281 | -0.205508 |
| C | -1.331034 | 0.422865  | 2.284649  |
| C | -0.445533 | 1.096732  | 1.272594  |
| C | 0.895642  | 0.834058  | 1.108268  |
| C | 0.426845  | 2.412550  | -0.410078 |

|   |           |           |           |
|---|-----------|-----------|-----------|
| C | -0.772964 | 2.115816  | 0.302999  |
| C | -1.950070 | 2.817288  | -0.019682 |
| C | -1.913237 | 3.768918  | -1.031877 |
| C | -0.720741 | 4.038381  | -1.735338 |
| N | -1.571193 | -1.505695 | 0.733230  |
| N | -4.219617 | -0.983465 | 0.338954  |
| O | -1.567735 | -2.916477 | -1.058735 |
| H | -2.511187 | -1.340614 | 2.607608  |
| H | 1.371383  | 3.582601  | -1.986652 |
| H | -3.971852 | -3.064270 | 0.634448  |
| H | -4.504921 | -3.594936 | -1.662792 |
| H | -3.915578 | -2.026417 | -2.232287 |
| H | -6.451545 | -2.568739 | -0.585669 |
| H | -6.343498 | -1.628614 | -2.079131 |
| H | -6.257677 | -0.411617 | 0.436791  |
| H | -5.353255 | 0.259258  | -0.927638 |
| H | -0.695921 | -0.019308 | 3.060005  |
| H | -1.988623 | 1.143410  | 2.780611  |
| H | 1.532551  | 0.152188  | 1.656451  |
| H | -2.872099 | 2.603165  | 0.511838  |
| H | -2.817433 | 4.314260  | -1.289613 |
| H | -0.722161 | 4.784083  | -2.525947 |
| H | -0.568118 | -1.385495 | 0.639808  |
| N | 4.218573  | -1.871805 | -1.583379 |
| C | 2.976331  | 0.276843  | -1.272523 |
| C | 6.743454  | -2.045623 | 1.138391  |
| C | 5.649742  | -1.716506 | 0.164408  |
| C | 5.249077  | -2.495512 | -0.912561 |
| C | 3.921427  | -0.670948 | -0.956805 |
| C | 4.822370  | -0.561871 | 0.153096  |
| C | 4.734396  | 0.597223  | 0.994207  |
| C | 3.815143  | 1.562243  | 0.747877  |
| C | 2.828369  | 1.500281  | -0.399410 |
| H | 3.747171  | -2.238856 | -2.396416 |
| H | 2.305881  | 0.170741  | -2.120004 |
| H | 6.366437  | -2.104350 | 2.167401  |
| H | 7.206416  | -3.008473 | 0.899794  |
| H | 5.628546  | -3.450553 | -1.248835 |
| H | 5.416107  | 0.701721  | 1.835383  |
| H | 3.746935  | 2.440518  | 1.384119  |
| H | 2.959564  | 2.405961  | -1.011627 |
| H | 7.535235  | -1.285673 | 1.131104  |

Figure 12B Radical C7 TS

0 2

|   |           |           |           |
|---|-----------|-----------|-----------|
| N | -2.628234 | -0.497297 | 1.886417  |
| C | -3.844699 | 0.303962  | -0.181696 |
| C | -1.497132 | -3.974606 | 1.227141  |
| C | -2.069454 | -2.589328 | 1.243453  |
| C | -1.976295 | -1.662915 | 2.253534  |
| C | -3.143138 | -0.642738 | 0.628298  |
| C | -2.815957 | -1.949175 | 0.186024  |
| C | -3.275365 | -2.379946 | -1.071805 |
| C | -4.066239 | -1.507232 | -1.845761 |
| C | -4.383104 | -0.230805 | -1.405833 |

|   |           |           |           |
|---|-----------|-----------|-----------|
| H | -2.617827 | 0.364504  | 2.414395  |
| H | -4.382883 | 1.112494  | 0.299795  |
| H | -0.659403 | -4.040840 | 0.523207  |
| H | -1.121136 | -4.254568 | 2.216604  |
| H | -1.502167 | -1.740486 | 3.222042  |
| H | -3.048219 | -3.378542 | -1.433994 |
| H | -4.457837 | -1.853008 | -2.798484 |
| H | -5.008589 | 0.416078  | -2.013023 |
| H | -2.246966 | -4.718987 | 0.931414  |
| N | -2.461876 | 1.623527  | -0.803679 |
| C | 3.084488  | 0.894715  | -0.916491 |
| O | 3.347774  | 2.098162  | -0.850916 |
| C | 1.999625  | 0.323760  | -1.850563 |
| C | -2.217282 | 2.895311  | 1.356540  |
| C | 3.508165  | -1.494246 | -0.344652 |
| C | 4.132065  | -2.061124 | 0.936776  |
| C | 5.323878  | -1.118183 | 1.182846  |
| C | 4.807108  | 0.267435  | 0.755765  |
| C | 2.023053  | -1.795283 | -0.534278 |
| C | 0.950620  | 1.375452  | -2.292540 |
| C | -0.244749 | 1.572437  | -1.401017 |
| C | -1.527179 | 1.155518  | -1.699769 |
| C | -1.744752 | 2.276043  | 0.192721  |
| C | -0.358873 | 2.307834  | -0.153470 |
| C | 0.540471  | 3.006610  | 0.663752  |
| C | 0.064016  | 3.612645  | 1.828252  |
| C | -1.297171 | 3.553547  | 2.175311  |
| N | 1.367041  | -0.852556 | -1.251847 |
| N | 3.753313  | -0.047396 | -0.221174 |
| O | 1.499291  | -2.810137 | -0.077969 |
| H | 2.538657  | 0.019676  | -2.762982 |
| H | -3.274923 | 2.884547  | 1.609841  |
| H | 4.041094  | -1.887636 | -1.226202 |
| H | 4.423352  | -3.107441 | 0.823008  |
| H | 3.405132  | -1.999420 | 1.753508  |
| H | 6.170831  | -1.412135 | 0.552616  |
| H | 5.662838  | -1.127101 | 2.222048  |
| H | 5.576956  | 0.896452  | 0.299105  |
| H | 4.372567  | 0.826083  | 1.593241  |
| H | 0.589209  | 1.076258  | -3.282398 |
| H | 1.503684  | 2.311553  | -2.423163 |
| H | -1.851245 | 0.582232  | -2.561182 |
| H | 1.590288  | 3.070812  | 0.393925  |
| H | 0.755801  | 4.147051  | 2.474397  |
| H | -1.641530 | 4.038742  | 3.084861  |
| H | 0.361500  | -0.952577 | -1.344759 |

Figure 12B Radical C7 Product

0 2

|   |           |           |           |
|---|-----------|-----------|-----------|
| N | -2.852943 | -0.675510 | 1.620853  |
| C | -3.219138 | 1.210708  | -0.070840 |
| C | -4.910853 | -3.600901 | 0.644288  |
| C | -4.185744 | -2.298677 | 0.815185  |
| C | -3.298911 | -1.972362 | 1.814342  |
| C | -3.433299 | -0.159537 | 0.497792  |

|   |           |           |           |
|---|-----------|-----------|-----------|
| C | -4.278641 | -1.137875 | -0.038404 |
| C | -5.019761 | -0.864899 | -1.222400 |
| C | -4.868436 | 0.403072  | -1.830887 |
| C | -4.042682 | 1.380836  | -1.327382 |
| H | -2.163471 | -0.208317 | 2.192710  |
| H | -3.524420 | 1.979235  | 0.657362  |
| H | -4.678300 | -4.072443 | -0.319379 |
| H | -4.637501 | -4.309005 | 1.433370  |
| H | -2.942706 | -2.557190 | 2.650663  |
| H | -5.679523 | -1.609766 | -1.655532 |
| H | -5.430641 | 0.617392  | -2.736967 |
| H | -3.957455 | 2.343463  | -1.823140 |
| H | -6.000275 | -3.469381 | 0.679706  |
| N | -1.786180 | 1.504046  | -0.321203 |
| C | 3.524201  | 0.336283  | -1.055599 |
| O | 3.949637  | 1.491988  | -1.138358 |
| C | 2.304591  | -0.153416 | -1.860631 |
| C | -1.177034 | 2.840207  | 1.739334  |
| C | 3.676003  | -2.016308 | -0.231743 |
| C | 4.281470  | -2.502391 | 1.090403  |
| C | 5.602406  | -1.715662 | 1.169875  |
| C | 5.259779  | -0.334894 | 0.580443  |
| C | 2.158813  | -2.137288 | -0.336187 |
| C | 1.343586  | 0.997734  | -2.260946 |
| C | 0.276911  | 1.356260  | -1.262260 |
| C | -1.049148 | 1.008750  | -1.379670 |
| C | -0.923864 | 2.176390  | 0.529853  |
| C | 0.383930  | 2.113655  | -0.036532 |
| C | 1.445236  | 2.756457  | 0.628005  |
| C | 1.191937  | 3.419766  | 1.823026  |
| C | -0.104942 | 3.458178  | 2.374747  |
| N | 1.591697  | -1.213855 | -1.149741 |
| N | 4.112529  | -0.611541 | -0.298999 |
| O | 1.525565  | -3.008363 | 0.256209  |
| H | 2.721722  | -0.556356 | -2.797982 |
| H | -2.172696 | 2.882196  | 2.171467  |
| H | 4.111639  | -2.581208 | -1.072375 |
| H | 4.419972  | -3.585515 | 1.104761  |
| H | 3.613727  | -2.235370 | 1.916358  |
| H | 6.368017  | -2.204715 | 0.557073  |
| H | 5.989493  | -1.640944 | 2.189401  |
| H | 6.081441  | 0.109138  | 0.010585  |
| H | 4.960381  | 0.385355  | 1.350822  |
| H | 0.854010  | 0.706083  | -3.196415 |
| H | 1.980598  | 1.858465  | -2.487008 |
| H | -1.546984 | 0.459104  | -2.167598 |
| H | 2.446722  | 2.722601  | 0.210710  |
| H | 2.006028  | 3.917027  | 2.343788  |
| H | -0.273527 | 3.981446  | 3.312112  |
| H | 0.577978  | -1.206794 | -1.186534 |

Compound **SI-6**

0 1

|   |           |           |           |
|---|-----------|-----------|-----------|
| N | -3.411545 | 1.506824  | -0.600124 |
| C | 1.358177  | -0.248240 | 1.359732  |

|   |           |           |           |
|---|-----------|-----------|-----------|
| O | 0.933925  | -1.082974 | 2.164039  |
| C | 0.823028  | 1.195582  | 1.318693  |
| C | -3.998417 | -0.847060 | -1.280641 |
| C | 2.945599  | 0.480348  | -0.427680 |
| C | 3.579456  | -0.396553 | -1.514122 |
| C | 4.050463  | -1.629507 | -0.721584 |
| C | 2.956197  | -1.842449 | 0.341574  |
| C | 1.912163  | 1.485608  | -0.923507 |
| C | -0.632012 | 1.312448  | 1.846299  |
| C | -1.729816 | 1.067741  | 0.847147  |
| C | -2.486681 | 2.057690  | 0.261036  |
| C | -3.279619 | 0.134434  | -0.587631 |
| C | -2.224383 | -0.183751 | 0.315383  |
| C | -1.900592 | -1.538844 | 0.522785  |
| C | -2.614339 | -2.515452 | -0.161952 |
| C | -3.651366 | -2.174342 | -1.056257 |
| N | 0.944798  | 1.772342  | -0.019162 |
| N | 2.352438  | -0.507877 | 0.487718  |
| O | 1.976136  | 1.996010  | -2.039887 |
| H | -4.090602 | 2.027075  | -1.135132 |
| H | 1.458503  | 1.758574  | 2.021697  |
| H | -4.798876 | -0.579752 | -1.965306 |
| H | 3.731268  | 1.048551  | 0.097580  |
| H | 4.387958  | 0.117843  | -2.037783 |
| H | 2.817025  | -0.669696 | -2.251358 |
| H | 5.009386  | -1.418559 | -0.234994 |
| H | 4.184679  | -2.511838 | -1.352667 |
| H | 3.348472  | -2.193769 | 1.300695  |
| H | 2.187887  | -2.552612 | 0.014878  |
| H | -0.752821 | 2.323525  | 2.250832  |
| H | -0.703840 | 0.619364  | 2.690162  |
| H | -2.448788 | 3.128955  | 0.409946  |
| H | -1.099900 | -1.808675 | 1.204075  |
| H | -2.371032 | -3.563439 | -0.007429 |
| H | -4.189824 | -2.961729 | -1.576910 |
| H | 0.203031  | 2.386955  | -0.336186 |

Compound **SI-PC-I**

0 4

|    |           |           |           |
|----|-----------|-----------|-----------|
| H  | 0.156796  | 0.114742  | 0.205381  |
| Fe | -2.998491 | -0.235894 | 0.008038  |
| N  | -3.474594 | -2.190562 | 0.184175  |
| N  | -2.222544 | -0.595080 | -1.817988 |
| N  | -4.078481 | 0.149371  | 1.666905  |
| N  | -2.792431 | 1.742806  | -0.306468 |
| C  | -4.067139 | -2.802783 | 1.259344  |
| C  | -1.642011 | 0.318113  | -2.660525 |
| C  | -3.139187 | -3.201730 | -0.686097 |
| C  | -2.059578 | -1.817107 | -2.418291 |
| C  | -4.604047 | -0.776450 | 2.547968  |
| C  | -2.123730 | 2.346625  | -1.347260 |
| C  | -4.288463 | 1.381361  | 2.249504  |
| C  | -3.150039 | 2.755235  | 0.545957  |
| C  | -4.110441 | -4.231010 | 1.063532  |
| C  | -1.101164 | -0.342825 | -3.821983 |

|   |           |           |           |
|---|-----------|-----------|-----------|
| C | -3.540646 | -4.478082 | -0.148008 |
| C | -1.363745 | -1.671439 | -3.672769 |
| C | -5.177734 | -0.106419 | 3.687593  |
| C | -2.067299 | 3.773025  | -1.143658 |
| C | -4.988367 | 1.228283  | 3.500794  |
| C | -2.705897 | 4.027305  | 0.031916  |
| H | -4.533443 | -4.935121 | 1.768217  |
| H | -0.594507 | 0.159842  | -4.635577 |
| H | -3.395086 | -5.427904 | -0.645993 |
| H | -1.118095 | -2.488763 | -4.338308 |
| H | -5.659137 | -0.610381 | 4.515632  |
| H | -1.597885 | 4.472442  | -1.823081 |
| H | -5.278933 | 2.048319  | 4.144559  |
| H | -2.871894 | 4.979182  | 0.519431  |
| C | -4.582733 | -2.148845 | 2.372985  |
| C | -1.589188 | 1.690709  | -2.445518 |
| C | -3.859081 | 2.594125  | 1.732910  |
| C | -2.494582 | -3.033127 | -1.902144 |
| H | -5.023357 | -2.760310 | 3.153665  |
| H | -1.091841 | 2.295557  | -3.196783 |
| H | -4.081166 | 3.488188  | 2.306612  |
| H | -2.298181 | -3.923565 | -2.490749 |
| O | -1.566668 | -0.383353 | 0.779155  |
| S | -5.413147 | -0.140365 | -0.931136 |
| C | -5.971245 | 1.587188  | -1.026737 |
| H | -5.310977 | 2.184750  | -1.659531 |
| H | -6.991641 | 1.605509  | -1.420412 |
| H | -5.983127 | 2.024731  | -0.021115 |
| N | 1.107021  | 0.348551  | -0.089892 |
| C | 6.505686  | 0.008094  | -0.840995 |
| O | 6.664471  | 1.055633  | -1.474254 |
| C | 5.418407  | -1.021853 | -1.204157 |
| C | 1.388096  | 2.609570  | 0.981445  |
| C | 7.184461  | -1.631286 | 0.916681  |
| C | 7.899187  | -1.336052 | 2.240820  |
| C | 9.012132  | -0.359621 | 1.818290  |
| C | 8.364261  | 0.505702  | 0.721335  |
| C | 5.729757  | -2.072420 | 1.049228  |
| C | 4.220685  | -0.395834 | -1.968472 |
| C | 3.115686  | 0.181156  | -1.126609 |
| C | 1.903657  | -0.435347 | -0.891361 |
| C | 1.786667  | 1.507429  | 0.212969  |
| C | 3.062705  | 1.442261  | -0.421689 |
| C | 3.948204  | 2.528370  | -0.274418 |
| C | 3.552314  | 3.623163  | 0.485807  |
| C | 2.285872  | 3.663617  | 1.109403  |
| N | 4.963669  | -1.752639 | -0.022020 |
| N | 7.297742  | -0.356639 | 0.187986  |
| O | 5.311604  | -2.674635 | 2.035919  |
| H | 5.906537  | -1.721997 | -1.901921 |
| H | 0.411769  | 2.636213  | 1.457757  |
| H | 7.723262  | -2.421849 | 0.368520  |
| H | 8.276376  | -2.244489 | 2.715388  |
| H | 7.198043  | -0.858220 | 2.933183  |
| H | 9.861767  | -0.914705 | 1.404683  |

|   |          |           |           |
|---|----------|-----------|-----------|
| H | 9.382792 | 0.244539  | 2.650529  |
| H | 9.060415 | 0.790638  | -0.073253 |
| H | 7.921044 | 1.424830  | 1.122308  |
| H | 3.796240 | -1.179573 | -2.606032 |
| H | 4.649350 | 0.361091  | -2.632839 |
| H | 1.536536 | -1.383130 | -1.264351 |
| H | 4.926492 | 2.500548  | -0.744185 |
| H | 4.229274 | 4.465391  | 0.605162  |
| H | 2.007562 | 4.533431  | 1.698896  |
| H | 3.969441 | -1.937277 | 0.061203  |

TS from **SI-PC-I** to **SI-R-I**

0 4

|    |          |           |           |
|----|----------|-----------|-----------|
| H  | 0.212881 | -0.095237 | 0.260839  |
| Fe | 2.755812 | 0.248505  | -0.018954 |
| N  | 3.073813 | 2.234834  | 0.209025  |
| N  | 1.894495 | 0.612618  | -1.814512 |
| N  | 3.745924 | -0.115029 | 1.701589  |
| N  | 2.591814 | -1.733687 | -0.333383 |
| C  | 3.705567 | 2.843470  | 1.261672  |
| C  | 1.440768 | -0.323620 | -2.707577 |
| C  | 2.632885 | 3.241688  | -0.610806 |
| C  | 1.613894 | 1.837898  | -2.362039 |
| C  | 4.277824 | 0.820746  | 2.552374  |
| C  | 2.036436 | -2.347116 | -1.426516 |
| C  | 3.930599 | -1.332468 | 2.303013  |
| C  | 2.932328 | -2.736413 | 0.541210  |
| C  | 3.673873 | 4.278390  | 1.096538  |
| C  | 0.852443 | 0.329265  | -3.852857 |
| C  | 3.004603 | 4.525599  | -0.062788 |
| C  | 0.954884 | 1.671067  | -3.635923 |
| C  | 4.827519 | 0.171359  | 3.719975  |
| C  | 2.039686 | -3.779304 | -1.245453 |
| C  | 4.607783 | -1.163546 | 3.567994  |
| C  | 2.588500 | -4.020393 | -0.022055 |
| H  | 4.107686 | 4.986413  | 1.791029  |
| H  | 0.423745 | -0.187245 | -4.702229 |
| H  | 2.776470 | 5.478977  | -0.522069 |
| H  | 0.632488 | 2.485499  | -4.272199 |
| H  | 5.309591 | 0.688136  | 4.540018  |
| H  | 1.661069 | -4.490757 | -1.968216 |
| H  | 4.874204 | -1.973242 | 4.235320  |
| H  | 2.758950 | -4.971185 | 0.466712  |
| C  | 4.273953 | 2.194235  | 2.350870  |
| C  | 1.509632 | -1.700771 | -2.539342 |
| C  | 3.542441 | -2.559050 | 1.776030  |
| C  | 1.942814 | 3.067812  | -1.803464 |
| H  | 4.735618 | 2.811822  | 3.114675  |
| H  | 1.103629 | -2.322119 | -3.331271 |
| H  | 3.754107 | -3.447071 | 2.362995  |
| H  | 1.659466 | 3.959674  | -2.353184 |
| O  | 1.258203 | 0.321697  | 0.786757  |
| S  | 4.875395 | 0.265719  | -1.175643 |
| C  | 5.781432 | -1.282407 | -0.802588 |
| H  | 5.235575 | -2.161776 | -1.154976 |

|   |           |           |           |
|---|-----------|-----------|-----------|
| H | 6.745971  | -1.236476 | -1.318420 |
| H | 5.964774  | -1.386762 | 0.270695  |
| N | -0.886881 | -0.475613 | -0.161706 |
| C | -6.100032 | -0.177158 | -0.646909 |
| O | -6.314447 | -1.326261 | -1.044886 |
| C | -5.164180 | 0.766650  | -1.422137 |
| C | -1.090980 | -2.681852 | 1.016169  |
| C | -6.543099 | 1.722981  | 0.922303  |
| C | -6.786999 | 1.597455  | 2.431666  |
| C | -7.867430 | 0.501842  | 2.500588  |
| C | -7.502421 | -0.476694 | 1.365110  |
| C | -5.227610 | 2.370521  | 0.520930  |
| C | -4.015764 | -0.019858 | -2.110630 |
| C | -2.917520 | -0.496881 | -1.209869 |
| C | -1.692665 | 0.198096  | -0.975773 |
| C | -1.540376 | -1.663124 | 0.195092  |
| C | -2.812636 | -1.706251 | -0.446575 |
| C | -3.644998 | -2.822720 | -0.252236 |
| C | -3.193245 | -3.858540 | 0.575941  |
| C | -1.942584 | -3.791203 | 1.199523  |
| N | -4.631103 | 1.831615  | -0.575473 |
| N | -6.673486 | 0.336052  | 0.456742  |
| O | -4.769363 | 3.330673  | 1.132889  |
| H | -5.771496 | 1.197180  | -2.233894 |
| H | -0.119183 | -2.633828 | 1.497020  |
| H | -7.342078 | 2.337331  | 0.475455  |
| H | -7.098529 | 2.544054  | 2.877360  |
| H | -5.864761 | 1.272752  | 2.925922  |
| H | -8.854930 | 0.938959  | 2.315968  |
| H | -7.900919 | 0.003236  | 3.472560  |
| H | -8.377817 | -0.870731 | 0.839929  |
| H | -6.911801 | -1.329618 | 1.716414  |
| H | -3.585814 | 0.632455  | -2.879681 |
| H | -4.486989 | -0.864366 | -2.620719 |
| H | -1.384139 | 1.145522  | -1.401398 |
| H | -4.623661 | -2.864105 | -0.717478 |
| H | -3.825404 | -4.726403 | 0.737604  |
| H | -1.616231 | -4.606958 | 1.837732  |
| H | -3.811043 | 2.330622  | -0.902223 |

Compound **SI-R-I**

0 2

|   |           |           |           |
|---|-----------|-----------|-----------|
| N | -3.049957 | 1.767668  | -0.938990 |
| C | 1.226975  | -0.379821 | 1.350606  |
| O | 0.668817  | -1.205515 | 2.078688  |
| C | 0.891815  | 1.119025  | 1.446887  |
| C | -3.937156 | -0.528659 | -1.404071 |
| C | 2.951727  | 0.232762  | -0.356465 |
| C | 3.358945  | -0.614142 | -1.568735 |
| C | 3.598159  | -1.999161 | -0.939197 |
| C | 2.528685  | -2.114275 | 0.165686  |
| C | 2.191476  | 1.510604  | -0.674993 |
| C | -0.590898 | 1.344209  | 1.848498  |
| C | -1.600186 | 1.142981  | 0.761433  |
| C | -2.163567 | 2.189106  | -0.058441 |

|   |           |           |           |
|---|-----------|-----------|-----------|
| C | -3.128193 | 0.370188  | -0.735631 |
| C | -2.247992 | -0.055782 | 0.304737  |
| C | -2.194798 | -1.406082 | 0.671805  |
| C | -3.019767 | -2.316515 | -0.008681 |
| C | -3.873622 | -1.888708 | -1.027255 |
| N | 1.213738  | 1.831963  | 0.211707  |
| N | 2.173231  | -0.713534 | 0.453780  |
| O | 2.474247  | 2.204186  | -1.647704 |
| H | 1.499014  | 1.511817  | 2.277799  |
| H | -4.604721 | -0.196304 | -2.193602 |
| H | 3.855768  | 0.535333  | 0.197462  |
| H | 4.236716  | -0.209331 | -2.076008 |
| H | 2.532376  | -0.644972 | -2.286978 |
| H | 4.599817  | -2.040306 | -0.497273 |
| H | 3.522188  | -2.811683 | -1.666205 |
| H | 2.895304  | -2.612983 | 1.068029  |
| H | 1.631644  | -2.646631 | -0.168840 |
| H | -0.676916 | 2.370569  | 2.224488  |
| H | -0.783836 | 0.667611  | 2.685956  |
| H | -1.913981 | 3.244200  | 0.022986  |
| H | -1.518446 | -1.741265 | 1.451010  |
| H | -2.991264 | -3.368044 | 0.261809  |
| H | -4.502380 | -2.611211 | -1.539980 |
| H | 0.765510  | 2.726764  | 0.048899  |

Compound **SI-PC-II**

0 4

|   |          |           |           |
|---|----------|-----------|-----------|
| N | 2.776823 | -2.902193 | -1.761432 |
| C | 3.906859 | 0.961732  | 1.432361  |
| O | 4.633907 | 0.451003  | 2.290953  |
| C | 2.443526 | 0.527270  | 1.299373  |
| C | 5.195672 | -3.602081 | -1.883743 |
| C | 3.532782 | 2.648665  | -0.386444 |
| C | 4.526529 | 2.916383  | -1.524176 |
| C | 5.834046 | 3.192586  | -0.755828 |
| C | 5.774178 | 2.258427  | 0.473776  |
| C | 2.245204 | 1.943000  | -0.779774 |
| C | 2.316617 | -1.020417 | 1.402508  |
| C | 2.805609 | -1.800963 | 0.212847  |
| C | 2.021531 | -2.199354 | -0.846039 |
| C | 4.077690 | -2.982504 | -1.311833 |
| C | 4.137548 | -2.293111 | -0.064876 |
| C | 5.370878 | -2.238965 | 0.614233  |
| C | 6.482798 | -2.854236 | 0.049027  |
| C | 6.397844 | -3.529210 | -1.187804 |
| N | 1.792775 | 1.009941  | 0.085140  |
| N | 4.348365 | 1.907141  | 0.579551  |
| O | 1.646077 | 2.272368  | -1.806272 |
| H | 2.425542 | -3.302117 | -2.618368 |
| H | 1.925285 | 0.942518  | 2.177500  |
| H | 5.124965 | -4.121352 | -2.836012 |
| H | 3.229981 | 3.612421  | 0.056255  |
| H | 4.212553 | 3.746071  | -2.160699 |
| H | 4.618321 | 2.019623  | -2.147218 |
| H | 5.861786 | 4.238930  | -0.431940 |



|    |           |           |           |
|----|-----------|-----------|-----------|
| H  | 6.725581  | 3.010340  | -1.361579 |
| H  | 6.128291  | 2.741223  | 1.390665  |
| H  | 6.353131  | 1.338900  | 0.338467  |
| H  | 1.254746  | -1.238712 | 1.563192  |
| H  | 2.848360  | -1.315989 | 2.311714  |
| H  | 0.967240  | -2.023808 | -1.015201 |
| H  | 5.449920  | -1.702904 | 1.554511  |
| H  | 7.437795  | -2.814383 | 0.566853  |
| H  | 7.285134  | -3.999134 | -1.603943 |
| H  | 0.893260  | 0.580749  | -0.150261 |
| Fe | -2.316764 | 0.077543  | 0.009827  |
| N  | -2.689465 | 1.022754  | -1.732504 |
| N  | -1.744423 | 1.827448  | 0.831512  |
| N  | -3.213099 | -1.571878 | -0.723594 |
| N  | -2.236046 | -0.786790 | 1.828617  |
| C  | -3.116733 | 0.453929  | -2.905415 |
| C  | -1.285613 | 2.026355  | 2.108761  |
| C  | -2.435659 | 2.342599  | -2.025949 |
| C  | -1.620169 | 3.034990  | 0.195490  |
| C  | -3.582502 | -1.799716 | -2.035568 |
| C  | -1.704154 | -0.242602 | 2.975609  |
| C  | -3.418860 | -2.765692 | -0.064402 |
| C  | -2.547789 | -2.084806 | 2.140564  |
| C  | -3.133248 | 1.434561  | -3.963028 |
| C  | -0.861552 | 3.393505  | 2.282887  |
| C  | -2.719416 | 2.609584  | -3.414474 |
| C  | -1.075151 | 4.022519  | 1.093386  |
| C  | -4.052641 | -3.152965 | -2.190654 |
| C  | -1.690522 | -1.222359 | 4.033637  |
| C  | -3.959153 | -3.748506 | -0.970313 |
| C  | -2.217254 | -2.366436 | 3.515590  |
| H  | -3.435425 | 1.233167  | -4.982519 |
| H  | -0.463360 | 3.801911  | 3.202695  |
| H  | -2.605304 | 3.575148  | -3.889672 |
| H  | -0.886075 | 5.055037  | 0.830045  |
| H  | -4.406409 | -3.574957 | -3.122386 |
| H  | -1.326074 | -1.039019 | 5.036092  |
| H  | -4.216552 | -4.762302 | -0.692168 |
| H  | -2.375327 | -3.319809 | 4.002873  |
| C  | -3.516448 | -0.869075 | -3.057692 |
| C  | -1.257470 | 1.063569  | 3.111655  |
| C  | -3.114664 | -3.007715 | 1.266338  |
| C  | -1.956645 | 3.285979  | -1.130506 |
| H  | -3.830526 | -1.186843 | -4.046581 |
| H  | -0.867796 | 1.360747  | 4.080029  |
| H  | -3.316904 | -4.001750 | 1.652079  |
| H  | -1.804748 | 4.294558  | -1.500779 |
| O  | -0.800301 | -0.368618 | -0.400787 |
| S  | -4.825981 | 0.623891  | 0.373337  |
| C  | -5.470722 | -0.325365 | 1.783660  |
| H  | -4.904321 | -0.121263 | 2.695363  |
| H  | -6.524270 | -0.067819 | 1.926835  |
| H  | -5.406894 | -1.398018 | 1.563975  |

|    |           |           |           |
|----|-----------|-----------|-----------|
| O  | 4         |           |           |
| N  | 2.868669  | -2.928062 | -1.953318 |
| C  | 3.621599  | 1.017824  | 1.222748  |
| O  | 4.489894  | 0.498841  | 1.931676  |
| C  | 2.210243  | 0.409313  | 1.085576  |
| C  | 5.306654  | -3.571247 | -1.997780 |
| C  | 2.819526  | 2.845064  | -0.271095 |
| C  | 3.667652  | 3.543926  | -1.342572 |
| C  | 4.930516  | 3.948770  | -0.557919 |
| C  | 5.152893  | 2.795409  | 0.443649  |
| C  | 1.729144  | 1.905295  | -0.779699 |
| C  | 2.254088  | -1.131969 | 1.238413  |
| C  | 2.801522  | -1.871745 | 0.045305  |
| C  | 2.064530  | -2.265000 | -1.053266 |
| C  | 4.154826  | -2.990954 | -1.456348 |
| C  | 4.150815  | -2.328687 | -0.193155 |
| C  | 5.355940  | -2.259554 | 0.533541  |
| C  | 6.502441  | -2.838574 | 0.000139  |
| C  | 6.479943  | -3.487951 | -1.252481 |
| N  | 1.493387  | 0.760749  | -0.125260 |
| N  | 3.830952  | 2.157811  | 0.537729  |
| O  | 1.068883  | 2.258443  | -1.782385 |
| H  | 2.560068  | -3.310608 | -2.834475 |
| H  | 1.647495  | 0.801762  | 1.955532  |
| H  | 5.286068  | -4.068911 | -2.963764 |
| H  | 2.312756  | 3.608412  | 0.343381  |
| H  | 3.147536  | 4.391442  | -1.793908 |
| H  | 3.911683  | 2.830528  | -2.137981 |
| H  | 4.749413  | 4.884746  | -0.017282 |
| H  | 5.800028  | 4.102161  | -1.202770 |
| H  | 5.490681  | 3.143187  | 1.425589  |
| H  | 5.880304  | 2.058147  | 0.086022  |
| H  | 1.226526  | -1.463619 | 1.423186  |
| H  | 2.836817  | -1.362043 | 2.134488  |
| H  | 1.013110  | -2.111086 | -1.254293 |
| H  | 5.385929  | -1.734679 | 1.482404  |
| H  | 7.436396  | -2.786660 | 0.553833  |
| H  | 7.393084  | -3.928074 | -1.644435 |
| H  | 0.171342  | 0.046554  | -0.396736 |
| Fe | -2.237524 | 0.002843  | 0.045795  |
| N  | -2.657373 | 1.046801  | -1.626583 |
| N  | -1.421310 | 1.670421  | 0.862033  |
| N  | -3.128449 | -1.623699 | -0.725794 |
| N  | -1.976109 | -0.968611 | 1.791746  |
| C  | -3.295802 | 0.572216  | -2.746433 |
| C  | -0.975913 | 1.825300  | 2.155099  |
| C  | -2.286066 | 2.330392  | -1.915959 |
| C  | -1.258419 | 2.888306  | 0.257870  |
| C  | -3.704036 | -1.734323 | -1.964927 |
| C  | -1.416798 | -0.473102 | 2.940514  |
| C  | -3.232456 | -2.862628 | -0.145476 |
| C  | -2.221532 | -2.299368 | 2.033969  |
| C  | -3.339193 | 1.593811  | -3.763185 |
| C  | -0.509555 | 3.173927  | 2.361755  |
| C  | -2.706249 | 2.684785  | -3.248803 |

TS from **SI-PC-II** to **SI-R-II**

|   |           |           |           |
|---|-----------|-----------|-----------|
| C | -0.680314 | 3.832687  | 1.181731  |
| C | -4.186768 | -3.076704 | -2.172127 |
| C | -1.323915 | -1.507698 | 3.939273  |
| C | -3.888165 | -3.779887 | -1.043658 |
| C | -1.817547 | -2.644832 | 3.372746  |
| H | -3.790244 | 1.470445  | -4.739083 |
| H | -0.109847 | 3.549496  | 3.294635  |
| H | -2.530500 | 3.646511  | -3.712583 |
| H | -0.454076 | 4.863908  | 0.944095  |
| H | -4.682330 | -3.419791 | -3.070894 |
| H | -0.922212 | -1.367003 | 4.934217  |
| H | -4.090240 | -4.819559 | -0.821373 |
| H | -1.909301 | -3.631864 | 3.806910  |
| C | -3.795906 | -0.712533 | -2.904407 |
| C | -0.966628 | 0.833425  | 3.123150  |
| C | -2.796395 | -3.187541 | 1.134301  |
| C | -1.615953 | 3.190579  | -1.050092 |
| H | -4.277225 | -0.946674 | -3.848453 |
| H | -0.569300 | 1.090650  | 4.099662  |
| H | -2.936725 | -4.211640 | 1.464787  |
| H | -1.398308 | 4.190028  | -1.409585 |
| O | -0.708696 | -0.527651 | -0.580195 |
| S | -4.346376 | 0.809579  | 0.771725  |
| C | -5.039156 | -0.304895 | 2.049446  |
| H | -4.440599 | -0.293232 | 2.963552  |
| H | -6.043096 | 0.064705  | 2.281322  |
| H | -5.120011 | -1.330381 | 1.680053  |

Compound **SI-R-II**

|     |           |           |           |
|-----|-----------|-----------|-----------|
| O 2 |           |           |           |
| N   | 2.644043  | -1.781181 | -1.140983 |
| C   | -1.130295 | 0.808909  | 0.799360  |
| O   | -0.283326 | 1.685774  | 0.916388  |
| C   | -0.917929 | -0.637102 | 1.384117  |
| C   | 4.381714  | 0.032908  | -1.371507 |
| C   | -3.322762 | -0.099010 | 0.076513  |
| C   | -4.134917 | 0.324925  | -1.157262 |
| C   | -4.111774 | 1.862295  | -1.064586 |
| C   | -2.709488 | 2.196369  | -0.519161 |
| C   | -2.678551 | -1.481357 | 0.004227  |
| C   | 0.543061  | -0.888083 | 1.793187  |
| C   | 1.519784  | -0.990193 | 0.652609  |
| C   | 1.598576  | -2.009132 | -0.272380 |
| C   | 3.276346  | -0.604311 | -0.796553 |
| C   | 2.590200  | -0.074818 | 0.333420  |
| C   | 3.043337  | 1.136104  | 0.889126  |
| C   | 4.143521  | 1.770833  | 0.324898  |
| C   | 4.807152  | 1.225156  | -0.794924 |
| N   | -1.380538 | -1.611196 | 0.438871  |
| N   | -2.316731 | 0.965127  | 0.187870  |
| O   | -3.303049 | -2.444474 | -0.439334 |
| H   | 2.896872  | -2.379485 | -1.913237 |
| H   | -1.556082 | -0.647103 | 2.288131  |
| H   | 4.889063  | -0.388969 | -2.235061 |
| H   | -3.971670 | -0.095328 | 0.967502  |

|   |           |           |           |
|---|-----------|-----------|-----------|
| H | -5.142356 | -0.095347 | -1.147955 |
| H | -3.629067 | -0.019938 | -2.066013 |
| H | -4.878412 | 2.205780  | -0.361387 |
| H | -4.300826 | 2.345534  | -2.026451 |
| H | -2.706319 | 3.050561  | 0.164191  |
| H | -1.984916 | 2.399219  | -1.315784 |
| H | 0.547744  | -1.813649 | 2.381404  |
| H | 0.843356  | -0.084002 | 2.470554  |
| H | 0.978621  | -2.886849 | -0.379164 |
| H | 2.527822  | 1.576402  | 1.737441  |
| H | 4.498472  | 2.706920  | 0.748002  |
| H | 5.663427  | 1.745647  | -1.215417 |

TS from **SI-R-II** to **SI-R-III**

|     |           |           |           |
|-----|-----------|-----------|-----------|
| O 2 |           |           |           |
| N   | 2.054588  | -1.702855 | -0.920267 |
| C   | -1.285375 | 0.527119  | 1.430980  |
| O   | -0.896443 | 1.486723  | 2.105933  |
| C   | -0.832201 | -0.921629 | 1.700817  |
| C   | 3.141042  | 0.408001  | -1.773276 |
| C   | -2.587282 | -0.472826 | -0.440516 |
| C   | -3.056809 | 0.224715  | -1.723386 |
| C   | -3.609956 | 1.566608  | -1.209244 |
| C   | -2.660827 | 1.949133  | -0.060258 |
| C   | -1.436582 | -1.483161 | -0.612862 |
| C   | 0.584753  | -0.934887 | 2.333706  |
| C   | 1.508491  | -0.972254 | 1.156546  |
| C   | 1.423875  | -2.059332 | 0.237002  |
| C   | 2.496783  | -0.389081 | -0.832173 |
| C   | 2.161418  | 0.089889  | 0.471328  |
| C   | 2.474986  | 1.422340  | 0.814730  |
| C   | 3.126193  | 2.216795  | -0.118700 |
| C   | 3.457796  | 1.714810  | -1.394976 |
| N   | -0.745542 | -1.775335 | 0.508010  |
| N   | -2.155522 | 0.651531  | 0.409468  |
| O   | -1.227853 | -2.011393 | -1.713728 |
| H   | 2.124856  | -2.289303 | -1.739226 |
| H   | -1.560154 | -1.353338 | 2.407149  |
| H   | 3.384922  | 0.033421  | -2.762814 |
| H   | -3.431780 | -0.996424 | 0.035195  |
| H   | -3.796192 | -0.368235 | -2.266828 |
| H   | -2.197804 | 0.378683  | -2.384721 |
| H   | -4.627634 | 1.432125  | -0.825003 |
| H   | -3.645947 | 2.336580  | -1.984868 |
| H   | -3.157964 | 2.485818  | 0.753694  |
| H   | -1.821869 | 2.567573  | -0.402367 |
| H   | 0.706991  | -1.828549 | 2.955336  |
| H   | 0.723044  | -0.051847 | 2.958568  |
| H   | 1.233769  | -3.099462 | 0.444966  |
| H   | 2.202206  | 1.815093  | 1.789175  |
| H   | 3.380256  | 3.242796  | 0.130272  |
| H   | 3.965163  | 2.361605  | -2.104951 |

Compound **SI-R-III**

O 2

|   |           |           |           |
|---|-----------|-----------|-----------|
| N | -1.634781 | -1.658743 | -0.712899 |
| C | 1.506274  | 1.567482  | -0.154578 |
| O | 1.289192  | 2.670708  | 0.346353  |
| C | 0.755073  | 1.038723  | -1.387324 |
| C | -3.304927 | -1.425570 | 1.142572  |
| C | 2.677383  | -0.633732 | -0.275697 |
| C | 3.411967  | -1.374954 | 0.849997  |
| C | 4.199742  | -0.253039 | 1.549491  |
| C | 3.250679  | 0.956017  | 1.502868  |
| C | 1.368101  | -1.288041 | -0.726507 |
| C | -0.635159 | 1.703001  | -1.624591 |
| C | -1.597803 | 0.590322  | -1.339798 |
| C | -0.930233 | -0.743561 | -1.583446 |
| C | -2.516513 | -0.960855 | 0.094344  |
| C | -2.538967 | 0.420425  | -0.299025 |
| C | -3.374652 | 1.321822  | 0.393154  |
| C | -4.168361 | 0.849252  | 1.434670  |
| C | -4.133360 | -0.507518 | 1.803256  |
| N | 0.474856  | -0.406728 | -1.227093 |
| N | 2.439614  | 0.703610  | 0.301756  |
| O | 1.162150  | -2.500586 | -0.626376 |
| H | -1.174033 | -2.512178 | -0.426085 |
| H | 1.408610  | 1.193394  | -2.257627 |
| H | -3.272493 | -2.467841 | 1.446986  |
| H | 3.329629  | -0.547663 | -1.159799 |
| H | 4.046275  | -2.176432 | 0.465264  |
| H | 2.679024  | -1.822222 | 1.529485  |
| H | 5.116531  | -0.031114 | 0.991515  |
| H | 4.485357  | -0.511679 | 2.572487  |
| H | 3.769873  | 1.914922  | 1.417145  |
| H | 2.598707  | 1.005172  | 2.383523  |
| H | -0.696716 | 2.068473  | -2.657054 |
| H | -0.758934 | 2.559516  | -0.957255 |
| H | -0.943585 | -1.108738 | -2.620713 |
| H | -3.394087 | 2.371118  | 0.111483  |
| H | -4.819868 | 1.533436  | 1.970662  |
| H | -4.758319 | -0.854737 | 2.621519  |

TS from **SI-R-III** to **SI-R-IV**

0 2

|   |           |           |           |
|---|-----------|-----------|-----------|
| N | 0.265708  | 0.489845  | -1.431330 |
| C | -3.102061 | -0.299133 | 1.399508  |
| O | -3.569103 | 0.553118  | 2.155126  |
| C | -1.626946 | -0.733673 | 1.418794  |
| C | -0.303932 | 2.861026  | -2.044520 |
| C | -3.256682 | -1.963198 | -0.448991 |
| C | -4.309087 | -2.047212 | -1.563253 |
| C | -5.628170 | -1.769166 | -0.820289 |
| C | -5.252241 | -0.703634 | 0.222744  |
| C | -1.859650 | -1.542618 | -0.916885 |
| C | -0.658815 | 0.290992  | 2.059553  |
| C | 0.237476  | 0.763580  | 0.922416  |
| C | 0.185109  | -0.276263 | -0.201179 |
| C | -0.049512 | 1.820228  | -1.152825 |
| C | -0.055024 | 2.034553  | 0.246374  |

|   |           |           |           |
|---|-----------|-----------|-----------|
| C | -0.303496 | 3.312377  | 0.751533  |
| C | -0.553996 | 4.364950  | -0.137298 |
| C | -0.554612 | 4.135698  | -1.518381 |
| N | -1.135600 | -0.922788 | 0.040417  |
| N | -3.829957 | -0.971780 | 0.481196  |
| O | -1.458994 | -1.748919 | -2.066965 |
| H | -0.111076 | 0.036184  | -2.256286 |
| H | -1.583391 | -1.690948 | 1.959163  |
| H | -0.314333 | 2.688517  | -3.117350 |
| H | -3.161243 | -2.938052 | 0.056518  |
| H | -4.292303 | -3.014701 | -2.069735 |
| H | -4.108421 | -1.272667 | -2.310731 |
| H | -5.976438 | -2.678506 | -0.317294 |
| H | -6.425347 | -1.429515 | -1.486781 |
| H | -5.828344 | -0.778003 | 1.149628  |
| H | -5.371031 | 0.315547  | -0.165134 |
| H | -0.094538 | -0.195297 | 2.859205  |
| H | -1.231016 | 1.109055  | 2.503659  |
| H | 0.967053  | -1.041636 | -0.163663 |
| H | -0.316232 | 3.486458  | 1.825023  |
| H | -0.753941 | 5.361395  | 0.246319  |
| H | -0.756964 | 4.958333  | -2.199461 |
| N | 4.612971  | 0.341156  | -1.222571 |
| C | 3.001693  | 1.230941  | 0.487554  |
| C | 5.364913  | -3.165980 | -0.245745 |
| C | 4.885589  | -1.753666 | -0.409610 |
| C | 5.248712  | -0.871348 | -1.406146 |
| C | 3.807945  | 0.267939  | -0.101945 |
| C | 3.969451  | -1.046907 | 0.435380  |
| C | 3.288990  | -1.369186 | 1.637875  |
| C | 2.470190  | -0.435282 | 2.228870  |
| C | 2.195451  | 0.850824  | 1.614223  |
| H | 4.686095  | 1.135361  | -1.840357 |
| H | 2.917798  | 2.229792  | 0.070476  |
| H | 4.533512  | -3.882529 | -0.266057 |
| H | 6.059179  | -3.441529 | -1.046287 |
| H | 5.921990  | -1.016140 | -2.240212 |
| H | 3.444542  | -2.336684 | 2.109677  |
| H | 1.995766  | -0.670620 | 3.177130  |
| H | 1.897289  | 1.653397  | 2.287298  |
| H | 5.886538  | -3.310882 | 0.709442  |

Compound **SI-R-IV**

0 2

|   |           |           |           |
|---|-----------|-----------|-----------|
| N | 0.098901  | 1.051300  | -1.574953 |
| C | -3.065573 | -0.584440 | 1.445621  |
| O | -3.536363 | -0.054982 | 2.452857  |
| C | -1.558598 | -0.638766 | 1.176721  |
| C | -0.102977 | 3.550690  | -1.712833 |
| C | -3.278238 | -1.784768 | -0.736549 |
| C | -4.466217 | -1.720217 | -1.707018 |
| C | -5.677065 | -1.903360 | -0.774946 |
| C | -5.288394 | -1.140623 | 0.504459  |
| C | -2.005637 | -1.099597 | -1.230571 |
| C | -0.767619 | 0.515645  | 1.809384  |

|   |           |           |           |
|---|-----------|-----------|-----------|
| C | 0.387181  | 0.857149  | 0.812919  |
| C | 0.063664  | 0.071998  | -0.505960 |
| C | 0.068491  | 2.337354  | -1.041991 |
| C | 0.303493  | 2.303019  | 0.343569  |
| C | 0.386173  | 3.484933  | 1.068556  |
| C | 0.226188  | 4.711746  | 0.406382  |
| C | -0.020450 | 4.734052  | -0.969459 |
| N | -1.268575 | -0.515932 | -0.258831 |
| N | -3.816917 | -1.169769 | 0.487644  |
| O | -1.689917 | -1.100503 | -2.424007 |
| H | -0.416806 | 0.815927  | -2.414236 |
| H | -1.184677 | -1.605931 | 1.548713  |
| H | -0.293906 | 3.575357  | -2.782212 |
| H | -3.016797 | -2.837888 | -0.540819 |
| H | -4.398846 | -2.480233 | -2.488047 |
| H | -4.489185 | -0.737588 | -2.190666 |
| H | -5.819775 | -2.966234 | -0.549416 |
| H | -6.606690 | -1.527118 | -1.209823 |
| H | -5.671148 | -1.604733 | 1.418309  |
| H | -5.631258 | -0.099353 | 0.489796  |
| H | -0.401506 | 0.248634  | 2.803109  |
| H | -1.427869 | 1.376228  | 1.933279  |
| H | 0.770914  | -0.739261 | -0.706337 |
| H | 0.561846  | 3.463945  | 2.141964  |
| H | 0.287716  | 5.641520  | 0.964383  |
| H | -0.152437 | 5.686520  | -1.476646 |
| N | 4.827437  | -0.008359 | -0.944487 |
| C | 2.918302  | 0.852849  | 0.423305  |
| C | 5.141064  | -3.633303 | -0.185239 |
| C | 4.788338  | -2.179008 | -0.302936 |
| C | 5.424120  | -1.244193 | -1.105212 |
| C | 3.781910  | -0.114483 | -0.040617 |
| C | 3.749720  | -1.484223 | 0.376989  |
| C | 2.773378  | -1.867126 | 1.354234  |
| C | 1.887564  | -0.960743 | 1.840349  |
| C | 1.818897  | 0.484585  | 1.389363  |
| H | 5.088543  | 0.832082  | -1.437509 |
| H | 2.986814  | 1.882100  | 0.085806  |
| H | 4.306991  | -4.280063 | -0.486891 |
| H | 5.998766  | -3.882851 | -0.818355 |
| H | 6.260925  | -1.369627 | -1.778436 |
| H | 2.758423  | -2.890319 | 1.724470  |
| H | 1.185055  | -1.272397 | 2.608673  |
| H | 1.903544  | 1.126221  | 2.287369  |
| H | 5.399407  | -3.906765 | 0.846009  |

Compound **SI-PDT<sub>C-c</sub>**

0 1

|   |           |           |           |
|---|-----------|-----------|-----------|
| N | -0.438727 | 0.477825  | -1.938170 |
| C | -2.844336 | -0.568978 | 1.584112  |
| O | -2.782404 | 0.067747  | 2.635303  |
| C | -1.645382 | -1.304830 | 0.960532  |
| C | -0.928155 | 2.910736  | -1.510061 |
| C | -4.022475 | -1.469358 | -0.415412 |
| C | -5.326405 | -0.976539 | -1.058309 |

|   |           |           |           |
|---|-----------|-----------|-----------|
| C | -6.223145 | -0.671484 | 0.155027  |
| C | -5.254692 | -0.091494 | 1.198913  |
| C | -2.761785 | -1.211069 | -1.247230 |
| C | -0.263357 | -0.831207 | 1.436049  |
| C | 0.401925  | -0.099049 | 0.235790  |
| C | -0.331410 | -0.655094 | -1.037150 |
| C | -0.494395 | 1.635187  | -1.148104 |
| C | -0.004895 | 1.371142  | 0.141423  |
| C | 0.051025  | 2.386785  | 1.087698  |
| C | -0.380719 | 3.675178  | 0.738967  |
| C | -0.862095 | 3.926691  | -0.549036 |
| N | -1.637367 | -1.110858 | -0.500239 |
| N | -3.974078 | -0.728873 | 0.860368  |
| O | -2.792362 | -1.090933 | -2.475260 |
| H | -1.142084 | 0.360033  | -2.661409 |
| H | -1.778140 | -2.372384 | 1.190065  |
| H | -1.313205 | 3.108633  | -2.506587 |
| H | -4.081035 | -2.551904 | -0.217190 |
| H | -5.753592 | -1.717960 | -1.737065 |
| H | -5.124951 | -0.068661 | -1.636075 |
| H | -6.672689 | -1.596175 | 0.534499  |
| H | -7.034364 | 0.021582  | -0.082760 |
| H | -5.534285 | -0.323943 | 2.230508  |
| H | -5.159411 | 0.998039  | 1.113778  |
| H | 0.339814  | -1.687996 | 1.741830  |
| H | -0.369848 | -0.174859 | 2.302573  |
| H | 0.180151  | -1.489385 | -1.522536 |
| H | 0.420133  | 2.188004  | 2.090967  |
| H | -0.346015 | 4.474885  | 1.472992  |
| H | -1.200853 | 4.925766  | -0.811058 |
| N | 5.287597  | 1.266488  | 0.116899  |
| C | 2.829704  | 0.721944  | 0.179606  |
| C | 7.093687  | -1.977626 | -0.077088 |
| C | 6.132317  | -0.829120 | 0.003164  |
| C | 6.442632  | 0.508538  | 0.044949  |
| C | 4.196669  | 0.425539  | 0.121799  |
| C | 4.693061  | -0.904573 | 0.051214  |
| C | 3.760983  | -1.957778 | 0.039219  |
| C | 2.405941  | -1.666100 | 0.100428  |
| C | 1.919985  | -0.333098 | 0.174107  |
| H | 2.490303  | 1.750850  | 0.225345  |
| H | 6.929921  | -2.583607 | -0.977961 |
| H | 8.129501  | -1.623207 | -0.100683 |
| H | 7.410997  | 0.990461  | 0.029169  |
| H | 4.093022  | -2.991383 | -0.018608 |
| H | 1.696742  | -2.490085 | 0.088676  |
| H | 6.994076  | -2.653529 | 0.782519  |
| H | 5.253870  | 2.274163  | 0.153016  |

Compound **SI-C-III**

1 1

|   |           |           |           |
|---|-----------|-----------|-----------|
| N | -1.653726 | -1.554632 | -0.457652 |
| C | 1.744958  | 1.562715  | -0.100231 |
| O | 1.638618  | 2.676386  | 0.408882  |
| C | 0.802434  | 1.074953  | -1.212377 |

|   |           |           |           |
|---|-----------|-----------|-----------|
| C | -3.770019 | -1.468938 | 0.842437  |
| C | 2.770709  | -0.708030 | -0.344519 |
| C | 3.588057  | -1.483869 | 0.699652  |
| C | 4.519506  | -0.404333 | 1.277999  |
| C | 3.645765  | 0.859707  | 1.328363  |
| C | 1.394802  | -1.301192 | -0.645228 |
| C | -0.572421 | 1.806822  | -1.245228 |
| C | -1.536262 | 0.702769  | -0.979658 |
| C | -0.911778 | -0.627608 | -1.292280 |
| C | -2.720259 | -0.934950 | 0.063988  |
| C | -2.655577 | 0.500486  | -0.219783 |
| C | -3.621385 | 1.386893  | 0.361522  |
| C | -4.615169 | 0.844769  | 1.123256  |
| C | -4.683339 | -0.574383 | 1.351158  |
| N | 0.473922  | -0.352342 | -0.976457 |
| N | 2.674684  | 0.646096  | 0.239742  |
| O | 1.132005  | -2.496908 | -0.591291 |
| H | -1.505145 | -2.556142 | -0.493200 |
| H | 1.316747  | 1.184702  | -2.175732 |
| H | -3.837361 | -2.532144 | 1.042767  |
| H | 3.320315  | -0.665772 | -1.298334 |
| H | 4.122081  | -2.325160 | 0.253641  |
| H | 2.917386  | -1.877840 | 1.470523  |
| H | 5.371984  | -0.244943 | 0.608806  |
| H | 4.910962  | -0.670994 | 2.262627  |
| H | 4.205211  | 1.783673  | 1.159792  |
| H | 3.109848  | 0.956902  | 2.279703  |
| H | -0.748162 | 2.278716  | -2.218935 |
| H | -0.609577 | 2.590263  | -0.483680 |
| H | -1.050071 | -0.923941 | -2.345653 |
| H | -3.562730 | 2.452737  | 0.170325  |
| H | -5.375267 | 1.477656  | 1.567687  |
| H | -5.495508 | -0.952256 | 1.965084  |

TS from **SI-C-III** to **SI-C-IV**

1 1

|   |           |           |           |
|---|-----------|-----------|-----------|
| N | 0.282788  | 0.644691  | -1.446866 |
| C | -3.035039 | -0.389201 | 1.421128  |
| O | -3.531108 | 0.407198  | 2.215769  |
| C | -1.531379 | -0.715268 | 1.398055  |
| C | -0.269550 | 3.011137  | -2.043863 |
| C | -3.112645 | -1.999073 | -0.483448 |
| C | -4.183456 | -2.123295 | -1.577146 |
| C | -5.499021 | -1.963915 | -0.793860 |
| C | -5.175577 | -0.904735 | 0.271996  |
| C | -1.759754 | -1.474374 | -0.968661 |
| C | -0.636728 | 0.371172  | 2.049927  |
| C | 0.190495  | 0.889011  | 0.886202  |
| C | 0.220127  | -0.147416 | -0.237137 |
| C | -0.018186 | 1.949740  | -1.162944 |
| C | -0.057927 | 2.147597  | 0.250339  |
| C | -0.353364 | 3.418641  | 0.782611  |
| C | -0.596875 | 4.464374  | -0.090186 |
| C | -0.552690 | 4.252805  | -1.489209 |
| N | -1.066862 | -0.816354 | -0.001759 |

|   |           |           |           |
|---|-----------|-----------|-----------|
| N | -3.729250 | -1.076520 | 0.490697  |
| O | -1.346541 | -1.626115 | -2.116799 |
| H | 0.063298  | 0.197034  | -2.328912 |
| H | -1.390797 | -1.677693 | 1.908673  |
| H | -0.249759 | 2.864305  | -3.118668 |
| H | -2.936877 | -2.979302 | -0.011989 |
| H | -4.109473 | -3.071746 | -2.112988 |
| H | -4.058485 | -1.313680 | -2.303678 |
| H | -5.768343 | -2.910457 | -0.312289 |
| H | -6.333961 | -1.662946 | -1.431453 |
| H | -5.719284 | -1.047853 | 1.209713  |
| H | -5.373795 | 0.114107  | -0.081442 |
| H | -0.037598 | -0.066421 | 2.846452  |
| H | -1.260423 | 1.155482  | 2.483610  |
| H | 1.042700  | -0.869174 | -0.197649 |
| H | -0.386353 | 3.569928  | 1.857523  |
| H | -0.827775 | 5.452743  | 0.292730  |
| H | -0.754449 | 5.089075  | -2.152370 |
| N | 4.420825  | 0.137988  | -1.342505 |
| C | 2.951644  | 1.204971  | 0.387142  |
| C | 5.123178  | -3.304831 | -0.128381 |
| C | 4.678623  | -1.892112 | -0.363693 |
| C | 4.999878  | -1.093182 | -1.454821 |
| C | 3.701266  | 0.187841  | -0.163676 |
| C | 3.855940  | -1.090782 | 0.472363  |
| C | 3.234678  | -1.307586 | 1.730636  |
| C | 2.494841  | -0.296450 | 2.296499  |
| C | 2.275395  | 0.950977  | 1.616826  |
| H | 4.509435  | 0.887728  | -2.014137 |
| H | 2.853375  | 2.168753  | -0.102255 |
| H | 4.268135  | -3.987492 | -0.054004 |
| H | 5.760536  | -3.656043 | -0.944905 |
| H | 5.616076  | -1.332193 | -2.311271 |
| H | 3.370866  | -2.250598 | 2.251348  |
| H | 2.063810  | -0.436985 | 3.282400  |
| H | 1.971117  | 1.806099  | 2.212811  |
| H | 5.693454  | -3.396254 | 0.803823  |

Compound **SI-C-IV**

1 1

|   |           |           |           |
|---|-----------|-----------|-----------|
| N | 0.168642  | 0.394571  | -1.466474 |
| C | -3.072888 | -0.431485 | 1.424746  |
| O | -3.381382 | 0.357176  | 2.316885  |
| C | -1.668132 | -1.048162 | 1.294805  |
| C | -0.641526 | 2.772177  | -1.691039 |
| C | -3.515386 | -1.785976 | -0.618621 |
| C | -4.618686 | -1.589365 | -1.668184 |
| C | -5.857771 | -1.263766 | -0.815443 |
| C | -5.306373 | -0.403603 | 0.333660  |
| C | -2.101522 | -1.468799 | -1.111697 |
| C | -0.555606 | -0.271073 | 2.021804  |
| C | 0.352193  | 0.311056  | 0.910478  |
| C | 0.094140  | -0.550155 | -0.364885 |
| C | -0.231841 | 1.646064  | -0.976878 |
| C | -0.112376 | 1.676774  | 0.422680  |

|   |           |           |           |   |           |           |           |
|---|-----------|-----------|-----------|---|-----------|-----------|-----------|
| C | -0.388286 | 2.842772  | 1.128523  | H | 3.652981  | -3.442190 | 1.512097  |
| C | -0.798885 | 3.981136  | 0.423350  | H | 2.896273  | 2.223553  | -1.327301 |
| C | -0.923516 | 3.937355  | -0.969907 | H | 3.068620  | 2.984899  | 0.255797  |
| N | -1.259926 | -1.080984 | -0.119984 | H | 2.249127  | 1.288281  | 2.208969  |
| N | -3.917616 | -0.872197 | 0.469045  | H | 5.012467  | -0.030086 | -1.918835 |
| O | -1.773660 | -1.547210 | -2.296960 | H | 5.808033  | -2.375661 | -2.076517 |
| H | -0.245371 | 0.055398  | -2.330422 | H | 5.137357  | -4.057695 | -0.388453 |
| H | -1.730707 | -2.073238 | 1.686633  | H | 4.497292  | 2.372197  | -0.597641 |
| H | -0.742231 | 2.744607  | -2.772042 | N | 0.237898  | 0.592625  | -1.530339 |
| H | -3.518144 | -2.826036 | -0.254411 | C | -2.907903 | -0.400917 | 1.474694  |
| H | -4.745298 | -2.472641 | -2.297613 | O | -3.284239 | 0.382243  | 2.346842  |
| H | -4.356684 | -0.747306 | -2.317050 | C | -1.451716 | -0.875370 | 1.333131  |
| H | -6.294573 | -2.186115 | -0.416554 | C | -0.345976 | 3.014071  | -1.872188 |
| H | -6.634128 | -0.743444 | -1.382000 | C | -3.263977 | -1.865202 | -0.510805 |
| H | -5.844700 | -0.536664 | 1.276164  | C | -4.400168 | -1.801877 | -1.540997 |
| H | -5.311186 | 0.665698  | 0.090407  | C | -5.648013 | -1.567559 | -0.671164 |
| H | -0.017079 | -0.941926 | 2.691280  | C | -5.156194 | -0.628298 | 0.442965  |
| H | -0.997211 | 0.517358  | 2.634675  | C | -1.891573 | -1.441454 | -1.044418 |
| H | 0.800398  | -1.372166 | -0.512287 | C | -0.402941 | 0.059412  | 1.987616  |
| H | -0.302018 | 2.873679  | 2.211940  | C | 0.384180  | 0.643635  | 0.827352  |
| H | -1.028041 | 4.896268  | 0.960380  | C | 0.236410  | -0.285853 | -0.376624 |
| H | -1.250461 | 4.823887  | -1.506250 | C | -0.035763 | 1.893012  | -1.105712 |
| N | 4.779457  | 0.844622  | -1.151920 | C | 0.073350  | 1.972228  | 0.306369  |
| C | 2.714170  | 0.992737  | 0.227382  | C | -0.120897 | 3.199507  | 0.947371  |
| C | 6.429390  | -2.348788 | -0.210321 | C | -0.423074 | 4.332120  | 0.182392  |
| C | 5.543922  | -1.148574 | -0.366203 | C | -0.534593 | 4.235436  | -1.210224 |
| C | 5.758958  | -0.070808 | -1.249783 | N | -1.073428 | -0.942483 | -0.091731 |
| C | 3.862599  | 0.415356  | -0.193826 | N | -3.727211 | -0.956552 | 0.555517  |
| C | 4.352643  | -0.851884 | 0.303651  | O | -1.588171 | -1.541287 | -2.237306 |
| C | 3.599154  | -1.529113 | 1.315608  | H | -0.199164 | 0.223267  | -2.367341 |
| C | 2.451074  | -0.974347 | 1.775609  | H | -1.399270 | -1.880670 | 1.776458  |
| C | 1.902901  | 0.336331  | 1.294319  | H | -0.444551 | 2.943542  | -2.952049 |
| H | 4.719801  | 1.701220  | -1.687705 | H | -3.169362 | -2.888904 | -0.113658 |
| H | 2.371589  | 1.940826  | -0.173234 | H | -4.456364 | -2.710294 | -2.144656 |
| H | 5.915727  | -3.264608 | -0.524454 | H | -4.229093 | -0.958139 | -2.217519 |
| H | 7.334612  | -2.248246 | -0.814988 | H | -5.989578 | -2.514767 | -0.238440 |
| H | 6.578373  | 0.069944  | -1.943049 | H | -6.480858 | -1.137123 | -1.233309 |
| H | 3.956770  | -2.473638 | 1.712877  | H | -5.660140 | -0.786924 | 1.400823  |
| H | 1.905312  | -1.482826 | 2.561932  | H | -5.271793 | 0.428904  | 0.174379  |
| H | 1.937171  | 1.026408  | 2.159582  | H | 0.220693  | -0.525185 | 2.672244  |
| H | 6.734403  | -2.483403 | 0.833155  | H | -0.909953 | 0.826679  | 2.577619  |

Figure S23B Radical C2 TS

0 2

|   |          |           |           |
|---|----------|-----------|-----------|
| N | 2.714778 | -0.758670 | 1.803598  |
| C | 3.944439 | -2.701281 | 0.772631  |
| C | 3.440973 | 2.172721  | -0.375352 |
| C | 3.276231 | 0.843215  | 0.290893  |
| C | 2.468096 | 0.569027  | 1.427761  |
| C | 3.507543 | -1.378260 | 0.861669  |
| C | 3.875989 | -0.388977 | -0.102480 |
| C | 4.717248 | -0.762373 | -1.171968 |
| C | 5.159781 | -2.077524 | -1.256967 |
| C | 4.776917 | -3.036769 | -0.296497 |
| H | 2.315984 | -1.212909 | 2.610401  |

Figure S23B Radical C2 Product

0 2

|   |          |           |           |
|---|----------|-----------|-----------|
| N | 1.989245 | -1.239008 | 1.313234  |
| C | 3.473386 | -3.169335 | 0.716716  |
| C | 3.540872 | 1.671307  | -0.564656 |
| C | 3.104180 | 0.371460  | 0.027350  |
| C | 2.010592 | 0.216728  | 1.068173  |
| C | 3.051171 | -1.848357 | 0.654952  |
| C | 3.701829 | -0.886102 | -0.182984 |

|   |           |           |           |
|---|-----------|-----------|-----------|
| C | 4.780775  | -1.309937 | -0.996541 |
| C | 5.196149  | -2.637831 | -0.938317 |
| C | 4.557580  | -3.557643 | -0.089115 |
| H | 1.767606  | -1.556833 | 2.248179  |
| H | 2.978469  | -3.884855 | 1.367961  |
| H | 2.857418  | 2.025325  | -1.348168 |
| H | 3.585354  | 2.465202  | 0.191765  |
| H | 2.289873  | 0.757330  | 1.991105  |
| H | 5.285297  | -0.603088 | -1.649460 |
| H | 6.027721  | -2.967990 | -1.555100 |
| H | 4.902858  | -4.587232 | -0.054931 |
| H | 4.535298  | 1.576800  | -1.014210 |
| N | 0.054983  | 1.282895  | -1.599473 |
| C | -2.825086 | -0.758997 | 1.480920  |
| O | -3.163962 | -0.402773 | 2.610191  |
| C | -1.360601 | -0.775411 | 1.035390  |
| C | -0.075611 | 3.778144  | -1.343442 |
| C | -3.319260 | -1.578969 | -0.829262 |
| C | -4.605521 | -1.332591 | -1.630673 |
| C | -5.709313 | -1.657777 | -0.608692 |
| C | -5.154541 | -1.133735 | 0.728457  |
| C | -2.085615 | -0.844045 | -1.348495 |
| C | -0.482044 | 0.268094  | 1.739982  |
| C | 0.580212  | 0.729453  | 0.687629  |
| C | 0.091414  | 0.154869  | -0.687664 |
| C | 0.123273  | 2.475322  | -0.881381 |
| C | 0.510267  | 2.230003  | 0.447543  |
| C | 0.712971  | 3.287724  | 1.324982  |
| C | 0.529376  | 4.602623  | 0.870839  |
| C | 0.134092  | 4.835037  | -0.449748 |
| N | -1.229104 | -0.431690 | -0.386474 |
| N | -3.695847 | -1.169960 | 0.533679  |
| O | -1.899690 | -0.662650 | -2.555131 |
| H | -0.557035 | 1.185508  | -2.400915 |
| H | -0.961399 | -1.786217 | 1.210227  |
| H | -0.381662 | 3.966355  | -2.368775 |
| H | -3.076206 | -2.654331 | -0.842107 |
| H | -4.651417 | -1.947840 | -2.531490 |
| H | -4.650210 | -0.281142 | -1.934836 |
| H | -5.861322 | -2.741590 | -0.553016 |
| H | -6.668689 | -1.199157 | -0.861746 |
| H | -5.442932 | -1.748148 | 1.586592  |
| H | -5.467528 | -0.103657 | 0.935504  |
| H | -0.030474 | -0.141514 | 2.646563  |
| H | -1.101879 | 1.113139  | 2.046043  |
| H | 0.741093  | -0.634175 | -1.079566 |
| H | 1.000551  | 3.103364  | 2.357720  |
| H | 0.686573  | 5.437210  | 1.547731  |
| H | -0.016360 | 5.855066  | -0.794077 |

Figure S23B Radical C3 TS

O 2

|   |           |           |           |
|---|-----------|-----------|-----------|
| N | 0.447129  | -0.050752 | -1.463984 |
| C | -2.919196 | 0.064156  | 1.391562  |
| O | -3.069446 | 0.981014  | 2.199269  |

|   |           |           |           |
|---|-----------|-----------|-----------|
| C | -1.681680 | -0.848689 | 1.358796  |
| C | 0.432169  | 2.417325  | -1.926838 |
| C | -3.624041 | -1.350042 | -0.533532 |
| C | -4.653126 | -1.027837 | -1.626119 |
| C | -5.798378 | -0.360273 | -0.843508 |
| C | -5.080094 | 0.471348  | 0.231716  |
| C | -2.167901 | -1.383875 | -1.012064 |
| C | -0.423670 | -0.261870 | 2.040114  |
| C | 0.532824  | 0.072416  | 0.904651  |
| C | 0.176172  | -0.839192 | -0.278918 |
| C | 0.459264  | 1.297197  | -1.099579 |
| C | 0.516954  | 1.418296  | 0.311660  |
| C | 0.528380  | 2.693363  | 0.887576  |
| C | 0.505890  | 3.825073  | 0.063145  |
| C | 0.462844  | 3.684735  | -1.328539 |
| N | -1.276147 | -1.106091 | -0.035884 |
| N | -3.831531 | -0.272010 | 0.453051  |
| O | -1.863848 | -1.627522 | -2.184545 |
| H | -0.052308 | -0.338151 | -2.298742 |
| H | -1.972600 | -1.794855 | 1.839003  |
| H | 0.376462  | 2.311518  | -3.007005 |
| H | -3.851476 | -2.325535 | -0.073554 |
| H | -4.964758 | -1.921436 | -2.171464 |
| H | -4.211343 | -0.331702 | -2.346512 |
| H | -6.425497 | -1.123445 | -0.368620 |
| H | -6.442145 | 0.254647  | -1.477976 |
| H | -5.643138 | 0.557146  | 1.165626  |
| H | -4.849992 | 1.486068  | -0.116033 |
| H | -0.000523 | -1.012651 | 2.715608  |
| H | -0.701616 | 0.611284  | 2.634449  |
| H | 0.703220  | -1.796382 | -0.313830 |
| H | 0.529356  | 2.810309  | 1.968158  |
| H | 0.510958  | 4.816278  | 0.507875  |
| H | 0.440197  | 4.569781  | -1.959140 |
| N | 3.023256  | -2.520003 | 0.761753  |
| C | 4.345167  | -1.839888 | -1.275953 |
| C | 2.595827  | 0.538547  | 2.718180  |
| C | 2.455057  | -0.435447 | 1.562229  |
| C | 2.428802  | -1.843286 | 1.805852  |
| C | 3.592786  | -1.614714 | -0.121489 |
| C | 3.315026  | -0.312569 | 0.361432  |
| C | 3.842223  | 0.789425  | -0.314993 |
| C | 4.611506  | 0.578233  | -1.462746 |
| C | 4.850815  | -0.721190 | -1.939409 |
| H | 3.072101  | -3.524513 | 0.675478  |
| H | 4.541509  | -2.845915 | -1.636235 |
| H | 2.443103  | 1.570813  | 2.393442  |
| H | 1.878381  | 0.321957  | 3.516206  |
| H | 1.992531  | -2.384995 | 2.632677  |
| H | 3.655381  | 1.798087  | 0.041785  |
| H | 5.028020  | 1.428694  | -1.995186 |
| H | 5.447623  | -0.861390 | -2.836713 |
| H | 3.602236  | 0.470984  | 3.149023  |

Figure S23B Radical C3 Product

O 2  
 N 0.442596 0.602631 -1.589954  
 C -3.028602 -0.247998 1.423820  
 O -3.317107 0.319119 2.478258  
 C -1.605899 -0.718472 1.104887  
 C 0.778510 3.085074 -1.621083  
 C -3.598796 -1.165592 -0.829944  
 C -4.720882 -0.679973 -1.759144  
 C -5.926846 -0.573930 -0.809117  
 C -5.323930 -0.061016 0.511068  
 C -2.184661 -0.846851 -1.311103  
 C -0.503301 0.086440 1.810536  
 C 0.673967 0.236666 0.788442  
 C 0.139993 -0.369504 -0.560733  
 C 0.688146 1.838582 -0.997502  
 C 0.888949 1.696262 0.387943  
 C 1.157671 2.821262 1.161748  
 C 1.257560 4.079353 0.549124  
 C 1.070580 4.201565 -0.830450  
 N -1.305193 -0.565070 -0.323528  
 N -3.926054 -0.517894 0.450625  
 O -1.892059 -0.862442 -2.510668  
 H -0.119223 0.536644 -2.430852  
 H -1.529901 -1.780936 1.384798  
 H 0.618235 3.184245 -2.691149  
 H -3.657708 -2.261141 -0.720071  
 H -4.883545 -1.361988 -2.596083  
 H -4.456806 0.301702 -2.167348  
 H -6.373685 -1.563064 -0.657942  
 H -6.707652 0.090338 -1.188506  
 H -5.821477 -0.462918 1.398775  
 H -5.345829 1.032798 0.582921  
 H -0.198844 -0.416146 2.729582  
 H -0.894146 1.065210 2.094497  
 H 0.586052 -1.338718 -0.802358  
 H 1.274154 2.737876 2.238752  
 H 1.470489 4.958049 1.150914  
 H 1.141970 5.179421 -1.299917  
 N 2.532660 -2.803257 0.853636  
 C 4.300414 -2.486202 -0.902060  
 C 2.575398 0.132571 2.545264  
 C 1.971222 -0.536751 1.283901  
 C 1.633878 -2.000294 1.549537  
 C 3.333605 -2.051525 0.007668  
 C 3.055322 -0.683295 0.207902  
 C 3.788820 0.268137 -0.490486  
 C 4.768980 -0.148962 -1.404633  
 C 5.013380 -1.511536 -1.606447  
 H 2.491810 -3.812027 0.837811  
 H 4.497850 -3.544313 -1.049953  
 H 2.948995 1.136265 2.322129  
 H 1.842098 0.208655 3.356133  
 H 1.227817 -2.373022 2.483603  
 H 3.603993 1.327259 -0.339603  
 H 5.339311 0.591432 -1.958020

H 5.773491 -1.822721 -2.318388  
 H 3.416936 -0.465251 2.909292  
 Figure S23B Radical C4 TS  
 O 2  
 N 4.424266 -2.387935 -0.475959  
 C 3.829139 -0.678768 -2.227623  
 C 3.570014 -0.895868 2.811526  
 C 3.761834 -1.267700 1.369207  
 C 4.373517 -2.414673 0.901565  
 C 3.870874 -1.208372 -0.927611  
 C 3.418715 -0.493148 0.209947  
 C 2.756752 0.777899 0.033154  
 C 2.884204 1.364187 -1.276345  
 C 3.348154 0.634221 -2.366135  
 H 4.873999 -3.081719 -1.054529  
 H 4.204861 -1.236537 -3.080288  
 H 2.512983 -0.770922 3.075051  
 H 3.985680 -1.664654 3.471261  
 H 4.786768 -3.248643 1.452181  
 H 2.747938 1.457244 0.882528  
 H 2.531591 2.379965 -1.425442  
 H 3.358867 1.097370 -3.349539  
 N -0.357798 1.494762 -1.668088  
 C -2.159326 -1.158956 1.376040  
 O -2.162976 -0.887492 2.576758  
 C -0.876004 -1.327171 0.545227  
 C -1.067118 3.656173 -0.596666  
 C -3.265338 -1.654156 -0.800889  
 C -4.698325 -1.316620 -1.236205  
 C -5.532464 -1.648771 0.014053  
 C -4.636573 -1.216548 1.186741  
 C -2.174469 -0.846766 -1.513142  
 C 0.379959 -0.651770 1.144703  
 C 0.672125 0.528246 0.234648  
 C 0.071165 0.212965 -1.141978  
 C -0.476288 2.393858 -0.607098  
 C 0.145545 1.863390 0.548933  
 C 0.185985 2.619626 1.722579  
 C -0.400903 3.890530 1.740413  
 C -1.019562 4.397864 0.591460  
 N -1.045890 -0.707738 -0.783066  
 N -3.277668 -1.368299 0.646857  
 O -2.339530 -0.363627 -2.637887  
 H -1.077210 1.455556 -2.382079  
 H -0.710920 -2.408486 0.429422  
 H -1.555904 4.052243 -1.482637  
 H -3.059256 -2.723719 -0.968918  
 H -5.000693 -1.880290 -2.121499  
 H -4.761491 -0.250784 -1.478499  
 H -5.722245 -2.726957 0.065748  
 H -6.499070 -1.138266 0.025124  
 H -4.761781 -1.833040 2.081638  
 H -4.805484 -0.171172 1.473151  
 H 1.207346 -1.366087 1.146789



|   |           |           |           |
|---|-----------|-----------|-----------|
| H | 0.181184  | -0.351989 | 2.176408  |
| H | 0.743163  | -0.291778 | -1.842301 |
| H | 0.655124  | 2.219821  | 2.618542  |
| H | -0.380090 | 4.483189  | 2.650543  |
| H | -1.476373 | 5.383781  | 0.618164  |
| H | 4.071011  | 0.051272  | 3.050982  |

Figure S23B Radical C4 Product

O 2

|   |           |           |           |
|---|-----------|-----------|-----------|
| N | 0.429591  | 1.847117  | -1.472722 |
| C | -2.415722 | -0.558557 | 1.366240  |
| O | -2.556133 | -0.519859 | 2.589808  |
| C | -1.036369 | -0.633979 | 0.712787  |
| C | 0.959831  | 4.131102  | -0.579543 |
| C | -3.311789 | -0.588914 | -0.969665 |
| C | -4.609809 | 0.071985  | -1.454506 |
| C | -5.633458 | -0.379319 | -0.397447 |
| C | -4.844692 | -0.368508 | 0.925188  |
| C | -2.026912 | 0.067444  | -1.469099 |
| C | 0.065421  | 0.081498  | 1.502320  |
| C | 1.114058  | 0.552701  | 0.448042  |
| C | 0.359624  | 0.504398  | -0.931188 |
| C | 0.895394  | 2.736861  | -0.512551 |
| C | 1.392779  | 2.042567  | 0.604859  |
| C | 1.973186  | 2.736980  | 1.658052  |
| C | 2.056489  | 4.136882  | 1.598651  |
| C | 1.546913  | 4.818097  | 0.489617  |
| N | -1.004338 | 0.051684  | -0.586415 |
| N | -3.447917 | -0.544599 | 0.495228  |
| O | -1.948271 | 0.555433  | -2.600695 |
| H | -0.272844 | 2.105200  | -2.153858 |
| H | -0.780719 | -1.696406 | 0.578690  |
| H | 0.568745  | 4.666870  | -1.440142 |
| H | -3.284237 | -1.637620 | -1.309176 |
| H | -4.869931 | -0.232050 | -2.470414 |
| H | -4.490828 | 1.160988  | -1.445471 |
| H | -5.978583 | -1.395307 | -0.620109 |
| H | -6.512517 | 0.269025  | -0.355217 |
| H | -5.140368 | -1.168554 | 1.610655  |
| H | -4.940779 | 0.582463  | 1.462020  |
| H | 0.497702  | -0.551977 | 2.273595  |
| H | -0.369058 | 0.948983  | 2.004822  |
| H | 0.790957  | -0.213523 | -1.634662 |
| H | 2.353011  | 2.205306  | 2.527855  |
| H | 2.510188  | 4.688718  | 2.416725  |
| H | 1.605630  | 5.902985  | 0.451149  |
| N | 2.237110  | -3.722913 | -0.951601 |
| C | 3.197737  | -1.704071 | -2.077442 |
| C | 1.481124  | -2.842750 | 2.554984  |
| C | 1.812794  | -2.863470 | 1.085847  |
| C | 1.821338  | -4.023461 | 0.319736  |
| C | 2.538940  | -2.379789 | -1.026546 |
| C | 2.239320  | -1.803624 | 0.226398  |
| C | 2.450248  | -0.319516 | 0.441137  |
| C | 3.378898  | 0.244682  | -0.615751 |

|   |          |           |           |
|---|----------|-----------|-----------|
| C | 3.651610 | -0.390425 | -1.800823 |
| H | 2.408747 | -4.397622 | -1.682658 |
| H | 3.429284 | -2.199806 | -3.014666 |
| H | 0.422213 | -2.637864 | 2.757524  |
| H | 1.708829 | -3.812705 | 3.010419  |
| H | 1.572271 | -5.037227 | 0.600879  |
| H | 2.887779 | -0.148904 | 1.437860  |
| H | 3.754970 | 1.248708  | -0.446791 |
| H | 4.254678 | 0.120049  | -2.548351 |
| H | 2.067251 | -2.086215 | 3.089210  |

Figure S23B Radical C5 TS

O 2

|   |           |           |           |
|---|-----------|-----------|-----------|
| N | -0.101160 | 1.075050  | -1.595294 |
| C | -2.634826 | -0.841903 | 1.480686  |
| O | -3.027726 | -0.244309 | 2.482553  |
| C | -1.148922 | -1.052269 | 1.143191  |
| C | -1.143840 | 3.359616  | -1.466511 |
| C | -2.974536 | -2.090830 | -0.647401 |
| C | -4.215547 | -2.114021 | -1.550507 |
| C | -5.379202 | -2.195177 | -0.545996 |
| C | -4.921748 | -1.313823 | 0.627976  |
| C | -1.762490 | -1.364260 | -1.240176 |
| C | -0.179067 | -0.064729 | 1.833040  |
| C | 0.365737  | 0.814962  | 0.715844  |
| C | 0.206899  | 0.056678  | -0.608475 |
| C | -0.541743 | 2.221640  | -0.932756 |
| C | -0.260862 | 2.120049  | 0.450754  |
| C | -0.573972 | 3.181622  | 1.301847  |
| C | -1.173034 | 4.331763  | 0.772882  |
| C | -1.453912 | 4.413656  | -0.595887 |
| N | -0.925180 | -0.865815 | -0.303800 |
| N | -3.456099 | -1.409659 | 0.570012  |
| O | -1.594514 | -1.242881 | -2.457900 |
| H | -0.584483 | 0.747419  | -2.424483 |
| H | -0.903387 | -2.087792 | 1.422180  |
| H | -1.371981 | 3.426689  | -2.526829 |
| H | -2.664056 | -3.119299 | -0.401385 |
| H | -4.193147 | -2.947985 | -2.255453 |
| H | -4.259859 | -1.185688 | -2.129262 |
| H | -5.513833 | -3.228780 | -0.207261 |
| H | -6.328048 | -1.855970 | -0.969881 |
| H | -5.287602 | -1.657666 | 1.599832  |
| H | -5.229233 | -0.268010 | 0.504837  |
| H | 0.615116  | -0.628748 | 2.329375  |
| H | -0.714090 | 0.509146  | 2.593439  |
| H | 1.075180  | -0.535146 | -0.914242 |
| H | -0.369075 | 3.111510  | 2.367662  |
| H | -1.425709 | 5.160453  | 1.428234  |
| H | -1.925214 | 5.308032  | -0.995249 |
| N | 4.964346  | -0.875054 | -1.497722 |
| C | 3.665182  | 1.247005  | -1.033154 |
| C | 4.468458  | -3.085458 | 1.449847  |
| C | 4.499768  | -2.018875 | 0.396870  |
| C | 5.184403  | -2.047829 | -0.792547 |

|   |          |           |           |
|---|----------|-----------|-----------|
| C | 4.128358 | -0.061665 | -0.772783 |
| C | 3.803362 | -0.750726 | 0.431810  |
| C | 2.982992 | -0.127564 | 1.378388  |
| C | 2.357267 | 1.128773  | 1.069481  |
| C | 2.833059 | 1.835002  | -0.111928 |
| H | 5.361869 | -0.656211 | -2.398983 |
| H | 3.975205 | 1.780143  | -1.928220 |
| H | 3.445220 | -3.433148 | 1.644847  |
| H | 5.063246 | -3.954468 | 1.149868  |
| H | 5.818102 | -2.821139 | -1.205153 |
| H | 2.800044 | -0.600818 | 2.338799  |
| H | 2.094523 | 1.756385  | 1.920948  |
| H | 2.467255 | 2.841954  | -0.287431 |
| H | 4.867837 | -2.724811 | 2.407226  |

Figure S23B Radical C5 Product

0 2

|   |           |           |           |
|---|-----------|-----------|-----------|
| N | -0.119646 | 1.561815  | -1.593199 |
| C | -2.566201 | -0.986770 | 1.471354  |
| O | -2.933168 | -0.710083 | 2.613940  |
| C | -1.125206 | -0.772092 | 1.000120  |
| C | -0.637102 | 3.996132  | -1.256340 |
| C | -2.977170 | -1.818510 | -0.850751 |
| C | -4.302269 | -1.755607 | -1.623986 |
| C | -5.323195 | -2.264699 | -0.591097 |
| C | -4.828200 | -1.685967 | 0.746572  |
| C | -1.883920 | -0.887723 | -1.371243 |
| C | -0.394923 | 0.368412  | 1.723824  |
| C | 0.544111  | 1.032546  | 0.665291  |
| C | 0.121809  | 0.429676  | -0.719717 |
| C | -0.223348 | 2.728643  | -0.839826 |
| C | 0.217889  | 2.507042  | 0.476507  |
| C | 0.266436  | 3.557694  | 1.383937  |
| C | -0.135379 | 4.838958  | 0.976396  |
| C | -0.585870 | 5.045234  | -0.330731 |
| N | -1.079422 | -0.373706 | -0.413784 |
| N | -3.383874 | -1.504345 | 0.528862  |
| O | -1.757492 | -0.647443 | -2.575662 |
| H | -0.724940 | 1.392185  | -2.387333 |
| H | -0.579287 | -1.719172 | 1.134956  |
| H | -0.987019 | 4.163551  | -2.271307 |
| H | -2.571036 | -2.842574 | -0.895829 |
| H | -4.272245 | -2.352491 | -2.537757 |
| H | -4.512438 | -0.717494 | -1.903564 |
| H | -5.306588 | -3.359902 | -0.555162 |
| H | -6.346269 | -1.954030 | -0.818353 |
| H | -5.008144 | -2.348846 | 1.598187  |
| H | -5.285138 | -0.716118 | 0.976168  |
| H | 0.149428  | 0.000561  | 2.596088  |
| H | -1.129246 | 1.091080  | 2.085058  |
| H | 0.881610  | -0.231545 | -1.148905 |
| H | 0.601286  | 3.390224  | 2.405337  |
| H | -0.102490 | 5.666817  | 1.678685  |
| H | -0.904798 | 6.037662  | -0.639278 |
| N | 4.877130  | -1.518144 | -1.253233 |

|   |          |           |           |
|---|----------|-----------|-----------|
| C | 3.870665 | 0.770679  | -0.813812 |
| C | 3.307284 | -3.857672 | 1.168853  |
| C | 3.775887 | -2.723282 | 0.309042  |
| C | 4.717496 | -2.773547 | -0.690004 |
| C | 4.036271 | -0.631718 | -0.626503 |
| C | 3.315358 | -1.349403 | 0.368499  |
| C | 2.391184 | -0.693061 | 1.177647  |
| C | 2.080935 | 0.773358  | 0.984825  |
| C | 2.968760 | 1.437387  | -0.047111 |
| H | 5.511997 | -1.295703 | -2.005333 |
| H | 4.471528 | 1.300573  | -1.549658 |
| H | 2.226988 | -4.027615 | 1.064732  |
| H | 3.816646 | -4.790674 | 0.905935  |
| H | 5.294901 | -3.612757 | -1.053355 |
| H | 1.888266 | -1.229156 | 1.977190  |
| H | 2.224874 | 1.299173  | 1.948590  |
| H | 2.845495 | 2.508363  | -0.176231 |
| H | 3.494781 | -3.665491 | 2.233899  |

Figure S23B Radical C6 TS

0 2

|   |           |           |           |
|---|-----------|-----------|-----------|
| N | 0.265708  | 0.489845  | -1.431330 |
| C | -3.102061 | -0.299133 | 1.399508  |
| O | -3.569103 | 0.553118  | 2.155126  |
| C | -1.626946 | -0.733673 | 1.418794  |
| C | -0.303932 | 2.861026  | -2.044520 |
| C | -3.256682 | -1.963198 | -0.448991 |
| C | -4.309087 | -2.047212 | -1.563253 |
| C | -5.628170 | -1.769166 | -0.820289 |
| C | -5.252241 | -0.703634 | 0.222744  |
| C | -1.859650 | -1.542618 | -0.916885 |
| C | -0.658815 | 0.290992  | 2.059553  |
| C | 0.237476  | 0.763580  | 0.922416  |
| C | 0.185109  | -0.276263 | -0.201179 |
| C | -0.049512 | 1.820228  | -1.152825 |
| C | -0.055024 | 2.034553  | 0.246374  |
| C | -0.303496 | 3.312377  | 0.751533  |
| C | -0.553996 | 4.364950  | -0.137298 |
| C | -0.554612 | 4.135698  | -1.518381 |
| N | -1.135600 | -0.922788 | 0.040417  |
| N | -3.829957 | -0.971780 | 0.481196  |
| O | -1.458994 | -1.748919 | -2.066965 |
| H | -0.111076 | 0.036184  | -2.256286 |
| H | -1.583391 | -1.690948 | 1.959163  |
| H | -0.314333 | 2.688517  | -3.117350 |
| H | -3.161243 | -2.938052 | 0.056518  |
| H | -4.292303 | -3.014701 | -2.069735 |
| H | -4.108421 | -1.272667 | -2.310731 |
| H | -5.976438 | -2.678506 | -0.317294 |
| H | -6.425347 | -1.429515 | -1.486781 |
| H | -5.828344 | -0.778003 | 1.149628  |
| H | -5.371031 | 0.315547  | -0.165134 |
| H | -0.094538 | -0.195297 | 2.859205  |
| H | -1.231016 | 1.109055  | 2.503659  |
| H | 0.967053  | -1.041636 | -0.163663 |

|   |           |           |           |
|---|-----------|-----------|-----------|
| H | -0.316232 | 3.486458  | 1.825023  |
| H | -0.753941 | 5.361395  | 0.246319  |
| H | -0.756964 | 4.958333  | -2.199461 |
| N | 4.612971  | 0.341156  | -1.222571 |
| C | 3.001693  | 1.230941  | 0.487554  |
| C | 5.364913  | -3.165980 | -0.245745 |
| C | 4.885589  | -1.753666 | -0.409610 |
| C | 5.248712  | -0.871348 | -1.406146 |
| C | 3.807945  | 0.267939  | -0.101945 |
| C | 3.969451  | -1.046907 | 0.435380  |
| C | 3.288990  | -1.369186 | 1.637875  |
| C | 2.470190  | -0.435282 | 2.228870  |
| C | 2.195451  | 0.850824  | 1.614223  |
| H | 4.686095  | 1.135361  | -1.840357 |
| H | 2.917798  | 2.229792  | 0.070476  |
| H | 4.533512  | -3.882529 | -0.266057 |
| H | 6.059179  | -3.441529 | -1.046287 |
| H | 5.921990  | -1.016140 | -2.240212 |
| H | 3.444542  | -2.336684 | 2.109677  |
| H | 1.995766  | -0.670620 | 3.177130  |
| H | 1.897289  | 1.653397  | 2.287298  |
| H | 5.886538  | -3.310882 | 0.709442  |

Figure S23B Radical C6 Product

0 2

|   |           |           |           |
|---|-----------|-----------|-----------|
| N | 0.098901  | 1.051300  | -1.574953 |
| C | -3.065573 | -0.584440 | 1.445621  |
| O | -3.536363 | -0.054982 | 2.452857  |
| C | -1.558598 | -0.638766 | 1.176721  |
| C | -0.102977 | 3.550690  | -1.712833 |
| C | -3.278238 | -1.784768 | -0.736549 |
| C | -4.466217 | -1.720217 | -1.707018 |
| C | -5.677065 | -1.903360 | -0.774946 |
| C | -5.288394 | -1.140623 | 0.504459  |
| C | -2.005637 | -1.099597 | -1.230571 |
| C | -0.767619 | 0.515645  | 1.809384  |
| C | 0.387181  | 0.857149  | 0.812919  |
| C | 0.063664  | 0.071998  | -0.505960 |
| C | 0.068491  | 2.337354  | -1.041991 |
| C | 0.303493  | 2.303019  | 0.343569  |
| C | 0.386173  | 3.484933  | 1.068556  |
| C | 0.226188  | 4.711746  | 0.406382  |
| C | -0.020450 | 4.734052  | -0.969459 |
| N | -1.268575 | -0.515932 | -0.258831 |
| N | -3.816917 | -1.169769 | 0.487644  |
| O | -1.689917 | -1.100503 | -2.424007 |
| H | -0.416806 | 0.815927  | -2.414236 |
| H | -1.184677 | -1.605931 | 1.548713  |
| H | -0.293906 | 3.575357  | -2.782212 |
| H | -3.016797 | -2.837888 | -0.540819 |
| H | -4.398846 | -2.480233 | -2.488047 |
| H | -4.489185 | -0.737588 | -2.190666 |
| H | -5.819775 | -2.966234 | -0.549416 |
| H | -6.606690 | -1.527118 | -1.209823 |
| H | -5.671148 | -1.604733 | 1.418309  |

|   |           |           |           |
|---|-----------|-----------|-----------|
| H | -5.631258 | -0.099353 | 0.489796  |
| H | -0.401506 | 0.248634  | 2.803109  |
| H | -1.427869 | 1.376228  | 1.933279  |
| H | 0.770914  | -0.739261 | -0.706337 |
| H | 0.561846  | 3.463945  | 2.141964  |
| H | 0.287716  | 5.641520  | 0.964383  |
| H | -0.152437 | 5.686520  | -1.476646 |
| N | 4.827437  | -0.008359 | -0.944487 |
| C | 2.918302  | 0.852849  | 0.423305  |
| C | 5.141064  | -3.633303 | -0.185239 |
| C | 4.788338  | -2.179008 | -0.302936 |
| C | 5.424120  | -1.244193 | -1.105212 |
| C | 3.781910  | -0.114483 | -0.040617 |
| C | 3.749720  | -1.484223 | 0.376989  |
| C | 2.773378  | -1.867126 | 1.354234  |
| C | 1.887564  | -0.960743 | 1.840349  |
| C | 1.818897  | 0.484585  | 1.389363  |
| H | 5.088543  | 0.832082  | -1.437509 |
| H | 2.986814  | 1.882100  | 0.085806  |
| H | 4.306991  | -4.280063 | -0.486891 |
| H | 5.998766  | -3.882851 | -0.818355 |
| H | 6.260925  | -1.369627 | -1.778436 |
| H | 2.758423  | -2.890319 | 1.724470  |
| H | 1.185055  | -1.272397 | 2.608673  |
| H | 1.903544  | 1.126221  | 2.287369  |
| H | 5.399407  | -3.906765 | 0.846009  |

Figure S23B Radical C7 TS

0 2

|   |           |           |           |
|---|-----------|-----------|-----------|
| N | 0.386068  | 0.191715  | -1.353244 |
| C | -3.155271 | -0.096339 | 1.348101  |
| O | -3.382903 | 0.697709  | 2.260983  |
| C | -1.871220 | -0.937647 | 1.258417  |
| C | 0.545559  | 2.693855  | -1.518248 |
| C | -3.718300 | -1.264691 | -0.781020 |
| C | -4.700371 | -0.816118 | -1.872342 |
| C | -5.911273 | -0.312555 | -1.066863 |
| C | -5.285908 | 0.370975  | 0.160883  |
| C | -2.241739 | -1.198831 | -1.183830 |
| C | -0.672352 | -0.371159 | 2.058354  |
| C | 0.348614  | 0.039240  | 1.008488  |
| C | 0.051977  | -0.728508 | -0.282873 |
| C | 0.452514  | 1.482184  | -0.835397 |
| C | 0.454896  | 1.435447  | 0.581617  |
| C | 0.571753  | 2.620238  | 1.315549  |
| C | 0.680576  | 3.839722  | 0.635385  |
| C | 0.664244  | 3.869736  | -0.765316 |
| N | -1.404904 | -1.009076 | -0.139889 |
| N | -4.011812 | -0.342560 | 0.332770  |
| O | -1.874395 | -1.297701 | -2.358773 |
| H | -0.058778 | 0.014665  | -2.246798 |
| H | -2.124534 | -1.947175 | 1.614073  |
| H | 0.527980  | 2.726275  | -2.604102 |
| H | -3.938046 | -2.300766 | -0.476181 |
| H | -4.944901 | -1.626942 | -2.561921 |

|   |           |           |           |
|---|-----------|-----------|-----------|
| H | -4.250300 | -0.004208 | -2.452854 |
| H | -6.531190 | -1.158601 | -0.748981 |
| H | -6.545317 | 0.370099  | -1.638681 |
| H | -5.895747 | 0.285297  | 1.064977  |
| H | -5.091386 | 1.436504  | -0.012380 |
| H | -0.287220 | -1.143139 | 2.730313  |
| H | -1.003585 | 0.471491  | 2.670054  |
| H | 0.588750  | -1.675937 | -0.396137 |
| H | 0.564379  | 2.596983  | 2.402858  |
| H | 0.767270  | 4.766195  | 1.195729  |
| H | 0.740351  | 4.822866  | -1.282063 |
| N | 3.611321  | 1.071033  | 0.338382  |
| C | 2.235848  | -0.545954 | 1.722043  |
| C | 5.582662  | -0.930910 | -2.090340 |
| C | 4.686470  | -0.368282 | -1.027344 |
| C | 4.502335  | 0.956822  | -0.716133 |
| C | 3.193768  | -0.177239 | 0.717077  |
| C | 3.853323  | -1.114263 | -0.114565 |
| C | 3.640290  | -2.493985 | 0.096675  |
| C | 2.805008  | -2.889492 | 1.149947  |
| C | 2.174155  | -1.957958 | 1.976037  |
| H | 3.242430  | 1.939949  | 0.697934  |
| H | 2.093083  | 0.127752  | 2.565023  |
| H | 5.021293  | -1.527583 | -2.821324 |
| H | 6.093569  | -0.132025 | -2.637923 |
| H | 4.945505  | 1.840011  | -1.155455 |
| H | 4.138162  | -3.235562 | -0.521835 |
| H | 2.674044  | -3.949330 | 1.354639  |
| H | 1.588711  | -2.311218 | 2.819861  |
| H | 6.353788  | -1.589169 | -1.668442 |

Figure S23B Radical C7 Product

0 2

|   |           |           |           |
|---|-----------|-----------|-----------|
| N | -0.362704 | 0.719051  | 1.495497  |
| C | 3.201568  | -0.191986 | -1.382528 |
| O | 3.543373  | 0.383114  | -2.416451 |
| C | 1.754289  | -0.622229 | -1.126212 |
| C | -0.867000 | 3.177414  | 1.488855  |
| C | 3.663799  | -1.163535 | 0.874552  |
| C | 4.766879  | -0.727454 | 1.849619  |
| C | 6.007810  | -0.642745 | 0.943242  |
| C | 5.466995  | -0.090573 | -0.387866 |
| C | 2.243270  | -0.810785 | 1.310440  |
| C | 0.708820  | 0.252182  | -1.833110 |
| C | -0.526245 | 0.320983  | -0.877039 |
| C | -0.041465 | -0.275710 | 0.491478  |
| C | -0.672575 | 1.930152  | 0.889578  |
| C | -0.852043 | 1.757400  | -0.495193 |
| C | -1.243049 | 2.828847  | -1.290417 |
| C | -1.457708 | 4.083574  | -0.697873 |
| C | -1.263088 | 4.246666  | 0.677283  |
| N | 1.404759  | -0.500098 | 0.295569  |
| N | 4.054412  | -0.504466 | -0.382832 |
| O | 1.905802  | -0.825772 | 2.497499  |
| H | 0.157343  | 0.672499  | 2.362990  |

|   |           |           |           |
|---|-----------|-----------|-----------|
| H | 1.651685  | -1.671791 | -1.443680 |
| H | -0.720895 | 3.311786  | 2.556904  |
| H | 3.693599  | -2.258234 | 0.746783  |
| H | 4.880726  | -1.427762 | 2.679516  |
| H | 4.518201  | 0.254884  | 2.265795  |
| H | 6.430140  | -1.642395 | 0.790885  |
| H | 6.794215  | -0.008465 | 1.360424  |
| H | 5.982040  | -0.493837 | -1.264833 |
| H | 5.524902  | 1.003018  | -0.440344 |
| H | 0.457222  | -0.145135 | -2.818855 |
| H | 1.123314  | 1.250401  | -1.986550 |
| H | -0.513643 | -1.232882 | 0.735495  |
| H | -1.373449 | 2.703287  | -2.363136 |
| H | -1.764204 | 4.926922  | -1.309454 |
| H | -1.420976 | 5.222280  | 1.129791  |
| N | -3.683986 | 0.624760  | -0.137445 |
| C | -1.774837 | -0.464792 | -1.467583 |
| C | -5.652408 | -2.021817 | 1.553105  |
| C | -4.699766 | -1.157507 | 0.780485  |
| C | -4.721926 | 0.213803  | 0.679632  |
| C | -2.972690 | -0.463597 | -0.563089 |
| C | -3.584898 | -1.602708 | -0.018820 |
| C | -3.101294 | -2.901509 | -0.345515 |
| C | -2.032672 | -2.998430 | -1.263092 |
| C | -1.423379 | -1.895110 | -1.818288 |
| H | -3.443338 | 1.585701  | -0.335334 |
| H | -2.012358 | 0.082394  | -2.398127 |
| H | -5.136082 | -2.614338 | 2.320025  |
| H | -6.411282 | -1.415688 | 2.059158  |
| H | -5.393928 | 0.936542  | 1.121045  |
| H | -3.560672 | -3.792950 | 0.069669  |
| H | -1.687158 | -3.986279 | -1.561264 |
| H | -0.637467 | -2.042771 | -2.552896 |
| H | -6.177008 | -2.733859 | 0.902216  |

Figure S23D Cation C2 TS

1 1

|   |          |           |           |
|---|----------|-----------|-----------|
| N | 2.499976 | -0.990244 | 1.891234  |
| C | 3.435639 | -3.004202 | 0.701729  |
| C | 3.577696 | 1.963163  | -0.087487 |
| C | 3.256661 | 0.622452  | 0.476312  |
| C | 2.484858 | 0.372334  | 1.636940  |
| C | 3.183815 | -1.638333 | 0.889507  |
| C | 3.662650 | -0.646611 | -0.020789 |
| C | 4.413694 | -1.049876 | -1.150710 |
| C | 4.665976 | -2.395706 | -1.332210 |
| C | 4.180834 | -3.360826 | -0.412445 |
| H | 2.148343 | -1.428841 | 2.730211  |
| H | 3.069611 | -3.748908 | 1.401218  |
| H | 2.786096 | 2.314671  | -0.766134 |
| H | 3.682843 | 2.716738  | 0.698181  |
| H | 2.282227 | 1.067139  | 2.440126  |
| H | 4.786431 | -0.313016 | -1.855637 |
| H | 5.243533 | -2.727758 | -2.189123 |
| H | 4.401283 | -4.409897 | -0.586235 |

|   |           |           |           |
|---|-----------|-----------|-----------|
| H | 4.506021  | 1.930707  | -0.665024 |
| N | 0.339368  | 0.613424  | -1.506113 |
| C | -2.957120 | -0.227594 | 1.460535  |
| O | -3.345914 | 0.571139  | 2.310807  |
| C | -1.490321 | -0.680302 | 1.356446  |
| C | 0.188921  | 3.057604  | -2.004183 |
| C | -3.261675 | -1.731434 | -0.509760 |
| C | -4.377587 | -1.687293 | -1.563881 |
| C | -5.642378 | -1.454917 | -0.718666 |
| C | -5.181472 | -0.496940 | 0.392063  |
| C | -1.880927 | -1.322386 | -1.025795 |
| C | -0.476265 | 0.300241  | 2.003848  |
| C | 0.356178  | 0.773043  | 0.828151  |
| C | 0.238298  | -0.215373 | -0.326998 |
| C | 0.283667  | 1.929148  | -1.169915 |
| C | 0.299375  | 2.070341  | 0.258264  |
| C | 0.197518  | 3.353005  | 0.844467  |
| C | 0.096952  | 4.453831  | 0.018286  |
| C | 0.095324  | 4.297870  | -1.392938 |
| N | -1.096746 | -0.764613 | -0.065130 |
| N | -3.748167 | -0.807273 | 0.534380  |
| O | -1.520689 | -1.473789 | -2.190846 |
| H | 0.125153  | 0.232310  | -2.418643 |
| H | -1.412095 | -1.670367 | 1.825868  |
| H | 0.173704  | 2.955172  | -3.083959 |
| H | -3.171765 | -2.748738 | -0.096719 |
| H | -4.413595 | -2.603043 | -2.157298 |
| H | -4.201745 | -0.848667 | -2.245604 |
| H | -5.982819 | -2.400018 | -0.281454 |
| H | -6.467575 | -1.038923 | -1.301773 |
| H | -5.698058 | -0.650937 | 1.343329  |
| H | -5.301059 | 0.555521  | 0.109117  |
| H | 0.102851  | -0.214479 | 2.771517  |
| H | -1.007979 | 1.125549  | 2.481909  |
| H | 0.988024  | -1.015051 | -0.349455 |
| H | 0.202489  | 3.462863  | 1.924597  |
| H | 0.017104  | 5.449191  | 0.441983  |
| H | 0.010927  | 5.183501  | -2.015901 |

Figure S23D Cation C2 Product

1 1

|   |          |           |           |
|---|----------|-----------|-----------|
| N | 2.554474 | -0.993042 | 1.452018  |
| C | 4.388018 | -2.482461 | 0.672844  |
| C | 3.089784 | 2.228897  | -0.414888 |
| C | 3.049797 | 0.848364  | 0.130171  |
| C | 2.068813 | 0.353374  | 1.168725  |
| C | 3.621427 | -1.296542 | 0.706688  |
| C | 3.953371 | -0.164193 | -0.130867 |
| C | 5.081263 | -0.240639 | -1.009408 |
| C | 5.808749 | -1.397695 | -1.033949 |
| C | 5.457697 | -2.506452 | -0.193212 |
| H | 2.158041 | -1.602516 | 2.154145  |
| H | 4.142860 | -3.329899 | 1.303178  |
| H | 2.250551 | 2.403755  | -1.098097 |
| H | 2.995072 | 2.969089  | 0.386605  |

|   |           |           |           |
|---|-----------|-----------|-----------|
| H | 2.179891  | 0.972384  | 2.070681  |
| H | 5.340179  | 0.601584  | -1.641696 |
| H | 6.666616  | -1.493142 | -1.690514 |
| H | 6.069373  | -3.402375 | -0.244115 |
| H | 4.020306  | 2.410129  | -0.956619 |
| N | 0.201303  | 0.498093  | -1.561376 |
| C | -2.862096 | -0.470295 | 1.470715  |
| O | -3.145377 | 0.297484  | 2.388906  |
| C | -1.447947 | -1.042775 | 1.260581  |
| C | -0.597631 | 2.884222  | -1.685506 |
| C | -3.365621 | -1.810403 | -0.567264 |
| C | -4.526508 | -1.635075 | -1.556591 |
| C | -5.730150 | -1.362993 | -0.636809 |
| C | -5.149118 | -0.500952 | 0.496242  |
| C | -1.989041 | -1.441996 | -1.125944 |
| C | -0.327222 | -0.240940 | 1.943590  |
| C | 0.530149  | 0.365805  | 0.800055  |
| C | 0.214994  | -0.471319 | -0.481314 |
| C | -0.156425 | 1.738016  | -1.020982 |
| C | 0.055982  | 1.743130  | 0.368491  |
| C | -0.160867 | 2.896898  | 1.113405  |
| C | -0.598835 | 4.053677  | 0.457157  |
| C | -0.814006 | 4.038301  | -0.926157 |
| N | -1.109714 | -1.041704 | -0.171504 |
| N | -3.740269 | -0.924423 | 0.552994  |
| O | -1.718038 | -1.492948 | -2.326384 |
| H | -0.262455 | 0.175547  | -2.405761 |
| H | -1.459641 | -2.074466 | 1.639507  |
| H | -0.768665 | 2.878818  | -2.757778 |
| H | -3.317807 | -2.854771 | -0.218824 |
| H | -4.656638 | -2.513045 | -2.192631 |
| H | -4.325135 | -0.775632 | -2.204207 |
| H | -6.115322 | -2.304923 | -0.230607 |
| H | -6.551152 | -0.861210 | -1.154987 |
| H | -5.633210 | -0.666059 | 1.462777  |
| H | -5.201891 | 0.570920  | 0.270966  |
| H | 0.251334  | -0.897688 | 2.596930  |
| H | -0.760742 | 0.537183  | 2.574921  |
| H | 0.926078  | -1.274185 | -0.693864 |
| H | -0.006529 | 2.905454  | 2.189538  |
| H | -0.780205 | 4.961182  | 1.024264  |
| H | -1.161599 | 4.939391  | -1.423547 |

Figure S23D Cation C3 TS

1 1

|   |           |           |           |
|---|-----------|-----------|-----------|
| N | 0.465649  | -0.138262 | -1.452311 |
| C | -3.020731 | 0.326576  | 1.356612  |
| O | -3.203100 | 1.312602  | 2.068231  |
| C | -1.734805 | -0.517213 | 1.417682  |
| C | 0.917941  | 2.188723  | -2.235191 |
| C | -3.657099 | -1.302943 | -0.423011 |
| C | -4.683985 | -1.118653 | -1.550182 |
| C | -5.862549 | -0.432496 | -0.836938 |
| C | -5.191757 | 0.519451  | 0.166591  |
| C | -2.200459 | -1.348306 | -0.888583 |

|   |           |           |           |
|---|-----------|-----------|-----------|
| C | -0.514906 | 0.228332  | 2.018432  |
| C | 0.464403  | 0.304445  | 0.859299  |
| C | 0.116246  | -0.753992 | -0.192986 |
| C | 0.719866  | 1.188696  | -1.270322 |
| C | 0.721316  | 1.503274  | 0.125782  |
| C | 0.871360  | 2.844648  | 0.544105  |
| C | 1.060790  | 3.826429  | -0.411374 |
| C | 1.091250  | 3.490281  | -1.786578 |
| N | -1.326166 | -0.899850 | 0.050486  |
| N | -3.908309 | -0.143382 | 0.456035  |
| O | -1.857636 | -1.743139 | -2.001353 |
| H | 0.131458  | -0.546035 | -2.316022 |
| H | -1.956116 | -1.417662 | 2.007000  |
| H | 0.915255  | 1.951418  | -3.293842 |
| H | -3.858636 | -2.237914 | 0.123981  |
| H | -4.952221 | -2.069050 | -2.015908 |
| H | -4.262654 | -0.469502 | -2.324727 |
| H | -6.465525 | -1.175771 | -0.303697 |
| H | -6.520796 | 0.099005  | -1.528595 |
| H | -5.763563 | 0.655743  | 1.088508  |
| H | -5.002445 | 1.510051  | -0.263478 |
| H | -0.128918 | -0.314982 | 2.881045  |
| H | -0.820462 | 1.220435  | 2.357250  |
| H | 0.616851  | -1.721997 | -0.092429 |
| H | 0.820990  | 3.100735  | 1.597491  |
| H | 1.174430  | 4.863099  | -0.112689 |
| H | 1.236255  | 4.281542  | -2.516506 |
| N | 2.577521  | -2.461500 | 1.181431  |
| C | 3.887169  | -2.340304 | -0.980407 |
| C | 2.722199  | 0.876824  | 2.671192  |
| C | 2.511641  | -0.255501 | 1.700420  |
| C | 2.170742  | -1.572405 | 2.100814  |
| C | 3.279159  | -1.813713 | 0.155697  |
| C | 3.286820  | -0.436714 | 0.469170  |
| C | 3.957051  | 0.450669  | -0.378850 |
| C | 4.581997  | -0.062780 | -1.516762 |
| C | 4.542659  | -1.435256 | -1.816167 |
| H | 2.405385  | -3.459031 | 1.228852  |
| H | 3.862553  | -3.402349 | -1.202848 |
| H | 2.698068  | 1.844330  | 2.163160  |
| H | 1.970723  | 0.880621  | 3.466324  |
| H | 1.648351  | -1.899309 | 2.989581  |
| H | 4.000646  | 1.512261  | -0.157387 |
| H | 5.112453  | 0.610051  | -2.183652 |
| H | 5.038022  | -1.801634 | -2.709910 |
| H | 3.707026  | 0.782766  | 3.143309  |

Figure S23D Cation C3 Product

1 1

|   |           |           |           |
|---|-----------|-----------|-----------|
| N | 0.408224  | 0.073579  | -1.522427 |
| C | -2.854963 | -0.160231 | 1.394091  |
| O | -2.947450 | 0.639026  | 2.324355  |
| C | -1.646641 | -1.096461 | 1.203386  |
| C | 0.167977  | 2.575367  | -1.580712 |
| C | -3.636092 | -1.281384 | -0.686362 |

|   |           |           |           |
|---|-----------|-----------|-----------|
| C | -4.683848 | -0.796182 | -1.698397 |
| C | -5.792396 | -0.214069 | -0.802799 |
| C | -5.028754 | 0.453764  | 0.352199  |
| C | -2.195324 | -1.276996 | -1.205047 |
| C | -0.373100 | -0.658629 | 1.942914  |
| C | 0.628587  | -0.200716 | 0.850406  |
| C | 0.162081  | -0.898565 | -0.475339 |
| C | 0.327620  | 1.345161  | -0.942956 |
| C | 0.468944  | 1.262655  | 0.453579  |
| C | 0.431641  | 2.417180  | 1.231186  |
| C | 0.277238  | 3.658790  | 0.601542  |
| C | 0.151405  | 3.728808  | -0.790044 |
| N | -1.270552 | -1.151827 | -0.217895 |
| N | -3.792486 | -0.339967 | 0.440849  |
| O | -1.912805 | -1.360959 | -2.401067 |
| H | -0.111757 | -0.101878 | -2.377361 |
| H | -1.957658 | -2.093882 | 1.545079  |
| H | 0.052760  | 2.634447  | -2.658907 |
| H | -3.872662 | -2.305143 | -0.354322 |
| H | -5.029841 | -1.604305 | -2.346227 |
| H | -4.243594 | -0.020490 | -2.333215 |
| H | -6.426825 | -1.019266 | -0.415907 |
| H | -6.434772 | 0.493062  | -1.333480 |
| H | -5.565007 | 0.426276  | 1.304710  |
| H | -4.780083 | 1.499417  | 0.134384  |
| H | 0.014316  | -1.494854 | 2.529826  |
| H | -0.614592 | 0.145234  | 2.641411  |
| H | 0.664440  | -1.843185 | -0.707420 |
| H | 0.497395  | 2.365827  | 2.314324  |
| H | 0.241478  | 4.565326  | 1.197410  |
| H | 0.024164  | 4.695768  | -1.268856 |
| N | 3.279584  | -2.442758 | 0.540731  |
| C | 4.888867  | -1.437774 | -1.126739 |
| C | 2.540973  | 0.089187  | 2.592622  |
| C | 2.140083  | -0.547603 | 1.227210  |
| C | 2.338375  | -2.033147 | 1.335847  |
| C | 3.846976  | -1.379906 | -0.211214 |
| C | 3.179343  | -0.207039 | 0.162023  |
| C | 3.598298  | 0.998508  | -0.391706 |
| C | 4.643688  | 0.974359  | -1.323651 |
| C | 5.276941  | -0.220747 | -1.690378 |
| H | 3.584511  | -3.412413 | 0.473612  |
| H | 5.378991  | -2.370786 | -1.384382 |
| H | 2.498669  | 1.176147  | 2.497745  |
| H | 1.869928  | -0.224864 | 3.395512  |
| H | 1.818307  | -2.727410 | 1.983821  |
| H | 3.130149  | 1.936965  | -0.118850 |
| H | 4.973606  | 1.907201  | -1.770033 |
| H | 6.085347  | -0.201801 | -2.413824 |
| H | 3.563858  | -0.189119 | 2.859873  |

Figure S23D Cation C4 TS

1 1

|   |          |           |           |
|---|----------|-----------|-----------|
| N | 4.298010 | -2.367940 | -0.688516 |
| C | 3.702047 | -0.471728 | -2.221449 |

|   |           |           |           |
|---|-----------|-----------|-----------|
| C | 3.637287  | -1.177807 | 2.764684  |
| C | 3.736452  | -1.404997 | 1.283685  |
| C | 4.283446  | -2.526713 | 0.665769  |
| C | 3.776986  | -1.129653 | -0.999540 |
| C | 3.394066  | -0.513970 | 0.228662  |
| C | 2.778545  | 0.781418  | 0.185041  |
| C | 2.811338  | 1.475802  | -1.070741 |
| C | 3.232684  | 0.856090  | -2.237761 |
| H | 4.676868  | -3.032490 | -1.349295 |
| H | 4.026271  | -0.953745 | -3.139256 |
| H | 2.614417  | -0.953466 | 3.086130  |
| H | 3.971405  | -2.061439 | 3.315923  |
| H | 4.681324  | -3.424527 | 1.118914  |
| H | 2.762441  | 1.371969  | 1.095564  |
| H | 2.457115  | 2.500233  | -1.105890 |
| H | 3.200367  | 1.395090  | -3.178497 |
| N | -0.281475 | 1.500890  | -1.621422 |
| C | -2.151410 | -1.171284 | 1.371974  |
| O | -2.167042 | -0.906769 | 2.572814  |
| C | -0.849374 | -1.330833 | 0.566313  |
| C | -1.013364 | 3.664088  | -0.593382 |
| C | -3.207514 | -1.642838 | -0.836442 |
| C | -4.635041 | -1.315598 | -1.298308 |
| C | -5.489627 | -1.666255 | -0.067181 |
| C | -4.624080 | -1.231463 | 1.126470  |
| C | -2.112700 | -0.817720 | -1.518607 |
| C | 0.387259  | -0.658168 | 1.210311  |
| C | 0.643383  | 0.535524  | 0.313311  |
| C | 0.120948  | 0.215207  | -1.093667 |
| C | -0.423678 | 2.393269  | -0.585881 |
| C | 0.144561  | 1.857133  | 0.604630  |
| C | 0.123874  | 2.601471  | 1.798227  |
| C | -0.459474 | 3.858361  | 1.789239  |
| C | -1.019478 | 4.377460  | 0.599617  |
| N | -0.996546 | -0.682987 | -0.754010 |
| N | -3.250271 | -1.369807 | 0.614741  |
| O | -2.239637 | -0.317039 | -2.634664 |
| H | -0.891608 | 1.506175  | -2.431173 |
| H | -0.669528 | -2.406609 | 0.437006  |
| H | -1.453632 | 4.072295  | -1.497233 |
| H | -2.984763 | -2.707397 | -1.011383 |
| H | -4.912349 | -1.876861 | -2.192932 |
| H | -4.705336 | -0.248784 | -1.533810 |
| H | -5.668683 | -2.746368 | -0.026562 |
| H | -6.460945 | -1.165539 | -0.073372 |
| H | -4.760494 | -1.853509 | 2.015213  |
| H | -4.805602 | -0.188482 | 1.412209  |
| H | 1.222869  | -1.358884 | 1.210022  |
| H | 0.164645  | -0.370105 | 2.239480  |
| H | 0.826279  | -0.283454 | -1.764244 |
| H | 0.554153  | 2.194952  | 2.708878  |
| H | -0.493068 | 4.449936  | 2.698044  |
| H | -1.474594 | 5.363491  | 0.619424  |
| H | 4.265045  | -0.333897 | 3.076264  |

### Figure S23D Cation C4 Product

|   |           |           |           |
|---|-----------|-----------|-----------|
| 1 | 1         |           |           |
| N | -0.182866 | 1.410408  | -1.593239 |
| C | -2.171310 | -1.147479 | 1.284026  |
| O | -2.217552 | -0.852837 | 2.477387  |
| C | -0.856208 | -1.408184 | 0.528025  |
| C | -1.279151 | 3.375353  | -0.458066 |
| C | -3.160174 | -1.643646 | -0.945902 |
| C | -4.552477 | -1.279286 | -1.479906 |
| C | -5.470461 | -1.542119 | -0.272495 |
| C | -4.635725 | -1.091128 | 0.937232  |
| C | -2.002859 | -0.886620 | -1.604510 |
| C | 0.404548  | -0.825887 | 1.184156  |
| C | 0.798439  | 0.397447  | 0.330407  |
| C | 0.227680  | 0.109735  | -1.096243 |
| C | -0.532405 | 2.196345  | -0.489489 |
| C | 0.042927  | 1.667546  | 0.679076  |
| C | -0.109367 | 2.321108  | 1.897820  |
| C | -0.856630 | 3.503234  | 1.942752  |
| C | -1.432733 | 4.017375  | 0.773893  |
| N | -0.904941 | -0.795233 | -0.809541 |
| N | -3.251060 | -1.310477 | 0.490554  |
| O | -2.076579 | -0.394022 | -2.731041 |
| H | -0.809540 | 1.376116  | -2.392315 |
| H | -0.757019 | -2.498779 | 0.432145  |
| H | -1.727391 | 3.779576  | -1.360752 |
| H | -2.974522 | -2.722758 | -1.068476 |
| H | -4.817957 | -1.865850 | -2.361981 |
| H | -4.567438 | -0.221498 | -1.761553 |
| H | -5.695005 | -2.611774 | -0.194460 |
| H | -6.419585 | -1.004535 | -0.339966 |
| H | -4.836011 | -1.666168 | 1.845495  |
| H | -4.784017 | -0.029615 | 1.169471  |
| H | 1.188474  | -1.580168 | 1.162550  |
| H | 0.200699  | -0.562538 | 2.224040  |
| H | 0.926097  | -0.367175 | -1.789098 |
| H | 0.329621  | 1.917156  | 2.806771  |
| H | -0.995829 | 4.019449  | 2.887448  |
| H | -2.015023 | 4.933262  | 0.822954  |
| N | 4.788363  | -1.875832 | -0.746704 |
| C | 4.120484  | 0.172593  | -1.991158 |
| C | 3.321271  | -1.578913 | 2.637634  |
| C | 3.686650  | -1.444832 | 1.186448  |
| C | 4.594253  | -2.295230 | 0.515444  |
| C | 4.046945  | -0.721827 | -0.948790 |
| C | 3.309941  | -0.471885 | 0.251853  |
| C | 2.402784  | 0.714959  | 0.319814  |
| C | 2.643956  | 1.683686  | -0.797651 |
| C | 3.423966  | 1.411815  | -1.883103 |
| H | 5.429374  | -2.291651 | -1.410695 |
| H | 4.736324  | -0.031894 | -2.862620 |
| H | 2.602951  | -2.388307 | 2.810688  |
| H | 4.210732  | -1.799914 | 3.236338  |
| H | 5.116615  | -3.160867 | 0.900592  |
| H | 2.555121  | 1.231913  | 1.276855  |

|   |          |           |           |
|---|----------|-----------|-----------|
| H | 2.120910 | 2.630937  | -0.740153 |
| H | 3.523582 | 2.138830  | -2.681408 |
| H | 2.879350 | -0.655884 | 3.022261  |

Figure S23D Cation C5 TS

1 1

|   |           |           |           |
|---|-----------|-----------|-----------|
| N | 0.034211  | 1.419583  | -1.553938 |
| C | -2.595557 | -0.899215 | 1.486292  |
| O | -2.997112 | -0.515287 | 2.583426  |
| C | -1.115574 | -0.824743 | 1.084020  |
| C | -0.469252 | 3.864005  | -1.423320 |
| C | -2.917877 | -1.845496 | -0.806772 |
| C | -4.194963 | -1.789239 | -1.658794 |
| C | -5.293459 | -2.173880 | -0.652290 |
| C | -4.851220 | -1.509459 | 0.662720  |
| C | -1.767698 | -0.984009 | -1.323921 |
| C | -0.314013 | 0.259816  | 1.846706  |
| C | 0.381383  | 1.049315  | 0.742640  |
| C | 0.205039  | 0.343735  | -0.606138 |
| C | -0.123085 | 2.607672  | -0.901368 |
| C | 0.104341  | 2.435434  | 0.497557  |
| C | -0.027144 | 3.527469  | 1.378249  |
| C | -0.365025 | 4.764652  | 0.859418  |
| C | -0.580616 | 4.921468  | -0.531523 |
| N | -0.996334 | -0.452549 | -0.338401 |
| N | -3.386165 | -1.420616 | 0.525506  |
| O | -1.559656 | -0.794446 | -2.520703 |
| H | -0.308117 | 1.217663  | -2.484368 |
| H | -0.667110 | -1.814715 | 1.250305  |
| H | -0.647885 | 3.998504  | -2.484960 |
| H | -2.545671 | -2.881761 | -0.759982 |
| H | -4.139812 | -2.457698 | -2.520147 |
| H | -4.342463 | -0.769124 | -2.029109 |
| H | -5.327410 | -3.262091 | -0.530179 |
| H | -6.286180 | -1.841188 | -0.965251 |
| H | -5.115199 | -2.088315 | 1.552114  |
| H | -5.265699 | -0.501714 | 0.781745  |
| H | 0.360629  | -0.192023 | 2.572253  |
| H | -0.998713 | 0.905981  | 2.400369  |
| H | 1.035039  | -0.305973 | -0.907057 |
| H | 0.139067  | 3.397478  | 2.443694  |
| H | -0.470222 | 5.621999  | 1.515655  |
| H | -0.849737 | 5.902322  | -0.912799 |
| N | 4.399680  | -1.598593 | -1.501512 |
| C | 3.701324  | 0.759485  | -0.995383 |
| C | 3.398306  | -3.706549 | 1.400610  |
| C | 3.688279  | -2.656290 | 0.372771  |
| C | 4.317682  | -2.819297 | -0.828589 |
| C | 3.832431  | -0.624353 | -0.752889 |
| C | 3.355274  | -1.247232 | 0.454646  |
| C | 2.747218  | -0.459375 | 1.416868  |
| C | 2.516148  | 0.921574  | 1.155725  |
| C | 3.066017  | 1.513964  | -0.037797 |
| H | 4.831063  | -1.468101 | -2.406814 |
| H | 4.093655  | 1.208688  | -1.902077 |

|   |          |           |           |
|---|----------|-----------|-----------|
| H | 2.322272 | -3.790053 | 1.597413  |
| H | 3.755477 | -4.686080 | 1.070177  |
| H | 4.725643 | -3.711899 | -1.281542 |
| H | 2.435817 | -0.890903 | 2.363296  |
| H | 2.342284 | 1.570889  | 2.008838  |
| H | 2.945236 | 2.581638  | -0.188259 |
| H | 3.884690 | -3.477151 | 2.356679  |

Figure S23D Cation C5 Product

1 1

|   |           |           |           |
|---|-----------|-----------|-----------|
| N | -0.103391 | 0.956113  | -1.625212 |
| C | -2.710496 | -0.836337 | 1.463792  |
| O | -2.995079 | -0.248235 | 2.505963  |
| C | -1.264673 | -1.175376 | 1.055788  |
| C | -1.213604 | 3.197802  | -1.315998 |
| C | -3.247293 | -1.936327 | -0.705668 |
| C | -4.514375 | -1.785633 | -1.559668 |
| C | -5.644248 | -1.805854 | -0.514655 |
| C | -5.061392 | -1.035641 | 0.681373  |
| C | -1.989766 | -1.308456 | -1.312004 |
| C | -0.186857 | -0.332480 | 1.760244  |
| C | 0.470547  | 0.536266  | 0.657624  |
| C | 0.131917  | -0.145293 | -0.708097 |
| C | -0.562189 | 2.045973  | -0.873506 |
| C | -0.222050 | 1.880673  | 0.479202  |
| C | -0.514633 | 2.873286  | 1.408089  |
| C | -1.165336 | 4.035669  | 0.975964  |
| C | -1.508666 | 4.187247  | -0.372316 |
| N | -1.077159 | -0.925599 | -0.382897 |
| N | -3.613900 | -1.274075 | 0.562188  |
| O | -1.836515 | -1.156985 | -2.525045 |
| H | -0.609511 | 0.694943  | -2.466453 |
| H | -1.111800 | -2.242722 | 1.269899  |
| H | -1.484723 | 3.321952  | -2.360231 |
| H | -3.036808 | -3.002569 | -0.523489 |
| H | -4.599819 | -2.577808 | -2.306402 |
| H | -4.485120 | -0.826724 | -2.087262 |
| H | -5.869537 | -2.837504 | -0.221985 |
| H | -6.567889 | -1.353141 | -0.883857 |
| H | -5.425435 | -1.391087 | 1.649335  |
| H | -5.263120 | 0.040543  | 0.619489  |
| H | 0.526401  | -0.988806 | 2.260675  |
| H | -0.651165 | 0.285791  | 2.531208  |
| H | 0.910502  | -0.808724 | -1.096428 |
| H | -0.256716 | 2.750453  | 2.457331  |
| H | -1.409552 | 4.816104  | 1.689829  |
| H | -2.019649 | 5.089693  | -0.696356 |
| N | 5.589065  | -0.220951 | -1.100628 |
| C | 3.794289  | 1.486289  | -0.790491 |
| C | 4.803174  | -3.167643 | 1.044612  |
| C | 4.900888  | -1.885739 | 0.280477  |
| C | 5.868913  | -1.508463 | -0.594202 |
| C | 4.459141  | 0.250338  | -0.577398 |
| C | 3.956516  | -0.771852 | 0.324653  |
| C | 2.800321  | -0.550817 | 1.002076  |



|   |          |           |           |
|---|----------|-----------|-----------|
| C | 2.044199 | 0.725599  | 0.855390  |
| C | 2.634162 | 1.697850  | -0.117362 |
| H | 6.174978 | 0.268690  | -1.767181 |
| H | 4.199652 | 2.224283  | -1.474893 |
| H | 3.881363 | -3.707361 | 0.797459  |
| H | 5.649247 | -3.821165 | 0.817125  |
| H | 6.756477 | -2.028379 | -0.924340 |
| H | 2.424275 | -1.300720 | 1.690102  |
| H | 2.113034 | 1.216668  | 1.846835  |
| H | 2.098671 | 2.629977  | -0.255181 |
| H | 4.795755 | -2.985517 | 2.125744  |

Figure S23D Cation C6 TS

1 1

|   |           |           |           |
|---|-----------|-----------|-----------|
| N | 0.282788  | 0.644691  | -1.446866 |
| C | -3.035039 | -0.389201 | 1.421128  |
| O | -3.531108 | 0.407198  | 2.215769  |
| C | -1.531379 | -0.715268 | 1.398055  |
| C | -0.269550 | 3.011137  | -2.043863 |
| C | -3.112645 | -1.999073 | -0.483448 |
| C | -4.183456 | -2.123295 | -1.577146 |
| C | -5.499021 | -1.963915 | -0.793860 |
| C | -5.175577 | -0.904735 | 0.271996  |
| C | -1.759754 | -1.474374 | -0.968661 |
| C | -0.636728 | 0.371172  | 2.049927  |
| C | 0.190495  | 0.889011  | 0.886202  |
| C | 0.220127  | -0.147416 | -0.237137 |
| C | -0.018186 | 1.949740  | -1.162944 |
| C | -0.057927 | 2.147597  | 0.250339  |
| C | -0.353364 | 3.418641  | 0.782611  |
| C | -0.596875 | 4.464374  | -0.090186 |
| C | -0.552690 | 4.252805  | -1.489209 |
| N | -1.066862 | -0.816354 | -0.001759 |
| N | -3.729250 | -1.076520 | 0.490697  |
| O | -1.346541 | -1.626115 | -2.116799 |
| H | 0.063298  | 0.197034  | -2.328912 |
| H | -1.390797 | -1.677693 | 1.908673  |
| H | -0.249759 | 2.864305  | -3.118668 |
| H | -2.936877 | -2.979302 | -0.011989 |
| H | -4.109473 | -3.071746 | -2.112988 |
| H | -4.058485 | -1.313680 | -2.303678 |
| H | -5.768343 | -2.910457 | -0.312289 |
| H | -6.333961 | -1.662946 | -1.431453 |
| H | -5.719284 | -1.047853 | 1.209713  |
| H | -5.373795 | 0.114107  | -0.081442 |
| H | -0.037598 | -0.066421 | 2.846452  |
| H | -1.260423 | 1.155482  | 2.483610  |
| H | 1.042700  | -0.869174 | -0.197649 |
| H | -0.386353 | 3.569928  | 1.857523  |
| H | -0.827775 | 5.452743  | 0.292730  |
| H | -0.754449 | 5.089075  | -2.152370 |
| N | 4.420825  | 0.137988  | -1.342505 |
| C | 2.951644  | 1.204971  | 0.387142  |
| C | 5.123178  | -3.304831 | -0.128381 |
| C | 4.678623  | -1.892112 | -0.363693 |

|   |          |           |           |
|---|----------|-----------|-----------|
| C | 4.999878 | -1.093182 | -1.454821 |
| C | 3.701266 | 0.187841  | -0.163676 |
| C | 3.855940 | -1.090782 | 0.472363  |
| C | 3.234678 | -1.307586 | 1.730636  |
| C | 2.494841 | -0.296450 | 2.296499  |
| C | 2.275395 | 0.950977  | 1.616826  |
| H | 4.509435 | 0.887728  | -2.014137 |
| H | 2.853375 | 2.168753  | -0.102255 |
| H | 4.268135 | -3.987492 | -0.054004 |
| H | 5.760536 | -3.656043 | -0.944905 |
| H | 5.616076 | -1.332193 | -2.311271 |
| H | 3.370866 | -2.250598 | 2.251348  |
| H | 2.063810 | -0.436985 | 3.282400  |
| H | 1.971117 | 1.806099  | 2.212811  |
| H | 5.693454 | -3.396254 | 0.803823  |

Figure S23D Cation C6 Product

1 1

|   |           |           |           |
|---|-----------|-----------|-----------|
| N | 0.168642  | 0.394571  | -1.466474 |
| C | -3.072888 | -0.431485 | 1.424746  |
| O | -3.381382 | 0.357176  | 2.316885  |
| C | -1.668132 | -1.048162 | 1.294805  |
| C | -0.641526 | 2.772177  | -1.691039 |
| C | -3.515386 | -1.785976 | -0.618621 |
| C | -4.618686 | -1.589365 | -1.668184 |
| C | -5.857771 | -1.263766 | -0.815443 |
| C | -5.306373 | -0.403603 | 0.333660  |
| C | -2.101522 | -1.468799 | -1.111697 |
| C | -0.555606 | -0.271073 | 2.021804  |
| C | 0.352193  | 0.311056  | 0.910478  |
| C | 0.094140  | -0.550155 | -0.364885 |
| C | -0.231841 | 1.646064  | -0.976878 |
| C | -0.112376 | 1.676774  | 0.422680  |
| C | -0.388286 | 2.842772  | 1.128523  |
| C | -0.798885 | 3.981136  | 0.423350  |
| C | -0.923516 | 3.937355  | -0.969907 |
| N | -1.259926 | -1.080984 | -0.119984 |
| N | -3.917616 | -0.872197 | 0.469045  |
| O | -1.773660 | -1.547210 | -2.296960 |
| H | -0.245371 | 0.055398  | -2.330422 |
| H | -1.730707 | -2.073238 | 1.686633  |
| H | -0.742231 | 2.744607  | -2.772042 |
| H | -3.518144 | -2.826036 | -0.254411 |
| H | -4.745298 | -2.472641 | -2.297613 |
| H | -4.356684 | -0.747306 | -2.317050 |
| H | -6.294573 | -2.186115 | -0.416554 |
| H | -6.634128 | -0.743444 | -1.382000 |
| H | -5.844700 | -0.536664 | 1.276164  |
| H | -5.311186 | 0.665698  | 0.090407  |
| H | -0.017079 | -0.941926 | 2.691280  |
| H | -0.997211 | 0.517358  | 2.634675  |
| H | 0.800398  | -1.372166 | -0.512287 |
| H | -0.302018 | 2.873679  | 2.211940  |
| H | -1.028041 | 4.896268  | 0.960380  |
| H | -1.250461 | 4.823887  | -1.506250 |

|   |          |           |           |
|---|----------|-----------|-----------|
| N | 4.779457 | 0.844622  | -1.151920 |
| C | 2.714170 | 0.992737  | 0.227382  |
| C | 6.429390 | -2.348788 | -0.210321 |
| C | 5.543922 | -1.148574 | -0.366203 |
| C | 5.758958 | -0.070808 | -1.249783 |
| C | 3.862599 | 0.415356  | -0.193826 |
| C | 4.352643 | -0.851884 | 0.303651  |
| C | 3.599154 | -1.529113 | 1.315608  |
| C | 2.451074 | -0.974347 | 1.775609  |
| C | 1.902901 | 0.336331  | 1.294319  |
| H | 4.719801 | 1.701220  | -1.687705 |
| H | 2.371589 | 1.940826  | -0.173234 |
| H | 5.915727 | -3.264608 | -0.524454 |
| H | 7.334612 | -2.248246 | -0.814988 |
| H | 6.578373 | 0.069944  | -1.943049 |
| H | 3.956770 | -2.473638 | 1.712877  |
| H | 1.905312 | -1.482826 | 2.561932  |
| H | 1.937171 | 1.026408  | 2.159582  |
| H | 6.734403 | -2.483403 | 0.833155  |

Figure S23D Cation C7 TS

1 1

|   |           |           |           |
|---|-----------|-----------|-----------|
| N | -0.527346 | 0.146970  | 1.286103  |
| C | 3.172773  | 0.085885  | -1.319558 |
| O | 3.454134  | 0.941467  | -2.156795 |
| C | 1.845911  | -0.692482 | -1.341597 |
| C | -0.923877 | 2.576526  | 1.723200  |
| C | 3.611477  | -1.279184 | 0.724723  |
| C | 4.571094  | -0.960291 | 1.880368  |
| C | 5.829806  | -0.455489 | 1.153495  |
| C | 5.279595  | 0.352766  | -0.033354 |
| C | 2.127851  | -1.198525 | 1.086885  |
| C | 0.706530  | 0.016135  | -2.119050 |
| C | -0.350081 | 0.271807  | -1.055321 |
| C | -0.110613 | -0.644707 | 0.148886  |
| C | -0.700278 | 1.447219  | 0.915843  |
| C | -0.605750 | 1.569557  | -0.504236 |
| C | -0.733025 | 2.834221  | -1.116589 |
| C | -0.954194 | 3.941951  | -0.317899 |
| C | -1.046213 | 3.803730  | 1.090295  |
| N | 1.338490  | -0.849788 | 0.036835  |
| N | 3.977120  | -0.282273 | -0.301119 |
| O | 1.695424  | -1.419724 | 2.216437  |
| H | -0.276105 | -0.155293 | 2.219116  |
| H | 2.045845  | -1.679390 | -1.780700 |
| H | -0.989035 | 2.487699  | 2.802483  |
| H | 3.803394  | -2.295378 | 0.344566  |
| H | 4.753631  | -1.832904 | 2.510634  |
| H | 4.138383  | -0.173717 | 2.507328  |
| H | 6.419676  | -1.303320 | 0.788059  |
| H | 6.474122  | 0.148339  | 1.797224  |
| H | 5.913058  | 0.307119  | -0.923392 |
| H | 5.126270  | 1.408887  | 0.217919  |
| H | 0.355244  | -0.616615 | -2.933232 |
| H | 1.076584  | 0.948040  | -2.551477 |

|   |           |           |           |
|---|-----------|-----------|-----------|
| H | -0.638048 | -1.604183 | 0.132544  |
| H | -0.655878 | 2.932906  | -2.195503 |
| H | -1.050607 | 4.926012  | -0.764193 |
| H | -1.213348 | 4.691352  | 1.693528  |
| N | -3.615715 | 0.934179  | -0.224470 |
| C | -2.238938 | -0.350496 | -1.901063 |
| C | -5.024906 | -1.526235 | 2.188425  |
| C | -4.349514 | -0.751561 | 1.098394  |
| C | -4.364471 | 0.601002  | 0.908829  |
| C | -3.116791 | -0.188985 | -0.786158 |
| C | -3.552848 | -1.291776 | 0.014268  |
| C | -3.198665 | -2.579233 | -0.372326 |
| C | -2.431945 | -2.775954 | -1.545785 |
| C | -2.005459 | -1.703170 | -2.308078 |
| H | -3.513594 | 1.872212  | -0.588496 |
| H | -2.167527 | 0.435453  | -2.647088 |
| H | -4.300645 | -2.095980 | 2.783297  |
| H | -5.563613 | -0.857947 | 2.866280  |
| H | -4.854184 | 1.378417  | 1.477599  |
| H | -3.520538 | -3.438635 | 0.209189  |
| H | -2.195766 | -3.787703 | -1.859102 |
| H | -1.450000 | -1.884123 | -3.222397 |
| H | -5.746441 | -2.245078 | 1.781654  |

Figure S23D Cation C7 Product

1 1

|   |           |           |           |
|---|-----------|-----------|-----------|
| N | -0.389877 | 0.143650  | 1.390111  |
| C | 3.050916  | -0.226684 | -1.355094 |
| O | 3.194813  | 0.508531  | -2.330615 |
| C | 1.825902  | -1.140236 | -1.163382 |
| C | -0.245296 | 2.655794  | 1.321071  |
| C | 3.724612  | -1.198254 | 0.837609  |
| C | 4.716151  | -0.631846 | 1.864067  |
| C | 5.873344  | -0.120993 | 0.987129  |
| C | 5.176221  | 0.450943  | -0.258074 |
| C | 2.259511  | -1.164795 | 1.279453  |
| C | 0.591279  | -0.735558 | -1.987940 |
| C | -0.469930 | -0.264977 | -0.962592 |
| C | -0.061694 | -0.881347 | 0.414251  |
| C | -0.312212 | 1.381815  | 0.750978  |
| C | -0.378341 | 1.215857  | -0.644451 |
| C | -0.391986 | 2.323415  | -1.489445 |
| C | -0.335968 | 3.605053  | -0.927128 |
| C | -0.260425 | 3.759227  | 0.464273  |
| N | 1.386110  | -1.101225 | 0.241347  |
| N | 3.940743  | -0.344539 | -0.347884 |
| O | 1.915697  | -1.178240 | 2.462180  |
| H | 0.062618  | 0.024631  | 2.291979  |
| H | 2.139437  | -2.160216 | -1.426563 |
| H | -0.188021 | 2.784162  | 2.397611  |
| H | 3.979633  | -2.243180 | 0.598366  |
| H | 5.023488  | -1.384909 | 2.592571  |
| H | 4.243792  | 0.191911  | 2.408973  |
| H | 6.526924  | -0.952840 | 0.701774  |
| H | 6.486921  | 0.627846  | 1.494201  |

|   |           |           |           |
|---|-----------|-----------|-----------|
| H | 5.762485  | 0.343997  | -1.174863 |
| H | 4.922932  | 1.511468  | -0.141186 |
| H | 0.247527  | -1.582815 | -2.582876 |
| H | 0.858476  | 0.063139  | -2.683060 |
| H | -0.557209 | -1.822894 | 0.664650  |
| H | -0.436619 | 2.202233  | -2.568963 |
| H | -0.337830 | 4.478838  | -1.570818 |
| H | -0.209199 | 4.757879  | 0.888586  |
| N | -3.309709 | 1.174502  | -0.279515 |
| C | -1.964776 | -0.678065 | -1.402894 |
| C | -6.045628 | -0.332426 | 1.747708  |
| C | -4.882094 | 0.032276  | 0.879481  |
| C | -4.416610 | 1.276251  | 0.585506  |
| C | -3.036144 | -0.100200 | -0.543591 |
| C | -4.018303 | -0.884573 | 0.153046  |
| C | -4.022192 | -2.250520 | -0.008487 |
| C | -3.064556 | -2.885460 | -0.866912 |
| C | -2.119253 | -2.163820 | -1.522970 |
| H | -2.782199 | 1.967708  | -0.629816 |
| H | -2.062438 | -0.257351 | -2.416648 |
| H | -5.733746 | -0.969782 | 2.583291  |
| H | -6.515751 | 0.562907  | 2.162822  |
| H | -4.761147 | 2.250887  | 0.898453  |
| H | -4.761619 | -2.862981 | 0.500353  |
| H | -3.112304 | -3.961739 | -0.992615 |
| H | -1.419111 | -2.680493 | -2.169513 |
| H | -6.807154 | -0.882706 | 1.182687  |

Compound 6 Radical Cation

1 2

|   |           |           |           |
|---|-----------|-----------|-----------|
| N | 3.619127  | 1.673002  | 0.931523  |
| C | -1.733273 | -1.099358 | 0.570575  |
| O | -1.580032 | -2.071640 | 1.312202  |
| C | -0.534835 | -0.204420 | 0.182028  |
| C | 5.078210  | 0.312828  | -0.611681 |
| C | -3.137632 | 0.386325  | -0.872211 |
| C | -4.610126 | 0.742506  | -0.627587 |
| C | -5.248062 | -0.635664 | -0.374518 |
| C | -4.176133 | -1.421170 | 0.405296  |
| C | -2.148826 | 1.522737  | -0.668350 |
| C | 0.484949  | -0.227703 | 1.351284  |
| C | 1.834238  | 0.285755  | 0.991920  |
| C | 2.402535  | 1.516279  | 1.450478  |
| C | 3.936560  | 0.574921  | 0.111790  |
| C | 2.821250  | -0.304333 | 0.147473  |
| C | 2.878742  | -1.511649 | -0.579267 |
| C | 4.030813  | -1.792945 | -1.321724 |
| C | 5.106054  | -0.901486 | -1.340272 |
| N | -0.957245 | 1.159996  | -0.111026 |
| N | -2.916782 | -0.741228 | 0.045410  |
| O | -2.399530 | 2.672308  | -1.009656 |
| H | 4.226815  | 2.465868  | 1.109906  |
| H | -0.061681 | -0.659382 | -0.701903 |
| H | 5.922524  | 0.993590  | -0.629283 |
| H | -3.011950 | 0.045210  | -1.912663 |

|   |           |           |           |
|---|-----------|-----------|-----------|
| H | -5.047387 | 1.275625  | -1.473732 |
| H | -4.690320 | 1.381850  | 0.258280  |
| H | -5.458007 | -1.132239 | -1.328077 |
| H | -6.187255 | -0.569236 | 0.179932  |
| H | -4.131840 | -2.479203 | 0.131553  |
| H | -4.313902 | -1.360715 | 1.490264  |
| H | 0.548575  | -1.276145 | 1.664838  |
| H | 0.070359  | 0.339949  | 2.189549  |
| H | 1.970350  | 2.249518  | 2.118082  |
| H | 2.052844  | -2.215238 | -0.559595 |
| H | 4.091014  | -2.716637 | -1.886685 |
| H | 5.990802  | -1.139813 | -1.921274 |
| H | -0.256931 | 1.893523  | -0.102324 |

Iron Oxo Anion Triplet

-1 3

|    |           |           |           |
|----|-----------|-----------|-----------|
| Fe | -0.073428 | -0.001837 | -0.310750 |
| N  | -1.285124 | 1.621577  | -0.180319 |
| N  | 1.550558  | 1.202948  | -0.287649 |
| N  | -1.696456 | -1.204347 | -0.144644 |
| N  | 1.140382  | -1.622091 | -0.276528 |
| C  | -2.653288 | 1.625993  | -0.140660 |
| C  | 2.861008  | 0.816128  | -0.389064 |
| C  | -0.893012 | 2.933033  | -0.183909 |
| C  | 1.550140  | 2.572226  | -0.278258 |
| C  | -3.008853 | -0.817351 | -0.108820 |
| C  | 2.505740  | -1.627396 | -0.376674 |
| C  | -1.694549 | -2.574003 | -0.127759 |
| C  | 0.748032  | -2.933298 | -0.248929 |
| C  | -3.145308 | 2.987235  | -0.115666 |
| C  | 3.719618  | 1.979164  | -0.432436 |
| C  | -2.052645 | 3.798599  | -0.140802 |
| C  | 2.906279  | 3.069250  | -0.359767 |
| C  | -3.868012 | -1.980310 | -0.060118 |
| C  | 2.996351  | -2.988679 | -0.404731 |
| C  | -3.052198 | -3.070631 | -0.070422 |
| C  | 1.905274  | -3.799150 | -0.322812 |
| H  | -4.192029 | 3.263174  | -0.079544 |
| H  | 4.799621  | 1.945343  | -0.506726 |
| H  | -2.013474 | 4.880896  | -0.131048 |
| H  | 3.178594  | 4.117521  | -0.364451 |
| H  | -4.949813 | -1.945731 | -0.021225 |
| H  | 4.040958  | -3.265924 | -0.475557 |
| H  | -3.323941 | -4.118684 | -0.043185 |
| H  | 1.866285  | -4.881470 | -0.313659 |
| C  | -3.464513 | 0.497224  | -0.110210 |
| C  | 3.314956  | -0.497415 | -0.436220 |
| C  | -0.565377 | -3.384350 | -0.172930 |
| C  | 0.421338  | 3.383954  | -0.223028 |
| H  | -4.538521 | 0.653658  | -0.075410 |
| H  | 4.386730  | -0.653329 | -0.515941 |
| H  | -0.722758 | -4.458756 | -0.156214 |
| H  | 0.580286  | 4.458240  | -0.221891 |
| O  | -0.140198 | -0.004882 | -1.957473 |
| S  | -0.077129 | -0.034934 | 2.209741  |

|   |          |          |          |
|---|----------|----------|----------|
| C | 1.657207 | 0.073177 | 2.813500 |
| H | 2.134832 | 1.007989 | 2.502419 |

|   |          |           |          |
|---|----------|-----------|----------|
| H | 1.660012 | 0.034311  | 3.908788 |
| H | 2.263352 | -0.758495 | 2.439339 |

**Supplementary Figure 23.** Reaction coordinate diagrams for formation of (+)-nasezeazine B (**2**), and single electron oxidation to radical cation.

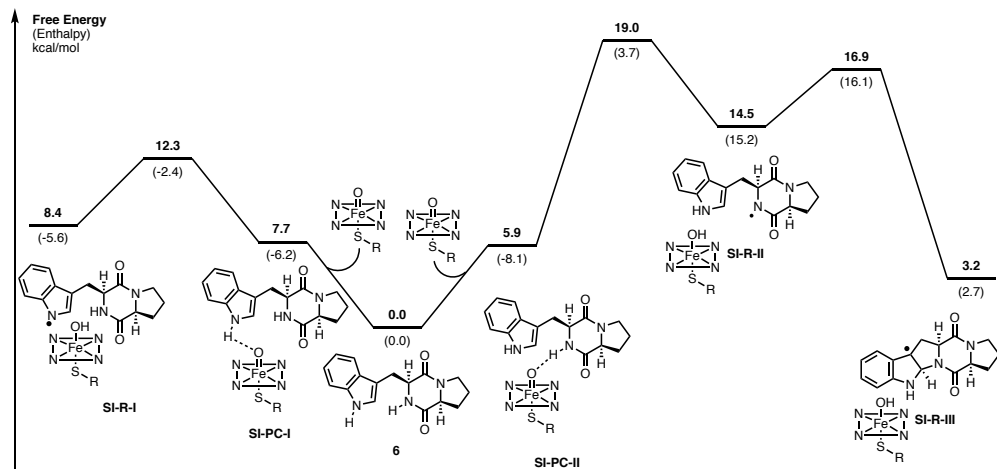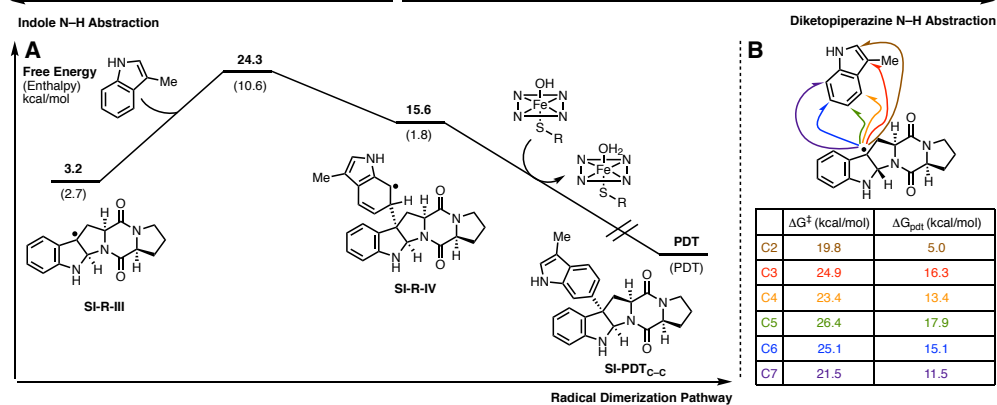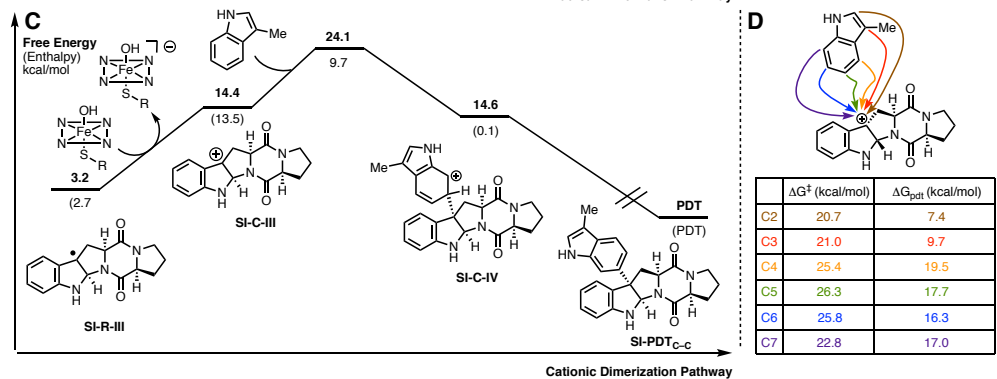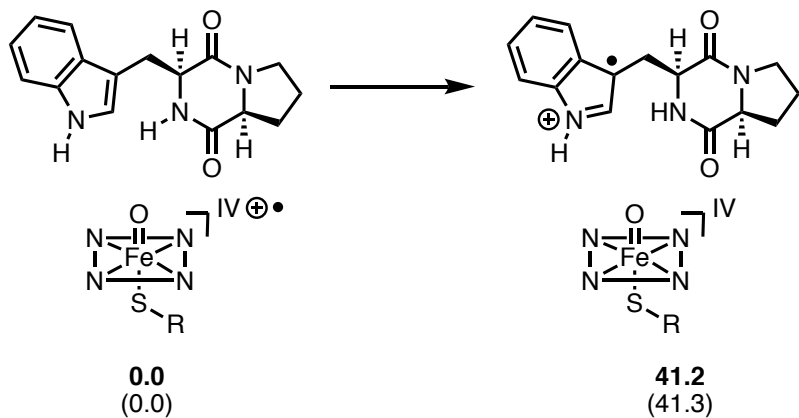

## Computational References:

- Schrödinger Release 2017-2: MacroModel, Schrödinger, LLC, New York, NY, 2017.
- Gaussian 09, Revision D.01, Frisch, M. J.; Trucks, G. W.; Schlegel, H. B.; Scuseria, G. E.; Robb, M. A.; Cheeseman, J. R.; Scalmani, G.; Barone, V.; Mennucci, B.; Petersson, G. A.; Nakatsuji, H.; Caricato, M.; Li, X.; Hratchian, H. P.; Izmaylov, A. F.; Bloino, J.; Zheng, G.; Sonnenberg, J. L.; Hada, M.; Ehara, M.; Toyota, K.; Fukuda, R.; Hasegawa, J.; Ishida, M.; Nakajima, T.; Honda, Y.; Kitao, O.; Nakai, H.; Vreven, T.; Montgomery, Jr., J. A.; Peralta, J. E.; Ogliaro, F.; Bearpark, M.; Heyd, J. J.; Brothers, E.; Kudin, K. N.; Staroverov, V. N.; Keith, T.; Kobayashi, R.; Normand, J.; Raghavachari, K.; Rendell, A.; Burant, J. C.; Iyengar, S. S.; Tomasi, J.; Cossi, M.; Rega, N.; Millam, J. M.; Klene, M.; Knox, J. E.; Cross, J. B.; Bakken, V.; Adamo, C.; Jaramillo, J.; Gomperts, R.; Stratmann, R. E.; Yazyev, O.; Austin, A. J.; Cammi, R.; Pomelli, C.; Ochterski, J. W.; Martin, R. L.; Morokuma, K.; Zakrzewski, V. G.; Voth, G. A.; Salvador, P.; Dannenberg, J. J.; Dapprich, S.; Daniels, A. D.; Farkas, O.; Foresman, J. B.; Ortiz, J. V.; Cioslowski, J.; Fox, D. J. Gaussian, Inc., Wallingford, CT, 2013.
- Becke, A. D. Density-functional Thermochemistry. III. The Role of Exact Exchange. *J. Chem. Phys.* **1993**, *98*, 5648–5652.
- Lee, C.; Yang, W.; Parr, R. G. Development of the Colle-Salvetti Correlation-Energy Formula into a Functional of the Electron Density. *Phys. Rev. B*, **1988**, *37*, 785–789.
- Hay, P. J.; Wadt, W. R. Ab Initio Effective Core Potentials for Molecular Calculations. Potentials for the Transition Metal Atoms Sc to Hg. *J. Chem. Phys.* **1985**, *82*, 270–283.
- Miertuš, S.; Scrocco, E.; Tomasi, J. Electrostatic Interaction of a Solute with a Continuum. A Direct Utilization of Ab Initio Molecular Potentials for the Prediction of Solvent Effects. *Chem. Phys.* **1981**, *55*, 117–129.
- Miertuš, S.; Tomasi, J. Approximate Evaluations of the Electrostatic Free Energy and Internal Energy Changes in Solution Processes. *Chem. Phys.* **1982**, *65*, 239–245.
- Pascual-ahuir, J. L.; Silla, E.; Tuñón, I. GEPOL: An Improved Description of Molecular Surfaces. III. A New Algorithm for the Computation of a Solvent-Excluding Surface. *J. Comput. Chem.* **1994**, *15*, 1127–1138.
- Ribeiro, R. F.; Marenich, A. V.; Cramer, C. J.; Truhlar, D. G. Use of Solution-Phase Vibrational Frequencies in Continuum Models for the Free Energy of Solvation. *J. Phys. Chem. B* **2011**, *115*, 14556–14562.
- Grimme, S.; Antony, J.; Ehrlich, S.; Krieg, H. A Consistent and Accurate Ab Initio Parametrization of Density Functional Dispersion Correction (DFT-D) for the 94 Elements H-Pu. *J. Chem. Phys.* **2010**, *132*, 154104.
- Grimme, S.; Ehrlich, S.; Goerigk, L. Effect of the Damping Function in Dispersion Corrected Density Functional Theory. *J. Comput. Chem.* **2011**, *32*, 1456–1465.

## Chemistry

### General Procedures:

All reactions were performed in oven-dried or flame-dried round-bottom flasks. The flasks were fitted with rubber septa and reactions were conducted under a positive pressure of argon. Gas-tight syringes with stainless steel needles or cannulae were used to transfer air- and moisture-sensitive liquids. Where necessary (so noted), reactions were performed in Schlenk tubes fitted with a PTFE stopcock. Flash column chromatography was performed as described by Still et al. using granular silica gel (60 Å pore size, 40–63 µm, 4–6% H<sub>2</sub>O content, Zeochem). Analytical thin layer chromatography (TLC) was performed using glass plates pre-coated with 0.25 mm 230–400 mesh silica gel impregnated with a fluorescent indicator (254 nm). TLC plates were visualized by exposure to short wave ultraviolet light (254 nm) and an aqueous solution of ceric ammonium molybdate (CAM) followed by heating on a hot plate (~250 °C). Organic solutions were concentrated at 29–30 °C on rotary evaporators capable of achieving a minimum pressure of ~2 torr.

### Materials:

Commercial reagents and solvents were used as received with the following exceptions: dichloromethane, acetonitrile, tetrahydrofuran, methanol, pyridine, toluene, and triethylamine were purchased from J.T. Baker (Cycletainer™) and were purified by the method of Grubbs et al. under positive argon pressure. Nitroethane was distilled over calcium hydride and stored over 4 Å molecular sieves. Silver hexafluoroantimonate was purchased from Strem Chemicals, Inc. All other solvents and chemicals were purchased from Sigma–Aldrich.

### Instrumentation:

Proton nuclear magnetic resonance (<sup>1</sup>H NMR) spectra were recorded with Varian inverse probe INOVA-500 and Varian INOVA-500 spectrometers, or a Bruker AVANCE III 400 spectrometer. Chemical shifts are reported in parts per million on the δ scale, and are referenced from the residual protium in the NMR solvent (CHCl<sub>3</sub>: δ 7.26, CD<sub>3</sub>SOCD<sub>2</sub>H: δ 2.50, CD<sub>2</sub>HOD: δ 3.31). Data are reported as follows: chemical shift [multiplicity (s = singlet, d = doublet, t = triplet, m = multiplet), coupling constant(s) in Hertz, integration, assignment]. Carbon-13 nuclear magnetic resonance (<sup>13</sup>C NMR) spectra were recorded with a Varian INOVA-500 spectrometer or a Bruker AVANCE III 400 spectrometer and are reported in parts per million on the δ scale, and are referenced from the carbon resonances of the solvent (CDCl<sub>3</sub>: δ 77.16, DMSO-d<sub>6</sub>: δ 39.52, CD<sub>3</sub>OD: δ 49.00). Data are reported as follows: chemical shift (assignment). Infrared data (IR) were obtained with a Perkin-Elmer 2000 FTIR, and are reported as follows: frequency of absorption (cm<sup>-1</sup>), intensity of absorption (s = strong, m = medium, w = weak, br = broad). Optical rotations were measured on a Jasco-1010 polarimeter. UV-Vis spectrophotometric data were acquired on a Varian Cary 50 Bio UV-Vis spectrophotometer. Preparative HPLC was performed on a Waters system with the 1525 Binary HPLC Pump, 2489 UV/Vis Detector, 3100 Mass Detector, System Fluidics Organizer, and 2767 Sample Manager components. We thank Liam P. Kelly for obtaining the mass spectrometric data at the Department of Chemistry's Instrumentation Facility, Massachusetts Institute of Technology. High resolution mass spectra (HRMS) were recorded on a Bruker Daltonics APEXIV 4.7 Tesla FT-ICR-MS using either an electrospray (ESI) or direct analysis in real time (DART) ionization source.

### Positional Numbering System.

In assigning the  $^1\text{H}$  and  $^{13}\text{C}$  NMR data of all intermediates en route to our total syntheses of (–)-nasezeazine C and (–)-iso-nasezeazine C, we wished to employ a uniform numbering scheme. This numbering system is also consistent with that employed in the isolation papers of nasezeazine C and iso-nasezeazine B.<sup>1,2</sup>

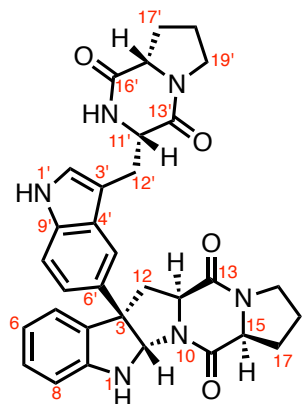

(–)-nasezeazine C (**4**)

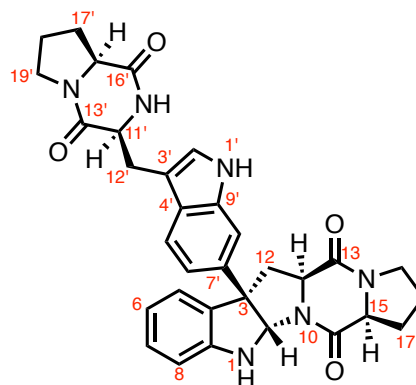

(–)-iso-nasezeazine C (**11**)



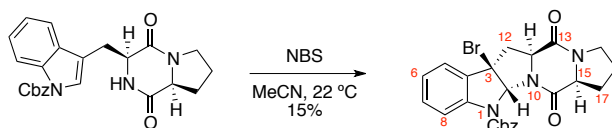

**Diketopiperazine bromide (-)-8:** A sample of N-bromosuccinimide (641 mg, 3.60 mmol, 3.00 equiv) was added in one portion to a stirred suspension of diketopiperazine **7** (500 mg, 1.20 mmol, 1 equiv) in acetonitrile (60 mL). After 25 min, a solution of saturated aqueous sodium thiosulfate solution (30 mL) was added to the reaction mixture. After 10 min, the reaction mixture was diluted with ethyl acetate (30 mL), and washed with saturated aqueous sodium thiosulfate solution (30 mL). The aqueous layer was extracted with ethyl acetate (3 × 20 mL) and the combined organic layers were dried over anhydrous sodium sulfate, were filtered, and were concentrated under reduced pressure. The crude reaction mixture was purified by flash column chromatography on silica gel (eluent: 30→35% ethyl acetate in hexanes), including a second chromatographic purification (eluent: 30→35% ethyl acetate in hexanes) to afford diketopiperazine bromide (-)-**8** (90.5 mg, 14.8%) as an off-white foam.

Structural assignments were made using additional information from gCOSY, HSQC, HMBC and nOe experiments. <sup>1</sup>H NMR (MHz, CDCl<sub>3</sub>, 20 °C): δ 7.69 (app-br-s, 1H, C8H), 7.48 (app-d, J = 7.3 Hz, 2H, PhCbz-o-H), 7.43 (d, J = 7.7 Hz, 1H, C5H), 7.41–7.30 (m, 4H, C7H, PhCbz-m-H, PhCbz-p-H), 7.16 (app-t, J = 7.5 Hz, 1H, C6H), 6.57 (s, 1H, C2H), 5.43 (d, J = 12.2 Hz, 1H, PhCbzCHa), 5.31 (d, J = 12.3 Hz, 1H, PhCbzCHb), 4.04 (app-t, J = 8.2 Hz, 1H, C15H), 3.97 (dd, J = 5.9, 11.4 Hz, 1H, C11H), 3.62–3.45 (m, 2H, C19H), 3.35 (dd, J = 5.9, 13.2 Hz, 1H, C12Ha), 3.01 (dd, J = 11.0, 13.2 Hz, 1H, C12Hb), 2.35–2.23 (m, 1H, C17Ha), 2.25–2.14 (m, 1H, C17Hb), 2.10–1.97 (m, 1H, C18Ha), 1.95–1.80 (m, 1H, C18Hb). <sup>13</sup>C NMR (100 MHz, CDCl<sub>3</sub>, 20 °C): δ 165.8 (C16), 164.2 (C13), 153.0 (NC=OCbz), 141.4 (C9), 135.8 (PhCbz-i-C), 132.0 (C4), 131.2 (PhCbz), 128.7 (C7), 128.5 (PhCbz-o-C), 128.4 (PhCbz), 125.1 (C6), 123.9 (C5), 117.7 (C8), 83.3 (C2), 68.6, 60.4 (2C, C11, C15), 59.0 (C3), 45.6 (C19), 43.1 (C12), 27.8 (C17), 23.1 (C18). FTIR (thin film) cm<sup>-1</sup>: 2957 (w), 2887 (w), 1716 (s), 1674 (s), 1329 (m). HRMS (ESI) (m/z): calc'd for C<sub>24</sub>H<sub>23</sub>BrN<sub>3</sub>O<sub>4</sub> [M+H]<sup>+</sup>: 496.0866, found: 496.0858. [α]<sub>D</sub><sup>24</sup>: -168 (c = 0.46, CH<sub>2</sub>Cl<sub>2</sub>). TLC (70% ethyl acetate in hexanes), R<sub>f</sub>: 0.22 (UV, CAM).

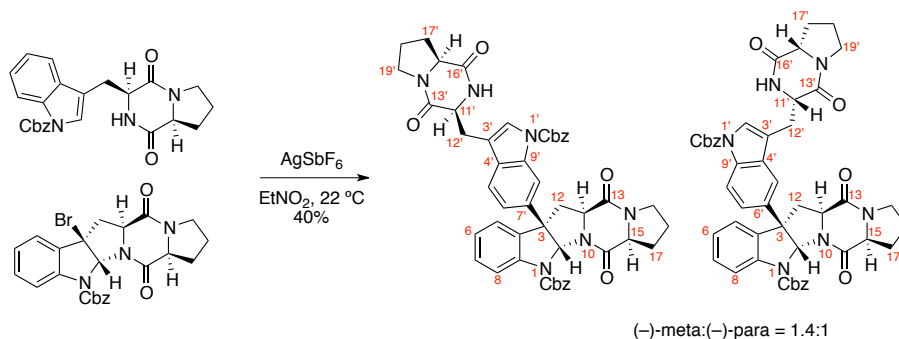

**meta(-)- $N^{in}$ , $N^{in}$ -Dicarboxybenzyl iso-Naseseazine C (10) and para(-)- $N^{in}$ , $N^{in}$ -Dicarboxybenzyl Naseseazine C (9):** Diketopiperazine bromide (-)-8 (100 mg, 0.196 mmol, 1 equiv) and proline diketopiperazine 7 (245 mg, 0.588 mmol, 3.00 equiv) were azeotropically dried from anhydrous benzene ( $3 \times 0.5$  mL) and the residue was suspended in freshly distilled nitroethane (9.8 mL). Silver hexafluoroantimonate (202 mg, 0.588 mmol, 3.00 equiv) was then added as a solid in a single portion. After 4.5 h, the reaction mixture was diluted with dichloromethane (15 mL) and washed with a mixture of saturated aqueous sodium bicarbonate and saturated aqueous sodium thiosulfate (10:1 v/v, 15 mL). The resulting aqueous layer was extracted with dichloromethane ( $3 \times 10$  mL) and the combined organic layers were dried over anhydrous sodium sulfate, were filtered, and were concentrated under reduced pressure. The crude reaction mixture was purified by flash column chromatography on silica gel (eluent: 10 $\rightarrow$ 50% acetone in dichloromethane) to afford a regioisomeric mixture of (-)-10 and (-)-9 (65.6 mg, 40.1%, (-)-10:(-)-9, 1.4:1) as a white foam. Regioisomers (-)-10 and (-)-9 were separated for the purpose of full and independent characterization by preparative HPLC [Luna preparative HPLC column, C18, 5  $\mu$ m, 21.2  $\times$  250 mm; 7.0 mL/min; gradient, 5% $\rightarrow$ 100% acetonitrile in water with 0.1% formic acid, 60 min;  $t_R$ (-)-10 = 48.3 min,  $t_R$ (-)-9 = 50.4 min]. Structural assignments were made using additional information from gCOSY, HSQC, HMBC and nOe experiments.

**para(-)- $N^{in}$ , $N^{in}$ -Dicarboxybenzyl Naseseazine C (9):**  $^1\text{H}$  NMR (500 MHz,  $\text{CDCl}_3$ , 20  $^\circ\text{C}$ ):  $\delta$  7.99 (br-s, 1H,  $\text{C}_8\text{H}$ ), 7.71 (br-s, 1H,  $\text{C}_8\text{H}$ ), 7.53 (s, 1H,  $\text{C}_2\text{H}$ ), 7.48–7.43 (m, 3H,  $\text{C}_5\text{H}$ ,  $\text{Ph}_{\text{Cbz}}\text{-H}$ ), 7.43–7.35 (m, 5H,  $\text{Ph}_{\text{Cbz}}\text{-H}$ ), 7.34–7.26 (m, 4H,  $\text{C}_7\text{H}$ ,  $\text{Ph}_{\text{Cbz}}\text{-H}$ ), 7.22 (d,  $J = 7.4$  Hz, 1H,  $\text{C}_5\text{H}$ ), 7.10 (app-t,  $J = 7.5$  Hz, 1H,  $\text{C}_6\text{H}$ ), 7.04 (d,  $J = 8.8$  Hz, 1H,  $\text{C}_7\text{H}$ ), 6.61 (s, 1H,  $\text{C}_2\text{H}$ ), 5.69 (s, 1H,  $\text{N}_{10}\text{H}$ ), 5.42 (app-s, 2H,  $\text{Ph}_{\text{Cbz}}\text{-CH}_2$ ), 5.39 (d,  $J = 12.2$  Hz, 1H,  $\text{Ph}_{\text{Cbz}}\text{-CH}_a$ ), 5.28 (d,  $J = 12.3$  Hz, 1H,  $\text{Ph}_{\text{Cbz}}\text{-CH}_b$ ), 4.31 (dd,  $J = 3.5, 10.7$  Hz, 1H,  $\text{C}_{11}\text{H}$ ), 4.15 (dd,  $J = 5.8, 11.3$  Hz, 1H,  $\text{C}_{11}\text{H}$ ), 4.10 (app-q,  $J = 7.8$  Hz, 2H,  $\text{C}_{15}\text{H}$ ,  $\text{C}_{15}\text{H}$ ), 3.69–3.47 (m, 5H,  $\text{C}_{12}\text{H}_a$ ,  $\text{C}_{19}\text{H}$ ,  $\text{C}_{19}\text{H}$ ), 3.16 (dd,  $J = 5.8, 12.9$  Hz, 1H,  $\text{C}_{12}\text{H}_a$ ), 2.91–2.82 (m, 2H,  $\text{C}_{12}\text{H}_b$ ,  $\text{C}_{12}\text{H}_b$ ), 2.36–2.27 (m, 2H,  $\text{C}_{17}\text{H}$ ), 2.27–2.11 (m, 1H,  $\text{C}_{17}\text{H}_a$ ), 2.11–1.95 (m, 3H,  $\text{C}_{17}\text{H}_b$ ,  $\text{C}_{18}\text{H}$ ), 1.96–1.84 (m, 2H,  $\text{C}_{18}\text{H}$ ).  $^{13}\text{C}$  NMR (125 MHz,  $\text{CDCl}_3$ , 20  $^\circ\text{C}$ ):  $\delta$  169.5 ( $\text{C}_{16}$ ), 166.0 ( $\text{C}_{16}$ ), 165.4 ( $\text{C}_{13}$ ), 164.9 ( $\text{C}_{13}$ ), 153.1 ( $\text{C}_{\text{Cbz}}=\text{O}$ ), 150.4 ( $\text{C}_{\text{Cbz}}=\text{O}$ ), 141.5 ( $\text{C}_9$ ), 136.6 ( $\text{C}_6$ ), 136.1 ( $\text{Ph}_{\text{Cbz}}\text{-i-C}$ ), 135.1 ( $\text{C}_4$ ), 134.8 (2C,  $\text{C}_9$ ,  $\text{Ph}_{\text{Cbz}}\text{-i-C}$ ), 130.0 ( $\text{C}_4$ ), 129.3 ( $\text{C}_7$ ), 129.0 (2C,  $\text{Ph}_{\text{Cbz}}\text{-C}$ ), 128.8 ( $\text{Ph}_{\text{Cbz}}\text{-C}$ ), 128.6 ( $\text{Ph}_{\text{Cbz}}\text{-C}$ ), 128.3 (2C,  $\text{Ph}_{\text{Cbz}}\text{-C}$ ), 125.0 ( $\text{C}_2$ ), 124.8 ( $\text{C}_6$ ), 124.0 ( $\text{C}_5$ ), 123.6 ( $\text{C}_7$ ), 117.6 ( $\text{C}_8$ ), 116.3 ( $\text{C}_8$ ), 116.0 ( $\text{C}_3$ ), 115.4 ( $\text{C}_5$ ), 81.9 ( $\text{C}_2$ ), 69.2 ( $\text{Ph}_{\text{Cbz}}\text{-CH}_2$ ), 68.3 ( $\text{Ph}_{\text{Cbz}}\text{-CH}_2$ ), 60.7 ( $\text{C}_{11}$  or  $\text{C}_{15}$ ), 60.6 ( $\text{C}_{11}$  or  $\text{C}_{15}$ ), 59.3 ( $\text{C}_{15}$ ), 58.2 ( $\text{C}_3$ ), 53.9 ( $\text{C}_{11}$ ), 45.6 ( $\text{C}_{19}$  or  $\text{C}_{19}$ ), 45.5 ( $\text{C}_{19}$  or  $\text{C}_{19}$ ), 39.6 ( $\text{C}_{12}$ ), 28.4 ( $\text{C}_{17}$ ), 27.9 ( $\text{C}_{17}$ ), 26.5 ( $\text{C}_{12}$ ), 23.1 ( $\text{C}_{18}$ ), 22.8 ( $\text{C}_{18}$ ). FTIR (thin film)  $\text{cm}^{-1}$ : 3472 (br-m), 2956 (w), 1716 (s), 1668 (s), 1479 (m), 1401 (m). HRMS (ESI) ( $m/z$ ): calc'd for  $\text{C}_{48}\text{H}_{45}\text{N}_6\text{O}_8$  [ $\text{M}+\text{H}$ ] $^+$ : 833.3293, found: 833.3286.  $[\alpha]_D^{24}$ :  $-128$  ( $c = 0.24$ ,  $\text{CH}_2\text{Cl}_2$ ). TLC (70% acetone in hexanes),  $R_f$ : 0.24 (UV, CAM).

**meta(-)- $N^{in}$ , $N^{in}$ -Dicarboxybenzyl iso-Naseseazine C (10):**  $^1\text{H}$  NMR (MHz,  $\text{CDCl}_3$ , 20  $^\circ\text{C}$ ):  $\delta$  8.19 (br-s, 1H,  $\text{C}_8\text{H}$ ), 7.73 (br-s, 1H,  $\text{C}_8\text{H}$ ), 7.50 (s, 1H,  $\text{C}_2\text{H}$ ), 7.48–7.38 (m, 6H,  $\text{Ph}_{\text{Cbz}}\text{-H}$ ), 7.38–7.34 (m, 2H,  $\text{C}_5\text{H}$ ,  $\text{Ph}_{\text{Cbz}}\text{-H}$ ), 7.34–7.26 (m, 4H,  $\text{C}_7\text{H}$ ,  $\text{Ph}_{\text{Cbz}}\text{-H}$ ), 7.19 (d,  $J = 7.5$  Hz, 1H,  $\text{C}_5\text{H}$ ), 7.08 (d,  $J = 7.5$  Hz, 1H,  $\text{C}_6\text{H}$ ), 7.07–7.02 (m, 1H,  $\text{C}_6\text{H}$ ), 6.64 (s, 1H,  $\text{C}_2\text{H}$ ), 5.57 (s, 1H,  $\text{N}_{10}\text{H}$ ), 5.41 (d,  $J = 12.3$  Hz, 1H,  $\text{Ph}_{\text{Cbz}}\text{-CH}_a$ ), 5.39 (app-s, 2H,  $\text{Ph}_{\text{Cbz}}\text{-CH}_2$ ), 5.28 (d,  $J = 12.3$  Hz, 1H,  $\text{Ph}_{\text{Cbz}}\text{-CH}_b$ ), 4.29 (dd,  $J = 2.9, 10.2$  Hz, 1H,  $\text{C}_{11}\text{H}$ ), 4.18–4.14 (m, 1H,  $\text{C}_{11}\text{H}$ ), 4.14–4.08 (m, 1H,  $\text{C}_{15}\text{H}$ ), 4.05 (app-t,  $J = 8.0$  Hz, 1H,  $\text{C}_{15}\text{H}$ ), 3.67–3.50 (m, 5H,  $\text{C}_{12}\text{H}_a$ ,  $\text{C}_{19}\text{H}$ ,  $\text{C}_{19}\text{H}$ ), 3.15 (dd,  $J = 5.8, 12.9$  Hz, 1H,  $\text{C}_{12}\text{H}_a$ ), 2.92–2.81 (m, 2H,  $\text{C}_{12}\text{H}_b$ ,  $\text{C}_{12}\text{H}_b$ ), 2.37–2.28 (m, 2H), 2.27–2.15 (m, 1H,  $\text{C}_{17}\text{H}$ ), 2.11–1.98 (m, 3H,  $\text{C}_{17}\text{H}_b$ ,  $\text{C}_{18}\text{H}$ ), 1.98–1.85 (m, 2H,  $\text{C}_{18}\text{H}$ ).  $^{13}\text{C}$  NMR (MHz,  $\text{CDCl}_3$ , 20  $^\circ\text{C}$ ):  $\delta$  169.4 ( $\text{C}_{16}$ ), 166.0 ( $\text{C}_{16}$ ), 165.4 ( $\text{C}_{13}$ ), 165.0 ( $\text{C}_{13}$ ), 153.1 ( $\text{C}_{\text{Cbz}}=\text{O}$ ), 150.3 ( $\text{C}_{\text{Cbz}}=\text{O}$ ), 141.5 ( $\text{C}_9$ ), 138.8 ( $\text{C}_7$ ), 136.2 (2C,  $\text{C}_4$ ,  $\text{Ph}_{\text{Cbz}}\text{-i-C}$ ), 134.9 (3C,  $\text{C}_4$ ,  $\text{C}_9$ ,  $\text{Ph}_{\text{Cbz}}\text{-i-C}$ ), 129.3 ( $\text{C}_7$ ), 129.0 (2C,  $\text{Ph}_{\text{Cbz}}\text{-C}$ ), 128.8 ( $\text{Ph}_{\text{Cbz}}\text{-C}$ ), 128.6 ( $\text{Ph}_{\text{Cbz}}\text{-C}$ ),

128.3 (Ph<sub>Cbz</sub>-C), 128.2 (Ph<sub>Cbz</sub>-C), 124.8 (C<sub>2'</sub>), 124.7 (C<sub>7'</sub>), 124.0 (C<sub>5</sub>), 121.1 (C<sub>6</sub>), 119.5 (C<sub>5'</sub>), 117.6 (C<sub>8</sub>), 115.7 (C<sub>3'</sub>), 113.0 (C<sub>8'</sub>), 81.8 (C<sub>2</sub>), 69.1 (Ph<sub>Cbz</sub>-CH<sub>2</sub>), 68.3 (Ph<sub>Cbz</sub>-CH<sub>2</sub>), 60.7 (C<sub>11</sub> or C<sub>15'</sub>), 60.6 (C<sub>11</sub> or C<sub>15'</sub>), 59.3 (C<sub>15</sub>), 58.6 (C<sub>3</sub>), 54.0 (C<sub>11'</sub>), 45.6 (C<sub>19</sub> or C<sub>19'</sub>), 45.5 (C<sub>19</sub> or C<sub>19'</sub>), 39.4 (C<sub>12</sub>), 28.4 (C<sub>17'</sub>), 28.0 (C<sub>17</sub>), 26.5 (C<sub>12'</sub>), 23.1 (C<sub>18'</sub>), 22.7 (C<sub>18</sub>). FTIR (thin film) cm<sup>-1</sup>: 3472 (br-m), 2955 (w), 1713 (s), 1667 (s), 1480 (m), 1398 (m). HRMS (ESI) (*m/z*): calc'd for C<sub>48</sub>H<sub>45</sub>N<sub>6</sub>O<sub>8</sub> [M+H]<sup>+</sup>: 833.3293, found: 833.3278. [ $\alpha$ ]<sub>D</sub><sup>24</sup>: -166 (*c* = 0.26, CHCl<sub>3</sub>). TLC (70% acetone in hexanes), *R<sub>f</sub>*: 0.28 (UV, CAM).

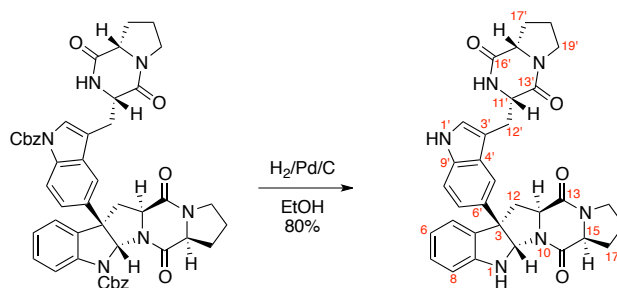

**(-)-Naseseazine C (4):** Palladium on activated charcoal (3.3 mg, 3.1  $\mu\text{mol}$ , 20 mol%) was added to a solution of para(-)-Nin,Nin'-dicarboxybenzyl naseseazine C (-)-**9** (12.9 mg, 30.4  $\mu\text{mol}$ , 1 equiv) in degassed ( $\text{N}_2$  stream, 5 min) ethanol (1.6 mL). A stream of hydrogen gas was passed through the heterogeneous mixture for 2 min by discharge of a balloon equipped with a needle extending into the reaction mixture. After stirring the reaction mixture at 22  $^\circ\text{C}$  for 21 h under an atmosphere of hydrogen gas, the solution was degassed ( $\text{N}_2$  stream, 5 min) and filtered through Celite. The filter cake was washed with methanol ( $3 \times 2$  mL) and the combined filtrates were concentrated under reduced pressure. The crude reaction mixture was purified by flash column chromatography on silica gel (eluent: 70 $\rightarrow$  90% acetone in dichloromethane) to afford (-)-**4** (7.0 mg, 80%). Structural assignments were made using additional information from gCOSY, HSQC, HMBC and nOe experiments.

$^1\text{H}$  NMR (MHz,  $\text{CD}_3\text{OD}$ , 20  $^\circ\text{C}$ ):  $\delta$  7.64 (d,  $J = 1.8$  Hz, 1H, C5'H), 7.24 (d,  $J = 8.6$  Hz, 1H, C8'H), 7.19 (d,  $J = 7.4$  Hz, 1H, C5'H), 7.13 (dd,  $J = 1.9, 8.6$  Hz, 1H, C7'H), 7.08 (s, 1H, C2'H), 7.06 (td,  $J = 1.2, 7.6$  Hz, 1H, C7'H), 6.75 (td,  $J = 1.0, 7.5$  Hz, 1H, C6'H), 6.71 (d,  $J = 8.1$  Hz, 1H, C8'H), 5.70 (s, 1H, C2'H), 4.39 (td,  $J = 1.8, 4.9$  Hz, 1H, C11'H), 4.31–4.23 (m, 2H, C11'H, C15'H), 3.97 (ddd,  $J = 1.9, 6.4, 10.9$  Hz, 1H, C15'H), 3.54–3.47 (m, 2H, C19'H), 3.45–3.39 (m, 1H, C19'Ha), 3.28 (app-d,  $J = 5.2$  Hz, 2H, C12'H), 3.26–3.21 (m, 1H, C19'Hb), 3.12 (dd,  $J = 6.1, 12.7$  Hz, 1H, C12Ha), 2.95–2.88 (m, 1H, C12Hb), 2.33–2.25 (m, 1H, C17Ha), 2.10–2.00 (m, 2H, C17Hb, C18Ha), 1.98–1.87 (m, 2H, C17'Ha, C18Hb), 1.71–1.60 (m, 1H, C18'Ha), 1.48–1.40 (m, 1H, C18'Hb), 0.98–0.88 (m, 1H, C17'Hb).  $^1\text{H}$  NMR (MHz,  $\text{DMSO}-d_6$ , 20  $^\circ\text{C}$ ):  $\delta$  10.84 (s, 1H, N1'H), 7.74 (s, 1H, N10'H), 7.63 (s, 1H, C5'H), 7.22 (d,  $J = 8.6$  Hz, 1H, C8'H), 7.17 (s, 1H, C8'H), 7.16 (d,  $J = 8.7$  Hz, 1H, C5'H), 7.03 (d,  $J = 8.6$  Hz, 1H, C7'H), 6.98 (app-t,  $J = 7.7$  Hz, 1H, C7'H), 6.65 (d,  $J = 8.6$  Hz, C8H), 6.64 (s, 1H, N1H), 6.61 (app-t,  $J = 7.4$  Hz, 1H, C6'H), 5.63 (s, 1H, C2'H), 4.35–4.27 (m, 2H, C11'H, C15'H), 4.16 (dd,  $J = 6.1, 11.4$  Hz, 1H, C11'H), 4.09 (app-t,  $J = 8.4$  Hz, 1H, C15'H), 3.45–3.33 (m, 3H, C19'H, C19'Ha), 3.33–3.23 (m, 1H, C19'Hb), 3.22 (dd,  $J = 4.8, 14.9$  Hz, 1H, C12'Ha), 3.10–3.02 (m, 2H, C12Ha, C12'Hb), 2.68 (app-t,  $J = 12.0$  Hz, 1H, C12Hb), 2.19–2.08 (m, 1H, C17Ha), 2.04–1.97 (m, 1H, C17'Ha), 1.97–1.86 (m, 2H, C17Hb, C18Ha), 1.85–1.76 (m, 1H, C18Hb), 1.75–1.68 (m, 1H, C18'Ha), 1.68–1.59 (m, 1H, C18'Hb), 1.53–1.42 (m, 1H, C17'Hb).  $^{13}\text{C}$  NMR (MHz,  $\text{CD}_3\text{OD}$ , 20  $^\circ\text{C}$ ):  $\delta$  170.7 (C16'), 168.5 (C16), 168.0 (C13), 167.4 (C13'), 150.6 (C9), 136.9 (C9'), 135.3 (C6'), 134.2 (C4), 129.6 (C7), 128.5 (C4'), 126.2 (C2'), 125.2 (C5), 121.1 (C7'), 120.5 (C6), 116.3 (C5'), 112.6 (C8'), 111.1 (C8), 109.9 (C3'), 83.6 (C2), 61.9 (C15), 61.7 (C11), 60.8 (C3), 60.0 (C15'), 57.2 (C11'), 46.3 (C19), 46.0 (C19'), 41.1 (C12), 29.1 (2C, C12', C17'), 28.9 (C17), 23.8 (C18), 22.6 (C18').  $^{13}\text{C}$  NMR (MHz,  $\text{DMSO}-d_6$ , 20  $^\circ\text{C}$ ):  $\delta$  169.2 (C16'), 166.0 (C16), 165.6 (C13'), 165.3 (C13), 149.3 (C9), 134.8 (C9'), 134.1 (C6'), 133.0 (C4), 128.1 (C7), 127.1 (C4'), 124.8 (C2'), 123.8 (C5), 119.2 (C7'), 118.1 (C6), 114.6 (C5'), 111.4 (C8'), 109.6 (C3'), 109.5 (C8), 81.1 (C2), 60.1 (C11), 59.7 (C15), 58.7 (C3), 58.5 (C15'), 55.1 (C11'), 44.7 (2C, C19, C19'), 39.9 (C12), 27.7 (C17'), 27.4 (C17), 25.4 (C12'), 22.6 (C18), 22.0 (C18'). FTIR (thin film)  $\text{cm}^{-1}$ : 3310 (br-m), 2926 (m), 1661 (s), 1435 (s), 1301 (w), 1150 (w). HRMS (ESI) ( $m/z$ ): calc'd for  $\text{C}_{32}\text{H}_{33}\text{N}_6\text{O}_4$  [ $\text{M}+\text{H}$ ] $^+$ : 565.2558, found: 565.2551.  $[\alpha]_{\text{D}}^{24}$ :  $-180$  ( $c = 0.16$ ,  $\text{CH}_3\text{OH}$ ). TLC (80% acetone in dichloromethane), Rf: 0.11 (UV, CAM).

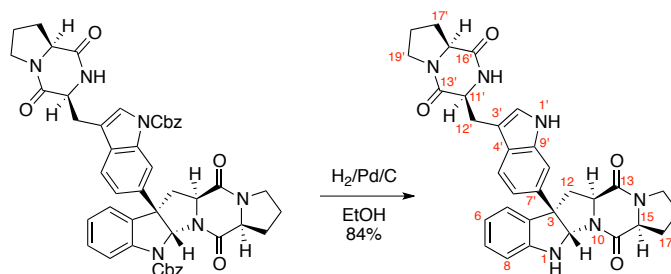

**(-)-iso-Nasesezine C (11):** Palladium on activated charcoal (6.5 mg, 6.1  $\mu\text{mol}$ , 20.0 mol%) was added to a solution of meta(-)-Nin,Nin'-dicarboxybenzyl iso-nasesezine C (-)-10 (25.2 mg, 30.3  $\mu\text{mol}$ , 1 equiv) in degassed ( $\text{N}_2$  stream, 5 min) ethanol (3 mL). A stream of hydrogen gas was passed through the heterogeneous mixture for 2 min by discharge of a balloon equipped with a needle extending into the reaction mixture. After stirring the reaction mixture at 22  $^\circ\text{C}$  for 64 h under an atmosphere of hydrogen gas, the solution was degassed ( $\text{N}_2$  stream, 5 min) and filtered over Celite. The filter cake was washed with methanol ( $3 \times 2$  mL) and the combined filtrates were concentrated under reduced pressure. The crude reaction mixture was purified by flash column chromatography on silica gel (eluent: 70  $\rightarrow$  90% acetone in dichloromethane) to afford (-)-11 (14.3 mg, 83.6%). Structural assignments were made using additional information from gCOSY, HSQC, HMBC and nOe experiments.

$^1\text{H}$  NMR (MHz,  $\text{CD}_3\text{OD}$ , 20  $^\circ\text{C}$ ):  $\delta$  7.49 (d,  $J = 8.4$  Hz, 1H, C5'H), 7.31 (d,  $J = 1.6$  Hz, 1H, C8'H), 7.11–7.01 (m, 2H, C5H, C6'H), 7.06 (s, 1H, C2'H), 7.05 (td,  $J = 1.1, 7.1$  Hz, 1H, C7H), 6.72 (td,  $J = 1.0, 7.5$  Hz, 1H, C6H), 6.70 (d,  $J = 7.7$  Hz, 1H, C8H), 5.64 (s, 1H, C2H), 4.35 (td,  $J = 1.8, 5.0$  Hz, 1H, C11'H), 4.21–4.15 (m, 2H, C11H, C15H), 3.92 (ddd,  $J = 1.9, 6.5, 11.0$  Hz, 1H, C15'H), 3.54–3.44 (m, 2H, C19H), 3.44–3.37 (m, 1H, C19'Ha), 3.26 (app-d,  $J = 4.5$  Hz, 2H, C12'H), 3.24–3.19 (m, 1H, C19'Hb), 3.05 (dd,  $J = 6.0, 12.6$  Hz, 1H, C12Ha), 2.85–2.78 (m, 1H, C12Hb), 2.29–2.21 (m, 1H, C17Ha), 2.08–1.97 (m, 2H, C17Hb, C18Ha), 1.95–1.85 (m, 2H, C17'Ha, C18Hb), 1.67–1.56 (m, 1H, C18'Ha), 1.46–1.30 (m, 1H, C18'Hb), 0.96–0.86 (m, 1H, C17'Hb).  $^1\text{H}$  NMR (MHz,  $\text{DMSO-d}_6$ , 20  $^\circ\text{C}$ ):  $\delta$  10.79 (d,  $J = 2.5$  Hz, 1H, N1'H), 7.68 (s, 1H, N10'H), 7.50 (d,  $J = 8.4$  Hz, 1H, C5'H), 7.23 (d,  $J = 1.6$  Hz, 1H, C8'H), 7.17 (d,  $J = 7.4$  Hz, 1H, C5H), 7.15 (d,  $J = 2.4$  Hz, 1H, C2'H), 7.08 (dd,  $J = 1.8, 8.3$  Hz, 1H, C6'H), 6.99 (app-t,  $J = 7.8$  Hz, 1H, C7H), 6.65 (d,  $J = 4.7$  Hz, 1H, C8H), 6.65 (s, 1H, N1H), 6.63 (d,  $J = 7.5$  Hz, 1H, C6H), 5.56 (s, 1H, C2H), 4.31 (ddd,  $J = 1.8, 6.9, 9.1$  Hz, 1H, C15H), 4.26 (app-t,  $J = 5.3$  Hz, 1H, C11'H), 4.17 (ddd,  $J = 3.2, 6.6, 10.1$  Hz, 1H, C11H), 4.05 (dd,  $J = 6.9, 9.7$  Hz, 1H, C15'H), 3.45–3.30 (m, 3H, C19'Ha, C19H), 3.25 (td,  $J = 4.3, 7.7, 8.3$  Hz, 1H, C19'Hb), 3.20 (app-dd,  $J = 4.9, 15.0$  Hz, 1H, C12'Ha), 3.03 (app-ddd,  $J = 6.1, 13.8, 21.2$  Hz, 2H, C12'Hb, C12Ha), 2.70–2.61 (m, 1H, C12Hb), 2.19–2.07 (m, 1H, C17'Ha), 2.01–1.86 (m, 3H, C17H, C18Ha), 1.86–1.73 (m, 1H, C18Hb), 1.73–1.63 (m, 1H, C18'Ha), 1.63–1.56 (m, 1H, C18'Hb), 1.46–1.35 (m, 1H, C17'Hb).  $^{13}\text{C}$  NMR (MHz,  $\text{CD}_3\text{OD}$ , 20  $^\circ\text{C}$ ):  $\delta$  170.8 (C16'), 168.5 (C16), 168.0 (C13), 167.4 (C13'), 150.6 (C9), 138.2 (C7'), 137.9 (C9'), 133.8 (C4), 129.7 (C7), 127.6 (C4'), 126.1 (C2'), 125.1 (C5), 120.4 (C5' or C6), 120.3 (C5' or C6), 118.0 (C6'), 111.1 (C8), 109.5 (C3'), 109.3 (C8'), 83.5 (C2), 61.8 (C11), 61.6 (C15), 60.7 (C3), 60.0 (C15'), 57.1 (C11'), 46.3 (C19), 46.0 (C19'), 40.9 (C12), 29.1 (C12' or C17'), 29.0 (C12' or C17'), 28.8 (C17), 23.8 (C18), 22.5 (C18').  $^{13}\text{C}$  NMR (MHz,  $\text{DMSO-d}_6$ , 20  $^\circ\text{C}$ ):  $\delta$  169.1 (C16'), 166.1 (C16), 165.5 (C13'), 165.3 (C13), 149.4 (C9), 136.8 (C7'), 135.9 (C9'), 132.4 (C4), 128.2 (C7), 126.1 (C4'), 124.8 (C2'), 124.0 (C5), 119.0 (C5'), 118.1 (C6), 116.4 (C6'), 109.5 (C8), 109.2 (C3'), 108.0 (C8'), 81.5 (C2), 60.2 (C11), 59.6 (C15), 58.8 (C3), 58.4 (C15'), 55.2 (C11'), 44.8 (C19 or C19'), 44.6 (C19 or C19'), 39.9 (C12), 27.6 (C17'), 27.4 (C17), 25.7 (C12'), 22.6 (C18), 21.9 (C18'). FTIR (thin film)  $\text{cm}^{-1}$ : 3310 (br-m), 2955 (w), 1653 (s), 1457 (m), 1340 (w), 1056 (w). HRMS (ESI) ( $m/z$ ): calc'd for  $\text{C}_{32}\text{H}_{33}\text{N}_6\text{O}_4$   $[\text{M}+\text{H}]^+$ : 565.2558, found: 565.2554.  $[\alpha]_{\text{D}}^{24}$ :  $-312$  ( $c = 0.42$ ,  $\text{CH}_3\text{OH}$ ). TLC (80% acetone in dichloromethane), Rf: 0.11 (UV, CAM).

**Supplementary Table 6.** Comparison of our  $^{13}\text{C}$  NMR data for (–)-naseeseazine C (**4**) and (–)-*iso*-naseeseazine C (**11**) with literature data ( $\text{CD}_3\text{OD}$ ).<sup>1</sup>

| Assignment | Wang Report <sup>1</sup><br><i>iso</i> -naseeseazine B<br>$^{13}\text{C}$ NMR, 150 MHz, $\text{CD}_3\text{OD}$ | This Work<br>(–)-naseeseazine C ( <b>4</b> )<br>$^{13}\text{C}$ NMR, 125 MHz, $\text{CD}_3\text{OD}$ , 20 °C | This Work<br>(–)- <i>iso</i> -naseeseazine C ( <b>11</b> )<br>$^{13}\text{C}$ NMR, 125 MHz $\text{CD}_3\text{OD}$ , 20 °C | Chemical Shift Difference $\Delta\delta = \delta$ (–)-naseeseazine C (this work) – $\delta$ (Wang report) <sup>1</sup> | Chemical Shift Difference $\Delta\delta = \delta$ (–)- <i>iso</i> -naseeseazine C (this work) – $\delta$ (Wang report) <sup>1</sup> |
|------------|----------------------------------------------------------------------------------------------------------------|--------------------------------------------------------------------------------------------------------------|---------------------------------------------------------------------------------------------------------------------------|------------------------------------------------------------------------------------------------------------------------|-------------------------------------------------------------------------------------------------------------------------------------|
| C2         | 83.6                                                                                                           | 83.6                                                                                                         | 83.5                                                                                                                      | 0                                                                                                                      | –0.1                                                                                                                                |
| C3         | 60.8                                                                                                           | 60.8                                                                                                         | 60.7                                                                                                                      | 0                                                                                                                      | –0.1                                                                                                                                |
| C4         | 134.2                                                                                                          | 134.2                                                                                                        | 133.8                                                                                                                     | 0                                                                                                                      | –0.4                                                                                                                                |
| C5         | 125.2                                                                                                          | 125.2                                                                                                        | 125.1                                                                                                                     | 0                                                                                                                      | –0.1                                                                                                                                |
| C6         | 120.5                                                                                                          | 120.5                                                                                                        | 120.4 or 120.3                                                                                                            | 0                                                                                                                      | –0.1 or –0.2                                                                                                                        |
| C7         | 129.7                                                                                                          | 129.6                                                                                                        | 129.7                                                                                                                     | –0.1                                                                                                                   | 0                                                                                                                                   |
| C8         | 111.2                                                                                                          | 111.1                                                                                                        | 111.1                                                                                                                     | –0.1                                                                                                                   | –0.1                                                                                                                                |
| C9         | 150.6                                                                                                          | 150.6                                                                                                        | 150.6                                                                                                                     | 0                                                                                                                      | 0                                                                                                                                   |
| C11        | 62.0                                                                                                           | 61.9                                                                                                         | 61.8                                                                                                                      | –0.1                                                                                                                   | –0.2                                                                                                                                |
| C12        | 41.1                                                                                                           | 41.1                                                                                                         | 40.9                                                                                                                      | 0                                                                                                                      | –0.2                                                                                                                                |
| C13        | 168.1                                                                                                          | 168.0                                                                                                        | 168.0                                                                                                                     | –0.1                                                                                                                   | –0.1                                                                                                                                |
| C15        | 61.7                                                                                                           | 61.9                                                                                                         | 61.6                                                                                                                      | 0.2                                                                                                                    | –0.1                                                                                                                                |
| C16        | 168.6                                                                                                          | 168.5                                                                                                        | 168.5                                                                                                                     | –0.1                                                                                                                   | –0.1                                                                                                                                |
| C17        | 28.9                                                                                                           | 28.9                                                                                                         | 28.8                                                                                                                      | 0                                                                                                                      | –0.1                                                                                                                                |
| C18        | 23.9                                                                                                           | 23.8                                                                                                         | 23.8                                                                                                                      | –0.1                                                                                                                   | –0.1                                                                                                                                |
| C19        | 46.4                                                                                                           | 46.3                                                                                                         | 46.3                                                                                                                      | –0.1                                                                                                                   | –0.1                                                                                                                                |
| C2'        | 126.3                                                                                                          | 126.2                                                                                                        | 126.1                                                                                                                     | –0.1                                                                                                                   | –0.2                                                                                                                                |
| C3'        | 109.8                                                                                                          | 109.9                                                                                                        | 109.5                                                                                                                     | 0.1                                                                                                                    | –0.3                                                                                                                                |
| C4'        | 128.5                                                                                                          | 128.5                                                                                                        | 127.6                                                                                                                     | 0                                                                                                                      | –0.9                                                                                                                                |
| C5'        | 112.6                                                                                                          | 116.3                                                                                                        | 120.4 or 120.3                                                                                                            | 3.7*                                                                                                                   | 7.8 or 7.7                                                                                                                          |
| C6'        | 121.1                                                                                                          | 135.3                                                                                                        | 118.0                                                                                                                     | 14.2                                                                                                                   | –3.1                                                                                                                                |
| C7'        | 135.3                                                                                                          | 121.1                                                                                                        | 138.2                                                                                                                     | –14.2                                                                                                                  | 2.9                                                                                                                                 |
| C8'        | 116.3                                                                                                          | 112.6                                                                                                        | 109.3                                                                                                                     | –3.7                                                                                                                   | –7.0                                                                                                                                |
| C9'        | 136.9                                                                                                          | 136.9                                                                                                        | 137.9                                                                                                                     | 0                                                                                                                      | 1.0                                                                                                                                 |
| C11'       | 57.3                                                                                                           | 57.2                                                                                                         | 57.1                                                                                                                      | –0.1                                                                                                                   | –0.2                                                                                                                                |
| C12'       | 29.3                                                                                                           | 29.1                                                                                                         | 29.1 or 29.0                                                                                                              | –0.2                                                                                                                   | –0.2 or –0.3                                                                                                                        |
| C13'       | 167.4                                                                                                          | 167.4                                                                                                        | 167.4                                                                                                                     | 0                                                                                                                      | 0                                                                                                                                   |
| C15'       | 60.1                                                                                                           | 60.0                                                                                                         | 60.0                                                                                                                      | –0.1                                                                                                                   | 0.1                                                                                                                                 |
| C16'       | 170.7                                                                                                          | 170.7                                                                                                        | 170.8                                                                                                                     | 0                                                                                                                      | 0.1                                                                                                                                 |
| C17'       | 29.1                                                                                                           | 29.1                                                                                                         | 29.1 or 29.0                                                                                                              | 0                                                                                                                      | 0 or –0.1                                                                                                                           |
| C18'       | 22.5                                                                                                           | 22.6                                                                                                         | 22.5                                                                                                                      | 0.1                                                                                                                    | 0                                                                                                                                   |
| C19'       | 46.03                                                                                                          | 46.0                                                                                                         | 46.0                                                                                                                      | 0                                                                                                                      | 0                                                                                                                                   |

The comparison of the  $^1\text{H}$  and  $^{13}\text{C}$  NMR chemical shifts of the reported *isonaseeseazine* B with both synthetic regioisomers (–)-**4** and (–)-**11** in  $\text{CD}_3\text{OD}$  shows that the data for *isonaseeseazine* B is most consistent with synthetic (–)-naseeseazine C (**4**).

\* Our assignment of these residues is supported by key HSQC and HMBC correlations

**Supplementary Table 7.** Comparison of our  $^{13}\text{C}$  NMR data for (–)-nasezeazine C (4) and (–)-iso-nasezeazine C (11) with literature data (DMSO- $d_6$ ).<sup>2</sup>

| Assignment | Carroll Report <sup>2</sup><br>nasezeazine C<br>13C NMR, 200<br>MHz, DMSO- $d_6$ | This Work<br>(–)-nasezeazine<br>C (4) 13C NMR,<br>125 MHz | This Work<br>(–)-iso-<br>nasezeazine C<br>(11) 13C NMR,<br>125 MHz | Chemical Shift<br>Difference<br>$\Delta\delta = \delta$ (–)-<br>nasezeazine C (this<br>work) – $\delta$ (Carroll<br>report) <sup>2</sup> DMSO- $d_6$ ,<br>20 °C | Chemical Shift<br>Difference<br>$\Delta\delta = \delta$ (–)-iso-<br>nasezeazine C (this work)<br>– $\delta$ (Carroll report) <sup>2</sup><br>DMSO- $d_6$ , 20 °C |
|------------|----------------------------------------------------------------------------------|-----------------------------------------------------------|--------------------------------------------------------------------|-----------------------------------------------------------------------------------------------------------------------------------------------------------------|------------------------------------------------------------------------------------------------------------------------------------------------------------------|
| C2         | 81.1                                                                             | 81.1                                                      | 81.5                                                               | 0                                                                                                                                                               | –0.4                                                                                                                                                             |
| C3         | 59.7                                                                             | 58.7                                                      | 58.8                                                               | –1.0*                                                                                                                                                           | 0.9                                                                                                                                                              |
| C4         | 134.1                                                                            | 133                                                       | 132.4                                                              | –1.1                                                                                                                                                            | 1.7                                                                                                                                                              |
| C5         | 125.8                                                                            | 123.8                                                     | 124                                                                | –2.0                                                                                                                                                            | 1.8                                                                                                                                                              |
| C6         | 118.1                                                                            | 118.1                                                     | 118.1                                                              | 0                                                                                                                                                               | 0                                                                                                                                                                |
| C7         | 128.1                                                                            | 128.1                                                     | 128.2                                                              | 0                                                                                                                                                               | –0.1                                                                                                                                                             |
| C8         | 111.4                                                                            | 109.5                                                     | 109.5                                                              | –1.9                                                                                                                                                            | 1.9                                                                                                                                                              |
| C9         | 149.3                                                                            | 149.3                                                     | 149.4                                                              | 0                                                                                                                                                               | –0.1                                                                                                                                                             |
| C11        | 60.1                                                                             | 60.1                                                      | 60.2                                                               | 0                                                                                                                                                               | –0.1                                                                                                                                                             |
| C12        | 40                                                                               | 39.9                                                      | 39.9                                                               | –0.1                                                                                                                                                            | 0.1                                                                                                                                                              |
| C13        | 165.3                                                                            | 165.3                                                     | 165.3                                                              | 0                                                                                                                                                               | 0                                                                                                                                                                |
| C15        | 58.5                                                                             | 59.7                                                      | 59.6                                                               | 1.2                                                                                                                                                             | –1.1                                                                                                                                                             |
| C16        | 169.1                                                                            | 166                                                       | 166.1                                                              | –3.1                                                                                                                                                            | 3                                                                                                                                                                |
| C17        | 27.4                                                                             | 27.4                                                      | 27.4                                                               | 0                                                                                                                                                               | 0                                                                                                                                                                |
| C18        | 22.5                                                                             | 22.6                                                      | 22.6                                                               | 0.1                                                                                                                                                             | –0.1                                                                                                                                                             |
| C19        | 44.7                                                                             | 44.7                                                      | 44.8 or 44.6                                                       | 0                                                                                                                                                               | 0.1 or –0.1                                                                                                                                                      |
| C2'        | 124.8                                                                            | 124.8                                                     | 124.8                                                              | 0                                                                                                                                                               | 0                                                                                                                                                                |
| C3'        | 109.6                                                                            | 109.6                                                     | 109.2                                                              | 0                                                                                                                                                               | 0.4                                                                                                                                                              |
| C4'        | 127.1                                                                            | 127.1                                                     | 126.1                                                              | 0                                                                                                                                                               | 1                                                                                                                                                                |
| C5'        | 114.6                                                                            | 114.6                                                     | 119                                                                | 0                                                                                                                                                               | –4.4                                                                                                                                                             |
| C6'        | 134.8                                                                            | 134.1                                                     | 116.4                                                              | –0.7                                                                                                                                                            | 18.4                                                                                                                                                             |
| C7'        | 119.2                                                                            | 119.2                                                     | 136.8                                                              | 0                                                                                                                                                               | –17.6                                                                                                                                                            |
| C8'        | 110.4                                                                            | 111.4                                                     | 108                                                                | 1.0                                                                                                                                                             | 2.4                                                                                                                                                              |
| C9'        | 135.9                                                                            | 134.8                                                     | 135.9                                                              | –1.1                                                                                                                                                            | 0                                                                                                                                                                |
| C11'       | 55.1                                                                             | 55.1                                                      | 55.2                                                               | 0                                                                                                                                                               | –0.1                                                                                                                                                             |
| C12'       | 25.4                                                                             | 25.4                                                      | 25.7                                                               | 0                                                                                                                                                               | –0.3                                                                                                                                                             |
| C13'       | 166                                                                              | 165.6                                                     | 165.5                                                              | –0.4                                                                                                                                                            | 0.5                                                                                                                                                              |
| C15'       | 58.8                                                                             | 58.5                                                      | 58.4                                                               | –0.3                                                                                                                                                            | 0.4                                                                                                                                                              |
| C16'       | 165.6                                                                            | 169.2                                                     | 169.1                                                              | 3.6                                                                                                                                                             | –3.5                                                                                                                                                             |
| C17'       | 27.7                                                                             | 27.7                                                      | 27.6                                                               | 0                                                                                                                                                               | 0.1                                                                                                                                                              |
| C18'       | 21.9                                                                             | 22                                                        | 21.9                                                               | 0.1                                                                                                                                                             | 0                                                                                                                                                                |
| C19'       | 44.7                                                                             | 44.7                                                      | 44.8 or 44.6                                                       | 0                                                                                                                                                               | 0.1 or –0.1                                                                                                                                                      |

The comparison of the  $^1\text{H}$  and  $^{13}\text{C}$  NMR chemical shifts of the reported nasezeazine C with both synthetic regioisomers (–)-4 and (–)-11 in DMSO- $d_6$  shows that the data for nasezeazine C is most consistent with synthetic (–)-nasezeazine C (4).

\* Our assignment of these residues is supported by key HSQC and HMBC correlations

### **Synthetic References:**

1. Xiong, Z. Q.; Liu, Q. X.; Pan, Z. L.; Zhao, N.; Feng, Z. X.; Wang, Y., Diversity and bioprospecting of culturable actinomycetes from marine sediment of the Yellow Sea, China. *Arch. Microbiol.* 2015, 197 (2), 299-309.
2. Buedenbender, L.; Grkovic, T.; Duffy, S.; Kurtboke, D. I.; Avery, V. M.; Carroll, A. R., Naseseazine C, a new anti-plasmodial dimeric diketopiperazine from a marine sediment derived *Streptomyces* sp. *Tet. Lett.* 2016, 57 (52), 5893-5895.



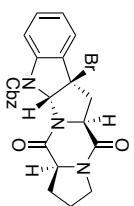

$^1\text{H NMR}$ , 400 MHz,  $\text{CDCl}_3$ , 20 °C

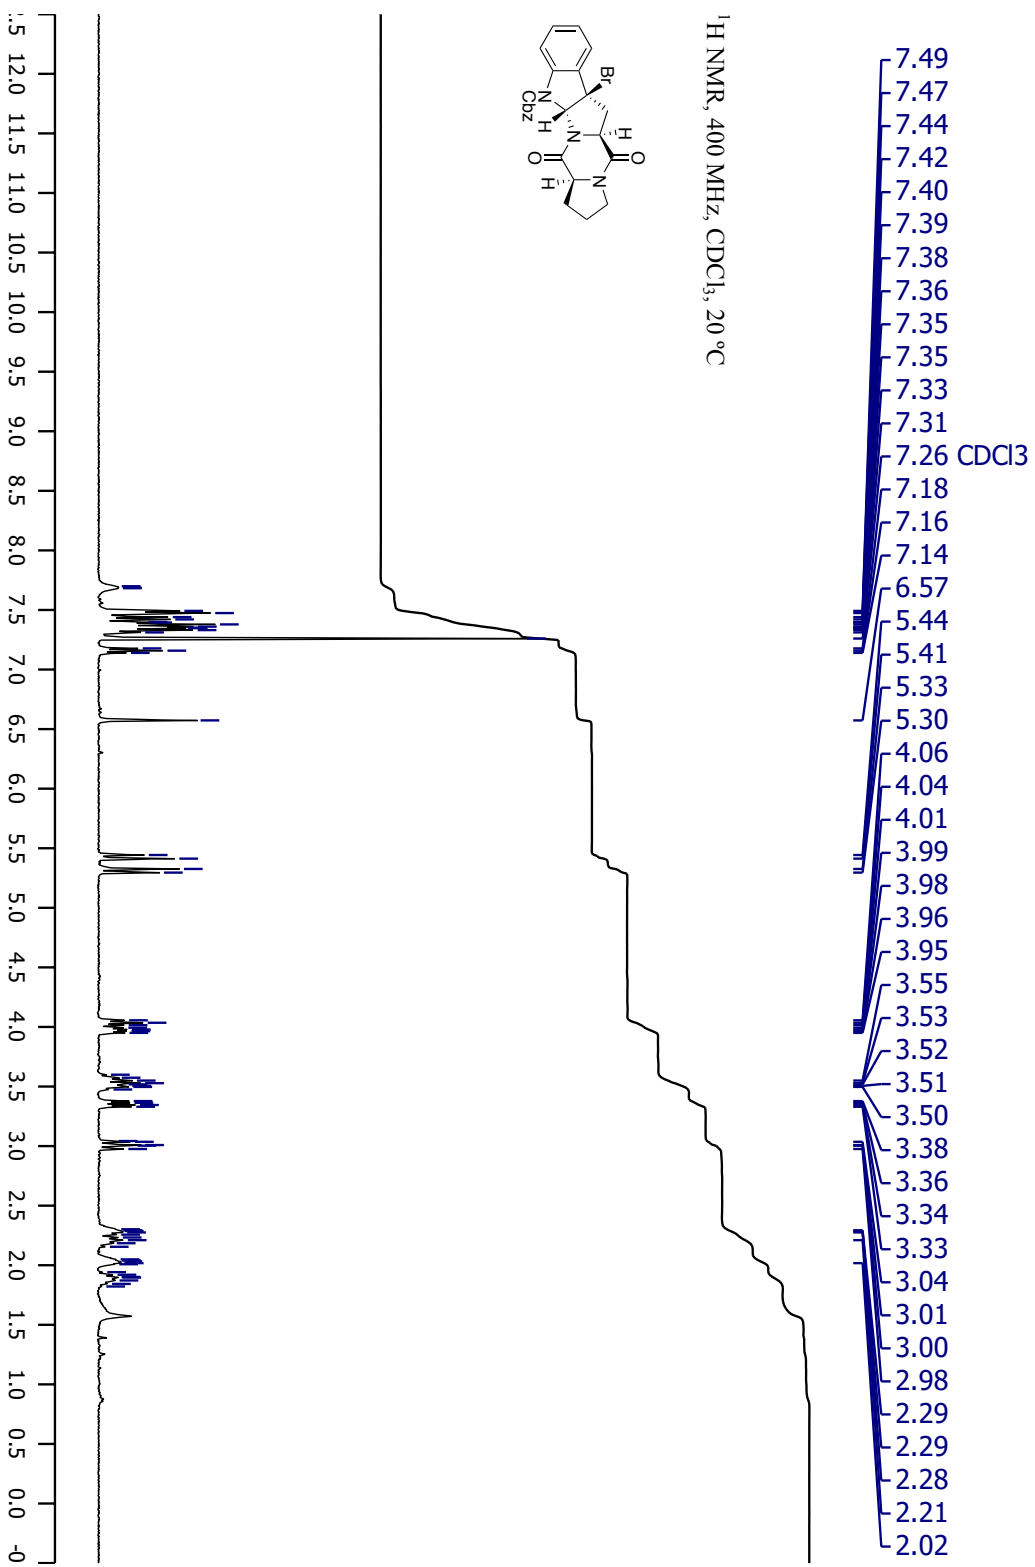

$^{13}\text{C}$  NMR, 100 MHz,  $\text{CDCl}_3$ , 20 °C

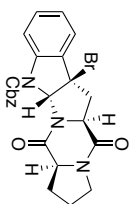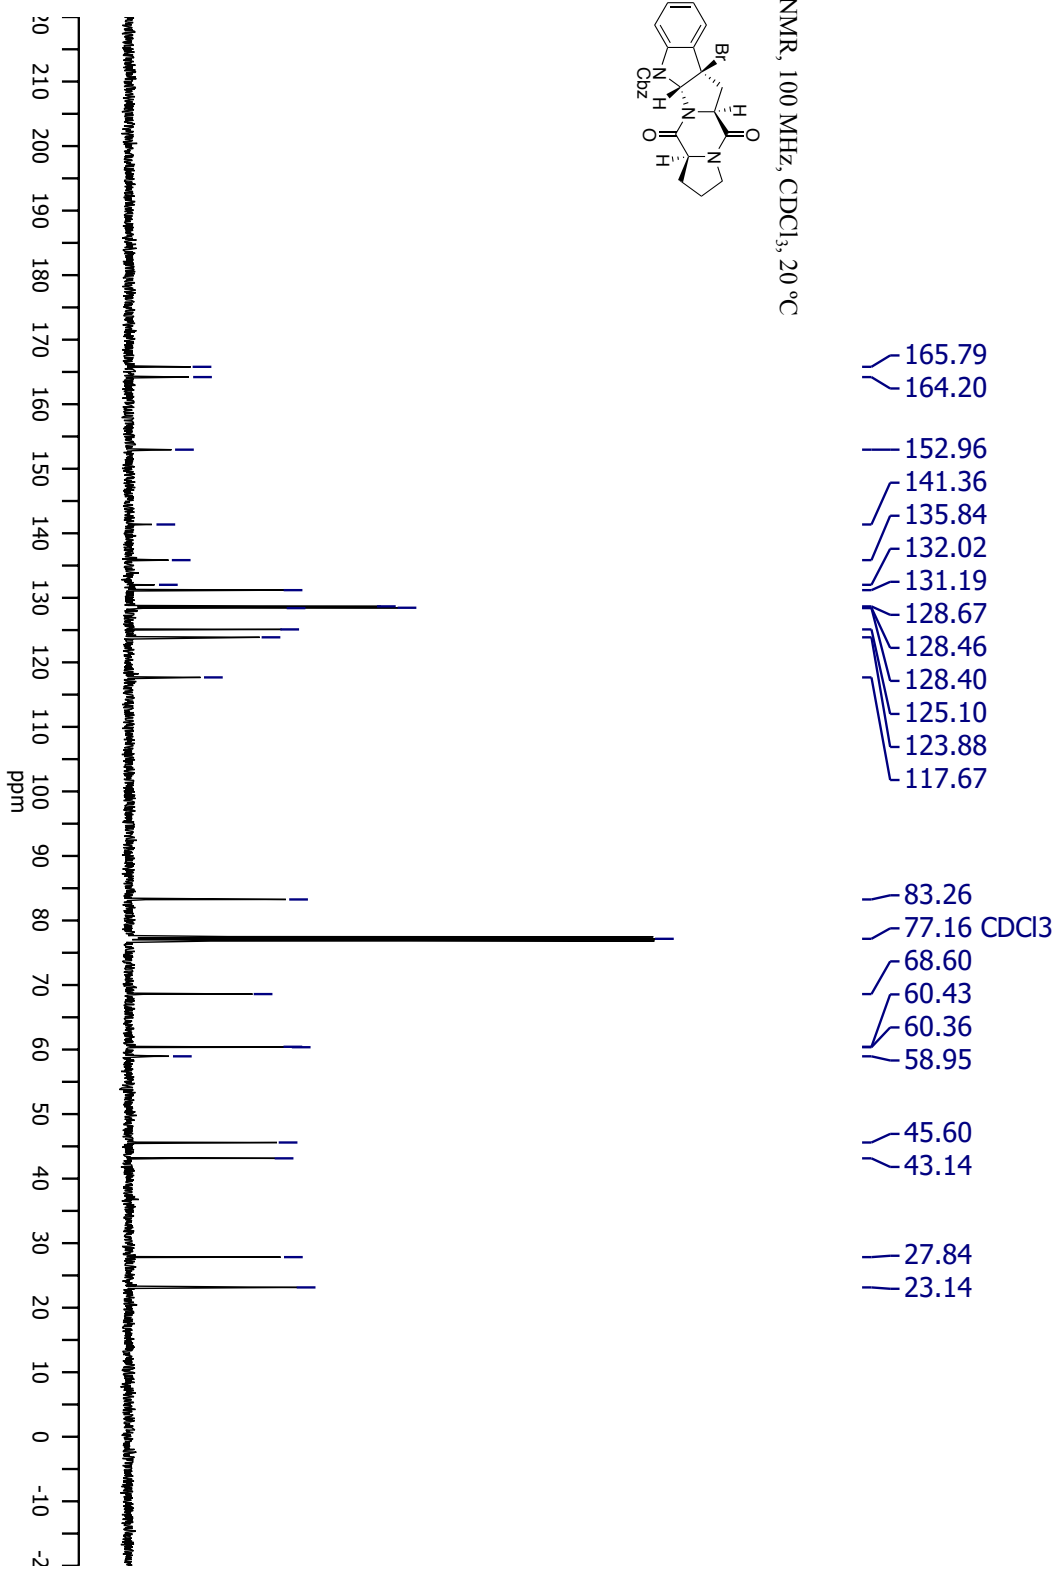

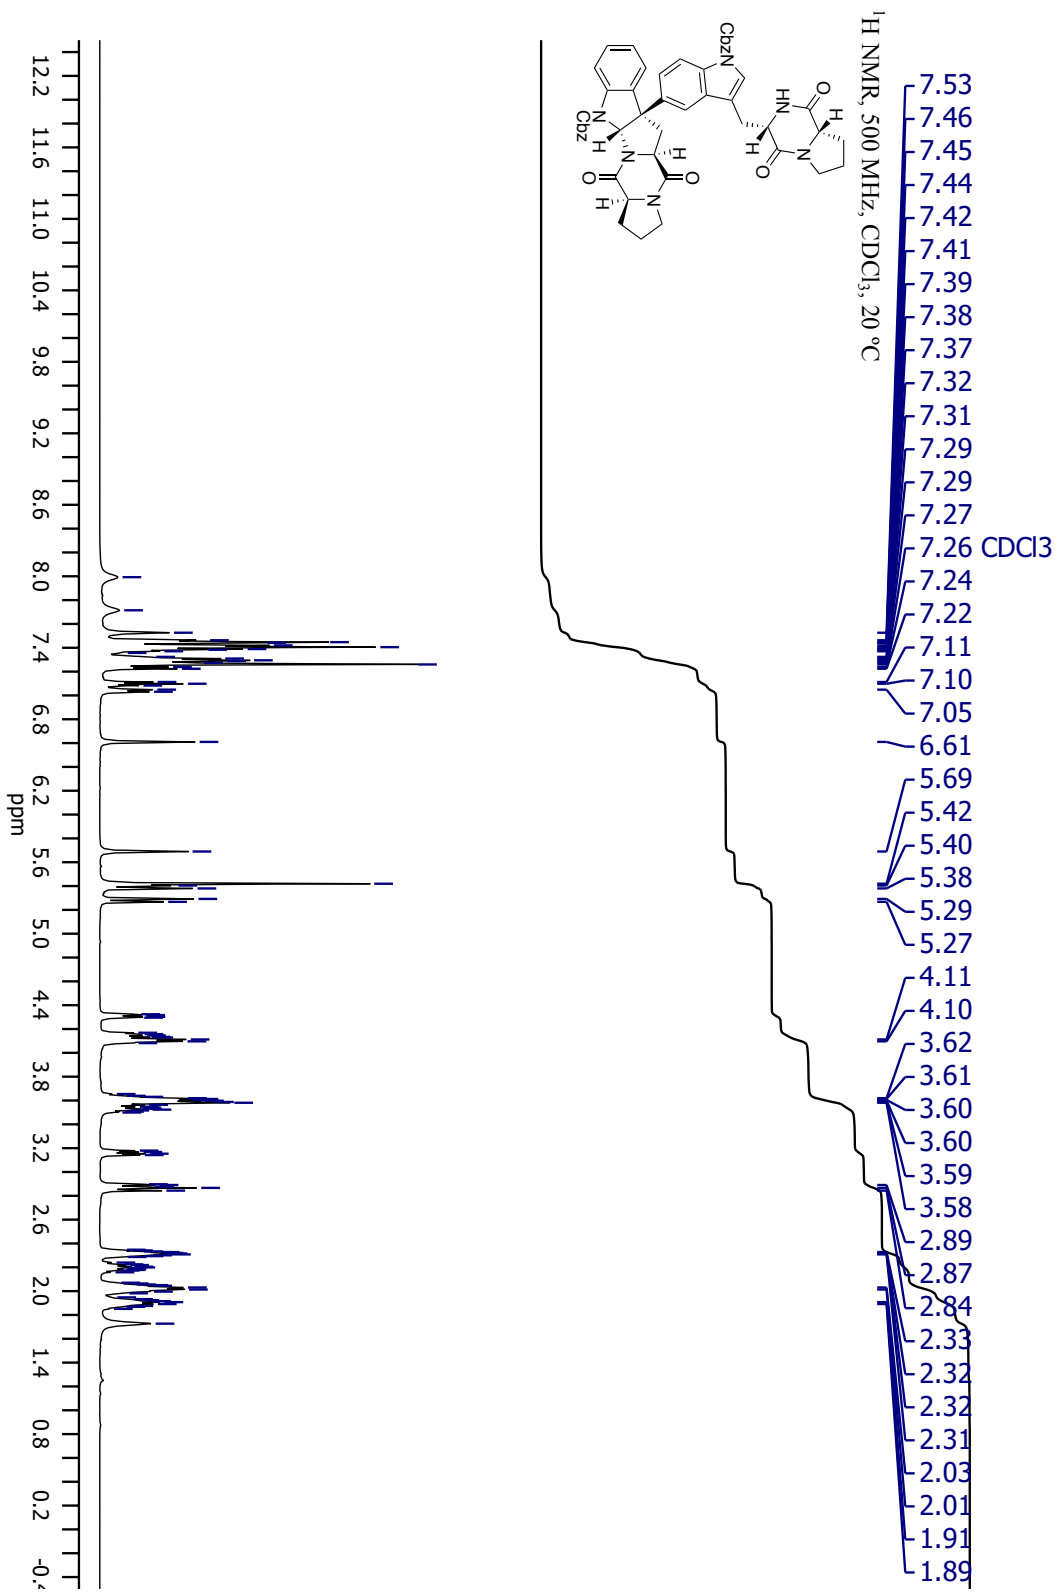

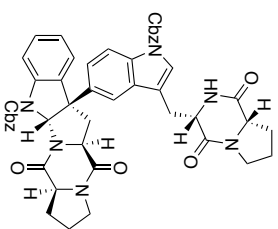

$^{13}\text{C}$  NMR, 125 MHz,  $\text{CDCl}_3$ , 20 °C

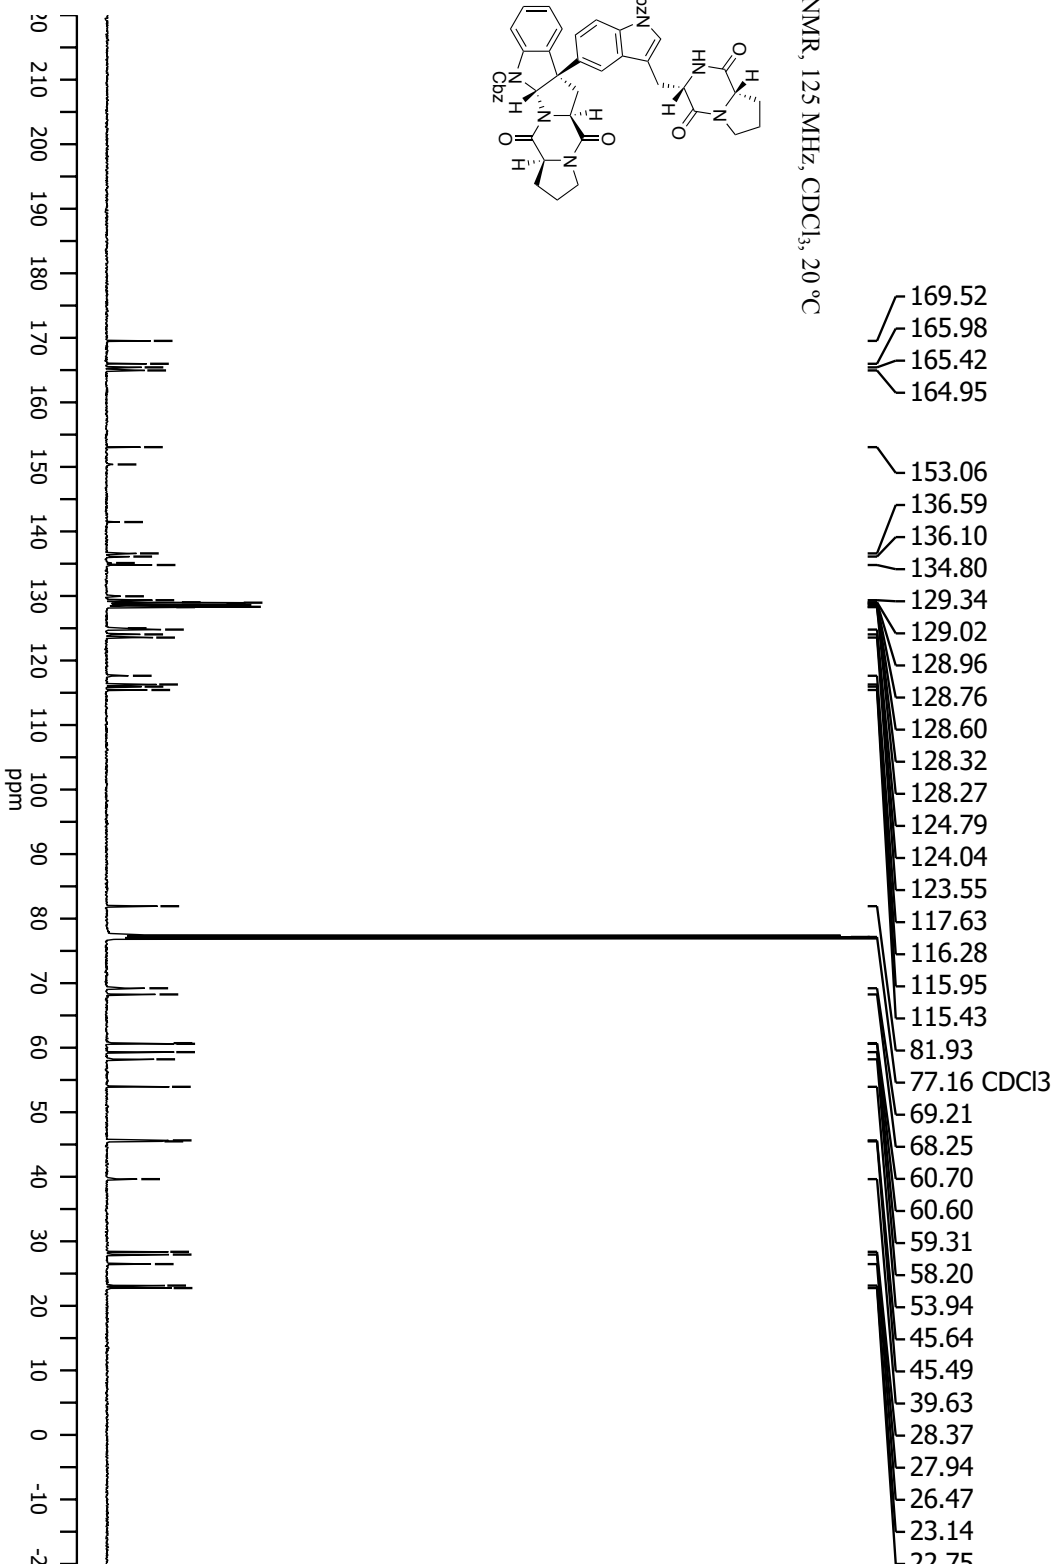



$^{13}\text{C}$  NMR, 125 MHz,  $\text{CDCl}_3$ , 20 °C

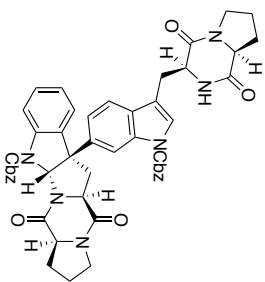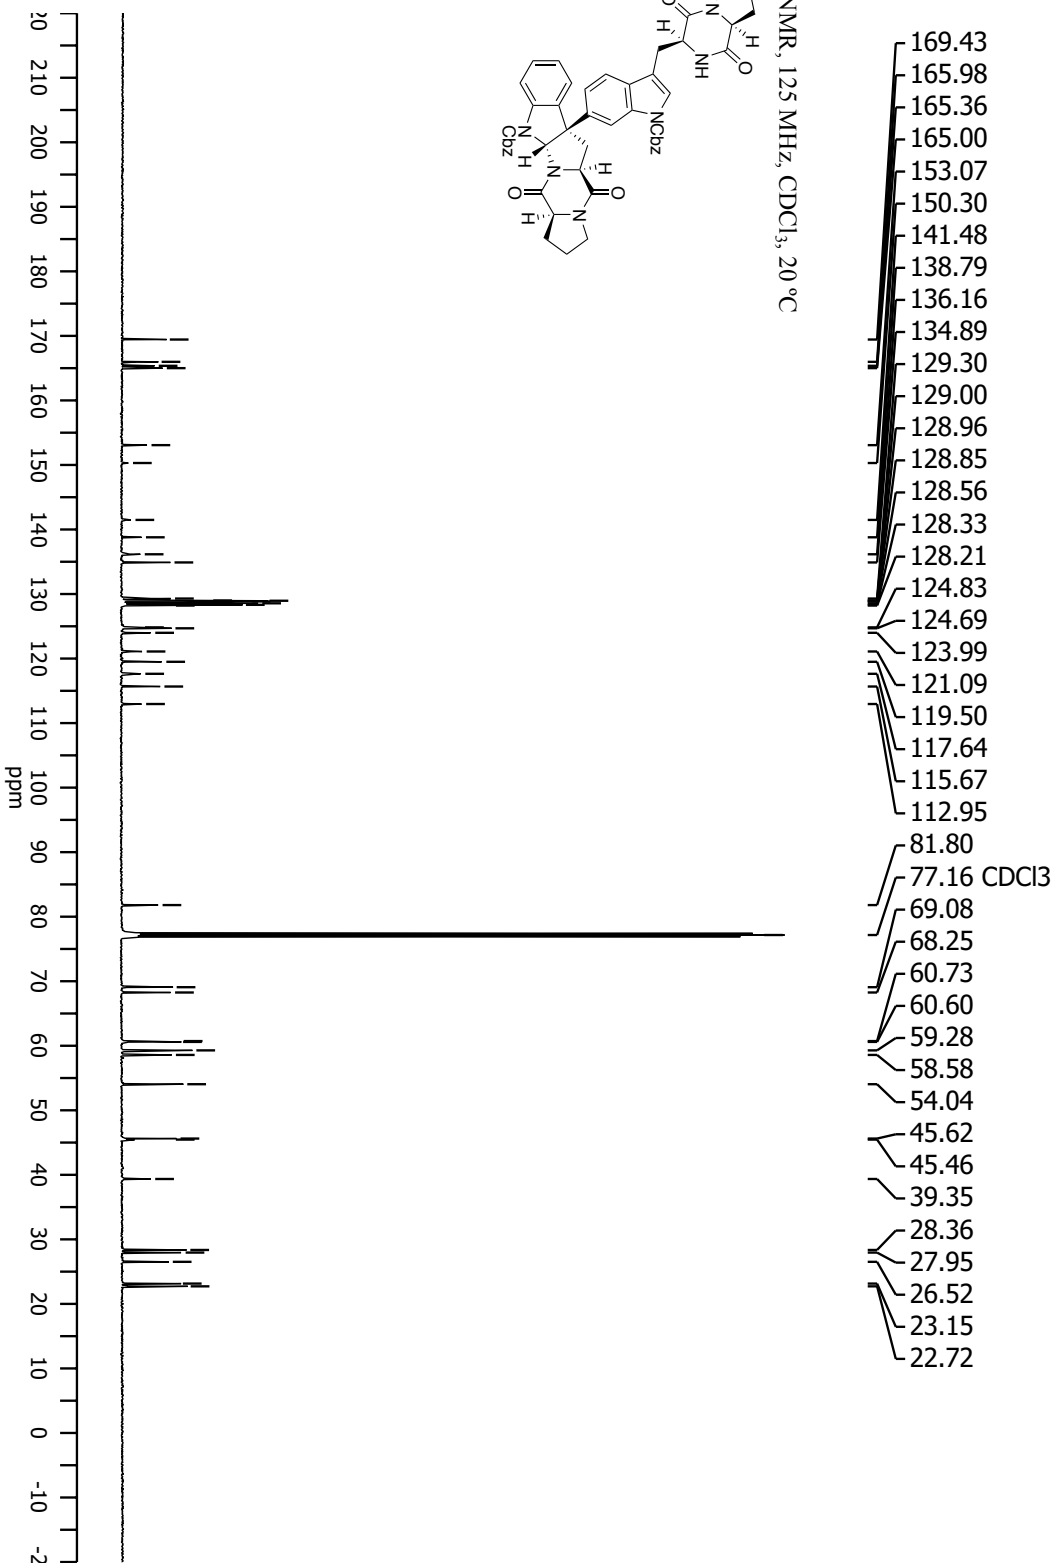

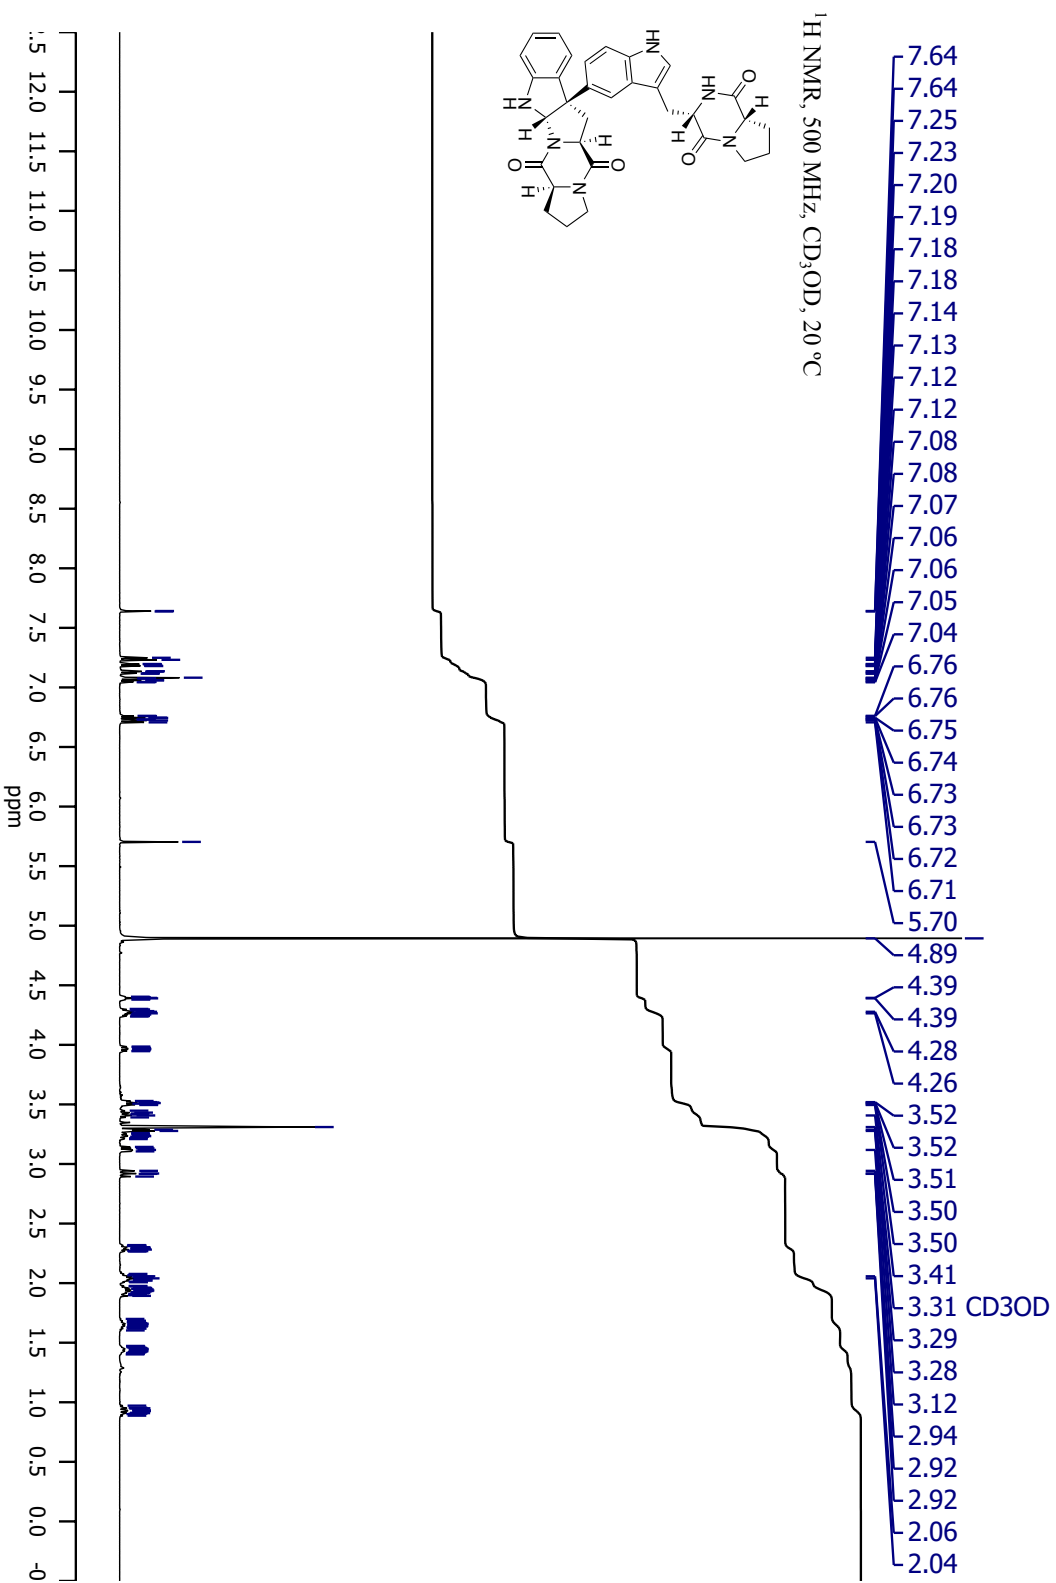

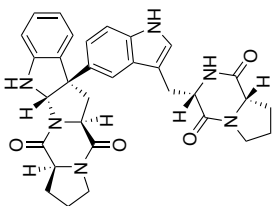

$^{13}\text{C}$  NMR, 125 MHz,  $\text{CD}_3\text{OD}$ , 20 °C

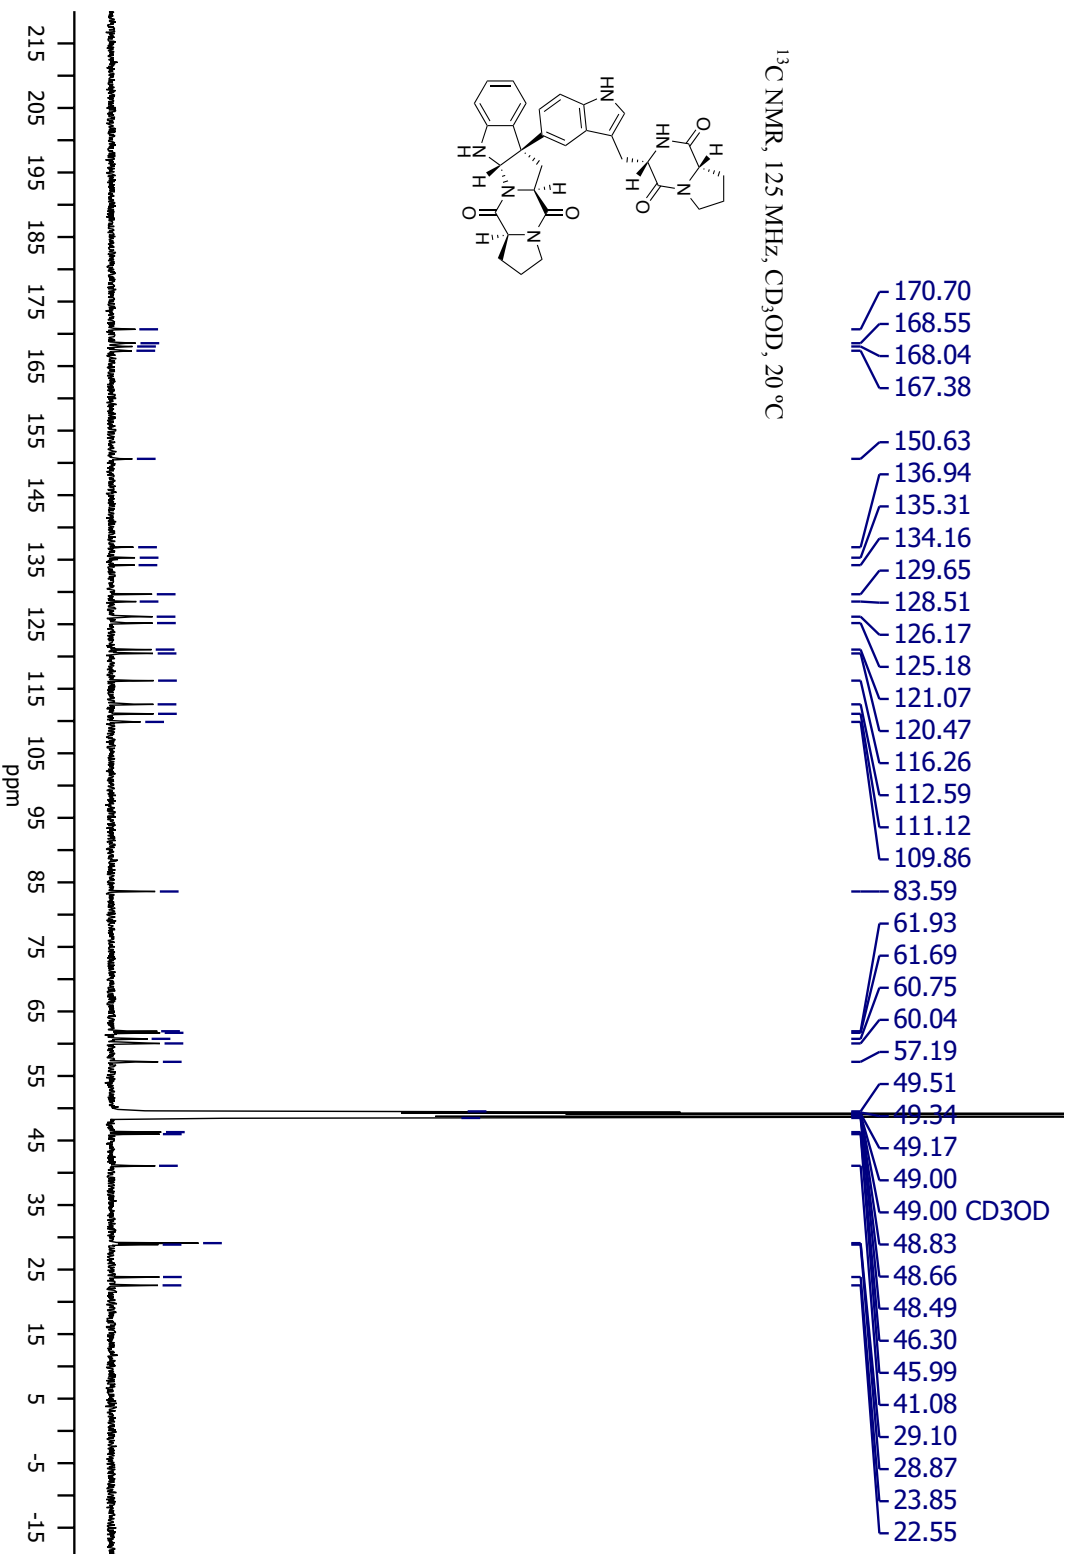



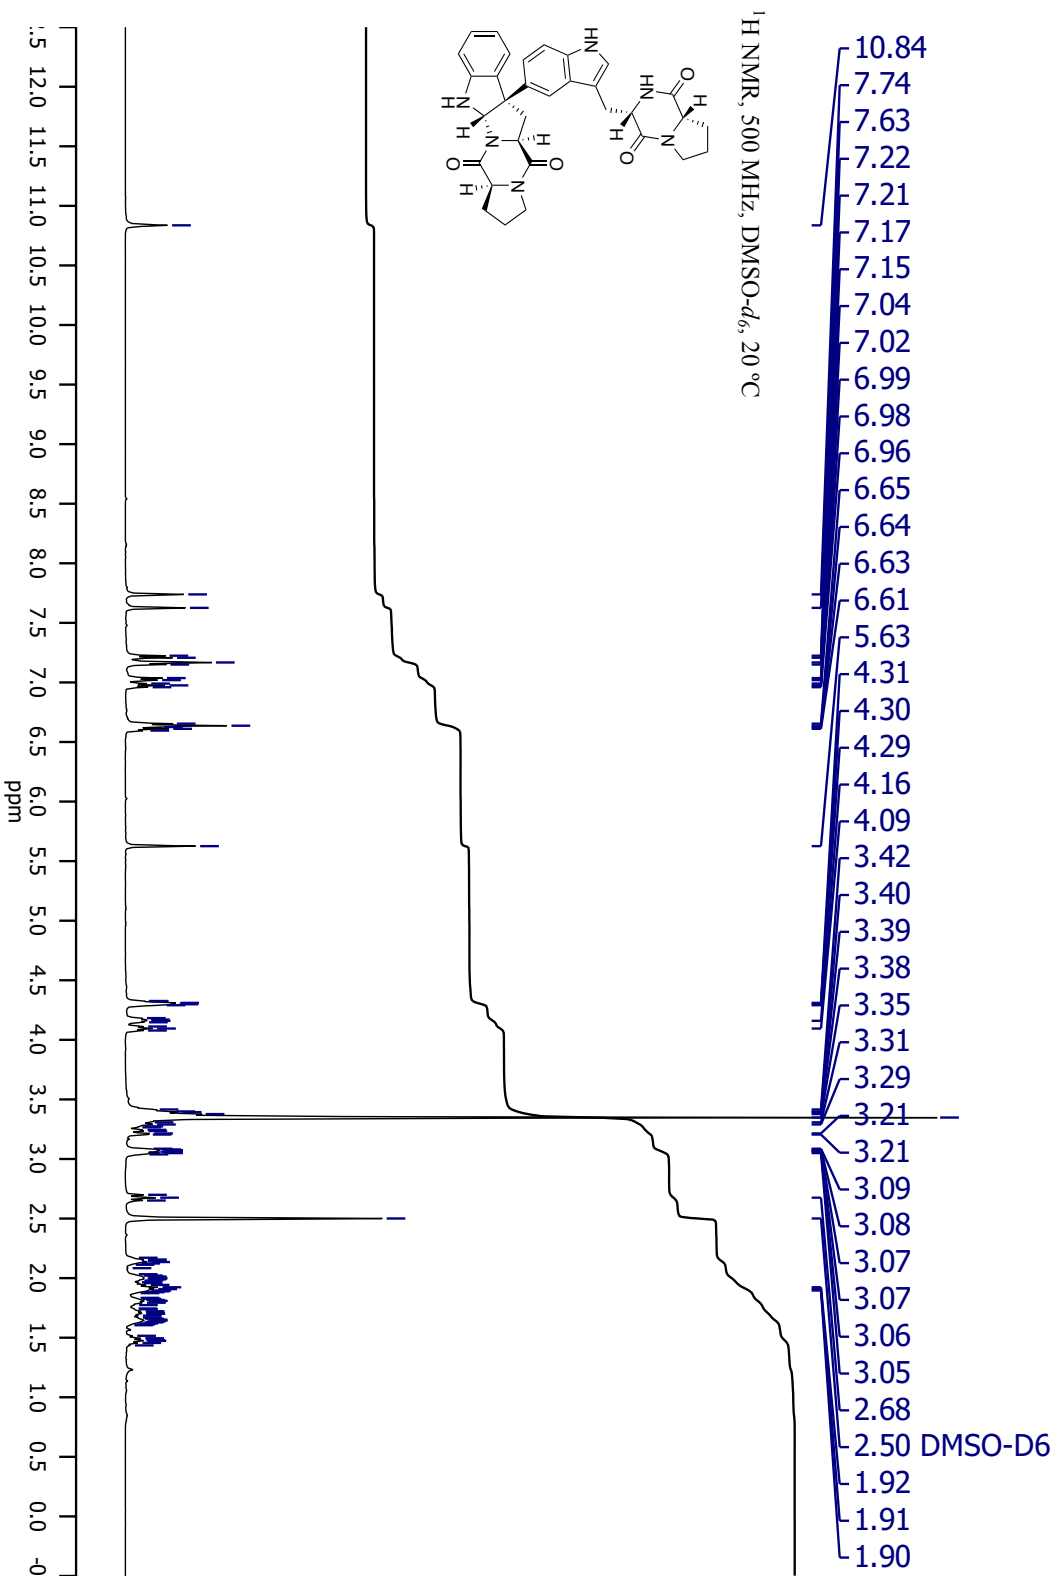

$^{13}\text{C}$  NMR, 125 MHz, DMSO-*d*<sub>6</sub>, 20 °C

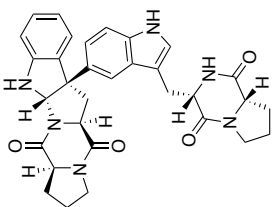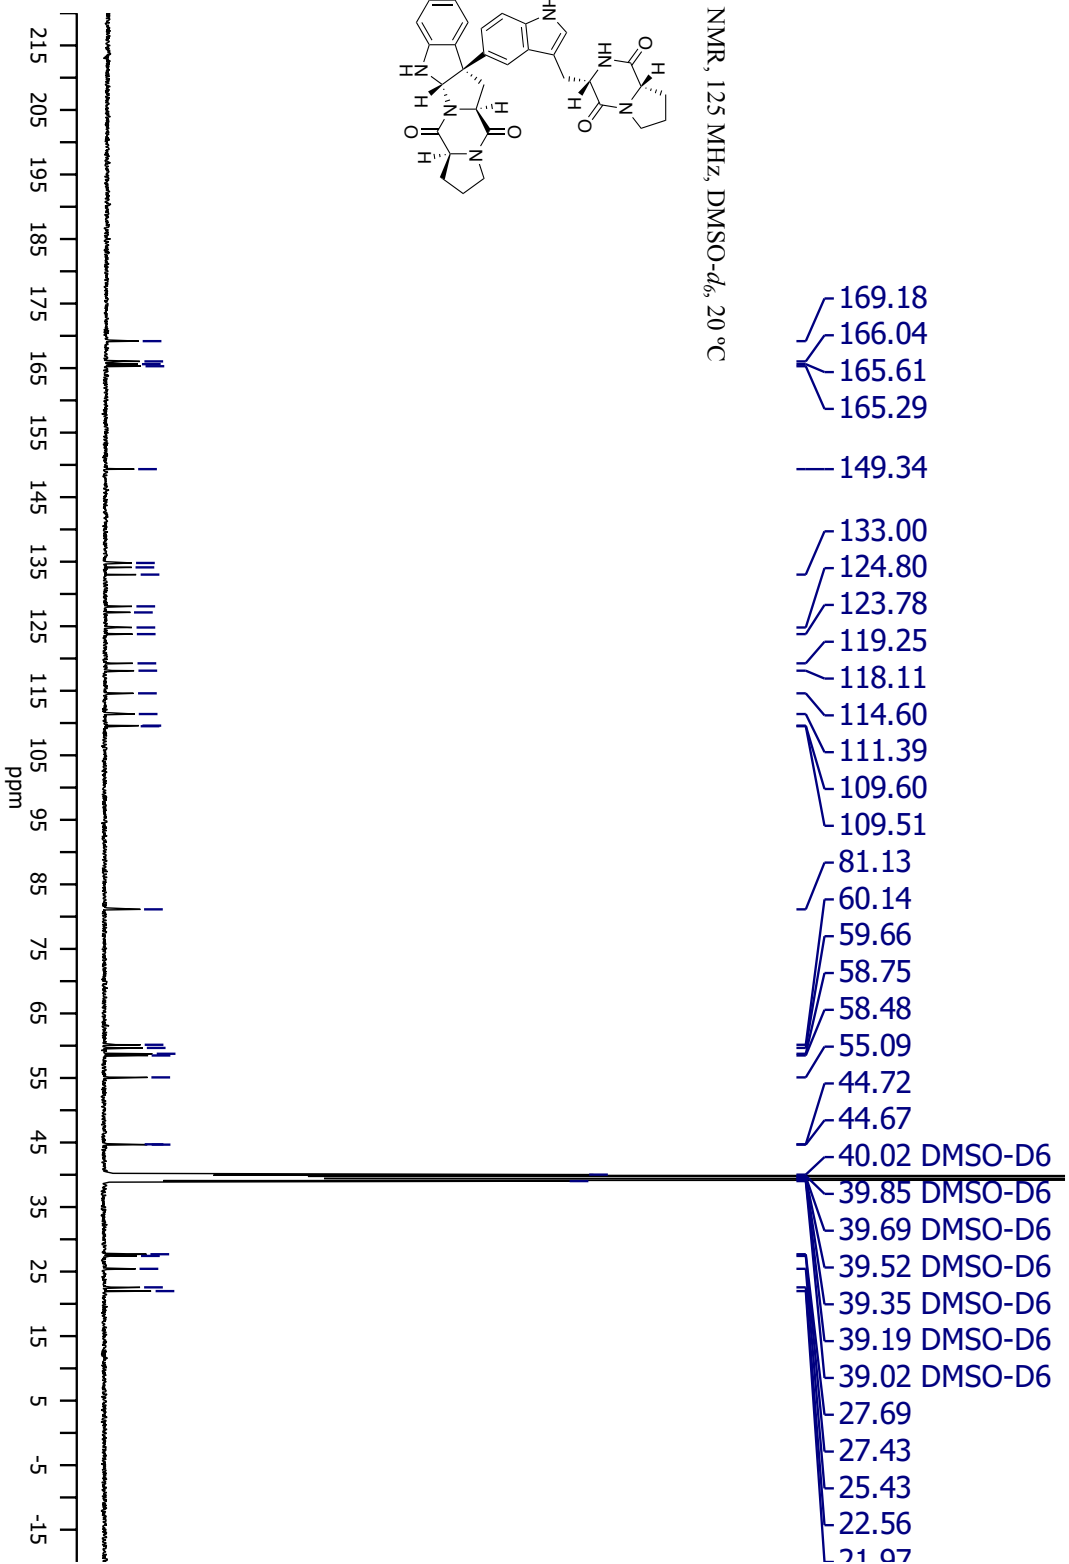

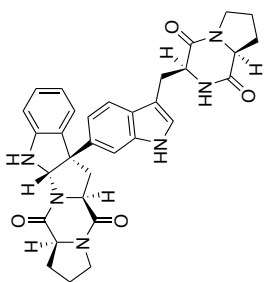

$^1\text{H NMR}$ , 500 MHz,  $\text{CD}_3\text{OD}$ , 20 °C

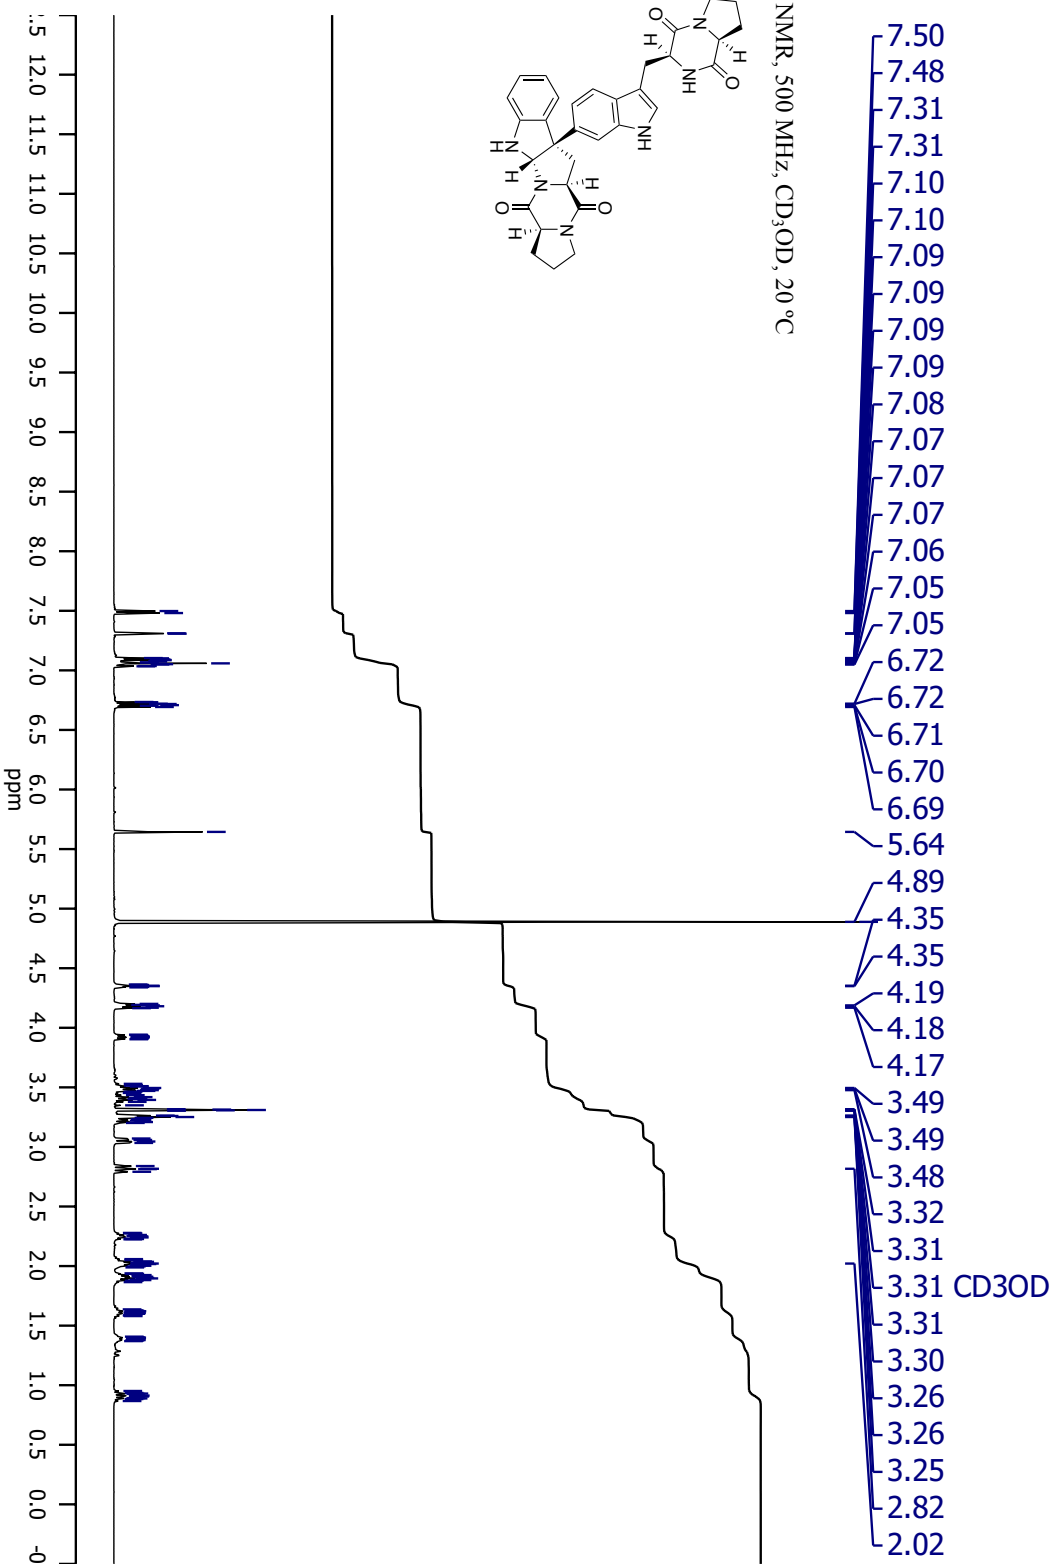

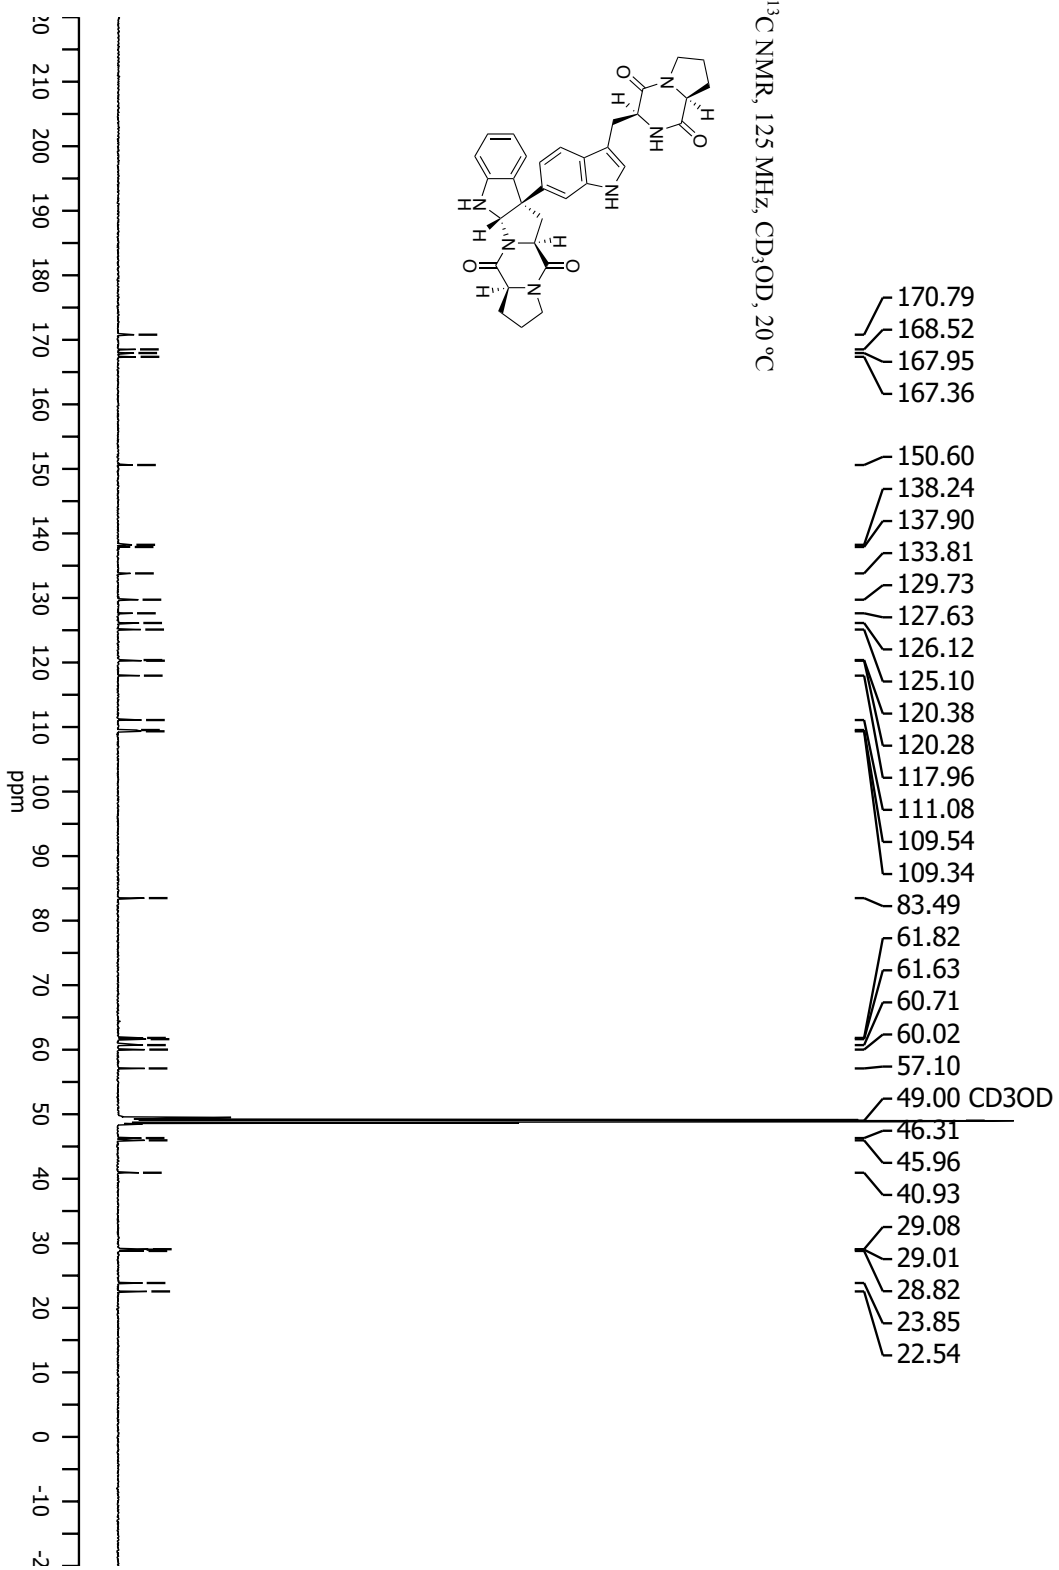

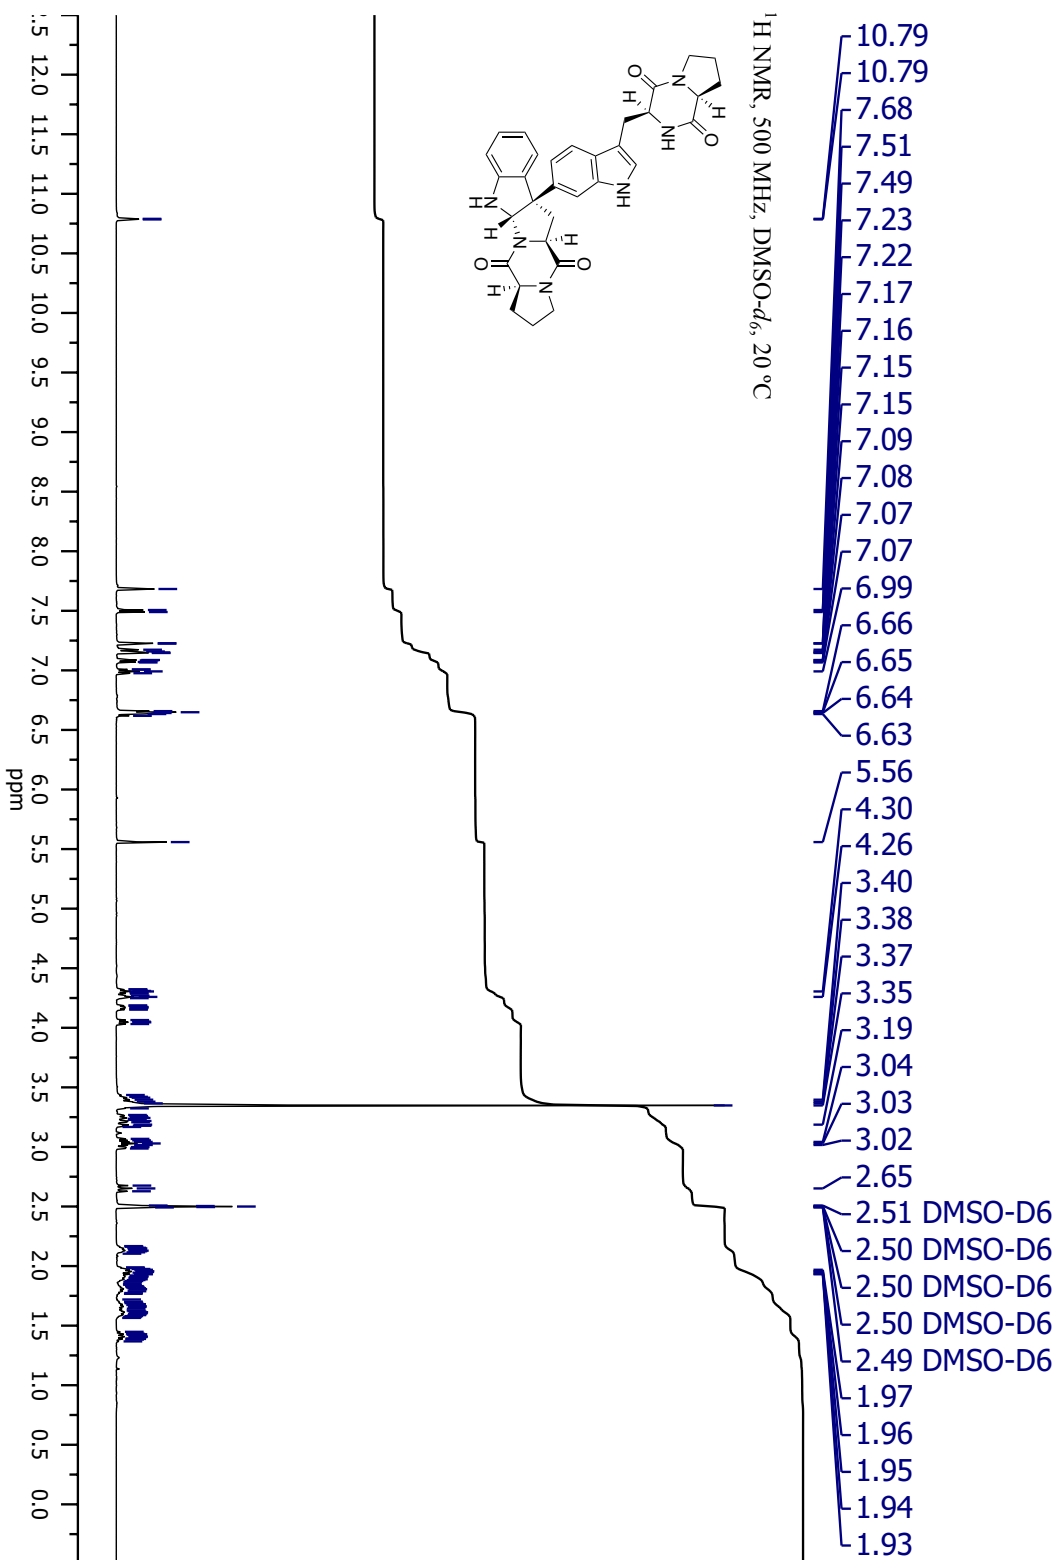

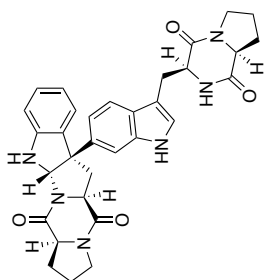

$^{13}\text{C}$  NMR, 125 MHz, DMSO- $d_6$ , 20 °C

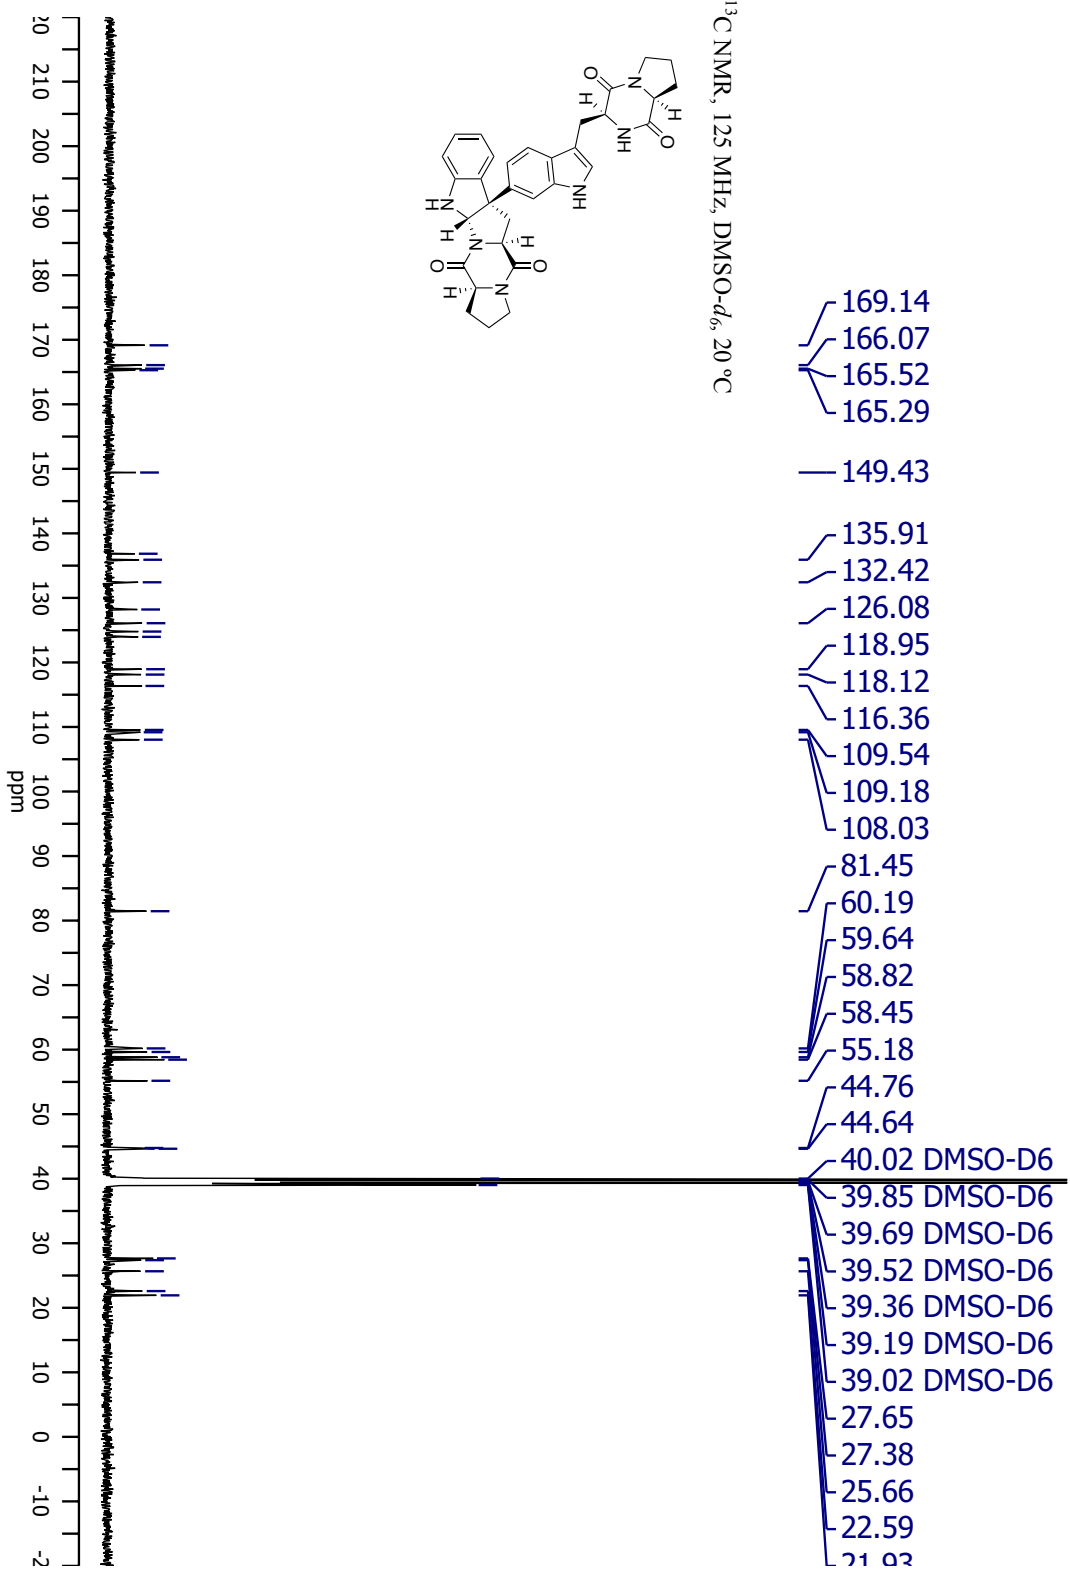

Supplement: NIHMS1620549-supplement-Supplementary_Information.pdf [file NIHMS1620549-supplement-Supplementary_Information.pdf]
